# Supplementary material for: Identification of a CO2 Responsive Regulon in Bordetella
Source: PLoS One. 2012 Oct 24;7(10):e47635. doi: 10.1371/journal.pone.0047635 (PMC3480411; doi:10.1371/journal.pone.0047635)
Supplement: Table S1 — B. bronchiseptica strain RB50 Expression Arrays 1 & 2. (XLS) [file pone.0047635.s002.xls]

## Sheet: Table S1.
Table S1. B. bronchiseptica strain RB50 Expression Arrays 1 & 2.					5%CO2vO2		O2v5%CO2 (dye swap)
					5%CO2 Cy3 green (positive)		O2 Cy3 green (negative)
					O2 Cy3 red (negative)		5%CO2 Cy3 red (positive)
ORF	Name	Product	Function	General Category	Fold-Change	STEM	Fold-Change	STEM	SAM	Score(d)	q-value(%)	localfdr(%)
16S_RNA					1	0.234317	1	0.0372424
23S_RNA					-1.15283	0.162267	-1.08004	0.0547342
BB0001	gidA	glucose inhibited division protein A			-1.88169	0.0742796	1.1154	0.129894
BB0002	gidB	glucose inhibited division protein B		cell cycle	-2.18849	0.020287	1.22563	0.12026
BB0003	parA, soj	ParA family protein			-2.41243	0.0354887	1.38198	0.108643	negative	-5.12413	0	6.86122
BB0004		Putative acetyltransferase, GnaT family	N-acetyltransferase activity		-2.33892	0.0332323	1.5132	0.0558786	negative	-5.23144	0	6.55317
BB0005	parB	probable chromosome partitioning protein ParB	DNA binding	plasmid partitioning (sensu Bacteria)	-2.1835	0.102112	1.14365	0.108111
BB0006	ansB	L-asparaginase II precursor	asparaginase activity	asparagine metabolism	-1.81171	0.0458821	1.12563	0.0512028
BB0008	secE, prlG	preprotein translocase SecE subunit	protein translocase activity	protein targeting	-1.98991	0.0959977	1.20838	0.0713236
BB0009	nusG	transcription antitermination protein NusG	transcriptional elongation regulator activity	regulation of transcription, DNA-dependent	-2.28835	0.0447584	1.3297	0.0341501	negative	-4.29397	0	9.44967
BB0010	rplK, relC	50S ribosomal protein L11	structural constituent of ribosome	translation	-1.80036	0.102479	1.00203	0.0760778
BB0011	rplA	50S ribosomal protein L1	RNA binding	translation	-1.4194	0.0692963	1.08071	0.0388169
BB0012	rplJ	50S ribosomal protein L10	structural constituent of ribosome	translation	1.5991	0.337561	-1.12539	0.0568732
BB0013	rplL	50S ribosomal protein L7	structural constituent of ribosome	translation	1.00318	0.178075	1.18071	0.0176965
BB0014	rpoB, groN, nitB, rif, ron, stl, stv, tabD	DNA-directed RNA polymerase beta chain	transcription, DNA-dependent	Global Regulatory Functions	-2.15458	0.0944994	1.30423	0.0264218
BB0015	rpoC, tabB	DNA-directed RNA polymerase beta' chain	transcription, DNA-dependent	Global Regulatory Functions	-1.12724	0.158834	1.02589	0.143236
BB0016		putative lipoprotein		Periplasmic/ Exported/ Lipoprotein	-3.32837	0.0225	1.25431	0.0925
BB0017		putative membrane protein	protein kinase activity	protein amino acid phosphorylation	-1.75083	0.139852	1.30761	0.0231625
BB0018		probable two-component sensor protein	two-component sensor molecule activity	Global Regulatory Functions	-2.80146	0.0253286	1.18858	0.154837	negative	-9.17983	0	0
BB0019		putative peptidoglycan binding protein		cell wall catabolism	-2.20118	0.0726043	1.2731	0.00441588
BB0020		probable two-component response regulator	two-component response regulator activity	Global Regulatory Functions	-2.50623	0.037235	1.10228	0.110736	negative	-5.29673	0	6.36894
BB0021		Two-component response regulator	two-component response regulator activity	Global Regulatory Functions	-2.50948	0.0782665	1.20609	0.0781612	negative	-3.3454	0	12.7501
BB0022		putative metal transporter	cation transporter activity	transport	-2.38723	0.113284	1.25042	0.115508
BB0023		conserved hypothetical protein		Conserved in organism other than E. coli	-1.99551	0.235521	1.05102	0.188386
BB0024	rpsL	30S ribosomal protein S12	structural constituent of ribosome	translation	-2.41591	0.0787611	1.73604	0.174075	negative	-3.19847	0	13.2764
BB0025	rpsG	30S ribosomal protein S7	structural constituent of ribosome	translation	-1.75266	0.0353934	1.27208	0.075865
BB0026	fusA, fus, far1	elongation factor G	translation elongation factor activity	translation	-1.6372	0.12567	1.15863	0.139613
BB0027	tuf, tufA, tufB	elongation factor Tu			-1.84563	0.0473652	1.47716	0.0723683
BB0028	rpsJ, nusE	30S ribosomal protein S10	tRNA binding	translation	-1.90148	0.0637096	1.22208	0.0517226
BB0029	rplC	50S ribosomal protein L3	structural constituent of ribosome	translation	-2.34109	0.0359132	1.45457	0.0713166	negative	-4.67599	0	8.21509
BB0030	rplD	50S ribosomal protein L4	structural constituent of ribosome	translation	-2.28887	0.0157722	1.23629	0.0247433	negative	-7.67732	0	1.41631
BB0031	rplW	50S ribosomal protein L23	RNA binding	translation	-1.63019	0.0741152	1.26675	0.0291815
BB0032	rplB	50S ribosomal protein L2	structural constituent of ribosome	translation	-1.7247	0.0412445	1.26015	0.00753188
BB0033	rpsS	30S ribosomal protein S19	structural constituent of ribosome	translation	-1.49184	0.154809	1.44239	0.126454
BB0034	rplV	50S ribosomal protein L22	structural constituent of ribosome	translation	-1.66198	0.0242386	1.3165	0.154101
BB0035	rpsC	30S ribosomal protein S3	nucleic acid binding	translation	-1.47456	0.0762101	1.03579	0.066595
BB0036	rplP	50S ribosomal protein L16	structural constituent of ribosome	translation	-1.30094	0.110667	1.16497	0.0543821
BB0037	rpmC	50S ribosomal protein L29	structural constituent of ribosome	translation	-1.98011	0.0512742	1.31574	0.109744
BB0038	rpsQ	30S ribosomal protein S17	structural constituent of ribosome	translation	-1.47781	0.0810638	-1.16534	0.062978
BB0039		putative hydrolase	hydrolase activity		NA	NA	-1.2859	0.0319427
BB0040		putative aldehyde dehydrogenase	oxidoreductase activity	metabolism	-1.19418	0.112408	1.18299	0.0339027
BB0041	rplN	50S ribosomal protein L14	structural constituent of ribosome	translation	-1.96656	0.060437	2.03401	0.102626
BB0042	rplX	50S ribosomal protein L24	structural constituent of ribosome	translation	-2.03831	0.0546732	1.43299	0.0576664
BB0043	rplE	50S ribosomal protein L5	structural constituent of ribosome	translation	-1.43254	0.0639872	1.2731	0.0898972
BB0044	rpsN	30S ribosomal protein S14	structural constituent of ribosome	translation	-2.03955	0.0479421	1.44492	0.109571
BB0045	rpsH	30S ribosomal protein S8	structural constituent of ribosome	translation	-1.6885	0.0517537	1.01624	0.0751909
BB0046	rplF	50S ribosomal protein L6	structural constituent of ribosome	translation	-1.86931	0.0315201	1.60051	0.104551
BB0047	rplR	50S ribosomal protein L18	structural constituent of ribosome	translation	-1.77181	0.0498714	1.22995	0.0269521
BB0048	rpsE	30S ribosomal protein S5	structural constituent of ribosome	translation	-1.97738	0.0837252	1.14721	0.116517
BB0049	rpmD	50S ribosomal protein L30	structural constituent of ribosome	translation	-1.47607	0.0691971	1.13706	0.0341541
BB0050	rplO	50S ribosomal protein L15	structural constituent of ribosome	translation	-2.0006	0.045792	1.36015	0.0995501
BB0051	secY, prlA	preprotein translocase SecY subunit	protein translocase activity	protein secretion	-2.52702	0.0161192	1.73579	0.201439	negative	-9.13834	0	0
BB0052	infA	translation initiation factor IF-1	RNA binding	translation	-2.45844	0.0184764	1.44898	0.0109725	negative	-8.06695	0	0.917602
BB0053	rpmJ	50S ribosomal protein l36	structural constituent of ribosome	translation	-2.19494	0.0342955	1.39086	0.0614912	negative	-4.06114	0	10.2338
BB0054	rpsM	30S ribosomal protein S13	RNA binding	translation	-1.52835	0.0862762	1.08655	0.0488576
BB0055	rpsK	30S ribosomal protein S11	structural constituent of ribosome	translation	-2.0379	0.0843736	1.14695	0.0627434
BB0056	rpsD, ramA	30S ribosomal protein S4	structural constituent of ribosome	translation	-1.84869	0.0235425	1.1132	0.0351319
BB0057	rpoA	DNA-directed RNA polymerase alpha chain	transcription, DNA-dependent	Global Regulatory Functions	-2.83239	0.0471188	1.29213	0.0125125	negative	-5.3397	0	6.24901
BB0058		50S ribosomal protein L17	structural constituent of ribosome	translation	-1.79843	0.0800493	1.06193	0.0660051
BB0059		histidine triad protein			-1.53958	0.089875	-1.06371	0.0993487
BB0060	cutA, cycY, cutA1	putative periplasmic divalent cation toleranceprotein		Periplasmic/ Exported/ Lipoprotein	-1.5529	0.0671215	1.02284	0.0651223
BB0061		thiol:disulfide interchange protein	electron transporter activity	electron transport	-1.33497	0.123424	-1.1108	0.0864401
BB0062		putative membrane protein		Cell envelope	-1.90544	0.0415	1.09746	0.0714633
BB0063	hemB	putative delta-aminolevulinic acid dehydratase	porphobilinogen synthase activity	heme biosynthesis	-1.42604	0.060063	-1.12507	0.126105
BB0064		putative GTP-binding protein			-1.91451	0.0382654	1.04695	0.0546144
BB0065		putative cytochrome C precursor	electron transporter activity	electron transport	-2.04495	0.0366558	1.29188	0.108709
BB0066		putative membrane protein		Cell envelope	-1.95016	0.0289467	1.08528	0.0351188
BB0067		putative cytochrome c asssembly protein		cytochrome c oxidase biogenesis	-1.78915	0.0472198	1.06954	0.0172264
BB0068	lysA	diaminopimelate decarboxylase	diaminopimelate decarboxylase activity	lysine biosynthesis via diaminopimelate	-1.90652	0.0655708	-1.01416	0.0325048
BB0069	cyaY	conserved hypothetical protein		Conserved in organism other than E. coli	-1.35768	0.0570033	-1.12507	0.0324615
BB0070		penicillin-binding protein 1A	penicillin binding	peptidoglycan biosynthesis	-2.87368	0.0295312	1.29162	0.201768	negative	-7.50691	0	1.6598
BB0071	aroK	shikimate kinase I	amino acid biosynthesis	metabolism	-1.85722	0.0578727	1.10609	0.0102673
BB0072	aroB	3-dehydroquinate synthase	aromatic amino acid family biosynthesis, shikimate pathway	metabolism	-1.94864	0.0757249	1.2033	0.0459173
BB0073		putative phosphohydrolase	magnesium ion binding	GTP metabolism	-2.13936	0.0711077	1.09289	0.0603165
BB0074		putative glutathione S-transferase	transferase activity		-1.57562	0.180547	1.27716	0.0744133
BB0075	uvrA	excinuclease ABC subunit A	ATP-binding cassette (ABC) transporter activity	nucleotide-excision repair	-1.84529	0.0558369	1.29086	0.0577834
BB0076		putative transport protein	transporter activity	transport	-1.55916	0.158992	1.18858	0.090226
BB0077	ssb	single-strand binding protein	single-stranded DNA binding	DNA replication	-1.72263	0.0993309	-1.05319	0.116202
BB0078	bfrC	ferric siderophore receptor	receptor activity	transport	-2.46156	0.0502607	-1.03575	0.123885	negative	-4.50303	0	8.76538
BB0079		conserved hypothetical protein		Conserved in organism other than E. coli	-2.47843	0.0772414	1.11523	0.0264748
BB0080		putative aldolase	aldolase activity	metabolism	-2.31096	0.0404577	1.18249	0.0391416	negative	-4.26942	0	9.53128
BB0081		putative exported protein		Periplasmic/ Exported/ Lipoprotein	-2.2626	0.105868	1.15305	0.0270782
BB0082		GntR family regulatory proteins	transcription factor activity	Global Regulatory Functions	-1.69647	0.0276953	1.06015	0.0273903
BB0083		transcriptional regulator	transcription factor activity	Global Regulatory Functions	-1.44406	0.125477	-1.23705	0.101271
BB0084		putative chlorohydrolase	hydrolase activity		-1.53535	0.1535	-1.28088	0.135244
BB0085		putative exported protein		Periplasmic/ Exported/ Lipoprotein	-2.23544	0.0770102	1.19239	0.0673777
BB0086		putative glycosyl transferases	transferase activity	biosynthesis	-1.56766	NA	1.48054	0.11168
BB0087		hypothetical protein		Unknown proteins, no known homologs	-1.90508	0.069568	1.18223	0.0221077
BB0088		LysR family regulatory protein	transcription factor activity	Global Regulatory Functions	-1.56987	0.0375	1.0665	0.0285
BB0089		periplasmic solute-binding protein		transport	-2.00459	0.0884788	1.11066	0.031
BB0090		ABC transport system permease protein	transporter activity	transport	-2.17358	0.104582	1.03503	0.0361974
BB0091		ABC transporter ATP-binding protein	ATP-binding cassette (ABC) transporter activity	transport	-1.83703	0.0962275	-1.1021	0.0282706
BB0092		conserved hypothetical protein		Conserved in organism other than E. coli	-1.74052	0.132366	-1.26444	0.033
BB0093		putative exported protein		Periplasmic/ Exported/ Lipoprotein	NA	NA	-1.1643	NA
BB0094		TetR-family transcriptional regulator	transcription factor activity	Global Regulatory Functions	-1.19745	0.188891	-1.71379	0.0366796
BB0095	glcB, glc	malate synthase G	glyoxylate cycle	metabolism	1.05898	0.0719063	-1.71752	0.0271861
BB0096	glcC	GntR-family transcriptional regulator	transcription factor activity	regulation of transcription, DNA-dependent	-1.54455	0.24408	1.0231	0.0947166
BB0097		putative dehydrogenase		metabolism	-1.80715	0.279406	1.23486	0.153953
BB0098		Putative exported protein		Periplasmic/ Exported/ Lipoprotein	-1.04218	0.465274	-1.45818	0.177044
BB0099		UbiA prenyltransferase family protein	prenyltransferase activity	biosynthesis	-2.75291	0.105761	1.41624	0.0810401
BB0100		putative aminotransferase	alanine-glyoxylate transaminase activity	biosynthesis	-1.82553	0.0740167	1.1802	0.0380318
BB0101		conserved hypothetical protein		Conserved in organism other than E. coli	-1.85551	0.0572011	1.24196	0.0430981
BB0102		putative dihydrodipicolinate synthase			-2.27026	0.0685699	1.25508	0.0551413
BB0103		putative desaturase	catalytic activity	metabolism	-3.11957	0.0703331	1.35076	0.125867	negative	-4.32491	0	9.34717
BB0105		putative fatty acid desaturase	oxidoreductase activity		-4.38413	0.023052	1.28376	0.0215	negative	-3.61307	0	11.7957
BB0106		conserved hypothetical protein		Conserved in organism other than E. coli	-3.26038	0.0505206	NA	NA
BB0107		conserved hypothetical protein		Conserved in organism other than E. coli	-2.29174	0.16097	-1.03195	0.3265
BB0108		probable amino acid permease	amino acid-polyamine transporter activity	transport	-1.64459	0.0732041	-1.13153	0.0155
BB0109		Putative methyltransferase	S-adenosylmethionine-dependent methyltransferase activity		-1.24381	0.119612	-1.04843	0.0542225
BB0110		putative adhesin		cell adhesion	3.01343	0.230166	-3.81413	0.00606046	positive	24.9968	0	0.034102
BB0111		putative dehydrogenase	oxidoreductase activity, acting on CH-OH group of donors	metabolism	-1.00602	0.320286	-1.10674	0.139194
BB0112		putative membrane protein		Cell envelope	-4.37174	0.0303113	1.81701	0.0254898	negative	-3.19842	0	13.2766
BB0113		conserved hypothetical protein		Conserved in organism other than E. coli	-2.09785	0.0199105	1.42005	0.0440064	negative	-5.41802	0	6.0332
BB0114		putative membrane protein		Cell envelope	-2.23594	0.0630554	1.07995	0.0430704
BB0115	aspS, tls	aspartyl-tRNA synthetase	magnesium ion binding	translation	-1.99346	0.067773	-1.06833	0.125609
BB0116		putative endonuclease	endonuclease activity		-1.84903	0.0449886	1.15381	0.0431248
BB0117		putative phospholipase	catalytic activity	metabolism	-1.56182	0.0764716	-1.3192	0.0995747
BB0118		putative membrane protein		Cell envelope	-1.72367	0.0660207	-1.00647	0.0976496
BB0119		putative membrane protein	transporter activity	transport	-1.30839	0.0718551	-1.1561	0.0359328
BB0120		putative membrane protein		Cell envelope	1.35306	0.15875	-1.57014	0.0263333
BB0121		NAD dependent epimerase	catalytic activity	nucleotide-sugar metabolism	-1.97894	0.0262925	1.34518	0.143287		-3.36594	0	12.6765
BB0122		DegT	transaminase activity		-1.59249	0.0674456	1.35787	0.112498
BB0123		putative asparagine synthetase	asparagine synthase (glutamine-hydrolyzing) activity	metabolism	-4.64864	0.0421989	1.43553	0.143214	negative	-3.34387	0	12.7555
BB0124		putative UDP-glucose 4-epimerase			-2.73011	0.0488845	1.55838	0.0232056	negative	-5.13409	0	6.83234
BB0125		putative phosphoesterase	hydrolase activity		-2.89937	0.0464378	1.65127	0.224978	negative	-5.61709	0	5.50086
BB0126		conserved hypothetical protein		Conserved in organism other than E. coli	-3.52436	0.0193283	1.95305	0.0218494	negative	-12.0398	0	0
BB0127		putative C-methyltransferase	S-adenosylmethionine-dependent methyltransferase activity		-3.32947	0.0204624	1.87259	0.03631	negative	-11.2107	0	0
BB0128	wbmS	hypothetical protein		Unknown proteins, no known homologs	-3.41079	0.024695	1.7901	0.16323	negative	-9.9898	0	0
BB0129	wbmR	putative formyl transferase	hydroxymethyl-, formyl- and related transferase activity	biosynthesis	-3.85544	0.0182148	1.86878	0.0918344	negative	-13.3378	0	0
BB0130	wbmO	hypothetical protein		Unknown proteins, no known homologs	-2.52448	0.0404964	1.91954	0.546189	negative	-5.13888	0	6.81849
BB0131	wbmN	ABC transporter ATP-binding protein	ATP-binding cassette (ABC) transporter activity	transport	-2.78224	0.0389253	1.36294	0.252946	negative	-6.38834	0	3.66985
BB0132	wbmM	ABC transporter ATP-binding protein	ATP-binding cassette (ABC) transporter activity	transport	-3.38211	0.0311734	1.9269	0.352106	negative	-8.46524	0	0.486679
BB0133	wbmL	ABC transporter integral membrane protein	ATP-binding cassette (ABC) transporter activity	transport	-2.58138	0.0534279	1.3	0.0184233	negative	-4.29438	0	9.4483
BB0134	wbmK	hypothetical protein		Unknown proteins, no known homologs	-2.01463	0.0906515	1.34543	0.0205928
BB0135	wbmJ	hypothetical protein		Unknown proteins, no known homologs	-3.83135	0.0435862	1.63723	0.239572	negative	-5.81814	0	4.9876
BB0136	wbmI	putative asparagine synthetase	asparagine synthase (glutamine-hydrolyzing) activity	asparagine biosynthesis	-2.72051	0.0286891	1.93071	0.168508	negative	-7.00744	0	2.46661
BB0137	wbmH	nucleotide sugar epimerase	catalytic activity	nucleotide-sugar metabolism	-2.72863	0.0419169	1.54036	0.062337	negative	-5.53691	0	5.71244
BB0138	wbmG	nucleotide sugar epimerase	catalytic activity	nucleotide-sugar metabolism	-2.07491	0.0298291	1.46675	0.108205	negative	-3.79986	0	11.1374
BB0139	wbmF	nucleotide sugar epimerase	catalytic activity	nucleotide-sugar metabolism	-2.49814	0.0296888	1.32995	0.0812178	negative	-6.11599	0	4.27378
BB0140	wbmE	putative exported protein		Periplasmic/ Exported/ Lipoprotein	-3.2425	0.0617864	1.6434	0.252676	negative	-5.21581	0	6.59765
BB0141	wbmD	putative membrane protein		Cell envelope	-4.78582	0.0535054	1.83198	0.3842	negative	-5.65526	0	5.40152
BB0142	wbmC	putative glutamine amidotransferase	asparagine synthase (glutamine-hydrolyzing) activity	metabolism	-3.33721	0.0556312	1.7703	0.429544	negative	-5.73551	0	5.19554
BB0143	wbmB	hypothetical protein		Unknown proteins, no known homologs	-3.10531	0.014509	1.25508	0.219536	negative	-13.2582	0	0
BB0144	wbmA	putative glycosyl transferase	transferase activity	biosynthesis	-2.59953	0.0473967	1.18807	0.0108195	negative	-4.59986	0	8.45548
BB0145	bplL, wlbL	lipopolysaccharide biosynthesis protein		Cell envelope	-2.2172	0.0786839	1.20457	0.0295
BB0146	bplJ, bplK, wlbjK	putative membrane protein		Cell envelope	-2.33457	0.0996248	2.15025	0.578748
BB0147	bplI, wlbI	lipopolysaccharide biosynthesis protein		Cell envelope	-2.39747	0.0690304	1.54721	0.119469
BB0148	bplH, wlbH	putative glycosyl transferase	transferase activity	biosynthesis	-2.67848	0.0748887	1.21726	0.0237136	negative	-3.45036	0	12.3748
BB0149	bplG, wlbG	probable sugar transferase	transferase activity		-2.83239	0.0918813	1.18579	0.001
BB0150	bplF, wlbF	lipopolysaccharide biosynthesis protein		Cell envelope	-2.50936	0.0931008	1.25888	0.0815486
BB0151	bplE, wlbE	probable glycosyl transferase	transferase activity	biosynthesis	-3.97431	0.0269872	2.17208	0.138132	negative	-10.0609	0	0
BB0152	bplD, wlbD	UDP-N-acetylglucosamine 2-epimerase	UDP-N-acetylglucosamine 2-epimerase activity	UDP-N-acetylglucosamine metabolism	-1.62518	0.10192	1.40711	0.0337367
BB0153	bplC, wlbC	lipopolysaccharide biosynthesis protein		Cell envelope	-3.21451	0.0613159	1.43325	0.0625665	negative	-4.63257	0	8.35181
BB0154	bplB, wlbB	probable acetyltransferase	transferase activity		-1.77839	0.0583276	1.34112	0.10049
BB0155	bplA, wlbA	probable oxidoreductase	oxidoreductase activity	electron transport	-2.42992	0.0202347	1.37614	0.0805124	negative	-7.78689	0	1.26801
BB0156	rfaC, waaC	probable heptosyltransferase	transferase activity	metabolism	-2.24944	0.0510333	1.17208	0.181
BB0157	kdtA, waaA	3-deoxy-D-manno-octulosonic-acid transferase	sugar binding	carbohydrate metabolism	-2.09916	0.0166126	-1.0866	0.0370011	negative	-5.6094	0	5.521
BB0158		putative exported protein		Periplasmic/ Exported/ Lipoprotein	-1.67149	0.0465259	-1.09475	0.0916646
BB0159		putative exported protein		Periplasmic/ Exported/ Lipoprotein	-2.91576	0.104937	1.16904	0.0246391
BB0160	baf	Bvg accessory factor		regulation of transcription, DNA-dependent	-1.82586	0.0860199	-1.0887	0.0706864
BB0161	birA	putative biotin protein ligase	biotin-[acetyl-CoA-carboxylase] ligase activity	protein modification	-1.64056	0.0642504	-1.00305	0.0484458
BB0163		putative integral membrane protein			-1.5973	0.0910639	1.02944	0.0172337
BB0164		probable ATP-binding component of ABCtransporter	ATP-binding cassette (ABC) transporter activity	transport	-1.43528	0.0720206	1.14518	0.0272336
BB0165		putative exported protein		Periplasmic/ Exported/ Lipoprotein	-1.73572	0.0860433	1.05964	0.0860304
BB0166		putative exported protein		Periplasmic/ Exported/ Lipoprotein	-1.85107	0.0617137	1.08122	0.0676855
BB0167		conserved hypothetical protein	catalytic activity	Conserved in organism other than E. coli	-1.54955	0.0705137	-1.49639	0.0248575
BB0168		putative penicillin-binding protein precursor	serine-type D-Ala-D-Ala carboxypeptidase activity	proteolysis and peptidolysis	-2.07963	0.103304	1.10964	0.0922849
BB0169		probable class IV aminotransferase	transaminase activity	metabolism	-1.91123	0.0491307	1.14873	0.0344928
BB0170		conserved hypothetical protein		Conserved in organism other than E. coli	-1.62808	0.0394839	1.17792	0.0609253
BB0171	lipB	lipoate-protein ligase B	acyltransferase activity	lipoate biosynthesis	-1.37251	0.142415	1.05888	0.0590254
BB0172	lipA, lip	lipoic acid synthetase	sulfurtransferase activity	lipoate biosynthesis	-1.6339	0.0624813	1.02843	0.0642106
BB0173	rfbC, rmlC	dTDP-4-dehydrorhamnose 3,5-epimerase	lipopolysaccharide biosynthesis	Cell envelope	-1.38384	0.173905	1.07005	0.0949825
BB0174	rfbD, rmlD	dTDP-4-dehydrorhamnose reductase	dTDP-4-dehydrorhamnose reductase activity	extracellular polysaccharide biosynthesis	-2.00028	0.154836	1.03782	0.0391181
BB0175	rfbB, rmlB	dTDP-glucose 4,6-dehydratase	dTDP-glucose 4,6-dehydratase activity	nucleotide-sugar metabolism	-1.44718	0.0550127	-1.03087	0.0594608
BB0176		conserved hypothetical protein		Conserved in organism other than E. coli	-2.05162	0.0291175	-1.03521	0.0457757	negative	-3.74379	0	11.3341
BB0177		putative exported protein		Periplasmic/ Exported/ Lipoprotein	-1.47651	0.0581624	1.0269	0.0734036
BB0178	hslU, htpI	ATP-dependent Hsl protease ATP-binding subunit	chaperone activity	Folding and Ushering	-1.40335	0.0529014	-1.19503	0.00906803
BB0179	hslV, htpO	ATP-dependent protease heat shock protein	endopeptidase activity	Folding and Ushering	-1.37101	0.0962811	-1.18746	0.0383264
BB0180	dksA	putative dnaK suppressor protein			-1.83352	0.0287437	-1.09141	0.069155
BB0181		conserved hypothetical protein		Conserved in organism other than E. coli	-2.36477	0.0225295	1.26954	0.138439	negative	-7.24807	0	2.06027
BB0182		putative regulatory protein	transcription factor activity	Global Regulatory Functions	-1.9004	0.0520137	-1.07415	0.0315885
BB0183		putative transport protein ATP-binding	ATP-binding cassette (ABC) transporter activity	transport	-1.07437	0.192469	-1.40413	0.0143788
BB0184		putative ABC transporter permease protein	ATP-binding cassette (ABC) transporter activity	transport	NA	NA	NA	NA
BB0185		putative periplasmic solute binding protein	binding	transport	1.05351	0.3625	1.1736	NA
BB0186		conserved hypothetical protein		Conserved in organism other than E. coli	-3.33499	0.0255	-1.22665	NA
BB0187		putative membrane protein		Cell envelope	-2.11106	0.0748618	1.54188	0.139158
BB0189		putative outer membrane protein	receptor activity	transport	NA	NA	NA	NA
BB0190		putative integrase	DNA binding	DNA recombination	-2.12831	0.027551	1.40051	0.0269243	negative	-3.62653	0	11.748
BB0191		conserved hypothetical protein		Conserved in organism other than E. coli	-1.69647	0.0698414	1.15051	0.120127
BB0192	dapF	diaminopimelate epimerase	diaminopimelate epimerase activity	lysine biosynthesis via diaminopimelate	-1.91524	0.115899	1.30863	0.161469
BB0193		putative acyltransferase	lipopolysaccharide core region biosynthesis	Cell envelope	-1.9445	0.125195	-1.00536	0.0192803
BB0194		putative acyltransferase	lipopolysaccharide core region biosynthesis	Cell envelope	-1.79138	0.0562176	-1.13939	0.064754
BB0195	metK	S-adenosylmethionine synthetase	magnesium ion binding	one-carbon compound metabolism	-1.78533	0.08239	1.05457	0.0408827
BB0196		conserved hypothetical protein		Conserved in organism other than E. coli	-1.88879	0.141582	1.40981	0.128766
BB0197		putative glycosyl transferase	transferase activity	biosynthesis	NA	NA	-1.25638	0.123
BB0198	acyH	adenosylhomocysteinase	adenosylhomocysteinase activity	one-carbon compound metabolism	-1.15575	0.115092	-1.0887	0.0239666
BB0199		putative membrane protein		Cell envelope	-1.53371	0.135698	-1.00562	0.0282799
BB0200		putative methylenetetrahydrofolate reductase	methylenetetrahydrofolate reductase (NADPH) activity	methionine biosynthesis	-1.36302	0.1162	1.01294	0.0649594
BB0201		putative transcriptional regulator	transcription factor activity	Global Regulatory Functions	-1.56255	0.0315	-1.30723	0.0075
BB0202		putative aminohydrolase	hydrolase activity		-1.78091	0.012	1.02437	0.005
BB0203		putative integral membrane transport protein	transporter activity	transport	NA	NA	NA	NA
BB0205		5-formyltetrahydrofolate cyclo-ligase familyprotein	ligase activity	metabolism	-1.83787	0.0459967	-1.12155	0.0179832
BB0206		putative transglycosylase			-1.53911	0.05091	-1.13218	0.122445
BB0207	cca	tRNA nucleotidyltransferase	RNA binding	translation	-1.593	0.0742204	-1.07591	0.024975
BB0208		conserved hypothetical protein	S-adenosylmethionine-dependent methyltransferase activity	Conserved in organism other than E. coli	-2.91449	0.0832282	1.66015	0.241741	negative	-3.31216	0	12.8691
BB0209		putative ATP-dependent RNA helicase	nucleic acid binding		-4.5767	0.0336486	3.17716	0.150568	negative	-8.64589	0	0.315729
BB0210	ung	uracil-DNA glycosylase	uracil DNA N-glycosylase activity	carbohydrate metabolism	NA	NA	1.36007	0.136021
BB0211		haloacid dehalogenase-like hydrolase	hydrolase activity	metabolism	NA	NA	1.51574	0.0426732
BB0212		phosphorylase family protein	catalytic activity	nucleoside metabolism	-1.95928	0.0663936	1.01371	0.05126
BB0213		conserved hypothetical protein		Conserved in organism other than E. coli	1.0544	NA	-1.12315	NA
BB0214		AraC family transcriptional regulator	transcription factor activity	Global Regulatory Functions	NA	NA	-1.06602	0.267
BB0215	fur	ferric uptake regulation protein	transcription factor activity	Global Regulatory Functions	NA	NA	NA	NA
BB0216		conserved hypothetical protein		Conserved in organism other than E. coli	NA	NA	-1.01129	0.306
BB0217		putative Na+		sodium ion transport	-1.39624	0.0566927	-1.16614	0.126524
BB0218		hypothetical protein		Unknown proteins, no known homologs	-1.48633	0.105782	1.02843	0.0290603
BB0219		putative glycosyl transferase	transferase activity	biosynthesis	-1.33172	0.101665	-1.07036	0.0470343
BB0220		conserved hypothetical protein		Conserved in organism other than E. coli	-1.32739	0.0654185	-1.04927	0.0739869
BB0221		acetyltransferase (GNAT) family protein	N-acetyltransferase activity		-1.21864	0.049054	-1.14802	0.0479114
BB0222		conserved hypothetical protein		Conserved in organism other than E. coli	-1.93403	0.0232898	-1.06371	0.0851724
BB0223		metallo-beta-lactamase superfamily protein			-1.17635	0.0972911	-1.29435	0.0121655
BB0224		ArsR family regulatory protein	transcription factor activity	Global Regulatory Functions	-1.39324	0.0363212	-1.07298	0.0187927
BB0225		putative membrane protein		Cell envelope	-1.50569	0.160102	1.08883	0.0212034
BB0226		putative membrane protein		Cell envelope	-1.88685	0.0416112	-1.08272	0.0434825
BB0227		putative phenylacetate-CoA ligase	ligase activity	metabolism	NA	NA	-1.54147	0.0910458
BB0228		ABC transporter ATP-binding protein	ATP-binding cassette (ABC) transporter activity	transport	-3.3152	0.1465	-1.38149	0.065
BB0229		putative exported protein		Periplasmic/ Exported/ Lipoprotein	-1.62308	0.0325	-1.2076	0.161627
BB0230		putative branched-chain amino acid transportsystem permease	transporter activity	transport	-2.46718	0.0711329	-1.32437	0.0737895
BB0231		putative branched-chain amino acid transportsystem permease	transporter activity	transport	-2.32916	0.0147507	-1.03394	0.0861904	negative	-4.0624	0	10.2294
BB0232		putative high-affinity branched-chain amino acidtransport ATP-binding protein	ATP-binding cassette (ABC) transporter activity	transport	-1.97808	0.0922781	1.06523	0.13111
BB0233		putative AMP-binding enzyme	catalytic activity	metabolism	-5.30327	NA	1.82843	NA
BB0234		cyclic nucleotide-binding protein			-1.47781	NA	1.07919	0.245
BB0235		probable transporter	lysine permease activity	transport	-1.90761	0.095304	1.35812	0.192932
BB0236		probable LysR-family transcriptional regulator	transcription factor activity	Global Regulatory Functions	-1.04893	0.358143	1.0198	0.0183235
BB0237		putative exported protein		Periplasmic/ Exported/ Lipoprotein	-1.4303	0.126955	1.17614	0.0150582
BB0238		putative exported protein		Periplasmic/ Exported/ Lipoprotein	-1.78407	0.0375719	1.01142	0.0413932
BB0239		conserved hypothetical protein	alanine racemase activity	Conserved in organism other than E. coli	-1.01381	0.0958885	-1.45872	0.0866914
BB0240		probable aminotransferase	transaminase activity	biosynthesis	-1.1828	0.115611	-1.54389	0.0207043
BB0241		amino acid-binding periplasmic protein	transporter activity	transport	-1.32652	0.127889	-1.14137	0.102184
BB0242		putative membrane protein		Cell envelope	-1.59477	0.0351979	1.04695	0.0239143
BB0243	hmgcL	hydroxymethylglutaryl-CoA lyase	hydroxymethylglutaryl-CoA lyase activity		-1.53114	0.0302035	-1.23472	0.0385841
BB0244	smf	conserved hypothetical protein		DNA mediated transformation	-1.97296	0.0816043	-1.37955	0.001
BB0245	lrp, alsB, livR, ihb, oppI	leucine-responsive regulatory protein	transcription factor activity	Global Regulatory Functions	-1.73661	0.103285	1.21117	0.158197
BB0246		conserved hypothetical protein		Conserved in organism other than E. coli	-2.00459	0.0587466	1.41574	0.0829784	negative	-3.46902	0	12.3082
BB0247	def, fms	polypeptide deformylase	formylmethionine deformylase activity	protein biosynthesis	-1.51431	0.0936795	-1.16775	0.0360428
BB0248	fmt	methionyl-tRNA formyltransferase	methionyl-tRNA formyltransferase activity	translation	-1.54194	0.0211209	-1.08281	0.0188532
BB0249		conserved hypothetical protein	pyridoxamine-phosphate oxidase activity	pyridoxine biosynthesis	-1.68482	0.0428779	1.00305	0.0322051
BB0250		probable haloacid dehalogenase-like hydrolase	hydrolase activity	metabolism	-1.61189	0.0769028	1.01396	0.0172597
BB0251		hypothetical protein		Unknown proteins, no known homologs	-1.48853	0.0595093	1.02005	0.0101026
BB0252		putative lysine decarboxylase			-2.13709	0.0738807	1.32563	0.0808119
BB0253		bacterioferritin	ferric iron binding	iron ion transport	-1.6052	0.153591	-1.31115	0.096055
BB0254		conserved hypothetical protein		Conserved in organism other than E. coli	-1.85963	0.0191336	1.01658	0.0218581
BB0255		putative 4-oxalocrotonate tautomerase	isomerase activity	aromatic compound metabolism	NA	NA	NA	NA
BB0256		conserved hypothetical protein		Conserved in organism other than E. coli	NA	NA	-1.19539	0.319
BB0257		putative exported protein		Periplasmic/ Exported/ Lipoprotein	NA	NA	NA	NA
BB0258		probable transcriptional regulator	transcription factor activity	Global Regulatory Functions	-1.91414	0.1835	1.05415	0.0604161
BB0259		putative dioxygenase	oxidoreductase activity, acting on single donors with incorporation of molecular oxygen, incorporation of two atoms of oxygen		-1.1377	0.624	-1.66949	0.118812
BB0260		conserved hypothetical protein		Conserved in organism other than E. coli	-1.36062	0.0782431	-1.06228	0.0286251
BB0261		putative amino acid efflux protein	lysine permease activity	transport	-1.62797	0.0926653	-1.32348	0.0208621
BB0262		conserved hypothetical protein	S-adenosylmethionine-dependent methyltransferase activity	Conserved in organism other than E. coli	-2.52765	0.0811603	-1.00127	0.0617918	negative	-3.75544	0	11.2932
BB0263		putative exported protein		Periplasmic/ Exported/ Lipoprotein	-1.65542	0.0268125	-1.09719	0.0690777
BB0264		putative two-component sensor kinase	two-component sensor molecule activity	signal transduction	-2.4938	0.0417325	1.26091	0.12586	negative	-4.81403	0	7.78673
BB0265		putative two-component response regulator	two-component response regulator activity	Global Regulatory Functions	-1.83051	0.0696198	-1.0069	0.0240533
BB0266	trkA	Trk system potassium uptake protein	cation transporter activity	potassium ion transport	-2.24693	0.0859277	1.26168	0.0180572
BB0267	trkH	Trk system potassium uptake protein	cation transporter activity	transport	-2.20287	0.14792	-1.18746	0.0275
BB0268		probable MarR-family transcriptional regulator	transcription factor activity	Global Regulatory Functions	-1.78438	0.143168	-1.32571	0.0417512
BB0269		conserved hypothetical protein		Conserved in organism other than E. coli	-1.7453	0.163181	1.11599	0.126215
BB0270		conserved hypothetical protein		Conserved in organism other than E. coli	-1.34948	0.129313	1.13875	0.030683
BB0271		conserved hypothetical protein	aminocarboxymuconate-semialdehyde decarboxylase activity	metabolism	-1.48216	0.103444	-1.05123	0.0405319
BB0272	maiA	maleate cis-trans isomerase		metabolism	-1.27926	0.0862798	-1.03385	0.0148682
BB0274		conserved hypothetical protein		Conserved in organism other than E. coli	-1.57825	0.0257493	-1.03412	0.0266161
BB0275		putative isochorismatase			-1.57454	0.0251087	1.0632	0.0998852
BB0276		probable ring hydroxylating beta subunit	catalytic activity	electron transport	-1.60983	0.0129718	1.08883	0.0614878
BB0277		probable Ring hydroxylating alpha subunit	iron ion binding	electron transport	-2.25398	0.0885	-1.09444	0.056
BB0278		putative ferredoxin reductase	disulfide oxidoreductase activity	metabolism	-1.59755	0.024	-1.40313	0.0214593
BB0279		ferredoxin	oxidoreductase activity	metabolism	-2.0209	0.0879814	-1.127	0.0427298
BB0280		putative exported protein		transport	-3.18599	0.054	1.09543	0.292
BB0281		oxidoreductase, large chain	oxidoreductase activity	electron transport	-3.61951	NA	-1.02497	0.319
BB0282		oxidoreductase, medium chain	oxidoreductase activity	electron transport	-1.27015	0.200964	1.05178	0.0567186
BB0283		putative iron-sulfur binding protein	electron transporter activity	electron transport	NA	NA	1.10051	0.339
BB0284		putative exported protein		Periplasmic/ Exported/ Lipoprotein	NA	NA	NA	NA
BB0285		probable ABC transporter, ATP-binding component	ATP-binding cassette (ABC) transporter activity	transport	NA	NA	NA	NA
BB0286		ABC transporter, permease component	transporter activity	transport	-2.35867	0.3055	1.49442	0.077
BB0287		putative membrane protein		Cell envelope	-2.32003	0.140392	1.40736	0.217325
BB0288		putative membrane protein		Cell envelope	-1.47651	NA	1.22944	0.244625
BB0289		conserved hypothetical protein	glutamate-cysteine ligase activity	glutathione biosynthesis	-1.78343	0.106102	1.42944	0.282676
BB0290		conserved hypothetical protein	S-adenosylmethionine-dependent methyltransferase activity	Conserved in organism other than E. coli	-1.54512	0.144474	-1.03903	0.0851528
BB0291		conserved hypothetical protein		Conserved in organism other than E. coli	-1.71178	0.048	-1.11341	0.130123
BB0292		rRNA methylase	RNA binding	RNA processing	-1.93291	0.0519503	-1.05319	0.0188917
BB0293		putative exported protein		Periplasmic/ Exported/ Lipoprotein	-1.77839	0.0476121	-1.0563	0.0348557
BB0294	gpsA	glycerol-3-phosphate dehydrogenase [NAD(P)+]	glycerol-3-phosphate dehydrogenase (NAD+) activity	metabolism	-1.90942	0.0578606	1.09543	0.0981665
BB0295	secB	protein-export protein	chaperone activity	transport	-1.41083	0.0651047	-1.05536	0.0331528
BB0296	grxC	glutaredoxin 3	electron transporter activity	electron transport	-1.78502	0.0345151	1.04264	0.0855015
BB0297		conserved hypothetical protein		Conserved in organism other than E. coli	-1.6163	0.0157277	1.13249	0.121838
BB0298	gpmA, gpm	phosphoglycerate mutase 1	glycolysis	metabolism	-1.23465	0.0980223	-1.10674	0.026385
BB0299		putative peptidase	metalloendopeptidase activity	proteolysis and peptidolysis	-1.79361	0.0240896	1.12563	0.00901272
BB0300	ctpA	putative carboxy-terminal processing proteaseprecursor	protein binding	Folding and Ushering	-1.51044	0.0505666	-1.00153	0.0274059
BB0301	thiF	adenylyltransferase	nucleotidyltransferase activity		-1.48107	0.0859196	-1.05179	0.0530495
BB0302		putative GntR-family transcriptional regulator	transcription factor activity	Global Regulatory Functions	-2.35304	0.0648	-1.02604	0.0801395	negative	-3.93996	0	10.65
BB0303		putative oxidoreductase		electron transport	-1.65596	0.0626793	-1.09172	0.045615
BB0304	thiC	thiamine biosynthesis protein		thiamin biosynthesis	-1.42827	0.0680395	1.03782	0.0678532
BB0305		putative lipoprotein		Periplasmic/ Exported/ Lipoprotein	-1.22862	0.0915635	-1.19285	0.0329807
BB0306		putative restriction endonuclease	endonuclease activity		-1.39517	0.049189	1.05152	0.0539048
BB0307		putative DNA methylase	methyltransferase activity		NA	NA	-1.15475	0.005
BB0308		putative transcriptional regulator	DNA binding	Global Regulatory Functions	-1.82951	0.0538083	-1.00974	0.0242023
BB0309		putative transcriptional regulator	DNA binding	Global Regulatory Functions	-1.83101	0.0109116	1.1434	0.100244
BB0310		putative transcriptional regulator			-1.39189	0.507	-1.13088	0.0237136
BB0311	proB	glutamate 5-kinase	RNA binding	proline biosynthesis	-2.50686	0.0556434	1.20228	0.0652653	negative	-4.25368	0	9.58375
BB0312		probable GTP-binding protein	GTP binding		-2.94609	0.0607225	1.42995	0.048512	negative	-4.56329	0	8.57195
BB0313	rpmA	50S ribosomal protein L27	structural constituent of ribosome	translation	-2.37651	0.00903112	1.22893	0.0192895	negative	-10.7487	0	0
BB0314	rplU	50S ribosomal protein L21	RNA binding	translation	-2.75253	0.0497121	1.31396	0.155691	negative	-4.76203	0	7.94694
BB0315		conserved hypothetical protein		Conserved in organism other than E. coli	-1.60469	0.131494	1.12157	0.246781
BB0316	ispB, cel	octaprenyl-diphosphate synthase	transferase activity	isoprenoid biosynthesis	-1.20074	0.180679	-1.12991	0.0716687
BB0317		LysR-family transcriptional regulator	transcription factor activity	Global Regulatory Functions	-1.2039	0.067719	-1.3733	0.0765249
BB0318	hyuA	putative hydantoin utilization protein A	hydrolase activity		-2.37707	0.008	NA	NA
BB0319	hyuB	hydantoin utilization protein B	catalytic activity		-1.58247	0.03	-1.09566	0.049
BB0320		putative amino acid deaminase	oxidoreductase activity	electron transport	-1.88085	0.108156	-1.08123	0.0455082
BB0321		putative exported protein		Periplasmic/ Exported/ Lipoprotein	-1.54526	0.0035	-1.16327	0.0554668
BB0322	gabD	succinate-semialdehyde dehydrogenase [NADP+]	succinate-semialdehyde dehydrogenase [NAD(P)+] activity	metabolism	-1.90004	0.148403	-1.24408	0.0121132
BB0323	cyaC, HlyC	cyclolysin-activating lysine-acyltransferase	acyltransferase activity	transport	-1.54407	0.0418104	-1.4265	0.0361536
BB0324	cyaA, cya	bifunctional hemolysin-adenylate cyclaseprecursor	adenylate cyclase activity	Periplasmic/ Exported/ Lipoprotein	4.00885	1.63238	-1.86288	0.07405	positive	6.84589	0	2.54263
BB0325	cyaB	cyclolysin secretion ATP-binding protein	ATP-binding cassette (ABC) transporter activity	transport	1.10488	0.546077	-1.38602	0.067888
BB0326	cyaD	cyclolysin secretion protein	protein transporter activity	transport	1.02238	0.376139	-1.71678	0.0739182
BB0327	cyaE	cyclolysin secretion protein	transporter activity	transport	-1.3412	0.142457	-1.49129	0.181412
BB0328	cyaX	probable LysR-family transcriptional regulator	transcription factor activity	Global Regulatory Functions	-1.6223	0.0971245	-1.27261	0.0886115
BB0329		probable extracellular solute-binding protein	transporter activity	transport	NA	NA	-1.13283	0.0355
BB0330	gltJ	glutamate	transporter activity	transport	-1.30036	0.0492161	-1.06775	0.0428962
BB0331	gltK	glutamate	transporter activity	transport	NA	NA	-1.05067	0.1135
BB0332	gltL	glutamate	ATP-binding cassette (ABC) transporter activity	transport	-1.99267	NA	-1.22512	0.006
BB0333		probable aminotransferase	transaminase activity	metabolism	NA	NA	1.55127	NA
BB0334		putative membrane protein		Cell envelope	-1.80042	0.139378	1.06954	0.0793699
BB0335		putative exported protein		Periplasmic/ Exported/ Lipoprotein	-2.27592	0.0862302	1.13173	0.0663769
BB0336		putative acetoacetyl-CoA reductase	acetoacetyl-CoA reductase activity	metabolism	-2.10532	0.0410427	1.19036	0.0322555
BB0337		putative acetolactate synthase large subunit	acetolactate synthase activity		-1.68369	0.0408213	1.01244	0.030527
BB0338		probable GntR-family transcriptional regulator	transcription factor activity	Global Regulatory Functions	-2.49442	0.111544	-1.1543	0.102017
BB0339		hypothetical protein		Unknown proteins, no known homologs	-1.73482	0.0638837	-1.00896	0.0743554
BB0340		hypothetical protein		Unknown proteins, no known homologs	-1.80976	0.0398221	-1.02462	0.0963766
BB0341		probable GntR-family transcriptional regulator	transcription factor activity	Global Regulatory Functions	-1.55362	0.0745997	-1.32571	0.0741181
BB0342		probable Zinc-binding dehydrogenase	alcohol dehydrogenase activity, zinc-dependent	metabolism	-1.40296	0.102694	1.0198	0.0035
BB0343		putative acetyl-CoA synthetase	catalytic activity	metabolism	-1.12623	NA	-1.02533	0.0263397
BB0344		conserved hypothetical protein		Conserved in organism other than E. coli	-1.92883	0.0584211	-1.03848	0.0419573
BB0345		putative membrane protein	transporter activity	transport	-1.82785	0.0723314	-1.10509	0.0755123
BB0346		probable ABC transporter, ATP-binding component	ATP-binding cassette (ABC) transporter activity	transport	-2.17077	0.105191	-1.23511	0.0517277
BB0347		putative exported protein		Periplasmic/ Exported/ Lipoprotein	-2.3269	0.121235	-1.24723	0.0280665
BB0348		putative dioxygenase	oxidoreductase activity, acting on single donors with incorporation of molecular oxygen, incorporation of two atoms of oxygen		-1.85039	0.0437254	-1.06429	0.0857375
BB0349	ilvB	putative acetolactate synthase large subunit	acetolactate synthase activity		-2.34711	0.107162	-1.10923	0.0534338
BB0350		putative mechanosensitive channel protein			-1.69791	0.08278	-1.09658	0.0354786
BB0351		LysR family regulatory protein	transcription factor activity	Global Regulatory Functions	-1.84023	0.0384531	-1.07709	0.0607694
BB0352		CAIB		metabolism	-1.28861	0.520852	2.90584	0.0584699
BB0353		conserved hypothetical protein	citrate (pro-3S)-lyase activity	Conserved in organism other than E. coli	-1.38308	0.344758	1.00305	0.102871
BB0354		GntR family regulatory protein	transcription factor activity	Global Regulatory Functions	-1.38308	0.0574982	1.0297	0.134551
BB0355		conserved hypothetical protein	lyase activity	Conserved in organism other than E. coli	-2.37482	0.156173	-1.12614	0.172538
BB0356		putative dehydratase	lyase activity		-1.81761	NA	-1.16499	0.0963712
BB0357		putative exported protein		Periplasmic/ Exported/ Lipoprotein	-2.36282	0.044984	-1.17964	NA
BB0358		putative exported protein		Periplasmic/ Exported/ Lipoprotein	-2.07405	0.242223	-1.30033	0.3065
BB0359		hypothetical protein	hydrolase activity		-1.8492	0.0547637	-1.03439	0.0999061
BB0360		transcriptional regulator	DNA binding	Global Regulatory Functions	-1.86653	0.0718087	1.36345	0.114422
BB0361	scoB	putative succinyl-CoA:3-ketoacid-coenzyme Atransferase subunit B protein	3-oxoacid CoA-transferase activity	metabolism	-1.60444	0.030547	-1.2138	0.0333479
BB0362	scoA	putative succinyl-CoA:3-ketoacid-coenzyme Atransferase subunit A	CoA-transferase activity	metabolism	-1.61578	0.142256	1.03401	0.0324974
BB0363		LysR family regulatory protein	transcription factor activity	Global Regulatory Functions	-1.75174	0.0526299	-1.02417	0.0935738
BB0364		enoyl-CoA hydratase	isomerase activity	metabolism	-1.64459	0.002	-1.16845	0.017
BB0365		conserved hypothetical protein	phosphogluconate dehydrogenase (decarboxylating) activity	pentose-phosphate shunt	-1.15854	0.2215	-1.05011	0.004
BB0366		putative exported protein		Periplasmic/ Exported/ Lipoprotein	-1.64136	0.141689	1.00279	0.020184
BB0367		branched-chain amino acid transport systempermease	transporter activity	transport	NA	NA	NA	NA
BB0368		branched-chain amino acid transport systempermease	transporter activity	transport	-1.89789	NA	NA	NA
BB0369		ABC transport system ATP-binding protein	ATP-binding cassette (ABC) transporter activity	transport	-2.50311	0.1385	-1.40714	NA
BB0370		ABC transport system ATP-binding protein	ATP-binding cassette (ABC) transporter activity	transport	-1.04707	0.119283	-1.60032	0.0920548
BB0371		putative short chain dehydrogenase	oxidoreductase activity	metabolism	-1.40886	0.0495	-1.24763	0.0145
BB0372		conserved hypothetical protein		Conserved in organism other than E. coli	NA	NA	NA	NA
BB0373		putative short chain dehydrogenase	oxidoreductase activity	metabolism	-1.94808	0.166475	-1.47088	0.0139204
BB0374		NADH:flavin oxidoreductase	oxidoreductase activity	metabolism	-1.30229	0.125198	-1.4512	0.0384737
BB0375		putative exported protein		Periplasmic/ Exported/ Lipoprotein	NA	NA	1.05279	NA
BB0376		putative membrane protein		Cell envelope	-1.77103	0.404934	1.26447	0.161068
BB0377		putative membrane protein		Cell envelope	-6.71677	0.0345	1.71269	0.147
BB0378		sensor kinase protein	two-component sensor molecule activity	signal transduction	NA	NA	1.51371	NA
BB0379		transcriptional regulatory protein	two-component response regulator activity	Global Regulatory Functions	NA	NA	1.06531	0.157109
BB0380		conserved hypothetical protein		Conserved in organism other than E. coli	-2.471	0.193976	1.86929	0.431594
BB0381		hypothetical protein		Unknown proteins, no known homologs	NA	NA	1.1736	NA
BB0382		hypothetical protein		Unknown proteins, no known homologs	-2.77226	0.0415	1.28934	0.106726
BB0383	hemA	glutamyl-tRNA reductase	glutamyl-tRNA reductase activity	translation	-1.24013	0.0312449	-1.03903	0.0149778
BB0384	prfA, sueB, uar	peptide chain release factor 1	translation release factor activity, codon specific	translation	-2.02558	0.0259726	1.23832	0.0124189	negative	-3.93344	0	10.6725
BB0385	hemK	heme biosynthesis protein	protein methyltransferase activity	protein amino acid methylation	-2.01483	0.0408766	1.25838	0.0275
BB0386		conserved hypothetical protein		Conserved in organism other than E. coli	-1.5251	0.106745	1.11497	0.0769842
BB0387		probable flavoprotein			-1.50456	0.0921634	-1.01573	0.0357966
BB0388		putative exported protein		Periplasmic/ Exported/ Lipoprotein	NA	NA	NA	NA
BB0389		4,5-dihydroxyphthalate decarboxylase	4,5-dihydroxyphthalate decarboxylase activity		-1.96348	0.0273145	1.14315	0.015
BB0390		molybdopterin dehydrogenase	oxidoreductase activity	electron transport	-1.48409	0.245401	1.05635	0.0145
BB0391		probable 2Fe-2S ferredoxin	electron transporter activity	metabolism	-1.45649	0.0529146	-1.10333	0.056653
BB0392		probable dehydrogenase	oxidoreductase activity	electron transport	NA	NA	-1.07847	0.0495491
BB0393		conserved hypothetical protein		Conserved in organism other than E. coli	-2.78378	0.15004	-1.30205	0.0938203
BB0394		conserved hypothetical protein		Conserved in organism other than E. coli	-1.64324	0.0867216	-1.1417	0.102284
BB0395		putative exported protein		Periplasmic/ Exported/ Lipoprotein	1.11455	0.352926	-1.54813	0.105294
BB0396		conserved hypothetical protein		Conserved in organism other than E. coli	-1.48435	0.293206	-1.02471	0.173549
BB0397	cysI	putative sulfite reductase	sulfite reductase (ferredoxin) activity	electron transport	-1.44199	0.242254	1.06954	0.225093
BB0398		conserved hypothetical protein		Conserved in organism other than E. coli	-3.12539	0.0624839	-1.60598	0.0214191	negative	-4.53237	0	8.67099
BB0399		putative branched-chain amino acid transportATP-binding ABC transporter	ATP-binding cassette (ABC) transporter activity	transport	-2.24567	0.064089	-1.00025	0.0743644
BB0400		putative branched-chain amino acid transportATP-binding ABC transporter	ATP-binding cassette (ABC) transporter activity	transport	-2.45274	0.0553645	1.33452	0.1435	negative	-3.34559	0	12.7494
BB0401		putative branched-chain amino acid transportpermease	transporter activity	transport	-1.62808	0.158415	-1.09851	0.1052
BB0402		putative branched-chain amino acid transportpermease	transporter activity	transport	-1.45674	0.0656937	-1.10892	0.114266
BB0403		putative LysR-family transcriptional regulator	transcription factor activity	Global Regulatory Functions	1.12064	NA	-1.17192	0.0449453
BB0404		putative branched-chain amino acid bindingprotein			NA	NA	NA	NA
BB0405		putative amidase	amidase activity		NA	NA	-1.14402	0.091
BB0406		putative carbonic anhydrase	carbonate dehydratase activity	carbon utilization	-1.05709	0.0604867	-1.25999	0.0431188
BB0407		putative exported protein		Periplasmic/ Exported/ Lipoprotein	-1.62136	0.0656038	-1.30033	0.0822856
BB0408	psiF	phosphate starvation-inducible proteinprecursor			1.18946	0.12915	-1.50439	0.0467999
BB0409		conserved hypothetical protein		Conserved in organism other than E. coli	-2.33295	0.0768122	-1.27508	0.0475
BB0410	catD2	3-oxoadipate enol-lactone hydrolase	3-oxoadipate enol-lactonase activity		-1.73272	0.193269	-1.11237	0.1705
BB0411		conserved hypothetical protein		Conserved in organism other than E. coli	-1.045	0.138278	-1.06257	0.064169
BB0412	catC2, mmlJ	methylmuconolactone isomerase	muconolactone delta-isomerase activity	aromatic compound metabolism	-2.83799	0.0691596	2.05558	0.0712827	negative	-3.75189	0	11.3056
BB0413	catJ, pcaJ	3-oxoadipate CoA-transferase subunit B	3-oxoadipate CoA-transferase activity	metabolism	-1.53114	0.00878161	-1.06458	0.0419173
BB0414	catI, pcaI	3-oxoadipate CoA-transferase subunit A	3-oxoadipate CoA-transferase activity	metabolism	-1.57232	0.0326613	1.12995	0.0980935
BB0415		probable transcriptional regulator	DNA binding	Global Regulatory Functions	-1.8091	0.107973	1.12487	0.0824712
BB0416		probable short-chain dehydrogenase	oxidoreductase activity	metabolism	-1.98715	0.0503631	1.27817	0.004		-3.31073	0	12.8742
BB0417		short-chain fatty acids transporter	short-chain fatty acid transporter activity	transport	NA	NA	-1.05498	0.148565
BB0418		3-hydroxybutyryl-CoA dehydrogenase	3-hydroxybutyryl-CoA dehydrogenase activity	fatty acid metabolism	-2.1032	0.0800571	-1.31773	0.0461185
BB0419	sphB1	autotransporter subtilisin-like protease	pathogenesis	transport	1.67702	0.655509	-3.21633	0.094757
BB0420	ppc	phosphoenolpyruvate carboxylase	tricarboxylic acid cycle	metabolism	-2.07576	0.0529501	1.02504	0.0847198
BB0421		Conserved hypothetical protein		Conserved in organism other than E. coli	-2.26464	0.0720911	-1.2918	0.0634422
BB0422		putative acetyltransferase	N-acetyltransferase activity		-2.12737	0.0493599	-1.43273	0.0441069
BB0423		putative hydrolase	hydrolase activity		-1.6223	0.110621	-1.0691	0.0988354
BB0424		putative regulatory protein			-1.7628	0.205923	-1.3757	0.0210792
BB0425		putative 2-hydroxyacid dehydrogenase	oxidoreductase activity, acting on the CH-OH group of donors, NAD or NADP as acceptor	L-serine biosynthesis	-1.98794	0.167408	-1.12571	0.053
BB0426		probable extracellular solute-binding protein,family 5	transporter activity	transport	-1.50052	0.0870863	-1.04068	0.0488441
BB0427		putative acetyl esterase	catalytic activity		NA	NA	-1.06717	NA
BB0428		probable transcriptional regulator	transcription factor activity	Global Regulatory Functions	NA	NA	1.19357	0.176656
BB0429	leuA	2-isopropylmalate synthase	2-isopropylmalate synthase activity	metabolism	NA	NA	1.00778	0.0951671
BB0430		probable transcriptional regulator	transcription factor activity	Global Regulatory Functions	-1.28057	0.080111	-1.11583	0.0653011
BB0431	ilvD	dihydroxy-acid dehydratase	dihydroxy-acid dehydratase activity	isoleucine biosynthesis	-1.50276	0.0840422	1.02183	0.0344686
BB0432		conserved hypothetical protein		Conserved in organism other than E. coli	-1.50659	0.103712	-1.37666	0.026566
BB0433		putative 5'(3')-deoxyribonucleotidase	hydrolase activity		-2.11373	0.103455	-1.28047	0.011636
BB0434		putative 2'-5' RNA ligase	ligase activity		-1.56085	0.264968	-1.33695	0.057314
BB0435		putative exported protein	transporter activity	transport	-2.00171	0.23889	-1.77477	0.044
BB0436		putative multidrug-efflux system protein	transporter activity	transport	-1.48633	0.253246	-1.4132	0.0683764
BB0437		HlyD family secretion protein	protein transporter activity	protein secretion	-1.53676	0.259463	-1.4132	0.009
BB0438		LysR family regulatory protein	transcription factor activity	Global Regulatory Functions	-1.23983	0.134904	-1.47676	0.004
BB0439		putative membrane protein		Cell envelope	-2.0118	0.033	1.37597	0.0400389
BB0440		conserved hypothetical protein		Conserved in organism other than E. coli	-1.99464	0.0728292	1.1467	0.00970824
BB0441		putative potassium channel protein	potassium channel activity	potassium ion transport	-2.33241	0.0473013	1.22132	0.0219317	negative	-5.37333	0	6.15592
BB0442		conserved hypothetical protein		Conserved in organism other than E. coli	-2.00879	0.043494	-1.10674	0.0445459
BB0443		probable glutathione S-transferase	transferase activity		-1.71822	0.0282839	-1.11394	0.110434
BB0444		putative exported protein		Periplasmic/ Exported/ Lipoprotein	-3.37529	0.127029	1.73147	0.0095	negative	-3.64782	0	11.6726
BB0445		conserved hypothetical protein		Conserved in organism other than E. coli	-2.41301	0.0476247	1.46497	0.0408779	negative	-4.01618	0	10.3876
BB0446		putative metal-activated pyridoxal enzyme	alanine racemase activity		-1.60367	0.109494	-1.75788	0.0265853
BB0447		probable haloacid dehalogenase	hydrolase activity, acting on acid halide bonds, in C-halide compounds	metabolism	-1.46896	0.118523	-1.44111	0.0454798
BB0448		probable transcriptional regulator	transcription factor activity	Global Regulatory Functions	-2.13143	0.142176	-1.31071	0.0365
BB0449		putative integrase			-1.58396	0.316034	1.0665	0.0335
BB0450		autotransporter		transport	-1.36247	0.0291616	-1.16603	0.022845
BB0450A		hypothetical protein		Unknown proteins, no known homologs	-1.62702	NA	-1.18058	0.104234
BB0451	ecnA1	entericidin A anti-toxin precursor			-1.94751	0.083315	1.0736	0.0329355
BB0452		autotransporter		transport	2.71805	0.759026	-3.94	0.0481923	positive	5.06229	0	6.67972
BB0453		conserved hypothetical protein		Conserved in organism other than E. coli	-1.24984	0.0752633	-1.30248	0.0650594
BB0454		putative exported protein		Periplasmic/ Exported/ Lipoprotein	-1.61526	0.0705	-1.45352	0.0188355
BB0455		putative substrate-CoA ligase	ligase activity	metabolism	-1.74475	0.105598	-1.42961	0.0887759
BB0456		probable transcriptional regulator	DNA binding	regulation of transcription, DNA-dependent	-1.49583	0.0464095	-1.4018	0.0404035
BB0457		probable enoyl-CoA hydratase	isomerase activity	metabolism	-1.34461	0.0601723	-1.49017	0.0855063
BB0458		probable carboxymuconolactone decarboxylase	catalytic activity	aromatic compound metabolism	-1.42584	0.0768911	-1.12379	0.0718476
BB0459		putative exported protein		Periplasmic/ Exported/ Lipoprotein	-1.45535	0.0255	-1.40114	0.0475009
BB0460		zinc-binding dehydrogenase	alcohol dehydrogenase activity, zinc-dependent		1.11238	0.234546	-1.22246	0.0328516
BB0461		conserved hypothetical protein		metabolism	NA	NA	NA	NA
BB0462		LysR-family transcriptional regulator	transcription factor activity	Global Regulatory Functions	NA	NA	-1.66667	NA
BB0463		conserved hypothetical protein	oxidoreductase activity	metabolism	-1.07788	0.235358	-1.07572	0.187654
BB0464		putative dehydratase		metabolism	NA	NA	1.31117	0.0515
BB0465		putative exported protein		Periplasmic/ Exported/ Lipoprotein	NA	NA	NA	NA
BB0466		probable LysR-family transcriptional regulator	transcription factor activity	Global Regulatory Functions	-1.22145	NA	-1.49129	0.1615
BB0467		conserved hypothetical protein		Conserved in organism other than E. coli	-1.56109	0.132596	-1.62007	NA
BB0468		putative molybdopterin oxidoreductase	electron transporter activity	electron transport	NA	NA	NA	NA
BB0469		short-chain fatty acids transporter	short-chain fatty acid transporter activity	transport	1.00666	NA	-1.35613	0.0702029
BB0470		putative GntR-family transcriptional regulator	transcription factor activity	Global Regulatory Functions	-1.30293	0.0847221	-1.37634	0.0571849
BB0471		putative exported protein		Periplasmic/ Exported/ Lipoprotein	-3.9041	0.0962396	1.63274	0.332945	negative	-4.78134	0	7.88728
BB0472	cspA	cold shock protein	DNA binding	Global Regulatory Functions	-2.70005	0.0780003	1.7368	0.238691	negative	-3.24471	0	13.1107
BB0473		probable LysR-family transcriptional regulator	transcription factor activity	Global Regulatory Functions	-2.37707	NA	1.28629	0.161017
BB0474		putative exported protein		Periplasmic/ Exported/ Lipoprotein	NA	NA	-1.1943	0.0586179
BB0475		putative sulfatase	sulfuric ester hydrolase activity	metabolism	NA	NA	-1.0563	0.0025
BB0476		conserved hypothetical protein		Conserved in organism other than E. coli	-1.49361	NA	-1.20342	0.0085
BB0477		conserved hypothetical protein		Conserved in organism other than E. coli	-1.32059	NA	NA	NA
BB0478		conserved hypothetical protein	N-acetylglucosamine-6-phosphate deacetylase activity	N-acetylglucosamine metabolism	-1.65107	0.029	-1.12443	0.043
BB0479		hypothetical protein	ATP binding	transport	-1.76776	0.014	-1.07182	0.002
BB0480		conserved hypothetical protein		Conserved in organism other than E. coli	-1.47846	0.0295	-1.18318	0.0155
BB0481		putative TetR-family transcriptional regulator	transcription factor activity	Global Regulatory Functions	-1.4391	0.0765	-1.14869	0.0285
BB0482		hypothetical protein		Unknown proteins, no known homologs	-3.54299	0.022	1.9731	0.1435
BB0483		conserved hypothetical protein		Conserved in organism other than E. coli	-2.57523	0.157363	1.2264	0.08
BB0484		hypothetical protein		Unknown proteins, no known homologs	-4.92409	0.127339	1.94315	NA
BB0484A		hypothetical protein		Unknown proteins, no known homologs	-8.13511	0.05	NA	NA
BB0485		plasmid-related protein			-4.64864	0.0305	1.98985	0.302
BB0486		hypothetical protein		Unknown proteins, no known homologs	-1.20045	0.053	1.12437	0.0045
BB0487		hypothetical protein		Unknown proteins, no known homologs	NA	NA	-1.41727	NA
BB0488	virB6	plasmid-related membrane protein		conjugation with cellular fusion	NA	NA	NA	NA
BB0489		plasmid-related lipoprotein		Periplasmic/ Exported/ Lipoprotein	-4.29701	NA	NA	NA
BB0490		putative membrane protein		Cell envelope	NA	NA	NA	NA
BB0491	virB5	plasmid-related exported protein		Periplasmic/ Exported/ Lipoprotein	NA	NA	NA	NA
BB0492		hypothetical protein		Unknown proteins, no known homologs	NA	NA	NA	NA
BB0493	virD2	plasmid-related protein			-3.9155	0.043	1.35939	NA
BB0494		hypothetical 20.3 kDa protein, plasmid-related protein	DNA binding	regulation of transcription, DNA-dependent	-2.22161	0.381384	1.05584	NA
BB0495		hypothetical protein		Unknown proteins, no known homologs	NA	NA	1.25685	NA
BB0496		hypothetical protein	hydrolase activity		-2.80709	0.081617	1.8066	0.1015	negative	-3.88698	0	10.8336
BB0497		hypothetical protein	ATP-binding cassette (ABC) transporter activity	transport	NA	NA	NA	NA
BB0498		hypothetical protein		Unknown proteins, no known homologs	NA	NA	1.76396	0.0475
BB0499		hypothetical protein		Unknown proteins, no known homologs	-2.17547	0.0509161	-1.24329	0.0456241	negative	-3.99172	0	10.4716
BB0500		putative integrase			-1.99172	0.0410032	-1.02604	0.0511811
BB0501	htpG	heat shock protein	heat shock protein activity	protein folding	1.87091	0.510432	-1.97296	0.0074652
BB0502		probable glutathione S-transferase	transferase activity		-1.55074	0.0606535	-1.25999	0.0196781
BB0503	ampD	N-acetylmuramoyl-L-alanine amidase	N-acetylmuramoyl-L-alanine amidase activity	peptidoglycan catabolism	-1.59806	0.0364121	-1.19793	0.0286571
BB0504		putative exported protein		Periplasmic/ Exported/ Lipoprotein	-1.52835	0.0823261	-1.00254	0.0569803
BB0505		putative membrane protein		cytochrome c oxidase biogenesis	-1.80391	0.0384075	-1.19249	0.035088
BB0506	ffh	signal recognition particle protein	RNA binding	SRP-dependent cotranslational membrane targeting	-1.56376	0.0639555	-1.32839	0.00847054
BB0507		putative membrane protein		cell wall catabolism	1.40408	0.462559	-1.20416	0.0215677
BB0508		conserved hypothetical protein		sulfur metabolism	-1.34641	0.0695901	1.12665	0.0999103
BB0509		prolyl iminopeptidase	prolyl aminopeptidase activity		-2.03378	0.0368008	1.08883	0.0827542
BB0510		putative methyltransferase	S-adenosylmethionine-dependent methyltransferase activity		-1.50411	0.129573	1.01091	0.105034
BB0511		LysR family regulatoy protein	transcription factor activity	Global Regulatory Functions	-1.65204	0.0468632	-1.05235	0.0438558
BB0512		conserved hypothetical protein		metabolism	-2.32174	0.102763	1.19467	0.156982
BB0513		putative hydroxymethylglutaryl-CoA lyase(pseudogene)			-3.7744	0.0169411	1.0368	0.0612337	negative	-3.95463	0	10.5993
BB0514		putative exported protein		Periplasmic/ Exported/ Lipoprotein	1.12171	0.0533839	-2.06067	0.0160052
BB0515		conserved hypothetical protein		Conserved in organism other than E. coli	-2.52638	0.0477226	-1.27591	0.002	negative	-3.35781	0	12.7056
BB0516		putative transcriptional regulator	DNA binding	regulation of transcription, DNA-dependent	-1.39235	0.138556	-1.0852	0.271719
BB0517		putative dioxygenase subunit	iron ion binding	electron transport	1.42655	0.273378	-1.31217	0.151392
BB0518		putative hydroxylase	catalytic activity	electron transport	1.46315	0.210519	-1.75579	0.040696
BB0519		putative exported protein		transport	-1.07425	0.114436	-1.70121	0.081
BB0520		putative membrane protein		Cell envelope	1.08215	0.27508	-1.089	0.1005
BB0521		integral membrane protein			NA	NA	-1.53427	0.172
BB0522		oxidoreductase	electron transporter activity	electron transport	1.08861	0.101938	-1.51655	0.118598
BB0523		putative ferredoxin	oxidoreductase activity	metabolism	-1.43828	0.122945	-1.86025	0.0742748
BB0524		conserved hypothetical protein	hydrolase activity, acting on glycosyl bonds	Conserved in organism other than E. coli	-1.3791	0.136236	-1.54389	0.0784889
BB0525		conserved hypothetical protein		Conserved in organism other than E. coli	-1.3697	0.072903	-1.5567	0.0667725
BB0526		putative phage-related protein		Laterally acquired elements	-1.74384	0.0195021	-1.20122	0.038
BB0527		conserved hypothetical protein		Conserved in organism other than E. coli	-2.28315	0.0867911	-1.46577	0.013
BB0528		putative DNA-binding protein	DNA binding		-1.59375	0.0577332	-1.66667	0.0142887
BB0529		hypothetical protein		Unknown proteins, no known homologs	-1.51728	0.0675	-1.45173	0.0045
BB0530		regulatory protein	transcription factor activity	Global Regulatory Functions	-1.22832	0.138743	-1.40714	0.00790569
BB0531		putative exported protein		Periplasmic/ Exported/ Lipoprotein	-1.5517	0.017	-1.28758	0.016
BB0532		putative acyl-CoA synthetase			1.17911	NA	NA	NA
BB0533		enoyl-CoA hydratase	isomerase activity	metabolism	NA	NA	-1.20711	NA
BB0534		putative exported protein		Periplasmic/ Exported/ Lipoprotein	-2.08437	NA	-1.05385	0.159385
BB0535		hypothetical protein		Unknown proteins, no known homologs	-1.60983	NA	NA	NA
BB0536		conserved hypothetical protein		Conserved in organism other than E. coli	-1.3412	0.0015	-1.30076	0.0264366
BB0537		putative sulfurtransferase	transferase activity	metabolism	-1.53887	0.0560833	-1.16845	0.110048
BB0538		LysR family regulatory protein	transcription factor activity	Global Regulatory Functions	NA	NA	NA	NA
BB0539		thiamine pyrophosphate enzyme		metabolism	-1.54029	0.504	-1.4241	0.026965
BB0540		conserved hypothetical protein		metabolism	NA	NA	NA	NA
BB0541		enoyl-CoA hydratase	isomerase activity	metabolism	NA	NA	NA	NA
BB0542		putative exported protein		Periplasmic/ Exported/ Lipoprotein	-1.36274	0.17842	-1.38863	0.0363608
BB0543		putative transcriptional regulator	DNA binding	regulation of transcription, DNA-dependent	-1.28663	0.3225	-1.33741	0.0745
BB0544		putative exported protein		Periplasmic/ Exported/ Lipoprotein	NA	NA	NA	NA
BB0545		conserved hypothetical protein		Conserved in organism other than E. coli	NA	NA	-1.78766	NA
BB0546		conserved hypothetical protein		Conserved in organism other than E. coli	-1.99742	0.002	-1.32437	0.0477657
BB0547		putative ligase	ligase activity	metabolism	NA	NA	NA	NA
BB0548		LacI family regulatory protein	transcription factor activity	Global Regulatory Functions	-2.61645	0.0795	-1.44006	0.009
BB0549		putative membrane protein		Cell envelope	-3.79148	NA	1.50812	0.0225
BB0550		hypothetical protein		Unknown proteins, no known homologs	-1.45409	0.1785	-1.3081	0.015
BB0551		conserved hypothetical protein		Conserved in organism other than E. coli	-1.07828	0.151788	-1.51655	0.0294972
BB0552		putative Zinc-binding dehydrogenase	alcohol dehydrogenase activity, zinc-dependent		-1.57503	0.005	-1.5451	0.0124532
BB0553		conserved hypothetical protein	catalytic activity	metabolism	-1.46745	0.059	-1.58615	0.0503322
BB0554		putative carboxymuconolactone decarboxylase	catalytic activity	aromatic compound metabolism	-1.50637	0.0265	-1.29776	0.012
BB0555		enoyl-CoA hydratase	isomerase activity	metabolism	-1.32844	0.1835	-1.18532	0.0191398
BB0556		iron-containing alcohol dehydrogenase	iron ion binding	metabolism	-1.81564	0.112532	1.18782	0.113105
BB0557		CaiB		metabolism	NA	NA	NA	NA
BB0558		putative racemase		metabolism	NA	NA	NA	NA
BB0559		putative exported protein		Periplasmic/ Exported/ Lipoprotein	NA	NA	NA	NA
BB0560		LysR family regulatory protein	transcription factor activity	Global Regulatory Functions	-2.12872	0.0800348	1.32513	0.0585069	negative	-3.21879	0	13.2036
BB0561		conserved hypothetical protein		Conserved in organism other than E. coli	1.00308	0.122	NA	NA
BB0562		putative exported protein		Periplasmic/ Exported/ Lipoprotein	NA	NA	NA	NA
BB0563		acyl-CoA dehydrogenase	acyl-CoA dehydrogenase activity	electron transport	NA	NA	NA	NA
BB0564		putative exported protein		Periplasmic/ Exported/ Lipoprotein	1.00368	NA	NA	NA
BB0565		conserved hypothetical protein		Conserved in organism other than E. coli	NA	NA	NA	NA
BB0566		aconitase family protein	lyase activity	metabolism	NA	NA	NA	NA
BB0567		LysR family regulatory protein	transcription factor activity	Global Regulatory Functions	-2.82365	0.0495	1.44467	NA
BB0568		putative exported protein		Periplasmic/ Exported/ Lipoprotein	NA	NA	NA	NA
BB0569		putative membrane protein		Cell envelope	1.59562	0.256225	1.0368	0.189128
BB0570		putative hydrolase	hydrolase activity		-1.769	0.0633865	1.05685	0.0760296
BB0571		putative branched-chain amino acid transportATP-binding protein	ATP-binding cassette (ABC) transporter activity	transport	NA	NA	NA	NA
BB0572		ABC transporter ATP-binding protein	ATP-binding cassette (ABC) transporter activity	transport	NA	NA	NA	NA
BB0573		putative branched-chain amino acid transportsystem permease	transporter activity	transport	NA	NA	NA	NA
BB0574		putative branched-chain amino acid transportsystem permease protein	transporter activity	transport	NA	NA	-2.03934	NA
BB0575					NA	NA	NA	NA
BB0576		TetR family regulatory protein	transcription factor activity	Global Regulatory Functions	-1.42746	0.044	-1.809	0.0115
BB0577		hypothetical protein		Unknown proteins, no known homologs	-1.36025	0.022	-1.84803	0.013
BB0578		conserved hypothetical protein		Conserved in organism other than E. coli	-1.33267	0.0065	-1.49924	0.014
BB0579		conserved hypothetical protein	racemase and epimerase activity, acting on amino acids and derivatives	metabolism	-1.25578	0.0025	-1.41523	0.007
BB0580		short chain dehydrogenase	oxidoreductase activity	metabolism	NA	NA	NA	NA
BB0581		acyl-CoA dehydrogenase	acyl-CoA dehydrogenase activity	metabolism	NA	NA	-1.56847	NA
BB0582		short chain dehydrogenase	oxidoreductase activity	metabolism	NA	NA	-1.27261	NA
BB0583		putative ligase	ligase activity	metabolism	-1.49896	0.469	-1.50765	0.0248819
BB0584		hypothetical protein		Unknown proteins, no known homologs	NA	NA	-1.48343	NA
BB0585		enoyl-CoA hydratase	isomerase activity	metabolism	NA	NA	-1.51655	0.0115
BB0586		putative exported protein		Periplasmic/ Exported/ Lipoprotein	NA	NA	NA	NA
BB0587		conserved hypothetical protein		Conserved in organism other than E. coli	-1.75941	0.4085	-1.32973	0.101166
BB0588		conserved hypothetical protein		Conserved in organism other than E. coli	1.56101	NA	NA	NA
BB0589		conserved hypothetical protein	citrate (pro-3S)-lyase activity	Conserved in organism other than E. coli	NA	NA	1.37665	NA
BB0590		conserved hypothetical protein	oxidoreductase activity	metabolism	-1.76729	0.117458	-1.358	0.0312214
BB0591		acyl-CoA dehydrogenase	acyl-CoA dehydrogenase activity	metabolism	1.05917	NA	NA	NA
BB0592		CaiB		metabolism	-1.9049	0.05284	1.0665	0.10009
BB0593		CaiB		metabolism	NA	NA	1.08223	0.0450777
BB0594		putative exported protein		Periplasmic/ Exported/ Lipoprotein	NA	NA	1.22538	NA
BB0595		hypothetical protein		Unknown proteins, no known homologs	NA	NA	-1.14005	0.108
BB0596		nitroreductase family protein	oxidoreductase activity	electron transport	-1.21174	NA	-1.1643	0.059
BB0597		enoyl-CoA hydratase	isomerase activity	metabolism	-1.50468	0.208792	1.03046	0.014
BB0598		extracellular ligand binding protein			-1.01015	NA	-1.04602	0.0921762
BB0599		putative branched-chain amino acid transportsystem permease protein	transporter activity	transport	-1.61487	0.202413	-1.93137	0.0337071
BB0600	cysH	phosphoadenosine phosphosulfate reductase	phosphoadenylyl-sulfate reductase (thioredoxin) activity	sulfate assimilation, phosphoadenylyl sulfate reduction by phosphoadenylyl-sulfate reductase (thioredoxin)	-1.36859	0.0655	-1.41016	0.1125
BB0601		ABC transport system ATP-binding protein	ATP-binding cassette (ABC) transporter activity	transport	-2.01471	0.141721	-1.34471	0.0715
BB0602		ABC transport system ATP-binding protein	ATP-binding cassette (ABC) transporter activity	transport	-1.64338	0.167263	-1.42444	0.0225
BB0603		NADH:flavin oxidoreductase	oxidoreductase activity	metabolism	-1.49595	0.0653228	-1.32571	0.025
BB0604		short chain dehydrogenase	oxidoreductase activity	metabolism	2.40577	0.989188	1.17259	0.0148436	positive	4.94363	0	7.02209
BB0605		putative exported protein		Periplasmic/ Exported/ Lipoprotein	NA	NA	-1.17262	NA
BB0606		acetyl-CoA hydrolase	acetyl-CoA metabolism	metabolism	NA	NA	-1.0854	0.0255
BB0607		AMP-binding enzyme	catalytic activity	metabolism	NA	NA	-1.22436	0.0875
BB0608		IclR family regulatory protein	DNA binding	regulation of transcription, DNA-dependent	-2.42348	0.0635	-1.12443	0.09
BB0609		IclR family regulatory protein	DNA binding	regulation of transcription, DNA-dependent	-2.18094	0.0907263	-1.34563	0.0771956
BB0610		putative pyruvate carboxylase	gluconeogenesis	metabolism	-2.29252	0.013	NA	NA
BB0611		acyl-CoA dehydrogenase	acyl-CoA dehydrogenase activity	electron transport	-1.14901	0.22431	-1.65199	0.0754701
BB0612		putative enoyl-CoA hydratase	oxidoreductase activity	metabolism	NA	NA	-2.22851	NA
BB0613		putative short chain dehydrogenase	oxidoreductase activity	metabolism	-2.46446	NA	-1.33288	NA
BB0614		putative thiolase			-1.49184	0.143618	-1.16087	0.0745
BB0615		AMP-binding enzyme	catalytic activity	metabolism	-1.80326	0.0540319	NA	NA
BB0616		IclR family regulatory protein	DNA binding	regulation of transcription, DNA-dependent	NA	NA	NA	NA
BB0617		CaiB		metabolism	-1.45851	NA	1.09543	NA
BB0618		LysR family regulatory protein	transcription factor activity	Global Regulatory Functions	NA	NA	-1.38343	0.068
BB0619		putative acyl-CoA dehydrogenase	acyl-CoA dehydrogenase activity	electron transport	-1.68821	0.0673556	1.02716	0.0291072
BB0620	etfB, etfS	electron transfer flavoprotein beta-subunit	electron transporter activity	electron transport	-1.71441	0.0373865	-1.20785	0.0125
BB0621	etfA, etfL	electron transfer flavoprotein alpha-subunit	electron transporter activity	electron transport	-1.54147	0.0413734	-1.27632	0.0399841
BB0622		conserved hypothetical protein		Conserved in organism other than E. coli	-2.07149	0.145788	-1.24447	0.0595
BB0623		LysR-family transcriptional regulator	transcription factor activity	Global Regulatory Functions	-1.66006	0.0633044	-1.29904	0.0085574
BB0624		conserved hypothetical protein		Conserved in organism other than E. coli	-3.1471	0.0175	NA	NA
BB0625		putative exported protein		Periplasmic/ Exported/ Lipoprotein	-1.57134	0.0595	-1.46142	0.013
BB0626		putative exported protein		Periplasmic/ Exported/ Lipoprotein	-2.69535	0.0537794	-1.40614	0.0105
BB0627		conserved hypothetical protein	transcription factor activity	Global Regulatory Functions	1.00776	0.272619	-1.42136	0.002
BB0628		conserved hypothetical protein		Conserved in organism other than E. coli	-1.86411	NA	NA	NA
BB0629		putative enoyl-CoA hydratase	catalytic activity	metabolism	NA	NA	NA	NA
BB0630		nitroreductase family protein	oxidoreductase activity	electron transport	-2.40091	NA	-1.05348	0.0170587
BB0631		TetR family transcriptional regulator	transcription factor activity	Global Regulatory Functions	-1.00954	0.0983331	-1.76523	0.0347371
BB0632		putative hydroxymethylglutaryl-CoA lyase	lyase activity		NA	NA	-1.29947	0.058
BB0633		putative enoyl-CoA hydratase	isomerase activity	metabolism	NA	NA	NA	NA
BB0634		CAIB		metabolism	NA	NA	NA	NA
BB0635		putative lipoprotein		Periplasmic/ Exported/ Lipoprotein	NA	NA	-1.18961	NA
BB0636		iron-containing alcohol dehydrogenase	iron ion binding	metabolism	NA	NA	-1.3365	NA
BB0637		enoyl-CoA hydratase	isomerase activity	metabolism	NA	NA	1.28426	NA
BB0638		putative amidase	amidase activity		-1.29608	0.115249	-1.33243	0.0603467
BB0639		conserved hypothetical protein		Conserved in organism other than E. coli	-1.84293	0.0707642	-1.05235	0.0173397
BB0640		hypothetical protein		Unknown proteins, no known homologs	NA	NA	NA	NA
BB0641		putative aldehyde dehydrogenase	oxidoreductase activity	metabolism	NA	NA	1.64264	NA
BB0642		NADPH-dependent FMN reductase		metabolism	-1.49095	0.199164	-1.1543	0.0688872
BB0643		putative transport system permease protein	transporter activity	transport	-1.17383	0.131096	-1.09475	0.0396198
BB0644		ABC transporter ATP-binding protein	ATP-binding cassette (ABC) transporter activity	transport	-1.65474	0.104399	-1.23511	0.0551883
BB0645		putative exported protein		Periplasmic/ Exported/ Lipoprotein	-2.12804	0.0145	NA	NA
BB0646		luciferase-like monooxygenase	monooxygenase activity		NA	NA	1.08426	0.097
BB0647		IclR family transcriptional regulator	DNA binding	regulation of transcription, DNA-dependent	1.14381	0.17561	1.35305	0.2016
BB0648		probable regulator	transcription factor activity	Global Regulatory Functions	-1.81106	0.158908	-1.25238	0.0714825
BB0649		probable short chain dehydrogenase	oxidoreductase activity	metabolism	-1.61177	0.312288	-1.31684	0.012
BB0650		putative exported protein		Periplasmic/ Exported/ Lipoprotein	-2.15773	0.179357	-1.23821	0.0115
BB0651		aldehyde dehydrogenase	aldehyde dehydrogenase (NAD) activity	metabolism	-1.72766	0.1332	-1.25159	0.0170978
BB0652		putative exported protein		Periplasmic/ Exported/ Lipoprotein	NA	NA	NA	NA
BB0653		putative 3-hydroxyisobutyrate dehydrogenase	phosphogluconate dehydrogenase (decarboxylating) activity	metabolism	NA	NA	NA	NA
BB0654		LysR-family transcriptional regulator	transcription factor activity	Global Regulatory Functions	NA	NA	NA	NA
BB0655		putative transcriptional regulator	DNA binding	regulation of transcription, DNA-dependent	-2.38893	0.0185	1.19645	0.1045
BB0656		probable acyl-CoA dehydrogenase	acyl-CoA dehydrogenase activity	electron transport	NA	NA	NA	NA
BB0657		putative acetyl-CoA synthetase	catalytic activity	metabolism	-1.04024	0.056	-1.44534	0.0105
BB0658		conserved hypothetical protein		Conserved in organism other than E. coli	-1.56474	NA	-1.41421	0.0355
BB0659		conserved hypothetical protein		Conserved in organism other than E. coli	NA	NA	NA	NA
BB0660		putative exported protein		Periplasmic/ Exported/ Lipoprotein	-1.42473	0.0350604	-1.16522	0.0707492
BB0661		putative enoyl-CoA hydratase	isomerase activity	metabolism	1.14799	0.168629	-1.50267	0.0412765
BB0662		conserved hypothetical protein		Conserved in organism other than E. coli	NA	NA	NA	NA
BB0663	gcdH	glutaryl-CoA dehydrogenase	glutaryl-CoA dehydrogenase activity	electron transport	NA	NA	NA	NA
BB0664		probable enoyl CoA hydratase	catalytic activity	metabolism	NA	NA	NA	NA
BB0665		probable thiolase			NA	NA	-1.03575	0.026
BB0666		putative exported protein		Periplasmic/ Exported/ Lipoprotein	NA	NA	1.03249	NA
BB0667		putative acetyl-CoA synthetase			NA	NA	NA	NA
BB0668		conserved hypothetical protein		Conserved in organism other than E. coli	-1.17027	NA	-1.3844	0.0465
BB0669		LysR-family transcriptional regulator	transcription factor activity	regulation of transcription, DNA-dependent	-1.00711	NA	NA	NA
BB0670		putative hydrolase	hydrolase activity		NA	NA	-1.25718	0.0935
BB0671		conserved hypothetical protein		Conserved in organism other than E. coli	NA	NA	-1.65685	0.0025
BB0672		conserved hypothetical protein		Conserved in organism other than E. coli	-1.42321	0.0865	-1.44217	0.094
BB0673	gst	glutathione S-transferase	glutathione transferase activity		-1.57651	0.015	-1.46796	0.042
BB0674		putative exported protein		Periplasmic/ Exported/ Lipoprotein	-1.65924	0.0611078	-1.38213	0.0165563
BB0675		putative exported protein		Periplasmic/ Exported/ Lipoprotein	-1.50671	0.0598462	-1.27756	0.026366
BB0676		putative GntR-family transcriptional regulator	transcription factor activity	Global Regulatory Functions	-1.54265	0.265179	NA	NA
BB0677		probable aldehyde dehydrogenase	oxidoreductase activity	metabolism	NA	NA	-1.47015	NA
BB0678	metC	cystathionine beta-lyase	amino acid metabolism	metabolism	NA	NA	-1.31861	NA
BB0679		conserved hypothetical protein		Conserved in organism other than E. coli	-3.88824	NA	-1.21755	NA
BB0680		putative exported protein		Periplasmic/ Exported/ Lipoprotein	NA	NA	1.0203	0.17
BB0681		conserved hypothetical protein		Conserved in organism other than E. coli	NA	NA	NA	NA
BB0682		conserved hypothetical protein		Conserved in organism other than E. coli	-3.32947	0.101239	-1.19394	NA
BB0683		conserved hypothetical protein		Conserved in organism other than E. coli	NA	NA	-1.0202	0.1115
BB0684		hypothetical protein		Unknown proteins, no known homologs	-1.78613	0.103734	-1.03331	0.0488269
BB0685		transcriptional regulator	DNA binding	regulation of transcription, DNA-dependent	-1.43213	0.11057	-1.07533	0.096
BB0686	dapA	dihydrodipicolinate synthase	dihydrodipicolinate synthase activity		-1.36887	0.183427	-1.18247	0.161084
BB0687	aatB	aspartate aminotransferase	aspartate transaminase activity	biosynthesis	-1.71178	NA	1.24873	NA
BB0688		probable solute-binding periplasmic protein	transporter activity	transport	-1.08258	NA	1.13553	0.1075
BB0689		putative permease component of ABC transporter	transporter activity	transport	NA	NA	NA	NA
BB0690		putative ATP-binding component of ABCtransporter	ATP-binding cassette (ABC) transporter activity	transport	NA	NA	1.03959	NA
BB0691		putative peptidase	metallopeptidase activity	proteolysis and peptidolysis	-1.51888	0.0603996	1.17234	0.0258179
BB0692		probable transcriptional regulator	DNA binding	regulation of transcription, DNA-dependent	-2.1568	0.0851156	NA	NA
BB0693	amaB	N-carbamoyl-L-amino acid amidohydrolase	metallopeptidase activity	proteolysis and peptidolysis	NA	NA	-1.41219	0.0405
BB0694		probable amidase	amidase activity		-2.37876	0.0565	-1.47235	0.0281099
BB0695		putative polysaccharide deacetylase	hydrolase activity, acting on carbon-nitrogen (but not peptide) bonds	carbohydrate metabolism	NA	NA	-1.23279	0.148
BB0696	allA, glxA2	putative ureidoglycolate hydrolase	ureidoglycolate hydrolase activity	allantoin catabolism	NA	NA	NA	NA
BB0697		putative membrane protein		Cell envelope	-1.98382	0.270854	-1.24212	0.001
BB0698		putative membrane protein		Cell envelope	-1.91014	0.0701183	-1.07298	0.090575
BB0699		putative extracellular solute-binding protein		transport	-1.63337	0.159775	-1.25079	0.0385
BB0700		putative LysR-family transcriptional regulator	transcription factor activity	Global Regulatory Functions	-1.29658	0.0518676	-1.04676	0.031
BB0701		putative exported protein		Periplasmic/ Exported/ Lipoprotein	NA	NA	1.00558	0.0355
BB0702		putative GntR-family transcriptional regulator	transcription factor activity	Global Regulatory Functions	NA	NA	-1.30004	0.119356
BB0703		conserved hypothetical protein		Conserved in organism other than E. coli	NA	NA	-1.1534	NA
BB0704		putative membrane protein		Cell envelope	NA	NA	1.05584	NA
BB0705		putative membrane protein		Cell envelope	-1.68172	0.4325	-1.25745	0.02627
BB0706		extracellular solute-binding protein		transport	-2.28315	0.039	NA	NA
BB0707		probable GntR-family transcriptional regulator	transcription factor activity	Global Regulatory Functions	-2.31469	0.0731653	-1.07886	0.0641275
BB0708	glyA	serine hydroxymethyltransferase	glycine hydroxymethyltransferase activity	glycine metabolism	-2.00939	0.164218	-1.55179	0.0268557
BB0709	benE	benzoate membrane transport protein			-1.2822	0.758	NA	NA
BB0710		probable oxidoreductase	electron transporter activity	electron transport	-1.74687	0.0577522	1.11218	0.0301178
BB0711		putative aldehyde dehydrogenase	oxidoreductase activity	electron transport	-1.72381	0.147017	1.1797	0.043
BB0712		putative LysR-family transcriptional regulator	transcription factor activity	Global Regulatory Functions	-1.47521	0.0446236	1.05787	0.110457
BB0713		putative transcriptional regulator	DNA binding	regulation of transcription, DNA-dependent	NA	NA	1.06497	0.065
BB0714	hmgL	3-hydroxy-3-methylglutaryl-CoA lyase	hydroxymethylglutaryl-CoA lyase activity		NA	NA	1.75736	NA
BB0715		conserved hypothetical protein		metabolism	1.21164	0.1875	-1.56598	0.0910641
BB0716		putative isochorismatase	catalytic activity	metabolism	-2.03997	0.0175	-1.45926	0.0317674
BB0717		putative exported protein		Periplasmic/ Exported/ Lipoprotein	-2.26566	0.0969487	1.03858	0.0306077
BB0718	bcpA	carboxyvinyl-carboxyphosphonatephosphorylmutase	carboxyvinyl-carboxyphosphonate phosphorylmutase activity	metabolism	-2.47721	0.0975	-1.41931	NA
BB0719		putative ABC transporter periplasmicsolute-binding protein		transport	-1.90436	0.041	-1.24526	0.009
BB0720		putative membrane protein		Cell envelope	-1.21805	0.104335	-1.47345	0.0201763
BB0721		putative membrane protein		Cell envelope	-1.85997	0.0263122	-1.37666	0.0015
BB0722		conserved hypothetical protein		Conserved in organism other than E. coli	-2.30619	0.120989	-1.22895	0.0465233
BB0723		conserved hypothetical protein		Conserved in organism other than E. coli	-2.42172	0.13269	1.10102	0.0255
BB0724		conserved hypothetical protein		Conserved in organism other than E. coli	NA	NA	-1.22741	0.0385
BB0725		putative transcriptional regulator	DNA binding	Global Regulatory Functions	1.31338	0.308346	-1.12027	0.0953366
BB0726		putative exported protein		Periplasmic/ Exported/ Lipoprotein	-1.34822	NA	-1.17332	0.0125
BB0727		electron transfer component of a dioxygenasesystem	electron transporter activity	electron transport	-1.49851	0.271868	-1.39321	0.023
BB0728	hcaE	hydroxylating alpha subunit of a dioxygenasesystem	iron ion binding	electron transport	NA	NA	-1.17262	0.046
BB0729		putative short chain dehydrogenase	oxidoreductase activity	metabolism	NA	NA	NA	NA
BB0730		hydroxylating beta subunit of a dioxygenasesystem	oxidoreductase activity, acting on single donors with incorporation of molecular oxygen, incorporation of two atoms of oxygen	electron transport	-2.09348	0.0655	-1.43796	NA
BB0731		hypothetical protein		Unknown proteins, no known homologs	-1.75449	0.126109	-1.05611	0.00902466
BB0732	cadA	FAD-monooxygenase	monooxygenase activity	electron transport	NA	NA	NA	NA
BB0733		putative exported protein		Periplasmic/ Exported/ Lipoprotein	-2.41533	0.128139	1.22183	0.114569
BB0734	hpaG	putative fumarylacetoacetate hydrolase familyprotein	hydrolase activity	metabolism	-2.52005	NA	-1.19539	0.114692
BB0735		putative fumarylacetoacetate hydrolase familyprotein	hydrolase activity	metabolism	-1.33373	0.3195	-1.13643	0.0576937
BB0736	hpaE	5-carboxymethyl-2-hydroxymuconate semialdehydedehydrogenase	oxidoreductase activity	metabolism	-1.27764	0.0540442	-1.21119	0.0486165
BB0737	hpaD	homoprotocatechuate 2,3-dioxygenase	3,4-dihydroxyphenylacetate 2,3-dioxygenase activity	electron transport	NA	NA	-1.09384	0.0195
BB0738	hpaF	5-carboxymethyl-2-hydroxymuconatedelta-isomerase	5-carboxymethyl-2-hydroxymuconate delta-isomerase activity	aromatic compound metabolism	-1.23405	0.289	-1.09974	0.0846686
BB0739	hpcG	2-oxo-hepta-3-ene-1,7-dioic acid hydratase	lyase activity	aromatic compound metabolism	NA	NA	NA	NA
BB0740	hpaI, hpcH	2,4-dihydroxyhept-2-ene-1,7-dioic acid aldolase	aldolase activity	metabolism	-1.34713	0.131894	-1.24251	0.0154616
BB0741		LysR-family transcriptional regulator	transcription factor activity	Global Regulatory Functions	-1.73446	0.1097	1.04797	0.0258888
BB0742		putative exported protein		Periplasmic/ Exported/ Lipoprotein	-1.66584	0.212613	-1.25318	0.0882723
BB0743		Thiamine pyrophosphate enzyme		metabolism	-2.06702	0.0978224	-1.32794	0.0575129
BB0744		putative aldehyde dehydrogenase	oxidoreductase activity	metabolism	-1.65107	0.041	-1.34471	0.0065
BB0745		putative lipase	catalytic activity		-1.4651	0.0492486	-1.22019	0.032219
BB0746		putative transcriptional regulator	DNA binding		-2.02273	0.0800478	-1.21343	0.0375952
BB0747		putative exported protei		Periplasmic/ Exported/ Lipoprotein	-1.79234	0.0753529	-1.08034	0.0901779
BB0748		putative exported protein		Periplasmic/ Exported/ Lipoprotein	-2.07469	0.19505	1.02132	0.0683032
BB0749		putative lipoprotein		Periplasmic/ Exported/ Lipoprotein	NA	NA	1.03147	0.0568302
BB0750		probable enoyl-CoA hydratase	enoyl-CoA hydratase activity	metabolism	NA	NA	-1.06142	NA
BB0751		probable short-chain dehydrogenase	oxidoreductase activity	metabolism	1.13317	NA	1.05482	NA
BB0752		conserved hypothetical protein		metabolism	-2.4358	NA	NA	NA
BB0753		coenzyme A ligase	ligase activity	metabolism	NA	NA	NA	NA
BB0754		TetR-family transcriptional regulator	transcription factor activity	Global Regulatory Functions	-1.79234	NA	-1.22158	0.143486
BB0755		putative acyl-CoA dehyrdogenase	acyl-CoA dehydrogenase activity	electron transport	NA	NA	NA	NA
BB0756		branched-chain amino acid ABC transporter,permease protein	transporter activity	transport	NA	NA	NA	NA
BB0757		branched-chain amino acid ABC transporter,permease protein	transporter activity	transport	NA	NA	NA	NA
BB0758		branched-chain amino acid ABC transporter,ATP-binding protein	ATP-binding cassette (ABC) transporter activity	transport	NA	NA	NA	NA
BB0759		putative ABC transporter ATP-binding protein	ATP-binding cassette (ABC) transporter activity	transport	-1.51021	0.200907	1.11751	0.0535605
BB0761		branched-chain amino acid ABC transporter,binding protein		transport	NA	NA	NA	NA
BB0762		short chain dehydrogenase	3-hydroxyacyl-CoA dehydrogenase activity	metabolism	-1.42301	0.130522	1.02208	0.119708
BB0763		enoyl CoA dehydratase	lyase activity	metabolism	NA	NA	-1.68376	NA
BB0764		conserved hypothetical protein		Conserved in organism other than E. coli	-2.20215	NA	-1.17262	0.054
BB0765		putative thiolase			-2.47173	0.017	NA	NA
BB0766		putative hydratase	oxidoreductase activity	metabolism	NA	NA	NA	NA
BB0767		hypothetical protein Xcc2124		Unknown proteins, no known homologs	-2.44766	0.135777	-1.37282	0.0441673
BB0768		putative exported protein		Periplasmic/ Exported/ Lipoprotein	NA	NA	NA	NA
BB0769		conserved hypothetical protein		Conserved in organism other than E. coli	-1.3564	0.2075	-1.19442	0.126768
BB0770		probable transcriptional regulator	DNA binding	regulation of transcription, DNA-dependent	-1.47618	0.0253093	-1.24526	0.100281
BB0771		putative FAD dependent oxidoreductase	oxidoreductase activity	electron transport	-1.41301	0.001	-1.58679	0.0572995
BB0772		putative dipeptidase	membrane dipeptidase activity	proteolysis and peptidolysis	-1.46191	0.065692	-1.07709	0.0015
BB0773		putative exported protein		Periplasmic/ Exported/ Lipoprotein	-1.25813	0.07	-1.1507	0.0286182
BB0774		hypothetical protein		Unknown proteins, no known homologs	-1.38785	0.3235	-1.06688	0.0450433
BB0775		putative transcriptional regulator	transcription factor activity	Global Regulatory Functions	NA	NA	-1.3266	0.0075
BB0776		hypothetical protein		Unknown proteins, no known homologs	-1.57208	NA	-1.0664	0.0417346
BB0777		hypothetical protein		Unknown proteins, no known homologs	NA	NA	NA	NA
BB0778		putative membrane protein		Cell envelope	NA	NA	-1.43377	NA
BB0779		putative membrane protein		Cell envelope	NA	NA	1.10558	0.255
BB0780		putative type II secretion system protein		protein secretion	NA	NA	NA	NA
BB0781		putative type II secretion system protein	ATP binding	transport	NA	NA	-1.24736	0.0308995
BB0782		putative type II secretion system protein	nucleotide binding	peptidoglycan metabolism	-2.88439	NA	NA	NA
BB0783		putative membrane protein		Cell envelope	-3.19206	NA	NA	NA
BB0784		putative type II secretion system protein		protein secretion	-2.38045	0.003	NA	NA
BB0785		putative membrane protein		Cell envelope	NA	NA	NA	NA
BB0786		putative exported protein		Periplasmic/ Exported/ Lipoprotein	NA	NA	1.33909	0.03
BB0787		putative exported protein		Periplasmic/ Exported/ Lipoprotein	-1.76033	NA	-1.03033	0.0550757
BB0788		hypothetical protein		Unknown proteins, no known homologs	NA	NA	NA	NA
BB0789		putative exported protein		Periplasmic/ Exported/ Lipoprotein	NA	NA	NA	NA
BB0790		putative type II secretion system protein			NA	NA	NA	NA
BB0791	pilT	twitching mobility protein	ATP binding	transport	1.12541	NA	NA	NA
BB0792	gspO	type 4 prepilin-like proteins leader peptideprocessing enzyme	cysteine-type peptidase activity	proteolysis and peptidolysis	-1.75113	NA	1.06497	0.0536019
BB0793	vrgS	conserved hypothetical protein		Conserved in organism other than E. coli	NA	NA	NA	NA
BB0794		putative exported protein		Periplasmic/ Exported/ Lipoprotein	-2.37034	NA	NA	NA
BB0795		putative exported protein		Periplasmic/ Exported/ Lipoprotein	-1.94921	0.103602	NA	NA
BB0796		conserved hypothetical protein		Conserved in organism other than E. coli	-1.82057	0.106681	-1.08093	0.0515887
BB0797		hypothetical protein		Unknown proteins, no known homologs	-1.6176	0.285049	1.46777	0.21574
BB0798		conserved hypothetical protein		Conserved in organism other than E. coli	-1.62387	0.0402579	-1.06257	0.0222598
BB0799		conserved hypothetical protein		Conserved in organism other than E. coli	-1.68228	0.0419328	1.07919	0.0105119
BB0800		conserved hypothetical protein		Conserved in organism other than E. coli	-1.93872	0.0207764	1.10051	0.0233274		-3.82133	0	11.0623
BB0801		conserved hypothetical protein		Conserved in organism other than E. coli	-1.66694	0.040273	1.09467	0.0498755
BB0802		conserved hypothetical protein		Conserved in organism other than E. coli	-1.96004	0.0610238	-1.12155	0.0468586
BB0803		conserved hypothetical protein		Conserved in organism other than E. coli	-2.07149	0.0640323	1.06066	0.041961
BB0804		conserved hypothetical protein		Conserved in organism other than E. coli	-1.65188	0.0605	-1.02711	0.025
BB0805		conserved hypothetical protein		Conserved in organism other than E. coli	NA	NA	NA	NA
BB0806		conserved hypothetical protein		Conserved in organism other than E. coli	-1.89968	0.104244	-1.05999	0.0382609
BB0807		conserved hypothetical protein		Conserved in organism other than E. coli	-1.46138	0.0471158	-1.16879	0.0386962
BB0808		conserved hypothetical protein		Conserved in organism other than E. coli	-1.51522	0.133965	-1.35862	0.0365764
BB0809		putative exported protein		Periplasmic/ Exported/ Lipoprotein	-1.15854	0.2365	NA	NA
BB0810		putative ATPase with chaperone activity	chaperone activity		NA	NA	NA	NA
BB0811		conserved hypothetical protein		Conserved in organism other than E. coli	NA	NA	NA	NA
BB0812		putative lipoprotein		Periplasmic/ Exported/ Lipoprotein	NA	NA	NA	NA
BB0813		putative lipoprotein		Periplasmic/ Exported/ Lipoprotein	-1.93514	0.004	-1.20085	0.0352831
BB0814		conserved hypothetical protein		Conserved in organism other than E. coli	NA	NA	NA	NA
BB0815		putative outer membrane protein			-1.85226	0.0460079	-1.48942	0.0930454
BB0816		putative membrane protein		Cell envelope	-1.55278	0.0514998	1.09797	0.0105
BB0817		conserved hypothetical protein		Conserved in organism other than E. coli	-1.02237	0.227342	-1.30248	0.0137318
BB0818		hypothetical protein		Unknown proteins, no known homologs	-2.01301	0.0732488	-1.19611	0.0373731
BB0819		putative calcium			-2.42172	0.111783	-1.11932	0.0273038
BB0820		putative lipoprotein		Periplasmic/ Exported/ Lipoprotein	-2.28005	0.107059	-1.11111	0.0355
BB0821		autotransporter		transport	-2.21671	NA	-1.16706	NA
BB0822		putative phospholipase D protein	catalytic activity	metabolism	-1.63856	0.0425703	1.05381	0.0370405
BB0823	modD	molybdenum transport ATP-binding protein	ATP-binding cassette (ABC) transporter activity	transport	-1.72086	0.0391556	1.03046	0.0175404
BB0824	modC	molybdenum transport system permease protein	transporter activity	transport	-1.85928	0.0452259	-1.0264	0.0248752
BB0825	modB	molybdate-binding periplasmic protein precursor	sulfate porter activity	transport	-1.57775	0.0579824	-1.18961	0.0125632
BB0826		putative hydrolase	hydrolase activity		-2.50686	0.124099	-1.21492	0.0442029
BB0827		conserved hypothetical protein		Conserved in organism other than E. coli	-1.61138	0.168662	-1.41523	0.115726
BB0828		hypothetical protein		Unknown proteins, no known homologs	-2.40723	0.167002	-1.35768	0.0650775
BB0829		putative exported protein		Periplasmic/ Exported/ Lipoprotein	-2.29829	0.111474	-1.13545	0.0515113
BB0830		putative membrane protein		Cell envelope	-2.42699	0.0499732	1.14518	0.0238048	negative	-3.95873	0	10.5852
BB0831		putative exported protein		Periplasmic/ Exported/ Lipoprotein	-1.6711	0.029218	-1.16568	0.0457056
BB0832		probable TonB-dependent receptor	receptor activity	transport	-1.59603	0.0563102	-1.08212	0.0913057
BB0833		putative regulatory protein	transcription factor activity	Global Regulatory Functions	-2.19637	0.003	1.20643	0.114249
BB0834		ornithine aminotransferase	ornithine-oxo-acid transaminase activity	arginine metabolism	NA	NA	-1.0856	0.0350919
BB0835		arginase	arginase activity	metabolism	-1.51248	0.085	1.00102	0.024
BB0836		two-component response regulator	two-component response regulator activity	Global Regulatory Functions	-3.27845	0.152868	1.30288	0.24943
BB0837		putative lipoprotein		Periplasmic/ Exported/ Lipoprotein	-1.44137	0.0261032	-1.1552	0.0134205
BB0838		putative lipoprotein		Periplasmic/ Exported/ Lipoprotein	-1.23238	0.116416	-1.27261	0.078794
BB0839		conserved hypothetical protein		Conserved in organism other than E. coli	1.22874	0.313456	-1.3844	0.0995862
BB0840	metG	methionyl-tRNA synthetase	tRNA binding	translation	-2.25499	0.145932	-1.02631	0.0928371
BB0841		putative exported protein		Periplasmic/ Exported/ Lipoprotein	-1.63922	0.0461972	-1.00587	0.128683
BB0842		putative iron sulfur binding protein	ATP binding	transport	-1.07315	0.460129	-1.25238	0.074286
BB0843		putative exported protein		Periplasmic/ Exported/ Lipoprotein	-1.70424	0.061329	1.0533	0.1435
BB0844		putative exported protein		Periplasmic/ Exported/ Lipoprotein	-2.76085	0.176024	1.28299	0.209077
BB0845	dcd, dus, paxA	deoxycytidine triphosphate deaminase	dCTP deaminase activity	pyrimidine ribonucleotide biosynthesis	-1.9318	0.104437	1.1599	0.15823
BB0846		conseved hypothetical protein		Conserved in organism other than E. coli	-1.20304	0.008	-1.03412	0.149032
BB0847		putative lyase	lyase activity		-1.51317	0.0388628	1.01726	0.0472899
BB0848		putative acetyltransferase	N-acetyltransferase activity		-1.61086	0.0154589	-1.00382	0.0305951
BB0849		hypothetical protein		Unknown proteins, no known homologs	-1.54883	0.016561	-1.01782	0.0132563
BB0850		probable orn	amino acid metabolism	metabolism	-1.91926	0.0862038	1.12868	0.0683561
BB0851		putative exported protein		Periplasmic/ Exported/ Lipoprotein	-1.71528	0.0496515	1.08731	0.0381335
BB0852	sodA	superoxide dismutase [Mn]	superoxide dismutase activity	superoxide metabolism	-1.7591	0.0346426	1.00152	0.0005
BB0853		probable metal transporter	metal ion transporter activity	transport	-1.75113	0.001	-1.19539	0.13934
BB0854	gcvT	glycine cleavage system T protein	aminomethyltransferase activity	glycine catabolism	-1.30737	0.126871	-1.4188	0.0734488
BB0855	gcvH	glycine cleavage system H protein		glycine catabolism	-1.59451	0.0713405	-1.15373	0.0346154
BB0856	gcvP	glycine cleavage system P protein	glycine dehydrogenase (decarboxylating) activity	glycine decarboxylation via glycine cleavage system	-1.18086	0.084169	-1.40514	0.0654179
BB0857		putative GntR-family transcriptional regulator	transcription factor activity	Global Regulatory Functions	1.14381	0.147291	-1.34333	0.0388402
BB0858		conserved hypothetical protein		metabolism	-1.33586	0.3325	1.10085	0.0183424
BB0859		putative exported protein		Periplasmic/ Exported/ Lipoprotein	-1.35695	0.031	1.01624	0.028
BB0860		probable enoyl-CoA hydratase	catalytic activity	metabolism	-1.4214	0.004	-1.00459	0.0065
BB0861		putative exported protein		Periplasmic/ Exported/ Lipoprotein	-2.13346	0.206301	-1.0139	0.0095
BB0862		conserved hypothetical protein		Conserved in organism other than E. coli	-2.95822	0.151204	1.17411	0.104962
BB0863		conserved hypothetical protein		Conserved in organism other than E. coli	-1.50232	0.0235	-1.10612	0.0075
BB0864		putative ABC transpoter ATP-binding protein	ATP-binding cassette (ABC) transporter activity	transport	-1.94864	0.0980643	-1.38586	0.067906
BB0865		putative peptide ABC transporter permeaseprotein	transporter activity	transport	-3.15837	0.135179	-1.19153	0.0519882
BB0866		putative ABC transporter permease protein	transporter activity	transport	-1.61916	0.01	-1.01546	0.13
BB0867		putative extracellular solute-binding protein	transporter activity	transport	-1.86688	0.138569	-1.03903	0.002
BB0868	mmsA	putative methylmalonate-semialdehydedehydrogenase [acylating]	methylmalonate-semialdehyde dehydrogenase (acylating) activity	metabolism	-1.79971	0.177508	1.52995	0.409941
BB0869		omega-amino acid--pyruvate aminotransferase	beta-alanine-pyruvate transaminase activity		-1.70135	0.120886	1.32107	0.186009
BB0870		probable GntR-family transcriptional regulator	transcription factor activity	Global Regulatory Functions	-1.65161	0.0352152	-1.00664	0.0133448
BB0871	folA, tmrA	dihydrofolate reductase	dihydrofolate reductase activity	glycine biosynthesis	-1.83586	0.0713075	1.05863	0.0652972
BB0872		putative thymidylate synthase	thymidylate synthase activity	dTMP biosynthesis	-1.87523	0.0343362	1.11345	0.0589723
BB0873		conserved hypothetical protein	response to stress	Folding and Ushering	-1.86653	0.0819436	1.10508	0.0335224
BB0874		conserved hypothetical protein		Conserved in organism other than E. coli	-1.63072	0.0650644	1.04391	0.0584984
BB0875		probable glycosyltransferase	transferase activity	lipid metabolism	-1.7002	0.0411434	1.16066	0.0507533
BB0876	wbpO	polysaccharide biosynthesis protein		Cell envelope	-1.64338	0.0282588	1.05584	0.0305123
BB0877		UDP-N-acetylglucosamine C4 epimerase	catalytic activity	nucleotide-sugar metabolism	-1.25829	0.23207	1.10051	0.0435775
BB0878		putative membrane protein	pathogenesis	Cell envelope	-1.50366	0.095759	1.17437	0.0345166
BB0879		putative glycosyltranferase		biosynthesis	-1.72204	0.163186	1.12487	0.0680612
BB0880		putative asparagine synthase	asparagine synthase (glutamine-hydrolyzing) activity	asparagine biosynthesis	-1.54645	0.0571662	1.20482	0.0393136
BB0881		putative glycosyltransferase	transferase activity	biosynthesis	1.0001	0.37918	1.24594	0.0601004
BB0882		putative glycosyltransferase	transferase activity	biosynthesis	-3.42007	0.0616144	1.55863	0.166257	negative	-4.17001	0	9.86442
BB0883		putative glycosyltransferase	transferase activity	biosynthesis	NA	NA	1.53333	0.159692
BB0884	pgi	glucose-6-phosphate isomerase	glucose-6-phosphate isomerase activity	metabolism	-1.77025	0.0619536	1.1698	0.11436
BB0885	pgm	phosphoglucomutase	phosphomannomutase activity	carbohydrate metabolism	-1.6939	0.0354191	-1.04399	0.0281499
BB0886		hypothetical protein		Unknown proteins, no known homologs	-1.26478	0.0989394	-1.02577	0.0419888
BB0887		putative oxidoreductase		electron transport	-1.34952	0.0880877	-1.06544	0.0145
BB0888		putative two-component system responseregulator	two-component response regulator activity	Global Regulatory Functions	-1.55674	0.0505	-1.05067	0.0145
BB0889		putative two-component system sensor protein	two-component sensor molecule activity	signal transduction	-1.58546	0.00889757	-1.03684	0.068
BB0890		putative sulfatase	sulfuric ester hydrolase activity	metabolism	-2.24944	0.109106	1.0033	0.04238
BB0891	fahA, fah	fumarylacetoacetase	aromatic amino acid family metabolism	metabolism	-1.58922	0.0969215	-1.22284	0.128358
BB0892	hmgA	homogentisate 1,2-dioxygenase	homogentisate 1,2-dioxygenase activity	phenylalanine catabolism	-1.43438	0.0884122	-1.12991	0.108613
BB0893		putative LysR-family transcriptional regulator	transcription factor activity	Global Regulatory Functions	-1.82156	NA	NA	NA
BB0894		conserved hypothetical protein		Conserved in organism other than E. coli	-1.91999	0.0683142	1.06701	0.0163146
BB0895		putative oxygenase	monooxygenase activity	electron transport	-1.82652	0.0775219	1.10914	0.0399176
BB0896		putative cyclase			-1.94789	0.0576013	1.06421	0.0524792
BB0897	mutM, fpg	formamidopyrimidine-DNA glycosylase	zinc ion binding	carbohydrate metabolism	-1.65842	0.0431932	1.04924	0.0890679
BB0898		conserved hypothetical protein		Conserved in organism other than E. coli	-1.62308	0.0324846	1.10838	0.0599255
BB0899		putative outer membrane lipoprotein	chaperone activity	intracellular protein transport	-1.61267	0.0581265	1.08909	0.0699838
BB0900	ispE, ipk	4-diphosphocytidyl-2-C-methyl-D-erythritolkinase	ATP binding	terpenoid biosynthesis	-1.63896	0.0550931	1.14518	0.0361709
BB0901	prsA, prs	ribose-phosphate pyrophosphokinase	magnesium ion binding	nucleoside metabolism	-1.53418	0.0756376	1.1231	0.00787798
BB0902	rplY	50S ribosomal protein L25	structural constituent of ribosome	translation	-1.20246	0.0448952	1.10178	0.00426956
BB0903	pth	peptidyl-tRNA hydrolase	aminoacyl-tRNA hydrolase activity	translation	-1.7247	0.123947	1.00076	0.0750037
BB0904		putative membrane protein		Cell envelope	-2.3537	0.0978594	1.49797	0.0115
BB0905		conserved hypothetical protein	GTP binding	Conserved in organism other than E. coli	-1.67221	0.0823684	1.1033	0.173939
BB0906		putative integrase	DNA binding	DNA recombination	NA	NA	1.25178	NA
BB0907		conserved hypothetical protein		regulation of cell cycle	-2.08178	NA	1.39289	0.155593
BB0908		putative helicase	DNA binding		-3.43643	0.164258	1.42107	0.0886758
BB0909		conserved hypothetical protein		Conserved in organism other than E. coli	-2.91534	0.110604	1.21269	0.131056	negative	-3.20613	0	13.249
BB0910		putative ATPase	ATP binding		-2.24402	0.10718	1.16574	0.143998
BB0911		putative serine protease	subtilase activity	Folding and Ushering	-2.09131	0.0658228	1.04704	0.0699055
BB0912		type III restriction-modification systemmethyltransferase	DNA binding	DNA methylation	-2.22751	0.0994665	-1.12604	0.0223434
BB0913		type III restriction enzyme	type III site-specific deoxyribonuclease activity	DNA restriction	-2.11506	0.0681081	1.00558	0.0141569
BB0914		putative integrase		Laterally acquired elements	-1.84563	0.121595	-1.31553	0.13204
BB0915		conserved hypothetical protein		Conserved in organism other than E. coli	-1.58847	0.019	1.04619	0.0645
BB0916		autotransporter		transport	NA	NA	NA	NA
BB0917		putative regulatory protein	two-component response regulator activity	Global Regulatory Functions	1.17673	NA	NA	NA
BB0918		putative exported protein		Periplasmic/ Exported/ Lipoprotein	-2.03625	0.0342199	1.1	0.0715291
BB0919		putative TetR-family transcriptional regulator	transcription factor activity	Global Regulatory Functions	-1.83318	0.0748191	1.13934	0.0320062
BB0920		putative membrane protein		Cell envelope	-1.77212	0.0585928	1.14086	0.0396808
BB0921		putative membrane protein	transporter activity	transport	-1.75022	0.0302971	1.11218	0.068732
BB0922		GntR family transcriptional regulator	transcription factor activity	Global Regulatory Functions	-1.58446	0.0450094	1.0901	0.0667874
BB0923		putative acetolactate synthase large subunit	acetolactate synthase activity		-1.61526	0.069987	1.04112	0.0654249
BB0924		putative lipoprotein		Periplasmic/ Exported/ Lipoprotein	-1.46724	0.0645685	1.03985	0.0649286
BB0925		putative taurine dioxygenase	oxidoreductase activity, acting on single donors with incorporation of molecular oxygen, incorporation of two atoms of oxygen	electron transport	-1.33942	0.0221712	-1.13056	0.135581
BB0926	maeB	NADP-dependent malic enzyme	malate dehydrogenase (oxaloacetate-decarboxylating) (NADP+) activity	metabolism	-1.26192	0.043618	-1.12862	0.121487
BB0927		LysR family regulatory protein	transcription factor activity	Global Regulatory Functions	-1.32529	0.0378327	-1.14502	0.0756091
BB0928		binding-protein-dependent transport systemsinner membrane component	transporter activity	transport	-1.24551	0.0543365	-1.13741	0.0407901
BB0929		binding-protein-dependent transport systemsinner membrane component	transporter activity	transport	1.01144	0.221487	-1.04288	0.126445
BB0930		ABC transporter ATP-binding protein	ATP-binding cassette (ABC) transporter activity	transport	-2.25474	0.178341	1.04594	0.0353869
BB0931		bacterial extracellular solute-binding protein	transporter activity	transport	-1.17355	0.031	-1.36474	0.083912
BB0932		conserved hypothetical protein		Conserved in organism other than E. coli	-1.25062	0.0839901	-1.20195	0.0315
BB0933		LysR family regulatory protein	transcription factor activity	Global Regulatory Functions	-2.6267	0.142533	1.00305	0.0697005
BB0934		putative exported protein		Periplasmic/ Exported/ Lipoprotein	-1.99837	0.112993	-1.14358	0.02979
BB0935		conserved hypothetical protein		Conserved in organism other than E. coli	-1.53982	0.106233	-1.29904	0.0268557
BB0936		putative ArsR family transcriptional regulator	transcription factor activity	Global Regulatory Functions	-1.57973	0.0377548	-1.21755	0.00550757
BB0937		putative exported protein		Periplasmic/ Exported/ Lipoprotein	-1.943	0.0456879	1.00635	0.0307581
BB0938		hypothetical protein		Unknown proteins, no known homologs	-1.3332	0.159797	-1.15441	0.00928597
BB0939		putative transport protein			-2.07046	0.107591	-1.10488	0.0215
BB0940	fdx	ferredoxin	electron transporter activity	metabolism	-1.65405	0.0212672	1.01523	0.0277909
BB0941	coaD, kdtB	phosphopantetheine adenylyltransferase	pantetheine-phosphate adenylyltransferase activity	coenzyme A biosynthesis	-2.33024	0.0503312	1.35431	0.172334	negative	-3.82778	0	11.0398
BB0942		conserved hypothetical protein	S-adenosylmethionine-dependent methyltransferase activity		-1.63217	0.143259	1.05076	0.0950815
BB0943	ftsY	cell division protein	RNA binding	cytokinesis	-1.6959	0.0970276	1.12614	0.0191458
BB0944		conserved hypothetical protein	adenylate cyclase activity	cAMP biosynthesis	-1.93626	0.0570449	1.18579	0.0370518
BB0945		binding-protein-dependent transport systempermease protein	transporter activity	transport	-1.66446	0.0324812	1.16726	0.04875
BB0946		binding-protein-dependent transport systemsinner membrane component	transporter activity	transport	-1.60597	0.0439012	1.20482	0.0123718
BB0947		putative transport system ATP-binding protein	ATP-binding cassette (ABC) transporter activity	transport	-1.54218	0.0270809	1.11599	0.0384174
BB0948		putative exported protein		Periplasmic/ Exported/ Lipoprotein	-1.40728	0.0178632	1.03096	0.0142624
BB0949		putative transcriptional regulator	DNA binding	regulation of transcription, DNA-dependent	-1.29358	0.0612093	-1.01233	0.0360208
BB0950		haloacid dehalogenase-like hydrolase	hydrolase activity	metabolism	-1.25593	0.0335099	-1.06057	0.0659184
BB0951	ribB	putative 3,4-dihydroxy-2-butanone 4-phosphatesynthase	vitamin B2 biosynthesis	metabolism	-1.25562	0.0326115	1.00406	0.0266802
BB0952	ribH	putative 6,7-dimethyl-8-ribityllumazinesynthase	vitamin B2 biosynthesis	metabolism	-1.2822	0.116877	-1.11142	0.0601559
BB0953	nusB, ssyB	N utilization substance protein B	RNA binding	transcription termination	-1.17644	0.0878505	1.00745	0.0177044
BB0954	thiL	putative thiamine-monophosphate kinase	thiamin-phosphate kinase activity	thiamin biosynthesis	-1.31061	0.0550295	1.06269	0.0412177
BB0955		putative phosphatidylglycerophosphatase	phosphatidylglycerophosphatase activity	lipid metabolism	-1.1064	0.0500544	-1.01835	0.0295251
BB0956		conserved hypothetical protein		Conserved in organism other than E. coli	-1.29675	0.0510873	-1.04759	0.0157711
BB0957	pyrF	putative orotidine 5'-phosphate decarboxylase	orotidine-5'-phosphate decarboxylase activity	'de novo' pyrimidine base biosynthesis	-1.43071	0.0776868	-1.04955	0.055524
BB0958	ndh	putative NADH dehydrogenase	NADH dehydrogenase activity	metabolism	-1.59451	0.0656298	-1.02872	0.0287127
BB0959	dgkA	putative diacylglycerol kinase	diacylglycerol kinase activity	phospholipid biosynthesis	-1.41397	0.0548666	1.05254	0.0690005
BB0960	brkB	serum resistance protein	ribonuclease activity		-1.2486	0.0841746	-1.19249	0.0344408
BB0961	brkA	serum resistance protein (pseudogene)		Cell envelope	-1.26462	0.118871	-1.06371	0.0272305
BB0962	cpn60, groEL, mopA, groL	60 kDa chaperonin	chaperone activity	protein refolding	1.37633	0.114451	-2.36779	0.00972111
BB0963	cpn10, groES	10 kDa chaperonin	chaperone activity		2.59224	1.51404	-1.45764	0.0618686
BB0964		hypothetical protein		Unknown proteins, no known homologs	-1.42261	0.051	-1.00562	0.0035
BB0965		conserved hypothetical protein	racemase and epimerase activity, acting on amino acids and derivatives	metabolism	NA	NA	1.82487	0.0275
BB0966		hypothetical protein		Unknown proteins, no known homologs	-1.55098	0.0325	1.03299	0.0295
BB0967		putative dehydrogenase		metabolism	-1.98089	0.142731	1.11954	0.0861272
BB0968		putative exported protein		Periplasmic/ Exported/ Lipoprotein	-1.97273	0.0798295	1	0.0368624
BB0969		LysR-family transcriptional regulator	transcription factor activity	Global Regulatory Functions	-1.95053	0.0485369	-1.0306	0.0263514
BB0970		conserved hypothetical protein		Conserved in organism other than E. coli	-1.66833	0.0185	1.03198	0.0125
BB0971		putative exported protein		Periplasmic/ Exported/ Lipoprotein	-1.78724	0.0209947	1.00305	0.0255799
BB0972		probable transcriptional regulator	DNA binding	Global Regulatory Functions	-1.58772	0.0362701	1.07893	0.0485118
BB0973		probable carboxymuconolactone decarboxylase	4-carboxymuconolactone decarboxylase activity	aromatic compound metabolism	-1.24798	0.0966131	1.04264	0.0307436
BB0974		probable 6-phosphogluconate dehydrogenase	phosphogluconate dehydrogenase (decarboxylating) activity	pentose-phosphate shunt	-1.19549	0.0908743	1.08223	0.0239583
BB0975		probable hydrolase	hydrolase activity	metabolism	-1.19745	0.161908	NA	NA
BB0976		lactate permease family protwin	lactate transporter activity	lactate transport	1.19204	0.370852	-1.20563	0.0271784
BB0977		putative membrane protein		Cell envelope	1.33536	0.694806	1.08655	0.141029
BB0978	ggt	gamma-glutamyltranspeptidase precursor	gamma-glutamyltransferase activity		1.16837	0.64336	1.26244	0.216489
BB0979		putative universal stress protein		Folding and Ushering	1.99344	1.07299	-1.07857	0.0249144
BB0980		putative GnaT-family acetyltransferase	N-acetyltransferase activity		-1.08738	0.141801	-1.15238	0.0285259
BB0981		probable acyl-CoA dehydrogenase	acyl-CoA dehydrogenase activity	electron transport	-1.21849	0.147742	-1.14835	0.0642669
BB0982		conserved hypothetical protein		metabolism	-1.73691	0.0835007	-1.06515	0.0538662
BB0983		putative exported protein		Periplasmic/ Exported/ Lipoprotein	-1.43848	0.059656	-1.09688	0.028
BB0984		probable LysR-family transcriptional regulator	transcription factor activity	Global Regulatory Functions	1.04933	0.306457	-1.18354	0.0372097
BB0985		hypothetical protein		Unknown proteins, no known homologs	-1.22101	0.0860034	-1.09293	0.057523
BB0986		putative exported protein		Periplasmic/ Exported/ Lipoprotein	1.09667	0.198579	-1.72353	0.0979945
BB0987		putative membrane protein		Cell envelope	-2.02355	0.0765582	-1.14535	0.0418748
BB0988		conserved hypothetical protein		Conserved in organism other than E. coli	-2.51438	0.0355	1.65381	NA
BB0989		putative exported protein		Periplasmic/ Exported/ Lipoprotein	-2.28471	0.0425	1.50863	NA
BB0990		probable LysR-family transcriptional regulator	transcription factor activity	Global Regulatory Functions	-1.50976	NA	-1.02231	0.0515
BB0991		putative membrane protein		Cell envelope	-1.94638	0.109863	-1.0893	0.0539125
BB0992		probable pyridine nucleotide-disulphideoxidoreductase	disulfide oxidoreductase activity	electron transport	-2.49938	0.2245	1.17234	0.105086
BB0993		conserved hypothetical protein		Conserved in organism other than E. coli	-1.79297	0.251926	-1.17964	0.103917
BB0994		probable FAD dependent oxidoreductase	oxidoreductase activity	electron transport	-1.40826	0.11	-1.06891	0.0695
BB0995		putative dipeptidase	membrane dipeptidase activity	proteolysis and peptidolysis	-1.75787	0.0473474	-1.19249	0.0293002
BB0996		probable ABC transporter ATP-binding protein	ATP-binding cassette (ABC) transporter activity	transport	-1.68256	0.045	-1.06659	0.0015
BB0997		putative inner membrane component ofbinding-protein-dependent transport system	transporter activity	transport	-1.04478	NA	1.33706	NA
BB0998		putative inner membrane component ofbinding-protein-dependent transport system	transporter activity	transport	-1.53817	0.6195	NA	NA
BB0999		putative extracellular solute-binding protein	transporter activity	transport	-2.3362	0.202032	-1.31684	NA
BB1000		probable LysR-family transcriptional regulator	transcription factor activity	Global Regulatory Functions	-1.0056	0.294246	-1.35582	0.0275
BB1001		putative enoyl-CoA hydratase	catalytic activity	metabolism	1.48428	0.769108	-1.086	0.066747
BB1002		putative long-chain-fatty-acid-CoA ligase	ligase activity	metabolism	NA	NA	-1.10056	0.024
BB1003		putative exported protein		Periplasmic/ Exported/ Lipoprotein	-1.04003	0.269968	-1.20933	0.0502336
BB1004		LysR-family transcriptioanl regulator	transcription factor activity	Global Regulatory Functions	-1.47868	0.0685476	-1.17157	0.0346948
BB1005		probable ATP-binding component of ABCtransporter	ATP-binding cassette (ABC) transporter activity	transport	-1.43448	0.351396	-1.25159	0.0685991
BB1006		inner membrane component of ABC transporter	transporter activity	transport	-1.94037	0.178416	-1.47621	0.0176794
BB1007		inner membrane component of ABC transporter	transporter activity	transport	-1.80456	0.0236201	-1.04983	0.0933081
BB1008		substrate binding component of ABC transporter	transporter activity	transport	1.0175	0.272302	-1.29776	0.011811
BB1009		hypothetical protein	hydrolase activity	nucleotide metabolism	-1.03243	0.252526	-1.28842	0.0296212
BB1010	phnA	phosphonoacetate hydrolase	hydrolase activity	nucleotide metabolism	-1.28633	0.101855	-1.6214	0.0309152
BB1011	phnR	LysR-family transcriptional regulator	transcription factor activity	Global Regulatory Functions	-1.53723	0.0220021	-1.22767	0.0486701
BB1012		putative ornithine cyclodeaminase	ornithine cyclodeaminase activity		-1.40061	0.0175	-1.23125	0.017
BB1013	aphA, aph	acetylpolyamine aminohydrolase	hydrolase activity		-1.22862	0.344	-1.748	0.0885
BB1014	leuB	3-isopropylmalate dehydrogenase	3-isopropylmalate dehydrogenase activity	leucine biosynthesis	NA	NA	1.17868	NA
BB1015	leuD	3-isopropylmalate dehydratase small subunit	3-isopropylmalate dehydratase activity	leucine biosynthesis	-1.58734	0.0276628	-1.06219	0.0806749
BB1016	leuC	3-isopropylmalate dehydratase large subunit	3-isopropylmalate dehydratase activity	metabolism	-2.74277	0.098	NA	NA
BB1017		putative exported protein		Periplasmic/ Exported/ Lipoprotein	-1.80343	0.148878	-1.21156	0.0232451
BB1018		probable transmembrane permease ABC transporterprotein	transporter activity	transport	-1.25766	0.141602	-1.03249	0.0797381
BB1019		ATP-binding ABC transporter protein	ATP-binding cassette (ABC) transporter activity	transport	-2.12265	0.1432	-1.08064	0.0165
BB1020		LysR-family transcriptional regulator	transcription factor activity	Global Regulatory Functions	-1.85791	0.113098	-1.10241	0.0595896
BB1021		putative membrane protein		Cell envelope	-2.00379	0.191388	-1.04426	0.0194781
BB1022		putative acetyltransferase	N-acetyltransferase activity		-1.70279	0.120035	-1.34318	0.0560069
BB1023		putative exported protein		Periplasmic/ Exported/ Lipoprotein	-2.47052	0.0542917	-1.26201	0.0415
BB1024		LysR-family transcriptional regulator	transcription factor activity	Global Regulatory Functions	-1.10653	0.0892847	-1.28381	0.0231242
BB1025		probable sulfatase	sulfuric ester hydrolase activity	metabolism	-1.28844	0.0255365	-1.67233	0.237003
BB1026		putative exported protein		Periplasmic/ Exported/ Lipoprotein	NA	NA	-1.09688	NA
BB1027		LysR-family transcriptional regulator	transcription factor activity	Global Regulatory Functions	-1.09068	0.0845	-1.30406	0.0927188
BB1028		putative exported protein		Periplasmic/ Exported/ Lipoprotein	NA	NA	NA	NA
BB1029		putative enoyl-CoA hydratase	isomerase activity	metabolism	NA	NA	NA	NA
BB1030		putative exported protein		Periplasmic/ Exported/ Lipoprotein	-1.6462	NA	-1.36521	0.0145
BB1031		3-hydroxyisobutyrate dehydrogenase	3-hydroxyisobutyrate dehydrogenase activity		-1.58396	0.167739	-1.19539	0.021
BB1032		hypothetical protein		Unknown proteins, no known homologs	-1.59755	0.009	-1.24134	0.0065
BB1033		putative 2,4-dihydroxyhept-2-ene-1,7-dioic acidaldolase	aldolase activity	metabolism	-1.02896	0.328379	-1.34885	0.0466322
BB1034		conserved hypothetical protein		Conserved in organism other than E. coli	-1.57948	0.043	-1.06775	0.0425
BB1035		putative ribulose bisphosphatecarboxylaseoxygenase,large subunit	ribulose-bisphosphate carboxylase activity	carbon utilization by fixation of carbon dioxide	-1.64566	0.142158	-1.20122	0.0198284
BB1036		LysR-family transcriptional regulator	transcription factor activity	Global Regulatory Functions	-1.70438	0.0703448	-1.0139	0.0015
BB1037		LysR-family transcriptional regulator	transcription factor activity	regulation of transcription, DNA-dependent	1.44048	NA	1.08426	NA
BB1038		probable enoyl-CoA hydratase	enoyl-CoA hydratase activity	metabolism	-1.34443	0.0815	1.03519	0.130946
BB1039		putative exported protein		Periplasmic/ Exported/ Lipoprotein	-1.48996	0.045615	1.11878	0.022
BB1040		conserved hypothetical protein		metabolism	-1.59073	0.0193412	1.07953	0.054566
BB1041		LysR-family transcriptional regulator	transcription factor activity	Global Regulatory Functions	-1.58922	0.067558	1.05127	0.0175
BB1042		extracellular solute-binding protein			-1.50569	0.013	-1.00254	0.0015
BB1043		ATP-binding component of ABC transporter	ATP-binding cassette (ABC) transporter activity	transport	-1.5706	NA	-1.00664	0.0345
BB1044		inner membrane component of ABC transporter	transporter activity	transport	NA	NA	-1.0896	NA
BB1045	aatB	aspartate aminotransferase	aspartate transaminase activity	biosynthesis	NA	NA	-1.14535	0.136313
BB1046	pepM	phosphoenolpyruvate phosphomutase	phosphoenolpyruvate mutase activity		NA	NA	-1.25638	NA
BB1047		putative exported protein		Periplasmic/ Exported/ Lipoprotein	NA	NA	-1.49299	0.0219255
BB1048		putative gluconolactonase	gluconolactonase activity		1.15823	NA	-1.28927	0.042
BB1049		putative aldolase	aldolase activity		-1.97157	0.195	1.05753	0.0451897
BB1050		putative dehydrogenase	oxidoreductase activity, acting on the CH-OH group of donors, NAD or NADP as acceptor	L-serine biosynthesis	NA	NA	NA	NA
BB1053		putative dioxygenase	taurine dioxygenase activity	electron transport	-1.37532	0.4675	-1.22284	0.0743735
BB1054		LysR-family transcriptional regulator	transcription factor activity	Global Regulatory Functions	NA	NA	NA	NA
BB1055	metY	O-acetylhomoserine sulfhydrylase	amino acid metabolism	metabolism	-1.96786	0.130105	1.35508	0.203386
BB1056		conserved hypothetical protein	catalytic activity	aromatic compound metabolism	-1.18378	0.183334	-1.35209	0.0465
BB1057		conserved hypothetical protein		Conserved in organism other than E. coli	-1.52974	0.0495	-1.24369	0.009
BB1058		GntR-family transcriptional regulator	transcription factor activity	Global Regulatory Functions	-1.16864	0.175621	-1.28422	0.001
BB1059		conserved hypothetical protein		metabolism	-1.46745	0.044	-1.18746	0.0235
BB1060		probable extracellular solute-binding protein		transport	-1.52418	0.0145	-1.17893	0.0335
BB1061		putative integral membrane transport protein			-1.47003	0.016	-1.18318	0.0195
BB1062		putative membrane protein		Cell envelope	-1.43234	0.043	-1.10241	0.0325
BB1063		conserved hypothetical protein		Conserved in organism other than E. coli	NA	NA	NA	NA
BB1064		putative hydrolase	hydrolase activity		-1.56987	0.0015	-1.13218	0.102871
BB1065		putative NAD dependent epimerase	oxidoreductase activity	nucleotide-sugar metabolism	-1.66253	0.123	-1.07533	0.023
BB1066		putative membrane protein		Cell envelope	-1.67416	0.052	-1.15678	0.0325
BB1067		putative exported protein		Periplasmic/ Exported/ Lipoprotein	-2.04121	0.161593	-1.06891	0.0295113
BB1068		probable aldehyde dehydrogenase	oxidoreductase activity	metabolism	-1.66089	0.046	-1.01651	0.007
BB1069		putative dehydrogenase	oxidoreductase activity, acting on CH-OH group of donors	metabolism	-1.73213	0.0125	-1.0139	0.0025
BB1070		conserved hypothetical protein		Conserved in organism other than E. coli	-1.66833	0.0125	1.04264	0.027
BB1071		putative permease component of ABC transporter	transporter activity	transport	NA	NA	NA	NA
BB1072		ATP-binding component of ABC transporter	ATP-binding cassette (ABC) transporter activity	transport	-1.39507	0.28426	-1.68089	0.012
BB1073		putative substrate binding component of ABCtransporter		transport	-1.94864	0.039	NA	NA
BB1074		GntR-family transcriptional regulator	transcription factor activity	Global Regulatory Functions	-1.65694	0.0446549	-1.05999	0.11224
BB1075		putative carboxymuconolactone decarboxylase	4-carboxymuconolactone decarboxylase activity	metabolism	-1.27569	0.0665891	-1.05432	0.141832
BB1076		conserved hypothetical protein	aminocarboxymuconate-semialdehyde decarboxylase activity	metabolism	NA	NA	-1.17122	0.0399625
BB1077		conserved hypothetical protein	aminocarboxymuconate-semialdehyde decarboxylase activity	metabolism	-1.14469	NA	NA	NA
BB1078		putative exported protein		Periplasmic/ Exported/ Lipoprotein	-1.53652	0.433346	-1.27673	0.0725
BB1079		putative hydrolase	hydrolase activity		NA	NA	-1.12786	0.151574
BB1080		putative isochorismatase	catalytic activity	metabolism	-1.94337	0.10703	-1.17367	0.0397772
BB1081		LysR-family transcriptional regulator	transcription factor activity	Global Regulatory Functions	-1.45979	0.059	-1.27977	0.0417027
BB1082		putative acetyltransferase	N-acetyltransferase activity		-1.77525	0.137871	-1.21231	0.0035
BB1083		conserved hypothetical protein		metabolism	-1.45345	0.0165227	-1.18746	0.0175
BB1084		TetR-family transcriptional regulator	transcription factor activity	Global Regulatory Functions	-1.88933	0.0603551	-1.127	0.013
BB1085		putative exported protein		Periplasmic/ Exported/ Lipoprotein	-1.64977	0.0855812	-1.16522	0.0261045
BB1086		putative thiolase	catalytic activity	fatty acid biosynthesis	-1.58346	0.128784	-1.15951	0.0125
BB1087		putative enoyl-CoA hydratase	isomerase activity	metabolism	NA	NA	NA	NA
BB1088		putative short chain dehydrogenase	oxidoreductase activity	metabolism	-1.60444	0.0475	1.02335	0.027
BB1089		putative enoyl-CoA hydratase	isomerase activity	metabolism	-1.57466	0.0182683	-1.07386	0.0490992
BB1090		conserved hypothetical protein		metabolism	-1.73661	0.001	-1.16019	0.100297
BB1091		LysR-FAMILY transcriptional regulator	transcription factor activity	Global Regulatory Functions	-1.92625	0.0901693	-1.15509	0.0306196
BB1092		putative exported protein		Periplasmic/ Exported/ Lipoprotein	-1.82486	0.0434999	-1.12636	0.0446794
BB1093		putative membrane protein		Cell envelope	-1.91487	0.06326	-1.02311	0.0213283
BB1094		conserved hypothetical protein	catalytic activity	Conserved in organism other than E. coli	-2.22308	0.052999	-1.00664	0.0884661	negative	-3.36202	0	12.6906
BB1095		putative exported protein		Periplasmic/ Exported/ Lipoprotein	-2.01463	0.13429	-1.09384	0.0896935
BB1096		LysR-family transcriptional regulator	transcription factor activity	Global Regulatory Functions	-1.29749	0.0858269	-1.60163	0.0638279
BB1097		conserved hypothetical protein		metabolism	-1.42201	0.245565	-1.32705	0.0260812
BB1098		probable acyl-CoA dehydrogenase	acyl-CoA dehydrogenase activity	electron transport	-1.45251	0.182725	-1.04454	NA
BB1099		putative exported protein		Periplasmic/ Exported/ Lipoprotein	NA	NA	NA	NA
BB1100	mgtA	Mg(2+) transport ATPase	ATP binding	metabolism	NA	NA	NA	NA
BB1101		two component sensor kinase	two-component sensor molecule activity	Global Regulatory Functions	-2.33159	0.0460731	1.32157	0.0530948
BB1102		two component response regulator	two-component response regulator activity	Global Regulatory Functions	-2.02151	NA	-1.04565	0.009
BB1103		putative exported protein		Periplasmic/ Exported/ Lipoprotein	-1.24829	0.100645	-1.25959	0.0312303
BB1104		[2Fe-2S] protein	oxidoreductase activity	electron transport	-1.40688	0.10217	-1.31028	0.058811
BB1105		conserved hypothetical protein		Conserved in organism other than E. coli	-1.91999	0.093334	-1.13741	0.0479635
BB1106		ferredoxin	electron transporter activity	metabolism	-1.90696	0.109282	-1.45138	0.0403705
BB1107		ferredoxin reductase	disulfide oxidoreductase activity	metabolism	-1.62544	0.0335152	-1.2999	0.0160799
BB1108	dapA	putative dihydrodipicolinate synthase	dihydrodipicolinate synthase activity		-1.77776	0.0895216	-1.22474	0.0445484
BB1109	lldD, lctD	FMN-dependent dehydrogenase	L-lactate dehydrogenase (cytochrome) activity	electron transport	-1.60418	0.0757728	-1.19539	0.0561026
BB1110		conserved hypothetical protein		Conserved in organism other than E. coli	-1.88755	0.0736756	-1.22133	0.0275
BB1111		IclR-family transcriptional regulator	DNA binding	regulation of transcription, DNA-dependent	-1.33108	0.193778	-1.04676	0.041
BB1112		LysR-family transcriptional regulator	transcription factor activity	Global Regulatory Functions	-1.47391	0.011	1.00558	0.0690706
BB1113		probable short chain dehydrogenase	oxidoreductase activity	metabolism	-1.7917	0.10849	-1.11205	0.0767218
BB1114		putative exported protein		Periplasmic/ Exported/ Lipoprotein	-1.49829	0.0115	-1.03684	0.007
BB1115		hypothetical protein		Unknown proteins, no known homologs	-2.00939	0.118882	-1.14535	0.035
BB1116		nitrilase	nitrilase activity	nitrogen metabolism	-1.99742	0.100245	-1.26174	0.0892717
BB1117		conserved hypothetical protein		Conserved in organism other than E. coli	-1.76962	0.0311341	-1.11111	0.0115
BB1118		putative exported protein		Periplasmic/ Exported/ Lipoprotein	-2.77456	NA	1.06904	NA
BB1119		LysR-family transcriptional regulator	transcription factor activity	regulation of transcription, DNA-dependent	-2.92467	0.214796	-1.1543	0.147537
BB1120		two-component system response regulator	two-component response regulator activity	Global Regulatory Functions	-1.40708	0.0375979	-1.26161	0.0422342
BB1121		putative exported protein		Periplasmic/ Exported/ Lipoprotein	-1.35512	0.0851014	-1.65895	0.0244178
BB1122		two-component system sensor kinase	signal transducer activity	Global Regulatory Functions	-4.59132	0.005	1.34036	0.334134
BB1123		putative enoyl-CoA hydratase	catalytic activity	metabolism	-1.32827	0.114643	-1.04205	0.067162
BB1124		putative enoyl-CoA hydratase	isomerase activity	metabolism	NA	NA	1.29746	0.377022
BB1125		putative long-chain-fatty-acid-CoA ligase	ligase activity	metabolism	1.02874	NA	1.62437	NA
BB1126		probable acyl-CoA dehydrogenase	acyl-CoA dehydrogenase activity	electron transport	-1.92514	0.0795	NA	NA
BB1127		conserved hypothetical protein		Conserved in organism other than E. coli	-1.69859	0.0724304	-1.08331	0.0538042
BB1128		conserved hypothetical protein		Conserved in organism other than E. coli	-2.89937	NA	NA	NA
BB1129		conserved hypothetical protein		Conserved in organism other than E. coli	-1.82123	0.111426	-1.13873	0.11537
BB1130		probable outer membrane protein			-1.80004	0.0702738	-1.16983	0.0316412
BB1131		putative membrane protein		Cell envelope	-1.17657	0.0569945	-1.45549	0.0230701
BB1132		conserved hypothetical protein		Conserved in organism other than E. coli	-2.14027	0.102434	-1.16499	0.0424588
BB1133		hypothetical protein		Unknown proteins, no known homologs	-1.52348	0.05	-1.66105	0.001
BB1134		conserved hypothetical protein		Conserved in organism other than E. coli	NA	NA	-1.52241	NA
BB1135		hypothetical protein		Unknown proteins, no known homologs	-2.13845	0.0418821	1.20863	0.108545	negative	-3.20222	0	13.263
BB1136		putative calcium			NA	NA	-1.07965	0.0842503
BB1137		conserved hypothetical protein		Conserved in organism other than E. coli	-1.29109	0.099	-1.18295	0.108699
BB1138		putative GntR-family transcriptional regulator	transcription factor activity	Global Regulatory Functions	-1.39208	0.0416088	1.04772	0.02
BB1139		putative membrane protein		Cell envelope	-1.50232	0.0248479	-1.13676	0.108736
BB1140		putative membrane protein		Cell envelope	-1.56158	0.038226	-1.00922	0.0111654
BB1141		putative GntR-family transcriptional regulator	transcription factor activity	regulation of transcription, DNA-dependent	-1.33479	0.082604	-1.13218	0.0674203
BB1142		putative amidase	amidase activity		NA	NA	-1.84803	NA
BB1143		conserved hypothetical protein		metabolism	-1.52372	0.109191	-1.28548	0.0152609
BB1144		putative enoyl-CoA hydratase	catalytic activity	metabolism	-1.69877	0.0445	-1.71205	0.0221911
BB1145		putative exported protein		Periplasmic/ Exported/ Lipoprotein	-1.5133	0.145236	-1.27646	0.0433948
BB1146		putative inner membrane component ofbinding-protein-dependent transport system	transporter activity	transport	-1.78423	0.039485	-1.24369	0.003
BB1147		probable ATP-binding component of ABCtransporter	ATP-binding cassette (ABC) transporter activity	transport	-1.28613	NA	1.01252	0.150238
BB1148		conserved hypothetical protein	hydrolase activity, acting on carbon-nitrogen (but not peptide) bonds	carbohydrate metabolism	NA	NA	-1.30897	0.0535
BB1149		probable short chain dehydrogenase	oxidoreductase activity	metabolism	NA	NA	NA	NA
BB1150		putative transcriptional regulator	DNA binding	regulation of transcription, DNA-dependent	-1.24736	0.0325	-1.00254	0.0525
BB1151		putative branched-chain amino acid-bindingprotein			-1.2715	0.084	-1.3844	0.0315
BB1152		conserved hypothetical protein	oxidoreductase activity	metabolism	NA	NA	NA	NA
BB1153		acetyl-CoA synthetase	catalytic activity	metabolism	NA	NA	NA	NA
BB1154		conserved hypothetical protein		Conserved in organism other than E. coli	NA	NA	NA	NA
BB1155		probable permease component of branched-chainamino acid transporter	transporter activity	transport	NA	NA	NA	NA
BB1156		probable permease component of branched-chainamino acid transporter	transporter activity	transport	NA	NA	NA	NA
BB1157	livG, livF	high-affinity branched-chain amino acidtransport ATP-binding protein	ATP-binding cassette (ABC) transporter activity	transport	NA	NA	-1.18035	0.1145
BB1158	livF, livG	high-affinity branched-chain amino acidtransport ATP-binding protein	ATP-binding cassette (ABC) transporter activity	transport	NA	NA	-1.24055	0.015
BB1159		putative NADH:flavin oxidoreductase	oxidoreductase activity	metabolism	NA	NA	NA	NA
BB1160		putative lysR-family transcriptional regulator	transcription factor activity	Global Regulatory Functions	NA	NA	-2.03934	0.024
BB1161		conserved hypothetical protein		Conserved in organism other than E. coli	NA	NA	1.15736	NA
BB1162		conserved hypothetical protein	zinc ion binding	Conserved in organism other than E. coli	NA	NA	-1.17402	0.15
BB1163		putative membrane transport protein	transporter activity	transport	NA	NA	NA	NA
BB1164		putative LysR-family transcriptional regulator	transcription factor activity	Global Regulatory Functions	-1.17438	0.0725608	-1.46305	0.0292186
BB1165		putative exported protein		Periplasmic/ Exported/ Lipoprotein	-1.3001	0.52	-1.28088	NA
BB1166		amidase	amidase activity		-2.26158	0.0692965	-1.28842	0.0694712
BB1167	ribE, ribC	riboflavin synthase alpha chain	riboflavin synthase activity	metabolism	-1.89753	0.0414153	-1.05999	0.134342
BB1168		putative exported protein		Periplasmic/ Exported/ Lipoprotein	-1.60265	0.158767	-1.01625	0.104841
BB1169		putative AsnC-family transcriptional regulator	transcription factor activity	Global Regulatory Functions	1.03153	0.393478	-1.2153	0.1205
BB1170		hypothetical protein		Unknown proteins, no known homologs	-1.26478	0.126355	-1.51538	0.0288589
BB1171		putative acid CoA ligase	ligase activity	metabolism	-1.23223	0.0798008	-1.15678	0.1215
BB1172		conserved hypothetical protein		Conserved in organism other than E. coli	NA	NA	1.04315	0.107565
BB1173		putative ABC transport proteins, inner membranecomponent	transporter activity	transport	NA	NA	1.25812	0.310299
BB1174		putative ABC transport proteins, ATP-bindingcomponent	ATP-binding cassette (ABC) transporter activity	transport	-1.57577	0.257899	1.2736	0.346948
BB1175		putative exported protein		Periplasmic/ Exported/ Lipoprotein	-1.73392	0.151302	1.02234	0.214275
BB1176		conserved hypothetical protein	catalytic activity	Conserved in organism other than E. coli	-1.39131	0.328073	-1.37059	0.315819
BB1177		putative alcohol dehydrogenase	NADPH:quinone reductase activity	metabolism	-1.51194	0.296785	-1.27056	0.205019
BB1178		conserved hypothetical protein		Conserved in organism other than E. coli	-1.62734	0.220061	-1.12507	0.0719357
BB1179		conserved hypothetical protein		Conserved in organism other than E. coli	-2.13482	0.0650974	1.00305	0.110346
BB1180		probable cation-transporting ATPase	copper-exporting ATPase activity	metabolism	-1.9178	0.0771896	-1.01285	0.0269892
BB1181		conserved hypothetical protein	catalytic activity	Conserved in organism other than E. coli	-1.73872	0.0692259	1.09949	0.0215639
BB1182	tyrB	aromatic-amino-acid aminotransferase	aromatic-amino-acid transaminase activity	biosynthesis	-1.65705	0.0732665	1.0967	0.0232285
BB1183		putative isochorismatase	catalytic activity	metabolism	-1.75756	0.0340419	1.35558	0.169645
BB1184		putative exported protein		Periplasmic/ Exported/ Lipoprotein	NA	NA	1.30508	0.0115
BB1185		putative exported protein		Periplasmic/ Exported/ Lipoprotein	-2.95214	0.0791251	1.42487	0.109615	negative	-3.64923	0	11.6676
BB1186		putative hemolysin, homophilic cell adhesion	calcium ion binding	Periplasmic/ Exported/ Lipoprotein	-2.83479	0.0636849	1.96168	0.247584	negative	-4.66658	0	8.24463
BB1187		putative LuxR-family transcriptional regulator	transcription factor activity	Global Regulatory Functions	-2.60357	0.0347867	1.31523	0.0731727	negative	-6.22164	0	4.03401
BB1188		HlyD-family secretion protein	protein transporter activity	transport	-4.95564	0.0482648	2.15457	0.128424	negative	-7.36369	0	1.87676
BB1189		probable ABC transporter	ATP-binding cassette (ABC) transporter activity	transport	-3.80871	0.0612182	2.59467	0.395602	negative	-5.19069	0	6.66937
BB1190		hypothetical protein		Unknown proteins, no known homologs	-3.51573	0.0231137	1.91827	0.211619	negative	-10.8598	0	0
BB1191		putative outer membrane protein	transporter activity	transport	-2.92382	0.0328384	1.94772	0.275592	negative	-7.17249	0	2.18432
BB1192		conserved hypothetical protein		Conserved in organism other than E. coli	-2.75291	0.0398463	1.12437	0.115786
BB1193	arsR	probable ArsR-family transcription regulator	transcription factor activity	Global Regulatory Functions	-1.64201	0.112527	-1.12507	0.031114
BB1194	arsB, arsF	arsenical pump membrane protein	arsenite transporter activity		-2.3595	0.0173799	NA	NA	negative	-4.01454	0	10.3932
BB1195		putative exported protein		Periplasmic/ Exported/ Lipoprotein	-1.73797	0.133668	-1.09505	0.0135
BB1196		conserved hypothetical protein		metabolism	NA	NA	NA	NA
BB1197		hypothetical protein		Unknown proteins, no known homologs	-1.46021	0.101302	-1.0664	0.011348
BB1198		putative TetR-family transcriptional regulator	transcription factor activity	regulation of transcription, DNA-dependent	-2.62876	0.0826544	-1.19346	0.042041
BB1199		probable acyl-CoA dehydrogenase	acyl-CoA dehydrogenase activity	electron transport	NA	NA	1.34315	NA
BB1200		probable short-chain dehydrogenase	oxidoreductase activity	metabolism	-1.47029	0.16342	-1.33786	0.107631
BB1201	sugE	putative chaperone			-1.68637	0.115612	-1.31817	0.0891603
BB1202		putative TetR-family transcriptional regulator	transcription factor activity	regulation of transcription, DNA-dependent	-1.84665	0.150738	-1.39223	0.0884162
BB1203		conserved hypothetical protein		Conserved in organism other than E. coli	-2.5	0.0208227	-1.13676	0.0155
BB1204		LysR-family transcriptional regulator	transcription factor activity	Global Regulatory Functions	-2.09636	0.0527907	-1.20342	0.0957431
BB1205		hypothetical protein		Unknown proteins, no known homologs	-2.33349	0.0320348	1.11574	0.0483443	negative	-5.00969	0	7.19671
BB1206		putative exported protein		Periplasmic/ Exported/ Lipoprotein	-2.93234	0.0700613	1.41421	0.279526	negative	-4.20912	0	9.73288
BB1207		putative plasmid-related protein	nucleotidyltransferase activity		-1.74384	0.0532034	1.01929	0.0656531
BB1208		methyl-accepting chemotaxis protein	signal transducer activity	Chemotaxis, motility	NA	NA	1.46768	0.0430555
BB1209		probable LysR-family transcriptional regulator	transcription factor activity	Global Regulatory Functions	-1.2996	0.289699	1.06244	0.0536602
BB1210		putative exported protein		Periplasmic/ Exported/ Lipoprotein	-1.51248	0.182	-1.05423	0.0522632
BB1211		putative membrane protein	catalytic activity	metabolism	-1.90869	0.0839901	1.08452	0.136871
BB1212		putative exported protein		Periplasmic/ Exported/ Lipoprotein	-1.85277	0.105349	-1.09081	0.153793
BB1213		putative membrane protein		Cell envelope	-2.42523	0.217532	1.26091	0.093
BB1214		putative exported protein		Periplasmic/ Exported/ Lipoprotein	-1.94563	0.24034	1.13807	0.022
BB1215		probable thiamine pyrophosphate dependentenzyme		metabolism	-2.04953	0.014113	-1.0854	0.0574289	negative	-6.05058	0	4.42575
BB1216		probable aldehyde dehydrogenase	oxidoreductase activity	metabolism	-2.26924	0.0196023	-1.01468	0.0627287
BB1217		conserved hypothetical protein		metabolism	-2.29724	0.0145	1.04162	0.064
BB1218		probable enoyl-CoA dehydratase	catalytic activity	metabolism	-1.05931	0.977	NA	NA
BB1219		LysR-family transcriptional regulator	transcription factor activity	Global Regulatory Functions	NA	NA	-1.51655	0.0135
BB1220		putative membrane protein		Cell envelope	NA	NA	1.49543	NA
BB1221		hypothetical protein		Unknown proteins, no known homologs	-1.56913	0.027	-1.0848	0.0565155
BB1222		hypothetical protein		Unknown proteins, no known homologs	-1.98089	0.148199	1.07513	0.165979
BB1223		putative acetyltransferase	N-acetyltransferase activity		-3.22276	NA	NA	NA
BB1224	aadA4	adenyltransferase	nucleotidyltransferase activity		-1.5296	0.0229948	-1.09232	0.0238131
BB1225		probable amidase	amidase activity		-1.23723	0.282794	1.18046	0.0605645
BB1226		putative membrane protein		Cell envelope	NA	NA	NA	NA
BB1227		putative membrane protein		Cell envelope	-1.22682	NA	NA	NA
BB1228		putative extracellular solute-binding protein		transport	NA	NA	NA	NA
BB1229		2-hydroxychromene-2-carboxylate isomerase	protein disulfide oxidoreductase activity		NA	NA	NA	NA
BB1230		putative cyclase			-3.63127	0.0225	-1.1507	0.0644903
BB1231		conserved hypothetical protein		Conserved in organism other than E. coli	-1.84767	0.196	-1.00408	0.143
BB1232		conserved hypothetical protein		Conserved in organism other than E. coli	-1.4204	0.156256	1.0731	0.0966238
BB1233		conserved hypothetical protein		Conserved in organism other than E. coli	-1.63496	0.115439	-1.06448	0.0203825
BB1234	ada	O6-methylguanine-DNA methyltransferase	transcription factor activity	Global Regulatory Functions	-1.1956	0.0709656	-1.15951	0.0005
BB1235		DNA-3-methyladenine glycosylase 1	DNA binding	carbohydrate metabolism	-1.46329	0.0922093	-1.39716	0.0446449
BB1236		putative glyxalase			-1.24259	0.0628393	-1.39321	0.023
BB1237		putative phosphoesterase	hydrolase activity		-1.64244	0.0675903	-1.1787	0.0761935
BB1238	cioA, qxtA	cytochrome oxidase subunit I	oxidoreductase activity	electron transport	NA	NA	-1.41117	NA
BB1239	cioB, qxtB	cytochrome oxidase subunit II		electron transport	-2.18207	0.152	1.20034	0.227086
BB1240		conserved hypothetical protein		Conserved in organism other than E. coli	-1.37929	0.190203	-1.05067	0.0186793
BB1241		putative aminotransferase	transcription factor activity	regulation of transcription, DNA-dependent	NA	NA	NA	NA
BB1242		hypothetical protein		Unknown proteins, no known homologs	-1.71822	0.0634884	1.01168	0.046133
BB1243	ttrA	tetrathionate reductase subunit A	oxidoreductase activity		-1.45936	0.115141	-1.05715	0.038095
BB1244	ttrC	tetrathionate reductase subunit C			-1.09282	0.329429	1.31802	0.0625918
BB1245	ttrB	tetrathionate reductase subunit B	electron transporter activity	electron transport	-1.83352	0.13285	-1.04371	0.209875
BB1246		putative exported protein	calcium ion binding	Periplasmic/ Exported/ Lipoprotein	-1.70049	0.0865	-1.00459	0.0165
BB1247		putative hydrolase	hydrolase activity		-1.18245	0.105252	-1.2168	0.0467217
BB1248	lon, lonD, bsgA	ATP-dependent protease La	ATP-dependent peptidase activity	Folding and Ushering	1.2552	0.221381	-2.33412	0.0236432
BB1249		heat shock protein	heat shock protein activity	Folding and Ushering	1.22315	0.198082	-1.8394	0.035493
BB1250		putative membrane protein		Cell envelope	NA	NA	NA	NA
BB1251		putative exported protein		Periplasmic/ Exported/ Lipoprotein	-2.48763	0.0727835	NA	NA	negative	-3.82927	0	11.0346
BB1252		LysR-family transcriptional regulator	transcription factor activity	Global Regulatory Functions	-1.14657	0.18124	-1.64167	0.0221623
BB1253		conserved hypothetical protein		Conserved in organism other than E. coli	-1.39711	0.0275	-1.39815	0.0055
BB1254	add	adenosine deaminase	adenosine deaminase activity	purine ribonucleoside monophosphate biosynthesis	-1.30618	0.039	-1.09444	0.069
BB1255		putative exported protein		Periplasmic/ Exported/ Lipoprotein	NA	NA	-1.02765	0.0025
BB1256		putative dimethylmenaquinone methyltransferase	methyltransferase activity		NA	NA	-1.02926	0.0967281
BB1257		conserved hypothetical protein		Conserved in organism other than E. coli	-1.94412	0.0742132	1.11675	0.0430213
BB1258		putative transcriptional regulator	DNA binding	regulation of transcription, DNA-dependent	-1.70366	0.12762	-1.38537	0.0376497
BB1259		putative 2-nitropropane dioxygenase	2-nitropropane dioxygenase activity	electron transport	-1.36803	0.129246	-1.06028	0.169033
BB1260		probable LysR-family transcriptional regulator	transcription factor activity	Global Regulatory Functions	-1.56218	0.149482	-1.56598	0.0140475
BB1261		putative membrane protein		Cell envelope	-1.7188	0.122218	-1.37378	0.0703858
BB1262		probable AraC-family transcriptional regulator	transcription factor activity	Global Regulatory Functions	-2.28783	0.0390694	-1.0415	0.0484946
BB1263		putative lipoprotein	N-acetylglucosamine metabolism	metabolism	-1.66171	0.0745	-1.17753	0.1845
BB1264		conserved hypothetical protein		Conserved in organism other than E. coli	-1.10677	0.0577179	-1.54087	0.0548701
BB1265		conserved hypothetical protein		Conserved in organism other than E. coli	-1.1922	0.126697	-1.31979	0.0784014
BB1266		conserved hypothetical protein		Conserved in organism other than E. coli	-1.64378	0.0555405	1.17056	0.003
BB1267		conserved hypothetical protein		Conserved in organism other than E. coli	-1.3917	0.0859214	1.0736	0.0210337
BB1268	ilvA	threonine dehydratase biosynthetic	threonine ammonia-lyase activity	isoleucine biosynthesis	NA	NA	1.11244	0.18573
BB1269		putative membrane protein		Cell envelope	-1.56085	0.0917321	1.07589	0.0754756
BB1270		putative ArsR-family transcriptional regulator	transcription factor activity	Global Regulatory Functions	NA	NA	-1.00102	0.043
BB1271		putative acyl-CoA dehydrogenase	acyl-CoA dehydrogenase activity	electron transport	NA	NA	1.37665	NA
BB1272		conserved hypothetical protein		Conserved in organism other than E. coli	NA	NA	1.28832	NA
BB1273		putative exported protein		Periplasmic/ Exported/ Lipoprotein	NA	NA	-2.33412	NA
BB1274		putative LysR-family transcriptional regulator	transcription factor activity	Global Regulatory Functions	-1.72293	0.154467	-1.09242	0.074461
BB1275		putative racemase		metabolism	NA	NA	NA	NA
BB1276		putative integral membrane protein	transporter activity	transport	-1.45767	0.0869723	-1.8032	0.0428512
BB1277		putative LysR-family transcriptional regulator	transcription factor activity	Global Regulatory Functions	-1.33986	0.0959673	-1.91821	0.0125
BB1278		conserved hypothetical protein		Conserved in organism other than E. coli	-1.4914	0.0640186	-1.23279	0.029
BB1279		conserved hypothetical protein		Conserved in organism other than E. coli	-1.16055	0.0836461	-1.1619	0.091334
BB1280		putative exported protein	S-adenosylmethionine-dependent methyltransferase activity	Periplasmic/ Exported/ Lipoprotein	1.44525	0.714996	-1.74723	0.233195
BB1281		two component system sensor kinase	two-component sensor molecule activity	Global Regulatory Functions	-1.72529	0.101633	1.2033	0.0151623
BB1282		two component system response regulator	two-component response regulator activity	Global Regulatory Functions	-1.82719	0.0508543	-1.01207	0.0610811
BB1283	cyoA	putative ubiquinol oxidase polypeptide II	copper ion binding	electron transport	-1.92957	0.0607962	1.13858	0.012816
BB1284	cyoB	ubiquinol oxidase polypeptide I	cytochrome-c oxidase activity	electron transport	-1.83888	0.024504	1.11599	0.0532187
BB1285	cyoC	cytochrome O ubiquinol oxidase	cytochrome-c oxidase activity	electron transport	-1.40807	0.169297	1.38579	0.0467333
BB1286	cyoD	cytochrome 0 ubiquinol oxidase			-1.99821	0.0744731	1.27538	0.0208262
BB1287		putative regulatory protein	transcription factor activity	Global Regulatory Functions	-2.05288	0.063857	-1.22057	0.0838441
BB1288		putative transport protein	transporter activity	transport	-2.23743	NA	NA	NA
BB1289		putative integral membrane protein		Cell Envelope	-1.89789	NA	-1.77079	0.103408
BB1290		conserved hypothetical protein		Conserved in organism other than E. coli	-1.87453	NA	NA	NA
BB1291		conserved hypothetical protein		Conserved in organism other than E. coli	1.82551	1.09399	-3.38488	0.032
BB1292		putative exported protein		Periplasmic/ Exported/ Lipoprotein	2.36927	0.8905	-3.33145	0.0664237
BB1293		putative lipoprotein		Periplasmic/ Exported/ Lipoprotein	NA	NA	1.15702	0.168014
BB1294	bfrG	putative TonB-dependent receptor	receptor activity	transport	NA	NA	NA	NA
BB1295		putative exported protein		Periplasmic/ Exported/ Lipoprotein	NA	NA	-1.14535	NA
BB1296		putative chromate transport protein	chromate transporter activity	chromate transport	-1.75333	0.105249	-1.32928	0.0898638
BB1297		putative lipoprotein	metalloendopeptidase activity	Folding and Ushering	-1.65025	0.0887152	-1.15848	0.0919251
BB1298		conserved hypothetical protein		Conserved in organism other than E. coli	-2.72316	0.0504922	1.29137	0.021	negative	-4.37098	0	9.19527
BB1299		putative exported protein		Periplasmic/ Exported/ Lipoprotein	-2.50311	0.0395936	-1.04899	0.0540108	negative	-5.09091	0	6.95786
BB1300		conserved hypothetical protein		Conserved in organism other than E. coli	-1.46553	0.00983446	-1.12475	0.0254963
BB1301		putative exported protein		Periplasmic/ Exported/ Lipoprotein	-1.0647	0.0680892	-1.34471	0.0339374
BB1302		putative RNA polymerase sigma factor	transcription factor activity	Global Regulatory Functions	-1.01603	0.187346	-1.39026	0.0965
BB1303		conserved hypothetical protein		Conserved in organism other than E. coli	1.0356	0.34682	-1.07611	0.126465
BB1304		conserved hypothetical protein		Conserved in organism other than E. coli	-1.38728	NA	1.03689	0.185973
BB1305		putative oxidoreductase	oxidoreductase activity	metabolism	-1.71032	0.0663171	1.0868	0.0646407
BB1306		exported SurF1-family protein		Periplasmic/ Exported/ Lipoprotein	-2.1321	0.0496273	1.00888	0.109341
BB1307		cytochrome ubiquinol oxidase subunit IV			-2.29189	0.0918202	1.19416	0.0320738
BB1308		cytochrome ubiquinol oxidase subunit III	cytochrome-c oxidase activity	electron transport	-1.62439	0.0735951	-1.12219	0.125629
BB1309		cytochrome ubiquinol oxidase subunit I	cytochrome-c oxidase activity	electron transport	-1.61995	0.0678099	1.02868	0.0513718
BB1310		putative ubiquinol oxidase subunit II	cytochrome-c oxidase activity	electron transport	-2.16866	0.0857898	1.08376	0.0005
BB1311		putative membrane transport protein	transporter activity	transport	-1.30578	0.143275	-1.42961	0.012
BB1312		conserved hypothetical protein		Conserved in organism other than E. coli	-1.84529	0.051814	-1.0765	0.117043
BB1313		putative amino-acid dehydratase	amino acid metabolism	metabolism	NA	NA	-1.05914	0.074
BB1314		putative membrane protein		Cell envelope	-1.94864	0.0478421	1.06117	0.117167
BB1315		putative universal stress protein		Folding and Ushering	1.36032	0.318089	-1.43638	0.119248
BB1316		putative chromate transporter	chromate transporter activity	transport	NA	NA	1.01015	0.112
BB1317		putative chromate transporter	chromate transporter activity	transport	-1.96348	0.0285	-1.32215	0.0184797
BB1318		conserved hypothetical protein	S-adenosylmethionine-dependent methyltransferase activity	Conserved in organism other than E. coli	-2.11195	0.0995	-1.18035	0.0185
BB1319	fdsD	putative NAD-dependent formate dehydrogenasedelta subunit	oxidoreductase activity	metabolism	-1.96752	0.062373	1.0934	0.0799448
BB1320	fdhD, fdsC	formate dehydrogenase associated protein	formate dehydrogenase activity	electron transport	-2.59016	0.100416	1.24907	0.155818
BB1321	fdsA	NAD-dependent formate dehydrogenase alphasubunit	electron transporter activity	electron transport	-2.32512	0.0751569	-1.08182	0.0005
BB1322	fdsB	NAD-dependent formate dehydrogenase betasubunit	NADH dehydrogenase (ubiquinone) activity	mitochondrial electron transport, NADH to ubiquinone	-2.29566	NA	-1.26228	0.0576551
BB1323	fdsG	NAD-dependent formate dehydrogenase gammasubunit	NADH dehydrogenase (ubiquinone) activity	mitochondrial electron transport, NADH to ubiquinone	-1.87747	0.0656556	-1.07415	0.139865
BB1324		putative molybdenum-binding protein	transcription factor activity	Global Regulatory Functions	-2.23743	0.0372836	-1.08272	0.0570356	negative	-4.18308	0	9.82038
BB1325	moaA	molybdenum cofactor biosynthesis protein	catalytic activity		-1.70974	0.0822238	-1.06804	0.0777896
BB1326	moeA	molybdopterin cofactor biosynthesis protein		Mo-molybdopterin cofactor biosynthesis	-1.92661	0.0302241	1.06701	0.0489813
BB1327	moaB	molybdenum cofactor biosynthesis protein		Mo-molybdopterin cofactor biosynthesis	-1.77839	0.0292229	1.2231	0.109228
BB1328	moaE	molybdopterin converting factor		Mo-molybdopterin cofactor biosynthesis	-1.75113	0.137122	1.43147	0.20245
BB1329	moaD	molybdopterin converting factor		sulfur metabolism	-1.71998	0.0278181	1.20533	0.0111084
BB1330	moaC	molybdenum cofactor biosynthesis protein		Mo-molybdopterin cofactor biosynthesis	-1.61995	0.0185135	1.09915	0.0176383
BB1331		putative exported protein		Periplasmic/ Exported/ Lipoprotein	-1.63178	0.0446038	-1.0415	0.0138466
BB1332		putative hydrolase	hydrolase activity		-1.12851	0.220624	-1.14602	0.0823777
BB1333		putative lipoprotein		Periplasmic/ Exported/ Lipoprotein	NA	NA	-1.29605	0.0541479
BB1334		AhpC			1.06763	0.302201	-1.2429	0.0860334
BB1335		putative membrane transport protein	transporter activity	transport	-2.26464	NA	-1.11636	0.0973539
BB1336		putative exported protein		Periplasmic/ Exported/ Lipoprotein	-1.77525	0.176519	1.26015	0.075905
BB1337		biotin synthase	biotin biosynthesis	metabolism	-2.80474	0.0773267	1.57716	0.188254	negative	-4.93518	0	7.41901
BB1338		putative exported protein		Periplasmic/ Exported/ Lipoprotein	-5.2644	0.0671355	1.87513	0.0886764	negative	-4.39125	0	9.12876
BB1339		putative exported protein		Periplasmic/ Exported/ Lipoprotein	-3.48044	0.0298024	2.02665	0.184835	negative	-8.83428	0	0.152765
BB1340		putative TetR-family transcriptional regulator	transcription factor activity	Global Regulatory Functions	NA	NA	1.66548	0.0025
BB1341		carboxyvinyl-carboxyphosphonatephosphorylmutase	carboxyvinyl-carboxyphosphonate phosphorylmutase activity	metabolism	NA	NA	NA	NA
BB1342	acnA, acn	aconitate hydratase	RNA binding	metabolism	NA	NA	NA	NA
BB1343		dihydroorotase-like protein	allantoinase activity		-1.57948	NA	-1.03141	0.0784368
BB1344		probable hydrolase	hydrolase activity	metabolism	NA	NA	NA	NA
BB1345		conserved hypothetical protein		Conserved in organism other than E. coli	NA	NA	NA	NA
BB1346		putative exported protein		Periplasmic/ Exported/ Lipoprotein	NA	NA	NA	NA
BB1347		putative fumarate reductase flavoproteinsubunit	succinate dehydrogenase activity	electron transport	NA	NA	NA	NA
BB1348		putative exported protein		Periplasmic/ Exported/ Lipoprotein	-1.49806	0.144051	-1.32215	0.086
BB1349		putative exported protein		Periplasmic/ Exported/ Lipoprotein	-1.61138	0.006	1.04112	0.0025
BB1350		conserved hypothetical protein		Conserved in organism other than E. coli	-1.83051	0.0525	-1.11932	0.011
BB1351		probable GntR-family transcriptional regulator	transcription factor activity	Global Regulatory Functions	-1.75664	0.016	-1.27591	NA
BB1352		putative aldo			-1.60214	0.087	1.00457	0.046457
BB1353	lnt, cutE	putative apolipoprotein N-acyltransferase	N-acyltransferase activity	nitrogen metabolism	-2.07662	0.0322666	1.09205	0.10261	negative	-3.52075	0	12.1238
BB1354	corC	magnesium and cobalt efflux protein			-2.01261	0.0532577	1.22893	0.0745458
BB1355		conserved hypothetical protein		Conserved in organism other than E. coli	-2.59337	0.034052	1.1269	0.0270123	negative	-4.50078	0	8.77263
BB1356		PhoH-like protein	ATP binding	cellular response to phosphate starvation	-1.69676	0.0678949	-1.26363	0.0616718
BB1357		conserved hypothetical protein		Conserved in organism other than E. coli	-1.42867	0.0856481	-1.15951	0.0215
BB1358		putative membrane protein		Cell envelope	-2.98723	0.0419136	NA	NA
BB1359	secF	protein-export membrane protein	protein translocase activity	transport	-1.56938	0.0799268	-1.04732	0.0673962
BB1360	secD	protein-export membrane protein	protein translocase activity	transport	-1.83385	0.0470938	1.14112	0.14478
BB1361		putative secreted protein			-1.04685	0.102762	-1.14969	0.0637408
BB1362	tgt	queuine tRNA-ribosyltransferase	queuine tRNA-ribosyltransferase activity	translation	-1.59959	0.0464921	-1.06679	0.038602
BB1363	queA	S-adenosylmethionine:tRNAribosyltransferase-isomerase	transferase activity	translation	-1.22488	0.0953196	-1.07094	0.0553991
BB1364		probable D-alanyl-D-alanine carboxypeptidase	serine carboxypeptidase activity	proteolysis and peptidolysis	NA	NA	NA	NA
BB1365	upp, uraP	uracil phosphoribosyltransferase	uracil phosphoribosyltransferase activity	uracil salvage	-1.41771	0.146498	-2.83453	0.0923278
BB1366	prn	pertactin precursor	protein binding	cell adhesion	3.68151	1.15203	-1.6702	0.068162	positive	8.29228	0	0.547379
BB1367	cysG	siroheme synthase	uroporphyrin-III C-methyltransferase activity	porphyrin biosynthesis	-1.23253	0.263717	-1.10117	0.4525
BB1368		putative membrane protein		Cell envelope	-1.39886	0.115052	-1.0884	0.071
BB1369		putative membrane protein		Cell envelope	1.30085	0.102154	-2.09241	0.0159132
BB1370		putative membrane protein		Cell envelope	1.11735	0.339568	-1.28213	0.0215885
BB1371		hypothetical protein		Unknown proteins, no known homologs	-1.11302	0.279754	-1.12926	0.0257306
BB1372	ubiD	3-octaprenyl-4-hydroxybenzoate carboxy-lyase	lyase activity		-1.62439	0.0407927	-1.00408	0.0430368
BB1373		putative transglycosylase			-1.57478	0.0475643	1.13756	0.0885
BB1374		probable aminotransferase	transaminase activity	biosynthesis	-1.61666	0.115357	1.25448	0.159971
BB1375		conserved hypothetical protein		Conserved in organism other than E. coli	-1.27894	0.0621486	1.07284	0.0256202
BB1376	maeB	NADP-dependent malic enzyme	malate dehydrogenase (oxaloacetate-decarboxylating) (NADP+) activity	metabolism	-1.85997	0.103848	1.25144	0.0885218
BB1377		conserved hypothetical protein	catalytic activity	Conserved in organism other than E. coli	-2.05826	0.0254134	1.3302	0.112043	negative	-3.80483	0	11.12
BB1378		conserved hypothetical protein		Conserved in organism other than E. coli	-2.30778	0.0263861	1.37208	0.0368069	negative	-5.44834	0	5.95059
BB1379		conserved hypothetical protein		Conserved in organism other than E. coli	-1.8586	0.0463916	-1.01416	0.100053
BB1380	tktA, tkt	transketolase 1	transketolase activity		-1.22413	0.0869256	-1.07591	0.0886355
BB1381	gap, hexC	glyceraldehyde-3-phosphate dehydrogenase	glycolysis	metabolism	1.11149	0.143247	-1.77318	0.00818026
BB1382	pgk	phosphoglycerate kinase	glycolysis	metabolism	-1.19588	0.19557	-1.15985	0.0552062
BB1383	fabI, envM	enoyl-[acyl-carrier-protein] reductase [NADH]	enoyl-[acyl-carrier protein] reductase (NADH) activity	metabolism	-2.10841	0.111334	1.11193	0.161864
BB1384	ackA, ack	acetate kinase	acetate kinase activity	organic acid metabolism	-2.0848	0.0779104	1.4165	0.109739
BB1385		phosphate acetyl	acyltransferase activity	metabolism	-2.42699	0.0140469	1.68604	0.174678	negative	-10.3638	0	0
BB1386		conserved hypothetical protein		Conserved in organism other than E. coli	-1.95357	0.0284469	1.30102	0.17647
BB1387		probable glutathione S-transferase	transferase activity		-1.28351	0.0541779	-1.10612	0.0535436
BB1388		conserved hypothetical protein		Conserved in organism other than E. coli	-1.4214	0.165653	-1.0034	0.119181
BB1389		conserved hypothetical protein		Conserved in organism other than E. coli	-1.49007	0.164325	1.07081	0.0282736
BB1390		putative acetyltransferase	N-acetyltransferase activity		-1.51067	0.0245502	-1.13218	0.0979923
BB1391	cbpA	curved DNA-binding protein	DNA binding	Folding and Ushering	1.41144	0.207061	-2.08908	0.0639512
BB1392		conserved hypothetical protein		Conserved in organism other than E. coli	1.13705	0.261794	-1.29904	0.0261769
BB1393		putative membrane protein		transport	-1.26082	0.0701557	-1.52536	0.127743
BB1394		putative membrane protein		Cell envelope	NA	NA	-1.55485	0.1045
BB1395	pitA, pit	probable phosphate transporter	inorganic phosphate transporter activity	transport	-2.68922	0.132737	1.65635	0.0185
BB1396	mog, mogA, chlG	molybdopterin biosynthesis protein		Mo-molybdopterin cofactor biosynthesis	-1.5003	0.0507063	-1.18722	0.0327431
BB1397		putative exported protein		Periplasmic/ Exported/ Lipoprotein	-1.72145	0.07021	1.03096	0.0420803
BB1398		putative peptidase	metalloendopeptidase activity	proteolysis and peptidolysis	-1.49985	0.0494049	1.1066	0.067
BB1399		hypothetical protein		Unknown proteins, no known homologs	-3.14514	0.0737267	1.83046	0.0610533	negative	-4.4059	0	9.08082
BB1400	infA	translation initiation factor IF-1	RNA binding	translation	-2.91365	0.0509021	1.6764	0.0762413	negative	-4.96433	0	7.3317
BB1401		conserved hypothetical protein	carbon-sulfur lyase activity	metabolism	-2.50561	0.0752836	1.19467	0.020762	negative	-3.33871	0	12.774
BB1402		formate dehydrogenase	formate dehydrogenase activity	L-serine biosynthesis	-1.58922	0.0685	-1.07007	0.0015
BB1403		conserved hypothetical protein		Conserved in organism other than E. coli	-1.70794	0.0693321	-1.14358	0.0216513
BB1404		putative transporter protein		transport	-1.83854	0.0065	-1.14802	0.023
BB1405	fmdA	formamidase	formamidase activity	metabolism	NA	NA	NA	NA
BB1406		putative LuxR-family transcriptional regulator	transcription factor activity	Global Regulatory Functions	-1.46259	0.0790192	-1.25959	0.031
BB1407		conserved hypothetical protein		Conserved in organism other than E. coli	-3.19105	0.089922	1.0835	0.0837669	negative	-3.725	0	11.4002
BB1408	fba, fda, cbbA	fructose-bisphosphate aldolase	fructose-bisphosphate aldolase activity	metabolism	1.09886	0.0940488	-1.523	0.0453401
BB1409		conserved hypothetical protein	carbon-sulfur lyase activity	metabolism	-2.29671	0.0362261	-1.10015	0.0466667
BB1410	purC	phosphoribosylaminoimidazole-succinocarboxamidesynthase	phosphoribosylaminoimidazolesuccinocarboxamide synthase activity	purine nucleotide biosynthesis	-1.5553	0.150756	-1.15951	0.108355
BB1411		conserved hypothetical protein		Conserved in organism other than E. coli	1.04903	NA	NA	NA
BB1412		putative DNA-binding protein	DNA binding	Global Regulatory Functions	NA	NA	-1.27591	NA
BB1413		putative membrane protein		Cell envelope	-3.17794	0.0266266	2.05508	0.125614	negative	-8.94359	0	0.0650969
BB1414		putative membrane protein		Cell envelope	-1.96463	0.0274445	1.11218	0.0924288
BB1415	purE	phosphoribosylaminoimidazole carboxylasecatalytic subunit	phosphoribosylaminoimidazole carboxylase activity	'de novo' IMP biosynthesis	-1.95966	0.0462172	-1.0881	0.0132122
BB1416	purK	phosphoribosylaminoimidazole carboxylase ATPasesubunit	phosphoribosylaminoimidazole carboxylase activity	'de novo' IMP biosynthesis	-1.43193	0.121361	-1.03985	0.033856
BB1417		conserved hypothetical protein		Conserved in organism other than E. coli	-1.37551	0.0765017	-1.05914	0.0696168
BB1418		putative extracellular solute-binding protein	transporter activity	transport	-2.05246	0.0528335	1.15761	0.10135
BB1419		putative transcriptional regulator	DNA binding	regulation of transcription, DNA-dependent	-2.83639	0.112158	1.10609	0.0025
BB1420		putative arginase	catalytic activity		-2.27283	0.0974723	-1.0152	0.0366774
BB1421		putative amino acid-binding periplasmic protein	transporter activity	transport	-2.20273	0.152789	-1.13153	0.0305
BB1422		putative inner membrane component ofbinding-protein-dependent transport system	transporter activity	transport	-1.45282	0.1935	-1.09202	0.0534743
BB1423		putative ATP-binding component of ABCtransporter	ATP-binding cassette (ABC) transporter activity	transport	-1.83854	0.0603938	-1.05971	0.0065
BB1424		putative thiamine-pyrophosphate-requiringenzyme		metabolism	-1.92036	0.121856	1.39365	0.021704
BB1425		conserved hypothetical protein	oxidoreductase activity	metabolism	-1.75894	0.215278	1.37513	0.100439
BB1426	gcdH	glutaryl-CoA dehydrogenase	glutaryl-CoA dehydrogenase activity	electron transport	-1.37335	0.0438546	1.11371	0.109039
BB1427	ilvG	putative acetolactate synthase large subunit	acetolactate synthase activity		-1.57614	0.0835478	1.03223	0.0840886
BB1428		probable LysR-familyt ranscriptional regulator	transcription factor activity	Global Regulatory Functions	-1.34362	0.0674949	-1.13349	0.130167
BB1429	xerD, xprb	integrase	DNA binding	DNA recombination	-1.23223	NA	-1.05838	0.0154524
BB1430		conserved hypothetical protein		Conserved in organism other than E. coli	NA	NA	-1.40714	NA
BB1431		conserved hypothetical protein	hydrolase activity, acting on glycosyl bonds		-1.7765	0.211781	1.78985	0.248313
BB1432		conserved hypothetical protein		Conserved in organism other than E. coli	-1.77196	0.167501	1.10533	0.0823148
BB1433	pbpG	probable D-alanyl-D-alanine carboxypeptidase	serine carboxypeptidase activity	proteolysis and peptidolysis	-1.128	0.0402258	-1.08064	0.0747546
BB1434		hypothetical protein		Unknown proteins, no known homologs	-1.23495	NA	-1.15543	0.0245
BB1435		putative membrane protein	transporter activity	transport	-1.8078	0.131981	-1.07768	0.097
BB1436		conserved hypothetical protein		Conserved in organism other than E. coli	NA	NA	1.2802	NA
BB1437		putative nuclease	DNA binding	DNA repair	-2.05204	0.0331528	1.17944	0.0373438	negative	-3.6222	0	11.7634
BB1438	dnaX, dnaZ, dnazX	DNA polymerase III subunit Tau	nucleotide binding	DNA replication	-1.35003	0.0978406	1.03401	0.120611
BB1439		conserved hypothetical protein		Conserved in organism other than E. coli	-1.22101	0.150152	-1.00459	0.0493601
BB1440	recR	recombination protein RecR	nucleic acid binding	DNA repair	-1.28927	0.151177	1.03503	0.0208387
BB1441		conserved hypothetical protein		metabolism	-2.35287	0.0740995	-1.14535	0.0724718	negative	-3.96325	0	10.5696
BB1442		putative exported protein		Periplasmic/ Exported/ Lipoprotein	-2.37651	0.0827472	1.08731	0
BB1443		probable ATP-binding ABC transporter protein	ATP-binding cassette (ABC) transporter activity	transport	-2.44766	0.0653966	1.26142	0.0970571	negative	-3.56222	0	11.9762
BB1444		probable transmembrane permease ABC transporterprotein	transporter activity	transport	-2.61115	0.086899	1.24492	0.160126
BB1445	talB	transaldolase B	pentose-phosphate shunt	metabolism	-1.73153	0.090086	1.08393	0.070525
BB1446	carA, pyrA	carbamoyl-phosphate synthase small chain	carbamoyl-phosphate synthase (glutamine-hydrolyzing) activity	nitrogen metabolism	-1.41301	0.0217715	-1.01303	0.0422861
BB1447	carB, pyrA	carbamoyl-phosphate synthase large chain	IMP cyclohydrolase activity	purine nucleotide biosynthesis	-1.73123	0.068837	1.28477	0.163661
BB1448		probable short chain dehydrogenase	oxidoreductase activity	metabolism	-2.01568	0.0211981	1.16371	0.0675677	negative	-4.3421	0	9.29038
BB1449	gpmB	probable phosphoglycerate mutase 2	phosphoglycerate mutase activity	metabolism	-2.27489	0.0921038	1.21675	0.0388212
BB1450		LysR-family transcriptional regulator	transcription factor activity	Global Regulatory Functions	-1.682	0.0488287	1.07005	0.0236749
BB1451		probable ATP-binding component of ABCtransporter	ATP-binding cassette (ABC) transporter activity	transport	-2.46175	0.113496	1.15601	0.0583733
BB1452		probable permease component of ABC transporter	transporter activity	transport	-1.7493	0.053	1.08325	0.015
BB1453		putative regulatory lipoprotein	transporter activity	transport	-2.07559	0.082335	-1.00254	0.0560751
BB1455		putative xanthine	transporter activity	transport	-2.06468	0.0756336	1.02843	0.0788363
BB1456		methyl-accepting chemotaxis protein	signal transducer activity	Chemotaxis, motility	-1.97389	0.0647163	-1.01468	0.0544172
BB1457	greA	transcription elongation factor	DNA binding	Global Regulatory Functions	-1.90112	0.0457557	1.14873	0.0891165
BB1458		conserved hypothetical protein		Conserved in organism other than E. coli	-1.41381	0.114783	-1.3266	0.0691406
BB1459	rrmJ, ftsJ, mrsF	ribosomal RNA large subunit methyltransferase j	methyltransferase activity		-2.11328	0.0450651	1.16117	0.120501
BB1460	ftsH, hflB, mrsC, tolZ	cell division protein	metalloendopeptidase activity	cytokinesis	-1.27894	0.0472544	-1.07036	0.155068
BB1461	folP, dhpS	dihydropteroate synthase	dihydropteroate synthase activity	folic acid and derivative biosynthesis	-1.4994	0.173411	1.21117	0.0794072
BB1462	mrsA	phosphoglucomutase	intramolecular transferase activity, phosphotransferases	carbohydrate metabolism	-2.15218	0.0630242	1.26777	0.0307608
BB1463		conserved hypothetical protein		Conserved in organism other than E. coli	-1.5505	0.0737321	1.02614	0.0353303
BB1464	ppx	exopolyphosphatase	exopolyphosphatase activity		-1.84971	0.0753182	1.07411	0.0540648
BB1465	ppk	polyphosphate kinase	polyphosphate kinase activity	polyphosphate biosynthesis	-1.9903	0.024	1.14061	0.0095
BB1466	pstS, phoS	phosphate-binding periplasmic protein precursor	transporter activity	transport	-2.24417	0.0495452	1.2	0.024	negative	-4.74757	0	7.99174
BB1467	pstC, phoW	phosphate transport system permease protein	inorganic phosphate transporter activity	phosphate transport	-2.66598	0.0807735	1.12487	0.0117898	negative	-3.98922	0	10.4802
BB1468	pstA, phoT	phosphate transport system permease protein	inorganic phosphate transporter activity	phosphate transport	-2.27901	0.0544645	1.15888	0.0075	negative	-3.21805	0	13.2063
BB1469	pstB, phoT	phosphate transport ATP-binding protein	ATP-binding cassette (ABC) transporter activity	phosphate transport	-2.36282	0.0657563	-1.09202	NA
BB1470		conserved hypothetical protein	catalytic activity	Conserved in organism other than E. coli	-2.22554	0.142917	NA	NA
BB1471		putative exported protein		Periplasmic/ Exported/ Lipoprotein	-2.00459	NA	NA	NA
BB1472		conserved hypothetical protein		Conserved in organism other than E. coli	-1.63816	NA	-1.13153	0.0805
BB1473		putative oxidoreductase	oxidoreductase activity		-1.98089	0.0803441	-1.09262	0.0045
BB1474		putative DNA-binding protein	DNA binding		-1.68935	0.103265	-1.19249	0.0705266
BB1475		putative exported protein		Periplasmic/ Exported/ Lipoprotein	-1.22488	0.0550427	-1.32482	0.108696
BB1476		Putative gluconate dehydrogenase		metabolism	1.15863	0.231577	-1.58488	0.0332202
BB1477		Putative cytochrome C precursor	alcohol dehydrogenase activity	electron transport	-1.16688	0.0633611	-1.41931	0.0469787
BB1478		Putative carbonic anhydrase precursor	carbonate dehydratase activity	carbon utilization	-1.14665	0.0356686	-1.45066	0.0610178
BB1479		Putative regulatory protein	transcription factor activity	Global Regulatory Functions	-1.27311	0.0465522	-1.40313	0.0838779
BB1480	gbd	NAD-dependent 4-hydroxybutyrate dehydrogenase	iron ion binding	metabolism	1.08328	0.316125	-1.34885	0.0204792
BB1481		Putative ketoglutarate semialdehydedehydrogenase	phenylacetaldehyde dehydrogenase activity	metabolism	1.07419	0.309644	-1.30868	0.0566902
BB1482		Hypothetical protein		Unknown proteins, no known homologs	-1.21923	0.123259	1.00558	0.0697693
BB1483		Hypothetical protein		Unknown proteins, no known homologs	-1.53549	0.148628	1.15228	NA
BB1484		Putative branched-chain amino acid transporterATP-binding protein	ATP-binding cassette (ABC) transporter activity	transport	NA	NA	NA	NA
BB1485		Putative branched-chain amino acid transporterATP-binding protein	ATP-binding cassette (ABC) transporter activity	transport	-1.16783	0.19	1.0467	0.056
BB1486		Putative high-affinity branched-chain amino acidtransporter membrane protein	transporter activity	transport	-1.64297	NA	-1.87619	0.031
BB1487		Putative branched-chain amino acid transportermembrane protein	transporter activity	transport	NA	NA	-1.57726	0.0045
BB1488		Putative branched-chain amino acid transportersubstrate binding protein		transport	1.05172	0.9515	-1.25718	0.1075
BB1489		Putative high-affinity branched-chain amino acidtransporter ATP-binding protein	ATP-binding cassette (ABC) transporter activity	transport	-2.18777	0.0352633	1.01117	0.0899685	negative	-5.46742	0	5.89889
BB1490		Putative branched-chain amino acid transporterATP-binding protein	ATP-binding cassette (ABC) transporter activity	transport	-1.78819	0.0603608	1.04061	0.0177247
BB1491		Putative high-affinity branched-chain amino acidtransporter membrane protein	transporter activity	transport	-2.56374	0.0683041	1.00948	0.255003
BB1492		Putative high-affinity branched-chain amino acidtransporter membrane protein	transporter activity	transport	-1.98284	0.0766726	-1.05151	0.0401131
BB1493		Putative branched-chain amino acid transportersubstrate-binding protein		transport	-1.25908	0.22856	-1.54328	0.120066
BB1494		conserved hypothetical protein		Conserved in organism other than E. coli	-1.985	0.0829311	1.08629	0.236136
BB1495		Putative transcriptional regulator	DNA binding	regulation of transcription, DNA-dependent	-1.77965	0.252626	-1.45926	0.033
BB1496		Putative short chain dehydrogenase	oxidoreductase activity	metabolism	NA	NA	1.4203	NA
BB1497		putative exported protein		Periplasmic/ Exported/ Lipoprotein	NA	NA	1.00102	NA
BB1498		Putative hydrolase	hydrolase activity	metabolism	-1.44843	0.100195	-1.37762	0.0413501
BB1499		Putative monoxygenase	monooxygenase activity	electron transport	-1.17158	0.0536317	-1.45495	0.0334365
BB1500		Putative 3-hydroxybutyryl-CoA dehydrogenase	oxidoreductase activity	metabolism	-1.2311	0.0600574	-1.80403	0.024
BB1501		Putative enoyl-CoA hydratase	catalytic activity	metabolism	-1.51139	0.105982	-1.47676	0.0665482
BB1502		Putative L-carnitine dehydrogenase-like protein		metabolism	-1.26383	NA	NA	NA
BB1503		Putative ABC transport system, solute-bindingprotein		transport	NA	NA	1.0467	NA
BB1504		Putative ABC transport system, permease protein	transporter activity	transport	-1.00349	NA	NA	NA
BB1505		Putative ABC transport system, permease protein	transporter activity	transport	NA	NA	NA	NA
BB1506		Putative ABC transport system, ATP-bindingprotein	ATP-binding cassette (ABC) transporter activity	transport	NA	NA	NA	NA
BB1507		Putativa ABC transport system, ATP-bindingprotein	ATP-binding cassette (ABC) transporter activity	transport	NA	NA	NA	NA
BB1508		Putative amidase	amidase activity		NA	NA	NA	NA
BB1509		Conserved hypothetical protein		Conserved in organism other than E. coli	NA	NA	NA	NA
BB1510		Putative GntR-family transcriptional regulator	transcription factor activity	Global Regulatory Functions	-1.13028	0.160179	-1.57348	0.0326675
BB1511		Conserved hypothetical protein		Conserved in organism other than E. coli	NA	NA	NA	NA
BB1512		probable short chain dehydrogenase	oxidoreductase activity	metabolism	-2.19254	0.0811424	-1.49129	0.0415
BB1513		probable short chain dehydrogenase	oxidoreductase activity	metabolism	-1.71822	0.0270107	-1.058	0.0511387
BB1514		Putative ABC transport system, membrane protein		transport	-2.00979	0.0772314	1.0132	0.0564447
BB1515		Putative ABC transport system, membrane protein		transport	-1.59999	0.163685	1.01827	0.0221886
BB1516		Putative ABC transport system, solute-bindingprotein		transport	-1.74687	0.0912519	-1.08004	0.0192657
BB1517		Hypothetical protein		Unknown proteins, no known homologs	-1.85654	0.118153	1.05102	0.027112
BB1518		Putative hydrolase	hydrolase activity	metabolism	-2.45994	0.0280635	-1.07298	0.154
BB1519		Putative GntR-family transcriptional regulator	transcription factor activity	Global Regulatory Functions	-2.22969	0.105573	-1.23048	0.0427639
BB1520		Putative AsnC-family transcriptional regulator	transcription factor activity	Global Regulatory Functions	-1.54776	0.0193321	-1.08242	0.0326701
BB1521		Putative diaminopropionate ammonia-lyase	amino acid metabolism	metabolism	-1.47716	0.0475	-1.02711	0.053
BB1522		Putative peptidase	metallopeptidase activity	proteolysis and peptidolysis	-1.00379	0.0325	-1.33832	0.07
BB1523		Putative ABC transport system, substrate-bindingprotein	transporter activity	transport	NA	NA	NA	NA
BB1524		Putative ABC transport system, integral membraneprotein	transporter activity	transport	NA	NA	NA	NA
BB1525		Putative ABC transport system, integral membraneprotein	transporter activity	transport	NA	NA	NA	NA
BB1526		Putative ABC transport system, ATP-bindingprotein	ATP-binding cassette (ABC) transporter activity	transport	-1.61448	0.0485901	1.01472	0.0615
BB1527		Putative membrane protein		Cell envelope	-1.81515	0.0452371	-1.09566	0.084388
BB1528		Putative amino acid aminotransferase			-1.55002	0.0849825	-1.3042	0.0771831
BB1529		Putative dehydrogenase	oxidoreductase activity, acting on the CH-OH group of donors, NAD or NADP as acceptor	metabolism	NA	NA	NA	NA
BB1530		Putative amino acid hydrolase	metallopeptidase activity	proteolysis and peptidolysis	NA	NA	NA	NA
BB1531		Putative decarboxylase	racemase and epimerase activity, acting on amino acids and derivatives	metabolism	-1.4543	0.0163333	-1.06257	0.03
BB1532		putative aldolase	aldolase activity	metabolism	-1.6902	0.0160078	1.1066	0.035
BB1533		putative creatinine amidohydrolase	hydrolase activity		-1.69063	0.0773567	1.02183	0.0175
BB1534		putative exported protein		Periplasmic/ Exported/ Lipoprotein	-1.20131	0.076	-1.38635	0.0195
BB1535		putative exported protein		Periplasmic/ Exported/ Lipoprotein	NA	NA	NA	NA
BB1536		Putative LysR-family transcriptional regulator	transcription factor activity	Global Regulatory Functions	-1.28976	0.187835	-1.44693	0.0329706
BB1537		putative exported protein		Periplasmic/ Exported/ Lipoprotein	-1.76916	0.0986318	-1.15475	0.216111
BB1538		Putative membrane protein	cation transporter activity	potassium ion transport	-1.78736	0.0821831	1.07843	0.0492771
BB1539		Putative LysR-family transcriptional regulator	transcription factor activity	Global Regulatory Functions	-1.97855	0.0902186	1.01954	0.0540546
BB1540		Hypothetical protein		Unknown proteins, no known homologs	-1.53916	0.262609	-1.058	0.0239618
BB1541		Putative transferase	transferase activity		-2.3504	0.0674623	1.11438	0.110997
BB1542	metC	cystathionase beta-lyase	amino acid metabolism	metabolism	-2.50873	NA	1.05482	0.0175784
BB1543		Conserved hypothetical protein	hydrolase activity, acting on ester bonds	metabolism	-1.14352	0.3235	-1.13436	0.0820596
BB1544		putative exported protein		Periplasmic/ Exported/ Lipoprotein	-1.24274	0.2215	1.15195	0.174978
BB1545	bisC	Putative biotin sulfoxide reductase	oxidoreductase activity	electron transport	NA	NA	-1.00476	0.107668
BB1546		Conserved hypothetical protein	hydrolase activity, acting on carbon-nitrogen (but not peptide) bonds	nitrogen metabolism	NA	NA	NA	NA
BB1547		Putative amino acid ABC transport system,ATP-binding protein	ATP-binding cassette (ABC) transporter activity	transport	-3.31192	NA	-1.25159	0.00896289
BB1548		Putative amino acid ABC transport system,ATP-binding protein	ATP-binding cassette (ABC) transporter activity	transport	-1.79234	NA	-1.07474	0.115422
BB1549		Putative amino acid ABC transport system,membrane protein	transporter activity	transport	-1.6959	0.160877	1.22716	0.0705825
BB1550		Putative amino acid ABC transport system,membrane protein	transporter activity	transport	-2.36477	0.117321	1.26574	0.0842678
BB1551		Putative amino acid ABC transport system,substrate-binding protein		transport	NA	NA	NA	NA
BB1552		Putative exported protein		Periplasmic/ Exported/ Lipoprotein	NA	NA	NA	NA
BB1553		Hypothetical protein		Unknown proteins, no known homologs	-2.44647	0.041	-1.05971	0.0355
BB1554		Putative UDP-N-acetylglucosamine1-carboxyvinyltransferase	transferase activity		-1.61721	0.056063	1.51777	0.08
BB1555		Conserved hypothetical protein		Conserved in organism other than E. coli	-1.78028	0.074414	NA	NA
BB1556		ABC transporter, ATP-binding protein	ATP-binding cassette (ABC) transporter activity	transport	-2.10334	0.0772802	1.38579	0.066
BB1557	tpm	thiopurine S-methyltransferase	thiopurine S-methyltransferase activity		NA	NA	-1.4265	0.0705
BB1558	vir-18	vir-repressed protein			-1.19489	0.0455	1.39492	0.0555983
BB1559		putative exported protein		Periplasmic/ Exported/ Lipoprotein	-1.30797	0.0864237	-1.23705	0.053087
BB1560		putative lipoprotein		Periplasmic/ Exported/ Lipoprotein	-1.95319	NA	-1.058	NA
BB1561		conserved hypothetical protein		Conserved in organism other than E. coli	-2.32432	0.0715297	1.22893	0.0285	negative	-3.4259	0	12.4622
BB1562		putative phospholipase			-2.14906	0.119619	-1.00793	0.14528
BB1563		probable aldehyde dehydrogenase	oxidoreductase activity	metabolism	-2.29148	0.064834	-1.0765	0.018
BB1564		putative exported protein	catalytic activity, signal transduction	signal transduction	NA	NA	NA	NA
BB1565		conserved hypothetical protein		Conserved in organism other than E. coli	-3.74907	NA	NA	NA
BB1566		biotin carboxyl carrier protein	acetyl-CoA carboxylase activity	fatty acid biosynthesis	-1.7166	0.0792857	-1.09444	0.01
BB1567		probable carboxylase			-1.65924	0.116958	-1.0884	0.002
BB1568		conserved hypothetical protein		Conserved in organism other than E. coli	-1.73034	0.135568	1.01726	0.0300694
BB1569		conserved hypothetical protein	aminocarboxymuconate-semialdehyde decarboxylase activity	metabolism	NA	NA	-1.61079	0.0975214
BB1570		conserved hypothetical protein		Conserved in organism other than E. coli	1.02695	NA	NA	NA
BB1571		GntR-family transcriptional regulator	transcription factor activity	Global Regulatory Functions	-1.34282	0.0571343	-1.16949	0.0743913
BB1572	accC, fabG	biotin carboxylase	biotin carboxylase activity	metabolism	-1.30314	0.245	-1.25678	0.0315367
BB1573		putative acyl-CoA carboxylase	biotin carboxylase activity		-1.81416	0.034548	-1.00178	0.0734273
BB1574		Putative biotinylated protein			-1.28786	0.13239	-1.15973	0.0259829
BB1575		Putative acetyl-CoA synthetase			-1.64863	0.0315	-1.15205	NA
BB1576		Conserved hypothetical protein		Conserved in organism other than E. coli	-1.57688	0.0679293	-1.47824	0.0893501
BB1577		Putative solute-binding protein		transport	-1.64405	0.133027	1.00846	0.190489
BB1578		Putative membrane protein		Cell envelope	-2.45844	0.0941612	-1.1619	0.139215
BB1579		Putative membrane protein		Cell envelope	NA	NA	NA	NA
BB1580		Putative membrane protein	transporter activity	transport	-1.68935	0.10474	1.28832	0.150113
BB1581		Putative reductase	disulfide oxidoreductase activity	electron transport	-2.59618	0.0433138	1.07953	0.0280496
BB1582		Hypothetical protein		Unknown proteins, no known homologs	-2.20504	NA	-1.10799	NA
BB1583		Putative decarboxylase	lyase activity	aromatic compound metabolism	NA	NA	-1.20342	0.1285
BB1584		Putative LysR-family transcriptional regulator	transcription factor activity	regulation of transcription, DNA-dependent	1.00965	NA	1.52183	0.004
BB1585		putative membrane protein		Cell envelope	-2.2555	NA	1.17665	NA
BB1586	ndoA, pahA2	Putative ferredoxin	oxidoreductase activity	metabolism	NA	NA	NA	NA
BB1587		Putative oxygenase	catalytic activity	metabolism	NA	NA	NA	NA
BB1588		Putative cyclodeaminase			1.15584	NA	NA	NA
BB1589		Putative dioxygenase	oxidoreductase activity, acting on single donors with incorporation of molecular oxygen, incorporation of two atoms of oxygen		-3.15897	0.0385	NA	NA
BB1590		Putative dioxygenase (small subunit)	oxidoreductase activity, acting on single donors with incorporation of molecular oxygen, incorporation of two atoms of oxygen	electron transport	-1.79666	0.288721	NA	NA
BB1591		Putative oxygenase (large subunit)	iron ion binding	electron transport	NA	NA	NA	NA
BB1592		Putative ABC transport system, substrate-bindingprotein		transport	-2.67278	NA	-1.24212	0.024
BB1593		Putative ABC transport system, membrane protein	transporter activity	transport	NA	NA	NA	NA
BB1594		Putative ABC transport system, membrane protein	transporter activity	transport	NA	NA	NA	NA
BB1595		Putative ABC transport system, ATP-bidningprotein	ATP-binding cassette (ABC) transporter activity	transport	NA	NA	NA	NA
BB1596		Putative ABC transport system, ATP-bindingprotein	ATP-binding cassette (ABC) transporter activity	transport	NA	NA	NA	NA
BB1597		Putative oxidoreductase	oxidoreductase activity	metabolism	-1.53711	0.0913413	-2.02988	0.052881
BB1598		Putative glutamyltransferase	gamma-glutamyltransferase activity		-1.27102	0.115184	-1.33832	0.0117118
BB1599		putative exported protein		Periplasmic/ Exported/ Lipoprotein	-1.22353	0.185951	-1.71379	0.0314891
BB1600		Putative GntR-family transcriptional regulator	transcription factor activity	Global Regulatory Functions	-1.13642	0.0522166	-1.49242	0.0281455
BB1601		Putative membrane protein		Cell envelope	-1.92007	0.117071	-1.32973	0.0802728
BB1602		Conserved hypothetical protein		Conserved in organism other than E. coli	-2.96345	0.1325	NA	NA
BB1603		Putative exported protein		Periplasmic/ Exported/ Lipoprotein	-1.9156	0.0913796	-1.06891	0.034011
BB1604		Putative exported protein		Periplasmic/ Exported/ Lipoprotein	NA	NA	1.16447	0.23
BB1605		putative exported protein		Periplasmic/ Exported/ Lipoprotein	NA	NA	NA	NA
BB1606		Putative oxidoreductase	oxidoreductase activity	electron transport	NA	NA	NA	NA
BB1607		Putative LysR-family transcriptional regulator	transcription factor activity	Global Regulatory Functions	-1.33214	NA	-1.06142	NA
BB1608		hypothetical protein		Unknown proteins, no known homologs	-1.64297	NA	-1.21605	NA
BB1609	bscF	putative type III secretion protein		TTSS	1.27469	0.188742	-2.59894	0.029023
BB1610	bscE	hypothetical protein		Unknown proteins, no known homologs	2.03312	0.742445	-4.44695	0.0055	positive	5.06997	0	6.65785
BB1611	bscD	putative type III secretion protein		TTSS	1.15356	0.194477	-2.20358	0.05216
BB1612	bcrD	putative type III secretion pore protein		TTSS	NA	NA	NA	NA
BB1613		conserved hypothetical protein		Conserved in organism other than E. coli	NA	NA	-2.01226	0.0355
BB1614		conserved hypothetical protein		Conserved in organism other than E. coli	NA	NA	-1.46142	NA
BB1615		hypothetical protein		Unknown proteins, no known homologs	-1.24228	0.216	-1.17964	0.006
BB1616	bopN	putative outer protein N		TTSS	NA	NA	NA	NA
BB1617	bsp22	putative secreted protein		TTSS	NA	NA	-1.4812	NA
BB1618		hypothetical protein		Unknown proteins, no known homologs	1.00875	0.2785	-2.25573	0.0318608
BB1619	bcrH1	putative regulatory protein		Global Regulatory Functions	NA	NA	-2.12743	NA
BB1620	bopD	putative outer protein D		TTSS	1.52581	0.102256	-2.93155	0.0405853
BB1621	bopB	putative outer protein B		TTSS	1.24833	NA	-1.96902	0.0374686
BB1622	bcrH2	putative regulatory protein		Global Regulatory Functions	-1.03447	NA	-1.60816	0.0295
BB1623	bcr4	hypothetical protein		Unknown proteins, no known homologs	NA	NA	-2.16009	0.006
BB1624	bscI	putative type III secretion protein		TTSS	1.19881	0.0931257	-1.72959	0.0205
BB1625	bscJ	putative type III secretion protein		TTSS	-1.00772	NA	-1.39782	0.0257704
BB1626	bscK	conserved hypothetical protein		Conserved in organism other than E. coli	-1.30924	0.238124	-1.21906	0.0905189
BB1627	bscL	putative type III secretion protein		TTSS	-1.54883	0.032	-1.01914	0.0855
BB1628	bscN	putative ATP synthase in type III secretionsystem	ATP binding	TTSS	NA	NA	1.08173	0.0095
BB1629	bscO	putative type III secretion protein		TTSS	NA	NA	NA	NA
BB1630	bscP	hypothetical protein		Unknown proteins, no known homologs	NA	NA	-2.2907	NA
BB1631	bscQ	putative type III secretion protein		TTSS	NA	NA	-1.55118	NA
BB1632	bscR	putative type III secretion protein	type III protein (virulence-related) secretor activity	TTSS	NA	NA	NA	NA
BB1633	bscS	putative type III secretion protein		TTSS	NA	NA	NA	NA
BB1634	bscT	putative type III secretion protein		TTSS	NA	NA	NA	NA
BB1635	bscU	putative type III secretion protein		TTSS	-1.01812	NA	-1.35675	0.048
BB1636	bscW	hypothetical protein		Unknown proteins, no known homologs	-1.3742	0.0485	-1.0765	0.013
BB1637	bscC	putative type III secretion protein		protein secretion	-1.55458	0.027	1.08274	0.0115
BB1638	brpL	putative RNA polymerase sigma factor	transcription factor activity	Global Regulatory Functions	-1.05709	0.243544	-1.22133	0.0647077
BB1639		hypothetical protein		Unknown proteins, no known homologs	-1.13693	0.002	-1.00051	0.0525
BB1640		hypothetical protein	glutamate-cysteine ligase activity	glutathione biosynthesis	-1.47067	0.0445	-1.06659	0.0285
BB1641		putative exported protein		Periplasmic/ Exported/ Lipoprotein	NA	NA	NA	NA
BB1642		putative regulator	catalytic activity	Global Regulatory Functions	NA	NA	NA	NA
BB1643		putative inner membrane transport protein	transporter activity	transport	NA	NA	1.03147	0.12152
BB1644	alr, dadB	alanine racemase, catabolic	alanine racemase activity	metabolism	NA	NA	-1.77798	NA
BB1645		putative anti-sigma factor	ATP binding	Global Regulatory Functions	-1.56328	0.053	1.24086	0.0480163
BB1646		putative anti-sigma factor antagonist		Global Regulatory Functions	1.3547	0.204992	-1.8673	0.0975
BB1647		putative phospholipase	catalytic activity	metabolism	-2.88605	0.0736712	1.57005	0.0615	negative	-5.09951	0	6.93277
BB1648		putative acetyltransferase	N-acetyltransferase activity		-1.69791	0.179869	NA	NA
BB1649	bapA	autotransporter		transport	-2.89536	0.0174109	1.69949	0.122	negative	-5.20273	0	6.63497
BB1650		hypothetical protein		Unknown proteins, no known homologs	-2.04828	0.0200756	1.15178	0.0947563	negative	-4.31318	0	9.38598
BB1651		hypothetical protein		Unknown proteins, no known homologs	-1.67891	0.0656239	1.35228	0.065
BB1652		hypothetical protein		Unknown proteins, no known homologs	-1.58284	0.173235	-1.02099	0.154775
BB1653		putative membrane protein		Cell envelope	1.23222	NA	-1.41727	0.0416253
BB1654		conserved hypothetical protein		Conserved in organism other than E. coli	-1.61968	0.067645	-1.00793	0.0339003
BB1655		conserved hypothetical protein	metalloendopeptidase activity	proteolysis and peptidolysis	-2.1485	0.0470425	1.19188	0.023484	negative	-3.25161	0	13.086
BB1656	dapA	dihydrodipicolinate synthase			-1.61345	0.0348326	1.24873	0.0249299
BB1657		putative lipoprotein		Periplasmic/ Exported/ Lipoprotein	1.14828	0.243509	-1.22398	0.0118348
BB1658	fim3	serotype 3 fimbrial subunit precursor		cell adhesion	2.22606	0.599001	-2.27351	0.0747188	positive	7.05799	0	2.17857
BB1659		conserved hypothetical protein		Conserved in organism other than E. coli	-2.27695	0.065676	1.42741	0.059
BB1660	mutS	mismatch repair protein	damaged DNA binding	mismatch repair	-1.8065	0.0489467	-1.05067	0.145319
BB1661		integrase	DNA binding	DNA recombination	-1.7628	0.0336706	1.25279	0.036
BB1662		phage-related hypothetical protein		Laterally acquired elements	-1.54597	0.0978647	1.49746	0.021
BB1663		phage-related conserved hypothetical protein		Laterally acquired elements	NA	NA	NA	NA
BB1664		phage-related putative membrane protein		Laterally acquired elements	-1.81564	0.123654	-1.07153	0.117559
BB1665		phage-related putative exported protein		Laterally acquired elements	NA	NA	NA	NA
BB1666		phage-related hypothetical protein		Laterally acquired elements	NA	NA	NA	NA
BB1667		phage-related hypothetical protein		Laterally acquired elements	NA	NA	NA	NA
BB1668		modification methylase	DNA binding	DNA methylation	NA	NA	1.41421	NA
BB1669		putative methyltransferase	methyltransferase activity		-1.07425	0.681	1.41117	NA
BB1670		phage-related hypothetical protein		Laterally acquired elements	NA	NA	NA	NA
BB1671		phage-related hypothetical protein		Laterally acquired elements	NA	NA	NA	NA
BB1672		phage-related hypothetical protein		Laterally acquired elements	NA	NA	NA	NA
BB1673		phage-related hypothetical protein		Laterally acquired elements	-1.13003	0.131165	-1.48455	0.0105
BB1674		phage-related conserved hypothetical protein		Laterally acquired elements	-2.34546	0.1635	NA	NA
BB1675		phage-related hypothetical protein		Laterally acquired elements	NA	NA	NA	NA
BB1676		phage-related putative membrane protein		Laterally acquired elements	NA	NA	NA	NA
BB1677		phage-related hypothetical protein		Laterally acquired elements	NA	NA	1.0203	0.104
BB1678		putative phage repressor	DNA binding	proteolysis and peptidolysis	-1.11444	0.0847264	1.01701	0.0890668
BB1679		phage-related conserved hypothetical protein		Laterally acquired elements	NA	NA	NA	NA
BB1680		phage-related hypothetical protein		Laterally acquired elements	-4.14297	0.0405	-1.48288	0.032105
BB1681		phage-related hypothetical protein		Laterally acquired elements	-1.49228	0.291	-1.32215	0.151
BB1682		phage-related hypothetical protein		Laterally acquired elements	1.35395	NA	-1.08004	NA
BB1683		phage-related hypothetical protein		Laterally acquired elements	1.14152	NA	NA	NA
BB1684		phage-related hypothetical protein		Laterally acquired elements	-1.32687	NA	1.01726	NA
BB1685		phage-related hypothetical protein		Laterally acquired elements	-1.91743	0.181575	1.11624	0.0495
BB1686		phage-related conserved hypothetical protein		Laterally acquired elements	-1.56825	0.150566	-1.03821	0.0932545
BB1687		phage-related hypothetical protein		Laterally acquired elements	NA	NA	NA	NA
BB1688		phage-related conserved hypothetical protein		Laterally acquired elements	-1.04936	0.119766	-1.51772	0.0236397
BB1689		phage-related conserved hypothetical protein		Laterally acquired elements	1.08806	0.190779	-1.31421	0.0805941
BB1690		phage-related putative endonuclease	nucleic acid binding	Laterally acquired elements	NA	NA	NA	NA
BB1691		phage-related hypothetical protein		Laterally acquired elements	NA	NA	NA	NA
BB1692		terminase			-1.96925	NA	-2.03093	NA
BB1693		portal protein			NA	NA	NA	NA
BB1694		phage-related Clp protease	endopeptidase Clp activity	Folding and Ushering	NA	NA	NA	NA
BB1695		major head protein			-1.34605	0.0655172	-1.1807	0.0299538
BB1696		phage-related hypothetical protein		Laterally acquired elements	NA	NA	NA	NA
BB1697		phage-related conserved hypothetical protein		Laterally acquired elements	-2.97134	NA	-1.35302	0.102
BB1698		phage-related conserved hypothetical protein		Laterally acquired elements	NA	NA	NA	NA
BB1699		phage-related hypothetical protein		Laterally acquired elements	NA	NA	NA	NA
BB1700		phage-related hypothetical protein		Laterally acquired elements	1.10453	NA	NA	NA
BB1701		phage-related conserved hypothetical protein		Laterally acquired elements	NA	NA	-1.13436	0.144472
BB1702		phage-related conserved hypothetical protein		Laterally acquired elements	NA	NA	NA	NA
BB1703		phage-related hypothetical protein		Laterally acquired elements	NA	NA	NA	NA
BB1704		phage-related hypothetical protein		Laterally acquired elements	NA	NA	1.21015	NA
BB1705		phage-related putative exported protein		Laterally acquired elements	-4.6422	NA	NA	NA
BB1706		putative tail component of prophage		Laterally acquired elements	NA	NA	1.1269	NA
BB1707		phage-related hypothetical protein		Laterally acquired elements	NA	NA	NA	NA
BB1708		phage-related hypothetical protein		Laterally acquired elements	-1.21879	0.059	-1.54631	0.114953
BB1709		phage-related hypothetical protein		Laterally acquired elements	-1.2996	0.0185	-1.03739	0.0035
BB1710		phage-related hypothetical protein		Laterally acquired elements	-1.52557	0.0055	1.12183	0.054
BB1711		phage-related putative exported protein		Laterally acquired elements	NA	NA	NA	NA
BB1712		phage-related hypothetical protein		Laterally acquired elements	NA	NA	NA	NA
BB1713		phage-related putative membrane protein		Laterally acquired elements	NA	NA	NA	NA
BB1714		phage-related hypothetical protein		Laterally acquired elements	NA	NA	NA	NA
BB1715		phage-related putative exported protein		Laterally acquired elements	NA	NA	NA	NA
BB1716		phage-related hypothetical protein		Laterally acquired elements	1.13635	0.392385	-1.4132	0.048
BB1717		phage-related conserved hypothetical protein		Laterally acquired elements	-1.33135	0.0915545	-1.49092	0.0214035
BB1718		conserved hypothetical protein		Conserved in organism other than E. coli	-1.38866	0.0796602	-1.17262	0.0890477
BB1719		putative chromate reductase			-1.50366	0.0463607	-1.26892	0.0882472
BB1720		putative membrane protein		Cell envelope	1.42079	NA	NA	NA
BB1721		putative exported protein		Periplasmic/ Exported/ Lipoprotein	-3.05437	0.124672	2.17411	0.1845	negative	-4.22893	0	9.66648
BB1722		conserved hypothetical protein		Conserved in organism other than E. coli	NA	NA	1.59695	NA
BB1723		putative exported protein		Periplasmic/ Exported/ Lipoprotein	-1.66943	0.100857	1.07538	0.0590979
BB1724		putative exported protein		Periplasmic/ Exported/ Lipoprotein	NA	NA	NA	NA
BB1725		putative membrane protein		Cell envelope	NA	NA	1.07614	0.247049
BB1726		putative transcriptional regulator	DNA binding	regulation of transcription, DNA-dependent	-1.12096	NA	-1.10241	0.0115
BB1727		putative exported protein		Periplasmic/ Exported/ Lipoprotein	-1.75848	0.0204328	1.06904	0.0520561
BB1728		probable methyltransferase	RNA binding	RNA processing	-1.58772	0.0569656	-1.0692	0.0769593
BB1729	suhB, ssyA	inositol-1-monophosphatase, probable inositol monophosphatase	inositol/phosphatidylinositol phosphatase activity		-1.80748	0.0858271	1.19222	0.153912
BB1730		putative membrane protein		Cell envelope	-3.55426	0.0522709	1.77005	0.0495992	negative	-5.91682	0	4.74491
BB1731	bacA	bacitracin resistance protein	undecaprenol kinase activity	response to antibiotic	-1.98323	0.0297881	1.43858	0.110439
BB1732	lpxH	UDP-2,3-diacylglucosamine hydrolase	hydrolase activity, acting on acid anhydrides, in phosphorus-containing anhydrides	lipid A biosynthesis	1.13615	0.503359	-1.14735	0.0985533
BB1733	ppiB	peptidyl-prolyl cis-trans isomerase B	isomerase activity	protein folding	-1.06245	0.0386511	-1.01337	0.0383514
BB1734		putative exported protein		Periplasmic/ Exported/ Lipoprotein	-1.70078	0.0271596	-1.03712	0.11656
BB1735	cysS	cysteinyl-tRNA synthetase	cysteine-tRNA ligase activity	translation	-2.34218	0.0189257	1.29518	0.0950941	negative	-7.02737	0	2.43168
BB1736		DNA-3-methyladenine glycosylase, DNA binding	carbohydrate metabolism	metabolism	-1.54835	0.109753	1.34365	0.178019
BB1737	accA	acetyl-coenzyme A carboxylase carboxyltransferase subunit alpha	acetyl-CoA carboxylase activity	fatty acid biosynthesis	-1.5935	0.164932	1.14442	0.021654
BB1738		conserved hypothetical protein		Conserved in organism other than E. coli	NA	NA	1.64822	0.204357
BB1739	ask	aspartokinase	amino acid biosynthesis	metabolism	-1.51294	0.0861064	-1.28005	0.0115072
BB1740		conserved hypothetical protein		Conserved in organism other than E. coli	NA	NA	-2.12056	0.0235
BB1741		conserved hypothetical protein		Conserved in organism other than E. coli	-1.67249	NA	-1.31905	0.092732
BB1742		putative 3-hydroxyacyl-CoA dehydrogenase	oxidoreductase activity	fatty acid metabolism	NA	NA	NA	NA
BB1743		putative membrane protein		Cell envelope	-1.93887	0.0717183	1.10127	0.107259
BB1744		putative membrane protein		Cell envelope	NA	NA	1.4467	NA
BB1745		putative exported protein		transport	-2.10202	0.151762	1.04645	0.0163063
BB1746	bioH	putative hydrolase	hydrolase activity		-1.53652	0.421099	NA	NA
BB1747		putative exported protein		Periplasmic/ Exported/ Lipoprotein	-1.58621	0.185589	-1.21305	NA
BB1748		probable short chain dehydrogenase	oxidoreductase activity	metabolism	NA	NA	NA	NA
BB1749		probable TetR-family transcriptional regulator	transcription factor activity	Global Regulatory Functions	NA	NA	1.1269	0.177
BB1750		LysR-family transcriptional regulator	transcription factor activity	Global Regulatory Functions	-1.12623	NA	-1.1807	0.0490924
BB1751		putative extracellular solute-binding protein			NA	NA	NA	NA
BB1752		conserved hypothetical protein	N-acetylglucosamine-6-phosphate deacetylase activity	N-acetylglucosamine metabolism	NA	NA	NA	NA
BB1753		putative ABC transporter, permease protein	transporter activity	transport	NA	NA	NA	NA
BB1754		putative ABC transporter, permease protein	transporter activity	transport	NA	NA	-1.28422	NA
BB1755		probable ATP-binding component of ABCtransporter	ATP-binding cassette (ABC) transporter activity	transport	NA	NA	NA	NA
BB1756		probable NADH-dependent flavin oxidoreductase	oxidoreductase activity	metabolism	-2.34055	NA	NA	NA
BB1757		probable transcriptional regulator	DNA binding	regulation of transcription, DNA-dependent	-1.49528	0.131648	-1.07123	0.0095
BB1758		putative pimeloyl-CoA synthetase			-1.60777	0.192043	1.14365	0.0165
BB1759		putative exported protein		Periplasmic/ Exported/ Lipoprotein	-1.0647	NA	1.14822	0.042
BB1760		conserved hypothetical protein		Conserved in organism other than E. coli	-2.70296	NA	NA	NA
BB1761		conserved hypothetical protein	oxidoreductase activity	metabolism	NA	NA	NA	NA
BB1762		hypothetical protein		Unknown proteins, no known homologs	NA	NA	NA	NA
BB1763		hypothetical protein		Unknown proteins, no known homologs	-1.67583	0.065	-1.25358	0.0482983
BB1764		putative ArsR-family transcriptional regulator	transcription factor activity	Global Regulatory Functions	-1.00802	0.568786	-1.4751	0.166565
BB1765	nemA	N-ethylmaleimide reductase	oxidoreductase activity	electron transport	1.33545	0.731072	-1.65825	0.201274
BB1766	bpsD	putative membrane protein		Cell envelope	2.10522	0.161259	-1.13961	0.0313174	positive	4.27555	0	9.09114
BB1767	bpsC	putative glycosyl transferase component of heminstorage system	transferase activity		NA	NA	-1.03903	NA
BB1768	bpsB	putative hemin storage protein	hydrolase activity, acting on carbon-nitrogen (but not peptide) bonds	carbohydrate metabolism	-1.44137	0.376335	NA	NA
BB1769	bpsA	putative hemin storage protein			-1.52072	0.405848	-2.20605	0.0285
BB1770		putative membrane protein		Cell envelope	1.40396	0.20434	-1.86996	0.0699981
BB1771		MarR-family transcriptional regulator	transcription factor activity	regulation of transcription, DNA-dependent	-1.76729	0.0235102	1.15228	NA
BB1772		branched-chain amino acid-binding protein			-2.11506	0.0510892	-1.03141	0.038
BB1773		putative permease component of branched-chainamino acid transport system	transporter activity	transport	NA	NA	NA	NA
BB1774		putative ATP-binding component of branched-chainamino acid ABC transporter	ATP-binding cassette (ABC) transporter activity	transport	-1.17602	NA	1.01997	0.0338247
BB1775		putative ATP-binding component of ABCtransporter	ATP-binding cassette (ABC) transporter activity	transport	NA	NA	NA	NA
BB1776		putative cytochrome	alcohol dehydrogenase activity	electron transport	-1.89253	0.121864	-1.19684	0.0714411
BB1777		probable oxidoreductase	electron transporter activity	electron transport	-1.95205	0.0420355	1.16447	0.0849274
BB1778		putative monooxygenase	monooxygenase activity	aromatic compound metabolism	-1.07868	0.0779914	-1.28381	0.0340597
BB1779	maiA	maleate cis-trans isomerase		metabolism	-1.37948	0.0910419	-1.05011	0.103513
BB1780		probable alpha			-1.20766	0.118955	-1.34932	0.0370383
BB1781		conserved hypothetical protein		Conserved in organism other than E. coli	-1.29175	0.107537	1.02386	0.0465
BB1782		putative isochorismatase			-1.32042	0.0986804	-1.28758	0.0356113
BB1783		probable aldehyde dehydrogenase	oxidoreductase activity	electron transport	-2.01362	0.073209	-1.39915	NA
BB1784		putative flavocytochrome	oxidoreductase activity	electron transport	1.25589	0.220977	-1.31553	0.136149
BB1785	bfrI	putative ferrisiderophore receptor	receptor activity	transport	NA	NA	1.16142	NA
BB1786		putative transcriptional regulator	transcription factor activity	Global Regulatory Functions	-1.19022	NA	-1.48567	NA
BB1787		putative exported protein		Periplasmic/ Exported/ Lipoprotein	-2.0961	0.0595	1.07005	NA
BB1788		putative sulfatase	sulfuric ester hydrolase activity	metabolism	-1.83787	0.0490662	-1.79526	0.091683
BB1789	fadD, oldD	long-chain-fatty-acid--CoA ligase	long-chain-fatty-acid-CoA ligase activity	metabolism	-1.6163	0.105012	1.03096	0.0699744
BB1790		Conserved hypothetical protein		Conserved in organism other than E. coli	-1.61267	0.060023	-1.16949	0.0402231
BB1791		putative acetyl-CoA acyltransferase (thiolase)protein	acyltransferase activity		-1.59969	0.0471345	-1.52124	0.0113468
BB1792		Putative 3-hydroxyacyl-CoA dehydrogenaseoxidoreductase	oxidoreductase activity	metabolism	-1.46874	0.0423572	-1.15543	0.0639277
BB1793		Putative fatty acid transport system, membraneprotein			-1.10543	0.157697	-1.50152	0.0310054
BB1794		Putative enoyl-CoA hydratasee	enoyl-CoA hydratase activity	fatty acid metabolism	-1.72909	0.0849479	-1.27715	0.0875998
BB1795		Putative thiolase	acetyl-CoA C-acyltransferase activity		-1.29508	0.092751	-1.24578	0.0196412
BB1796		Putative acyl-CoA dehydrogenase	acyl-CoA dehydrogenase activity	electron transport	NA	NA	2.10863	NA
BB1797		Putative TetR-family regulatory protein	transcription factor activity	Global Regulatory Functions	-2.28627	0.13	1.45051	0.153398
BB1798		Putative luxR-family regulatory protein	transcription factor activity	Global Regulatory Functions	-2.12131	NA	-1.17053	0.0145
BB1799		putative LuxR-family transcriptional regulator	two-component response regulator activity	Global Regulatory Functions	NA	NA	NA	NA
BB1800	pgm	phosphoglucomutase, phosphomannomutase activity	carbohydrate metabolism	metabolism	-1.68708	0.102773	1.22563	0.0938619
BB1801	pgi	putative glucose-6-phosphate isomerase	glucose-6-phosphate isomerase activity	metabolism	NA	NA	NA	NA
BB1802	srpH	serine acetyltransferase	serine O-acetyltransferase activity		-1.73542	0.0334312	-1.0394	0.0499878
BB1803		putative membrane protein	transporter activity	transport	-1.9385	0.105068	1.0132	0.0411238
BB1804		putative Sir2-like regulatory protein	DNA binding	chromatin silencing	-1.97234	0.135957	-1.03793	0.018
BB1805		putative inositol monophosphatase	inositol/phosphatidylinositol phosphatase activity		-2.34055	0.0601792	1.10812	0.0597795	negative	-3.21288	0	13.2248
BB1806	gabD	succinate-semialdehyde dehydrogenase [NADP+]	succinate-semialdehyde dehydrogenase [NAD(P)+] activity	metabolism	-1.5377	0.0579243	1.0736	0.0508667
BB1807	goaG	4-aminobutyrate aminotransferase	4-aminobutyrate transaminase activity	metabolism	-1.7487	0.18737	1.18985	0.196342
BB1808		probable GntR-family transcriptional regulator	transcription factor activity	Global Regulatory Functions	-1.49095	0.0336477	-1.02205	0.0438717
BB1809		conserved hypothetical protein		Conserved in organism other than E. coli	NA	NA	1.15838	NA
BB1810		probable ATP-dependent DNA helicase	DNA binding	DNA repair	-2.56833	0.0465	1.21371	0.0994254
BB1811		putative magnesium transporter	metal ion transporter activity	transport	-2.18777	0.0694469	-1.01337	0.0428213
BB1812		putative nuclease	nucleic acid binding		-1.97972	0.0528354	-1.21605	0.0583152
BB1813		putative extracellular solute-binding protein	transporter activity	transport	-2.16469	0.0263242	1.17005	0.0382328	negative	-4.74079	0	8.0128
BB1814		putative oligopeptide transport system permeaseprotein	transporter activity	transport	-2.03501	0.0153205	1.07995	0.0853731	negative	-5.27678	0	6.42498
BB1815		putative oligopeptide transport integralmembrane protein	transporter activity	transport	-1.81564	0.0698307	1.14822	NA
BB1816		putative ABC transporter, ATP-binding protein	ATP-binding cassette (ABC) transporter activity	transport	-1.69619	0.0652048	1.16142	0.0576035
BB1817		probable MarR-family transcriptional regulator	transcription factor activity	Global Regulatory Functions	1.22417	0.3845	-1.30984	0.023
BB1818		putative membrane protein		Cell envelope	-1.54064	0.0999461	-1.27097	0.0401269
BB1819		putative exported protein		Periplasmic/ Exported/ Lipoprotein	-4.05771	NA	NA	NA
BB1820		putative membrane protein		Cell envelope	NA	NA	1.1736	0.295919
BB1821		putative membrane protein		Cell envelope	NA	NA	1.39222	0.128915
BB1822		putative membrane protein	cysteine-type peptidase activity	proteolysis and peptidolysis	NA	NA	NA	NA
BB1823		putative exported protein		Periplasmic/ Exported/ Lipoprotein	NA	NA	NA	NA
BB1824		putative exported protein		Periplasmic/ Exported/ Lipoprotein	NA	NA	NA	NA
BB1825		putative membrane protein	ice binding	homoiothermy	-1.26383	0.121425	-1.16087	0.137423
BB1826		putative type II secretion system protein		protein secretion	-1.96463	NA	-1.1643	NA
BB1827		conserved hypothetical protein	two-component response regulator activity	Global Regulatory Functions	NA	NA	NA	NA
BB1828		probable type II secretion system protein	ATP binding	transport	-1.69705	0.0334128	-1.19466	0.0215
BB1829		putative membrane protein		Cell Envelope	NA	NA	NA	NA
BB1830		putative membrane protein		protein secretion	-1.86618	NA	1.01066	0.0365
BB1831		putative lipoprotein		Periplasmic/ Exported/ Lipoprotein	NA	NA	-1.13545	0.0725
BB1832		putative exported protein		Periplasmic/ Exported/ Lipoprotein	NA	NA	1.05279	0.009
BB1833		putative exported protein		Periplasmic/ Exported/ Lipoprotein	NA	NA	NA	NA
BB1834		putative response regulator	nucleotide binding	Global Regulatory Functions	NA	NA	-1.09627	0.0355
BB1835		putative lipoprotein		Periplasmic/ Exported/ Lipoprotein	-1.80262	0.0180382	1.10152	0.0623458
BB1836		conserved hypothetical protein		Conserved in organism other than E. coli	-1.99901	0.0481087	1.00457	0.0865838
BB1837		putative ECF-family RNA polymerase sigma factor	transcription factor activity	Global Regulatory Functions	-2.28783	0.0727428	1.06015	0.0127238
BB1838		putative exported protein		Periplasmic/ Exported/ Lipoprotein	-2.0264	0.0663667	1.22234	0.043
BB1839		putative cytochrome c	electron transporter activity	electron transport	-1.94412	0.0477039	-1.02285	0.0824389
BB1840	efp	putative elongation factor P	translation elongation factor activity	translation	-2.0487	0.0259448	1.22538	0.119991	negative	-4.25168	0	9.59045
BB1841		conserved hypothetical protein		Conserved in organism other than E. coli	-1.8872	0.0165751	1.20102	0.0640469		-3.36498	0	12.68
BB1842		conserved hypothetical protein		Conserved in organism other than E. coli	-1.69219	0.0720165	1.01269	0.128821
BB1843		conserved hypothetical protein	oxidoreductase activity	electron transport	-1.48107	0.0915255	1.16041	0.02
BB1844	acnA	putative aconitate hydratase	RNA binding	metabolism	1.12621	0.1891	1.08147	0.0517758
BB1845		putative lipoprotein		Periplasmic/ Exported/ Lipoprotein	NA	NA	1.02809	0.160416
BB1846	brfB	putative ferric siderophore receptor	receptor activity	transport	NA	NA	NA	NA
BB1847		putative haloacid-type dehydrogenase	hydrolase activity, acting on acid halide bonds, in C-halide compounds	metabolism	-1.34282	0.0474148	-1.23382	0.0112891
BB1848		putative lipoprotein		Periplasmic/ Exported/ Lipoprotein	NA	NA	NA	NA
BB1849		hypothetical protein		Unknown proteins, no known homologs	-2.46205	0.248748	NA	NA
BB1850	acnB	putative aconitate hydratase	tricarboxylic acid cycle	metabolism	1.2333	0.349306	-1.64647	0.0898289
BB1851		putative exonuclease	exonuclease activity		-1.5436	0.0498415	-1.09232	0.0894719
BB1852		conserved hypothetical protein		Conserved in organism other than E. coli	-1.38996	0.0445733	-1.1152	0.100647
BB1853		conserved hypothetical protein		Conserved in organism other than E. coli	-2.31629	0.0275575	1.33959	0.0765	negative	-3.67916	0	11.5618
BB1854		conserved hypothetical protein		Conserved in organism other than E. coli	-2.12238	0.162826	1.53756	0.1745
BB1855		putative integral membrane protein			-2.32217	0.0720239	1.37563	0.046
BB1856		putative integral membrane protein		Cell envelope	-1.61604	0.041	1.29746	0.059
BB1857		putative exported protein		Periplasmic/ Exported/ Lipoprotein	NA	NA	NA	NA
BB1858		Putative exported protein		Periplasmic/ Exported/ Lipoprotein	-1.8078	0.043	-1.0872	0
BB1859		Putative membrane protein		Cell envelope	-1.84903	0.0483885	-1.03141	0.0438957
BB1860		putative LysR-family transcriptional activator	transcription factor activity	Global Regulatory Functions	-1.93514	0.0300638	-1.1619	0.0289349		-3.228	0	13.1706
BB1861		putative acyl-CoA transferase	acetyl-CoA metabolism	metabolism	-1.52932	0.308134	1.17124	0.0854524
BB1862		putative transmembrane transport protein	bile acid:sodium symporter activity	sodium ion transport	-2.03935	0.115949	1.3	0.0045
BB1863		putative LysR-family transcriptional regulator	transcription factor activity	Global Regulatory Functions	-1.54312	0.120376	-1.206	0.0628866
BB1864	vag8	autotransporter	pathogenesis	transport	-1.62269	0.294344	-1.10179	0.374
BB1865		Maf-like protein			-2.26158	0.061161	1.15076	0.0731967	negative	-3.25751	0	13.0649
BB1866		conserved hypothetical protein		Conserved in organism other than E. coli	-1.63949	0.0881357	1.09036	0.0380022
BB1867		conserved hypothetical protein		Conserved in organism other than E. coli	-1.76373	0.0781424	-1.03848	0.0731397
BB1868	nadD	putative nicotinate-nucleotideadenylyltransferase	nicotinate-nucleotide adenylyltransferase activity	biosynthesis	-2.21038	0.0498494	1.54036	0.194481	negative	-3.26645	0	13.0328
BB1869	hemF	coproporphyrinogen III oxidase	coproporphyrinogen oxidase activity	porphyrin biosynthesis	-2.00411	0.0717526	1.38426	0.0810735
BB1870	purD	phosphoribosylamine--glycine ligase	phosphoribosylamine-glycine ligase activity	purine base biosynthesis	-1.04089	0.101418	-1.36663	0.016864
BB1871		conserved hypothetical protein		Conserved in organism other than E. coli	-1.46767	0.0583675	-1.37426	0.0358919
BB1872		conserved ATP-binding protein	ATP binding	transport	-1.03023	0.113167	-1.17999	0.0155316
BB1873		putative aminotransferase	transaminase activity		-1.42624	0.0236192	-1.24723	0.0652385
BB1874		putative 2-hydroxyacid dehydrogenase	oxidoreductase activity, acting on the CH-OH group of donors, NAD or NADP as acceptor	L-serine biosynthesis	-1.27666	0.158829	-1.12668	0.030486
BB1875		putative aldehyde dehydrogenase	oxidoreductase activity	metabolism	-1.72269	0.130763	-1.17647	0.0877092
BB1876		putative membrane protein		Cell envelope	-1.87747	0.176329	1.04467	0.0846276
BB1877		putative amidohydrolase	metallopeptidase activity	proteolysis and peptidolysis	-1.65694	0.105241	1.01802	0.0435055
BB1878		putative acetylpolyamine aminohydrolase	hydrolase activity		NA	NA	1.30863	NA
BB1879		conserved hypothetical protein		Conserved in organism other than E. coli	-1.38327	0.0721809	-1.06257	NA
BB1880		aminobutyrate aminotransferase	4-aminobutyrate transaminase activity	aminobutyrate metabolism	NA	NA	NA	NA
BB1881		putative ABC transport ATP-binding subunit	ATP-binding cassette (ABC) transporter activity	transport	NA	NA	-1.22208	0.0871789
BB1882		putative integral membrane transport protein	transporter activity	transport	-3.20734	0.0565	1.40457	0.2185
BB1883		putative integral membrane transport protein	transporter activity	transport	-1.9445	0.105255	-1.02417	0.0281525
BB1884		putative solute-binding transport protein(periplasmic)	transporter activity	transport	-1.80553	0.101512	-1.15882	0.00980646
BB1885		putative transcriptional regulator	transcription factor activity	Global Regulatory Functions	-1.09329	0.0377116	-1.49017	0.0140475
BB1886		tartrate dehydrogenase	tartrate dehydrogenase activity	metabolism	-1.55002	0.0407483	-1.34624	0.0726873
BB1887		putative multidrug resistance protein	transporter activity	transport	-2.11195	0.198922	1.21574	0.0725655
BB1888		putative multidrug resistance protein	protein transporter activity	protein secretion	-1.62729	0.163452	-1.30205	0.105619
BB1889		putative outer membrane protein	transporter activity	transport	-2.97838	0.0642763	1.10558	0.0572087	negative	-4.1816	0	9.82537
BB1890		putative transcriptional regulator (MarRfamily)	transcription factor activity	Global Regulatory Functions	-2.31896	0.0684912	1.47005	0.083
BB1891		conserved hypothetical integral membraneprotein		Conserved in organism other than E. coli	-1.35239	0.0776614	-1.0872	0.00650641
BB1892		conserved hypothetical integral membraneprotein		Conserved in organism other than E. coli	-1.37026	0.189	1.36193	0.0345
BB1893	qor, hcz	quinone oxidoreductase	NADPH:quinone reductase activity		-1.15654	NA	-1.39469	0.0574113
BB1894		heat shock protease	heat shock protein activity	Folding and Ushering	-1.08066	0.206495	-1.01809	0.134235
BB1895		probable integral membrane protein			-2.16983	0.056412	1.29289	0.0897687
BB1896		putative sulfurtransferase	transferase activity		-1.38023	0.0446448	-1.3365	0.0797883
BB1897		conserved hypothetical protein	catalytic activity	Conserved in organism other than E. coli	-1.24523	0.0363365	-1.43796	0.00971253
BB1898		putative transcriptional regulator	transcription factor activity	Global Regulatory Functions	-2.64536	0.16697	-1.03793	0.039
BB1899		putative ABC transport ATP-binding subunit	ATP-binding cassette (ABC) transporter activity	transport	-2.4938	NA	-1.07768	NA
BB1900		putative ABC transport permease	transporter activity	transport	-2.41823	0.0289569	-1.27015	0.0075
BB1901		putative hydrolase	hydrolase activity	metabolism	-2.2593	0.0146536	-1.29776	0.022
BB1902		putative periplasmic protein	transporter activity	transport	-1.73482	0.0116762	NA	NA
BB1903		putative secreted oxidoreductase			-1.61799	0.0572019	1.00863	0.0135
BB1904		Putative sigma-70 factor, ECF subfamily	transcription factor activity	transcription initiation	NA	NA	-1.16293	NA
BB1905		putative extracellular heme-binding protein	receptor activity	transport	NA	NA	NA	NA
BB1906		putative iron-sulfur protein	oxidoreductase activity	electron transport	-1.52719	0.0822588	1.54695	0.017158
BB1907		putative integral membrane protein	transferase activity, transferring groups other than amino-acyl groups		NA	NA	1.7797	NA
BB1908		putative exported protein		Periplasmic/ Exported/ Lipoprotein	-1.8122	0.145338	-1.22133	0.144161
BB1909		putative transcriptional regulator	DNA binding	regulation of transcription, DNA-dependent	-1.49406	0.203437	-1.15814	0.171058
BB1910	xseB	exodeoxyribonuclease VII small subunit	exodeoxyribonuclease VII activity	DNA catabolism	-1.36081	0.0935755	-1.14735	0.0216545
BB1911		probable geranyltranstransferase	transferase activity	isoprenoid biosynthesis	-1.37064	0.0689298	-1.18603	0.0322607
BB1912	dxs	1-deoxy-D-xylulose 5-phosphate synthase	1-deoxy-D-xylulose-5-phosphate synthase activity	thiamin biosynthesis	-1.41016	0.117691	1.02868	0.0133502
BB1913		conserved hypothetical protein		Conserved in organism other than E. coli	-1.35348	0.0688817	1.12741	0.0131498
BB1914	rpsF	30s ribosomal protein s6	structural constituent of ribosome	translation	-3.06555	0.048323	1.52716	0.00423035	negative	-5.49129	0	5.83454
BB1915	priB	primosomal replication protein n	single-stranded DNA binding	DNA replication, synthesis of RNA primer	1.08225	0.494295	1.2198	0.0374578
BB1916	rpsR	30s ribosomal protein s18	structural constituent of ribosome	translation	-2.42874	0.105267	1.33376	0.211029
BB1917	rplI	50s ribosomal protein l9	structural constituent of ribosome	translation	-1.72826	0.0258723	1.02369	0.0111704
BB1918		hypothetical protein	protein kinase activity	protein amino acid phosphorylation	-2.36783	0.100639	1.4703	0.197295
BB1919	dnaB	DNA helicase	DNA binding	DNA replication	-1.71207	0.0761619	1.16954	0.0689408
BB1920		putative exported protein		Periplasmic/ Exported/ Lipoprotein	-1.59806	0.0642541	1.06954	0.0355
BB1921		conserved hypothetical protein		Conserved in organism other than E. coli	-1.94243	0.041748	-1.00357	0.0215
BB1922		hypothetical protein	ATP binding	cellular response to phosphate starvation	-1.47154	0.0260172	1.07563	0.0519687
BB1923		hypothetical protein		Unknown proteins, no known homologs	-1.50456	0.0174479	1.0467	0.0388652
BB1924		conserved hypothetical protein		Conserved in organism other than E. coli	-1.98519	0.0285125	1.11574	0.0803917		-3.15512	0	13.4317
BB1925		putative aminotransferase	aromatic amino acid family biosynthesis	biosynthesis	-1.62492	0.0618453	1.10964	0.0355387
BB1926		homoserine dehydrogenase	amino acid biosynthesis	metabolism	-1.45144	0.0446672	1.15914	0.0163012
BB1927	thrC	threonine synthase	threonine synthase activity	threonine biosynthesis	-1.81236	0.0186631	1.14061	0.0424372
BB1928		lipoprotein		Periplasmic/ Exported/ Lipoprotein	-1.73392	0.158001	1.08782	0.0005
BB1929	fbp, fdp	fructose-1,6-bisphosphatase	fructose-bisphosphatase activity	metabolism	1.1269	0.3815	-1.0896	0.0625633
BB1930	pepN	aminopeptidase N	membrane alanyl aminopeptidase activity	proteolysis and peptidolysis	-1.54123	0.0688339	1.05254	0.0360956
BB1931		putative exported protein		Periplasmic/ Exported/ Lipoprotein	-1.26574	0.0910604	-1.11048	0.201
BB1932	bph3	putative DNA-binding protein (histone)	DNA binding	Global Regulatory Functions	-2.01463	0.111804	-1.19033	0.0068374
BB1933		putative hydrolase	hydrolase activity, acting on carbon-nitrogen (but not peptide) bonds	nitrogen metabolism	-3.1057	0.0592314	2.0066	0.0325	negative	-5.69821	0	5.29079
BB1934		conserved hypothetical protein		Conserved in organism other than E. coli	-1.13654	0.0486352	-1.27302	0.0136527
BB1935	aroG	phospho-2-dehydro-3-deoxyheptonate aldolase,Phe-sensitive	aromatic amino acid family biosynthesis	metabolism	-1.86515	0.0450331	-1.03195	0.0285
BB1936	fhaL	adhesin	pathogenesis	Cell envelope	NA	NA	NA	NA
BB1937		putative oxidoreductase		electron transport	1.08742	0.088509	-1.38635	0.0145
BB1938	glcD	glycolate oxidase subunit		electron transport	-2.70187	0.221168	2.52183	0.286
BB1939	glcE	glycolate oxidase subunit		electron transport	-1.72588	0.033	-1.04732	0.0445
BB1940	glcF	glycolate oxidase iron-sulfur subunit	electron transporter activity	electron transport	-1.65514	0.0235	-1.02926	0.129
BB1941		putative exported protein	catalytic activity	Periplasmic/ Exported/ Lipoprotein	-1.46681	0.0375	-1.18722	0.0303443
BB1942	bfeA	ferric enterobactin receptor	receptor activity	transport	-1.73392	0.0075	-1.04013	0.006
BB1943		putative transcriptional regulator	transcription factor activity	Global Regulatory Functions	-2.24342	0.051	-1.0896	0.069
BB1944	pntB, nntB	NAD(P) transhydrogenase subunit beta	NAD(P)+ transhydrogenase (AB-specific) activity	electron transport	-2.80552	0.0833105	1.5203	0.200603	negative	-3.56438	0	11.9686
BB1945	pntAB, nntA2	NAD(P) transhydrogenase, subunit alpha part 2	NAD(P)+ transhydrogenase (AB-specific) activity		-2.22949	0.0614224	1.20305	0.072848
BB1946	pntaA, nntA1	NAD(P) transhydrogenase, subunit alpha part 1	NAD(P)+ transhydrogenase (AB-specific) activity	electron transport	-1.87	0.0857296	1.40254	0.151679
BB1947		putative hydrolase	hydrolase activity		1.17156	0.11194	-1.74956	0.0428272
BB1948		putative exported protein		Periplasmic/ Exported/ Lipoprotein	-1.36673	0.104024	-1.16499	0.0490077
BB1949		putative LysR-family transcriptional regulator	transcription factor activity	Global Regulatory Functions	-1.09903	0.206935	-1.19781	0.1304
BB1950	trmU	tRNA(5-methylaminomethyl-2-thiouridylate)-methyltransferase	tRNA(5-methylaminomethyl-2-thiouridylate)-methyltransferase activity	translation	-1.46404	0.0700622	-1.14602	0.123312
BB1951		putative integral membrane protein			-1.55062	0.137837	1.23299	0.0395
BB1952		conserved hypothetical protein		Conserved in organism other than E. coli	-1.9167	0.0473474	1.27462	0.211643
BB1953	purB	adenylosuccinate lyase	adenylosuccinate lyase activity	purine ribonucleotide biosynthesis	-1.2643	0.128149	1.04543	0.120669
BB1954		putative c'cytochrome	electron transporter activity	electron transport	-1.17041	0.108259	-1.35488	0.0223383
BB1955		putative integral membrane protein	oxidoreductase activity	electron transport	-4.06591	0.0158691	2.19442	0.0299625	negative	-14.3498	0	0
BB1956		hypothetical protein		Unknown proteins, no known homologs	-3.74767	0.060486	2.29873	0.20698	negative	-4.907	0	7.50386
BB1957		putative lipoprotein		Periplasmic/ Exported/ Lipoprotein	-1.60444	0.4545	1.35228	0.054
BB1958		putative exported protein		Periplasmic/ Exported/ Lipoprotein	-2.00699	0.0501129	1.13071	0.0229215
BB1959		conserved hypothetical protein		Conserved in organism other than E. coli	-1.06099	0.189641	-1.59128	0.01
BB1960		conserved hypothetical protein		Conserved in organism other than E. coli	-2.00219	0.0716138	1.11345	0.0107034
BB1961		hypothetical protein	catalytic activity		-1.9385	0.0906207	-1.09933	0.0657356
BB1962		Hypothetical protein		Unknown proteins, no known homologs	-1.87384	0.0762398	-1.07328	0.0273994
BB1963		hypothetical protein		Unknown proteins, no known homologs	1.44127	0.472171	-1.65918	0.0355543
BB1964		hypothetical protein		Unknown proteins, no known homologs	-1.06877	0.12426	1.06244	0.0265
BB1965		hypothetical protein		Unknown proteins, no known homologs	-1.68765	0.0954376	1.01117	0.028589
BB1966		conserved hypothetical protein		Conserved in organism other than E. coli	-1.49628	0.035	-1.11594	0.101837
BB1967		conserved hypothetical protein		Conserved in organism other than E. coli	1.00159	0.234274	-1.42444	0.111476
BB1968		putative membrane protein		Cell envelope	-2.33892	0.137685	1.04129	0.0518984
BB1969		putative phospholipase D family protein	catalytic activity	metabolism	-1.83552	0.00655744	-1.07415	0
BB1970		putative membrane protein	glutamate synthase activity	glutamate biosynthesis	-1.3777	0.168591	1.0247	0.0803354
BB1971		putative membrane protein		Cell envelope	-1.45324	0.347055	-1.07357	0.0127704
BB1972		putative membrane protein		Cell envelope	-1.77556	0.0305891	1.06878	0.0758237
BB1973		putative acetyltransferase	N-acetyltransferase activity		-1.72766	0.0622053	-1.11805	0.003
BB1974		conserved hypothetical protein		Conserved in organism other than E. coli	-2.0685	0.100236	-1.13024	0.011694
BB1975	rnr, vacB	putative ribonuclease R	RNA binding	RNA metabolism	-1.61371	0.0858172	-1.01337	0.100135
BB1976		putative tRNA	RNA binding	translation	-1.00169	0.351774	1.20305	0.091
BB1977		Cys	amino acid metabolism	metabolism	-1.65107	NA	1.02386	0.0743085
BB1978		conserved hypothetical protein	oxidoreductase activity, acting on single donors with incorporation of molecular oxygen, incorporation of two atoms of oxygen	Conserved in organism other than E. coli	-1.92183	NA	-1.40413	0.0485
BB1979	hupB, hopd	DNA-binding protein Hu-beta	DNA binding		-2.63496	0.0252982	1.02005	0.0335221	negative	-6.2108	0	4.05828
BB1980	tonB	siderophore-mediated iron transport protein	iron ion transporter activity	iron ion transport	-1.77996	0.0649003	1.22792	0.0201391
BB1981	exbB	MotA	protein transporter activity	transport	-2.78609	0.0595	1.50558	0.04
BB1982	exbD	biopolymer transport protein ExbD	transporter activity	transport	-2.53338	0.0701908	1.12081	0.021	negative	-4.95865	0	7.34868
BB1983	basR	response regulator protein	two-component response regulator activity	Global Regulatory Functions	-1.62544	0.0313124	-1.0875	0.0187855
BB1984		sensor kinase protein	two-component sensor molecule activity	signal transduction	-1.18713	0.0960343	-1.14038	0.0527358
BB1985	kup, trkD	putative potassium uptake protein	potassium ion transporter activity	potassium ion transport	-1.49406	0.117812	-1.24016	0.0720618
BB1986	argG	argininosuccinate synthase	arginine biosynthesis	metabolism	-1.20679	0.0664127	-1.55793	0.0965802
BB1987	argF	ornithine carbamoyltransferase	amino acid metabolism	metabolism	-1.51226	0.0770045	-1.06688	0.0841391
BB1988	argD	putative acetylornithine aminotransferase	arginine biosynthesis	metabolism	-1.72293	0.0581914	1.16421	0.0980828
BB1989		conserved hypothetical protein		Conserved in organism other than E. coli	-2.00299	0.123053	1.20888	0.0756763
BB1990		LysR family regulatory protein	transcription factor activity	Global Regulatory Functions	-1.58621	0.0589869	-1.09262	0.0133573
BB1991		putative short chain dehydrogenase	oxidoreductase activity	metabolism	-1.55386	0.0265	1.05228	0.0285
BB1992		putative D-isomer specific 2-hydroxyaciddehydrogenase	oxidoreductase activity, acting on the CH-OH group of donors, NAD or NADP as acceptor	L-serine biosynthesis	-1.43209	0.102529	-1.39321	0.132385
BB1993		putative lipoprotein		Periplasmic/ Exported/ Lipoprotein	-1.82156	0.023	1.00051	0.0145
BB1994		hypothetical protein		Unknown proteins, no known homologs	-1.96004	0.047	-1.05067	0.0005
BB1995		conserved hypothetical protein		Conserved in organism other than E. coli	-1.99781	0.107096	-1.04899	0.0350048
BB1996		GntR family regulatory protein	transcription factor activity	Global Regulatory Functions	-2.33159	0.0989203	-1.06775	0.0165	negative	-3.46314	0	12.3292
BB1997		putative malate dehydrogenase	L-malate dehydrogenase activity	metabolism	-1.93604	0.0488268	-1.05971	0.0105
BB1998		putative dihydroxy-acid dehydratase	dihydroxy-acid dehydratase activity	metabolism	-2.03296	0.0897577	1.03249	0.014	negative	-3.22973	0	13.1644
BB1999		putative exported protein		Periplasmic/ Exported/ Lipoprotein	NA	NA	NA	NA
BB2000		putative aldolase	aldolase activity	metabolism	NA	NA	NA	NA
BB2001	rpst	30s ribosomal protein s20	RNA binding	translation	-2.25146	0.137776	1.28706	0.0494155
BB2002		putative membrane protein		Cell envelope	1.0635	0.22766	-1.39518	0.0447921
[truncated: 2,979 more rows]
