# Supplementary material for: Identification of a CO2 Responsive Regulon in Bordetella
Source: PLoS One. 2012 Oct 24;7(10):e47635. doi: 10.1371/journal.pone.0047635 (PMC3480411; doi:10.1371/journal.pone.0047635)
Supplement: Table S2 — B. bronchiseptica strain 761 Expression Arrays 1 & 2. (XLSX) [file pone.0047635.s003.xlsx]

## Sheet: Sheet1
Table S2. B. bronchiseptica strain 761 Expression Arrays 1 & 2.					5%CO2vO2		O2v5%CO2 (dye swap)
					5%CO2-Cy3 green (positive)		O2-Cy3 green (negative)
					O2-Cy3 red (negative)		5%CO2-Cy3 red (positive)
ORF	Name	Product	Function	General Category	Fold-Change	STEM	Fold-Change	STEM	SAM	Score(d)	q-value(%)	localfdr(%)
16S_RNA					NA	NA	NA	NA
23S_RNA					NA	NA	NA	NA
BB0001	gidA	glucose inhibited division protein A			1.02947	0.205134	-1.24487	0.0275772
BB0002	gidB	glucose inhibited division protein B		cell cycle	1.01548	0.158542	-1.12948	0.0997021
BB0003	parA, soj	ParA family protein			-1.07801	0.196711	-1.29819	0.0205061
BB0004		Putative acetyltransferase, GnaT family	N-acetyltransferase activity		1.28256	0.046634	-1.10467	0.0424264
BB0005	parB	probable chromosome partitioning protein ParB	DNA binding	plasmid partitioning (sensu Bacteria)	1.14303	0.107868	1.02369	0.059397
BB0006	ansB	L-asparaginase II precursor	asparaginase activity	asparagine metabolism	1.30585	0.11851	-1.15486	0.0742462
BB0008	secE, prlG	preprotein translocase SecE subunit	protein translocase activity	protein targeting	1.13306	0.155545	-1.08341	0.00565685
BB0009	nusG	transcription antitermination protein NusG	transcriptional elongation regulator activity	regulation of transcription, DNA-dependent	1.28992	0.0567549	-1.0889	0.0318198
BB0010	rplK, relC	50S ribosomal protein L11	structural constituent of ribosome	translation	1.47715	0.133712	-1.17262	0.0947523
BB0011	rplA	50S ribosomal protein L1	RNA binding	translation	1.2545	0.0388179	1.09179	0.0813173
BB0012	rplJ	50S ribosomal protein L10	structural constituent of ribosome	translation	1.50573	0.102456	1.19078	0.0841457
BB0013	rplL	50S ribosomal protein L7	structural constituent of ribosome	translation	1.34425	0.059708	1.4302	0.000707107
BB0014	rpoB, groN, nitB, rif, ron, stl, stv, tabD	DNA-directed RNA polymerase beta chain	transcription, DNA-dependent	Global Regulatory Functions	1.00068	0.169095	-1.09698	0.026163
BB0015	rpoC, tabB	DNA-directed RNA polymerase beta' chain	transcription, DNA-dependent	Global Regulatory Functions	1.14499	0.186787	-1.01112	0.00848528
BB0016		putative lipoprotein		Periplasmic/ Exported/ Lipoprotein	NA	NA	NA	NA
BB0017		putative membrane protein	protein kinase activity	protein amino acid phosphorylation	-1.01404	0.0851304	-1.01765	0.0813173
BB0018		probable two-component sensor protein	two-component sensor molecule activity	Global Regulatory Functions	-1.42957	0.178138	-2.18081	NA
BB0019		putative peptidoglycan binding protein		cell wall catabolism	-1.04009	0.123861	1.03384	0.079196
BB0020		probable two-component response regulator	two-component response regulator activity	Global Regulatory Functions	-1.41691	0.138993	-1.15882	NA
BB0021		Two-component response regulator	two-component response regulator activity	Global Regulatory Functions	1.04777	0.102819	1.53215	0.135765
BB0022		putative metal transporter	cation transporter activity	transport	1.31746	0.0612964	1.16244	0.0452548
BB0023		conserved hypothetical protein		Conserved in organism other than E. coli	1.2871	0.0534002	1.0846	0.100409
BB0024	rpsL	30S ribosomal protein S12	structural constituent of ribosome	translation	1.51511	0.0787742	1.24704	0.0311127
BB0025	rpsG	30S ribosomal protein S7	structural constituent of ribosome	translation	1.78077	0.0683342	1.34729	0.120915
BB0026	fusA, fus, far1	elongation factor G	translation elongation factor activity	translation	1.23515	0.0678903	1.02876	0.131522
BB0027	tuf, tufA, tufB	elongation factor Tu			1.22712	0.0749402	1.13367	0.267286
BB0028	rpsJ, nusE	30S ribosomal protein S10	tRNA binding	translation	1.16639	0.0373768	1.08333	0.0615183
BB0029	rplC	50S ribosomal protein L3	structural constituent of ribosome	translation	1.24647	0.0339415	1.24027	0.0381838
BB0030	rplD	50S ribosomal protein L4	structural constituent of ribosome	translation	1.17919	0.0290434	1.12056	0.0176777
BB0031	rplW	50S ribosomal protein L23	RNA binding	translation	1.17294	0.0622397	1.2758	0.0240416
BB0032	rplB	50S ribosomal protein L2	structural constituent of ribosome	translation	1.29052	0.0273452	1.24027	0.0820244
BB0033	rpsS	30S ribosomal protein S19	structural constituent of ribosome	translation	1.40527	0.0324352	1.21235	0.0905097
BB0034	rplV	50S ribosomal protein L22	structural constituent of ribosome	translation	1.44605	0.0537759	1.30372	0.0155563
BB0035	rpsC	30S ribosomal protein S3	nucleic acid binding	translation	1.49263	0.0875019	1.5368	0.0106066
BB0036	rplP	50S ribosomal protein L16	structural constituent of ribosome	translation	1.32788	0.0222456	1.1379	0.0254558
BB0037	rpmC	50S ribosomal protein L29	structural constituent of ribosome	translation	1.62375	0.0698043	1.50677	0.108894
BB0038	rpsQ	30S ribosomal protein S17	structural constituent of ribosome	translation	1.15568	0.0303089	-1.03548	0.0247487
BB0039		putative hydrolase	hydrolase activity		1.15047	0.0312513	1.03553	0.0268701
BB0040		putative aldehyde dehydrogenase	oxidoreductase activity	metabolism	-1.21413	0.0246572	-1.35318	0.0827315
BB0041	rplN	50S ribosomal protein L14	structural constituent of ribosome	translation	1.10374	0.0440651	1.22462	0.0233345
BB0042	rplX	50S ribosomal protein L24	structural constituent of ribosome	translation	1.29231	0.060638	1.28384	0.0233345
BB0043	rplE	50S ribosomal protein L5	structural constituent of ribosome	translation	1.25807	0.0529474	1.37183	0.0799031
BB0044	rpsN	30S ribosomal protein S14	structural constituent of ribosome	translation	1.30421	0.0382437	1.40228	0.10253
BB0045	rpsH	30S ribosomal protein S8	structural constituent of ribosome	translation	1.32564	0.0384255	1.31641	0.0325269
BB0046	rplF	50S ribosomal protein L6	structural constituent of ribosome	translation	1.35794	0.105937	1.14255	0.0403051
BB0047	rplR	50S ribosomal protein L18	structural constituent of ribosome	translation	1.38473	0.035945	1.7445	0.00141421
BB0048	rpsE	30S ribosomal protein S5	structural constituent of ribosome	translation	1.42744	0.0463391	1.43486	0.0480833
BB0049	rpmD	50S ribosomal protein L30	structural constituent of ribosome	translation	1.3191	0.047144	1.50423	0.0848528
BB0050	rplO	50S ribosomal protein L15	structural constituent of ribosome	translation	1.19988	0.0604592	1.12733	0.147785
BB0051	secY, prlA	preprotein translocase SecY subunit	protein translocase activity	protein secretion	1.25733	0.0360916	-1.00681	0.00424264
BB0052	infA	translation initiation factor IF-1	RNA binding	translation	1.128	0.0678019	-1.10364	0.0367696
BB0053	rpmJ	50S ribosomal protein l36	structural constituent of ribosome	translation	1.25912	0.109796	1.02919	0.0106066
BB0054	rpsM	30S ribosomal protein S13	RNA binding	translation	1.18396	0.0435457	1.16455	0.111016
BB0055	rpsK	30S ribosomal protein S11	structural constituent of ribosome	translation	1.23456	0.0656266	1.14763	0.108187
BB0056	rpsD, ramA	30S ribosomal protein S4	structural constituent of ribosome	translation	1.2807	0.04788	1.37225	0.0537401
BB0057	rpoA	DNA-directed RNA polymerase alpha chain	transcription, DNA-dependent	Global Regulatory Functions	1.14615	0.0407511	-1.12304	0.123744
BB0058		50S ribosomal protein L17	structural constituent of ribosome	translation	1.41762	0.101098	1.32995	0.0127279
BB0059		histidine triad protein			-1.45907	0.051397	-1.95372	0.00282843
BB0060	cutA, cycY, cutA1	putative periplasmic divalent cation toleranceprotein		Periplasmic/ Exported/ Lipoprotein	-1.01434	0.050002	-1.61918	0.123037
BB0061		thiol:disulfide interchange protein	electron transporter activity	electron transport	-1.09128	0.144741	-2.30409	NA
BB0062		putative membrane protein		Cell envelope	-1.15925	0.0412904	-2.9403	NA
BB0063	hemB	putative delta-aminolevulinic acid dehydratase	porphobilinogen synthase activity	heme biosynthesis	-1.30975	0.0196791	-1.3032	0.0622254
BB0064		putative GTP-binding protein			-1.34947	0.0205157	-1.32215	0.0820244
BB0065		putative cytochrome C precursor	electron transporter activity	electron transport	-1.13593	0.0501128	1.22843	0.0155563
BB0066		putative membrane protein		Cell envelope	-1.14172	0.0395966	-1.54107	0.066468
BB0067		putative cytochrome c asssembly protein		cytochrome c oxidase biogenesis	-1.07229	0.0466166	1.39425	0.00282843
BB0068	lysA	diaminopimelate decarboxylase	diaminopimelate decarboxylase activity	lysine biosynthesis via diaminopimelate	1.05313	0.0155642	-1.56972	0.0707107
BB0069	cyaY	conserved hypothetical protein		Conserved in organism other than E. coli	1.08141	0.0561617	-1.11142	0.0360624
BB0070		penicillin-binding protein 1A	penicillin binding	peptidoglycan biosynthesis	-1.11593	0.0440831	-1.77211	0.199404
BB0071	aroK	shikimate kinase I	amino acid biosynthesis	metabolism	1.02768	0.0502264	-1.14479	0.0120208
BB0072	aroB	3-dehydroquinate synthase	aromatic amino acid family biosynthesis, shikimate pathway	metabolism	1.26447	0.0706871	1.2555	0.00848528
BB0073		putative phosphohydrolase	magnesium ion binding	GTP metabolism	1.18247	0.0623792	1.1434	0.033234
BB0074		putative glutathione S-transferase	transferase activity		1.2871	0.0799919	1.16371	0.0940452
BB0075	uvrA	excinuclease ABC subunit A	ATP-binding cassette (ABC) transporter activity	nucleotide-excision repair	-1.06212	0.0532602	-1.14535	0.0933381
BB0076		putative transport protein	transporter activity	transport	-1.33208	0.0378159	-1.18259	0.0558614
BB0077	ssb	single-strand binding protein	single-stranded DNA binding	DNA replication	1.03512	0.0706227	-1.40798	0.026163
BB0078	bfrC	ferric siderophore receptor	receptor activity	transport	-1.42775	0.0731845	-2.12208	0.137179
BB0079		conserved hypothetical protein		Conserved in organism other than E. coli	1.30109	0.0804637	1.17217	0.156271
BB0080		putative aldolase	aldolase activity	metabolism	1.30674	0.101319	1.24619	0.066468
BB0081		putative exported protein		Periplasmic/ Exported/ Lipoprotein	1.17696	0.0705171	1.01058	0.053033
BB0082		GntR family regulatory proteins	transcription factor activity	Global Regulatory Functions	1.15359	0.0844655	1.011	0.0424264
BB0083		transcriptional regulator	transcription factor activity	Global Regulatory Functions	1.02902	0.066273	-2.08466	0.0749533
BB0084		putative chlorohydrolase	hydrolase activity		-1.31067	0.133385	-2.83453	0.0212132
BB0085		putative exported protein		Periplasmic/ Exported/ Lipoprotein	1.05105	0.048527	-1.07896	0.0968736
BB0086		putative glycosyl transferases	transferase activity	biosynthesis	-1.44308	0.0382143	-2.11071	NA
BB0087		hypothetical protein		Unknown proteins, no known homologs	-1.2333	0.0355256	-1.12894	0.114551
BB0088		LysR family regulatory protein	transcription factor activity	Global Regulatory Functions	-1.43385	0.0441362	NA	NA
BB0089		periplasmic solute-binding protein		transport	-1.03529	0.0257121	-1.08192	0.00212132
BB0090		ABC transport system permease protein	transporter activity	transport	1.04286	0.0482144	1.23393	0.235467
BB0091		ABC transporter ATP-binding protein	ATP-binding cassette (ABC) transporter activity	transport	-1.20737	0.132352	NA	NA
BB0092		conserved hypothetical protein		Conserved in organism other than E. coli	-1.05844	0.0679551	-1.85557	NA
BB0093		putative exported protein		Periplasmic/ Exported/ Lipoprotein	NA	NA	NA	NA
BB0094		TetR-family transcriptional regulator	transcription factor activity	Global Regulatory Functions	-1.16334	0.0482137	-1.85121	0.000707107
BB0095	glcB, glc	malate synthase G	glyoxylate cycle	metabolism	1.07501	0.0934717	1.10914	0.192333
BB0096	glcC	GntR-family transcriptional regulator	transcription factor activity	regulation of transcription, DNA-dependent	1.09481	0.132691	1.3511	0.151321
BB0097		putative dehydrogenase		metabolism	1.46212	0.190124	1.47843	0.120915
BB0098		Putative exported protein		Periplasmic/ Exported/ Lipoprotein	1.04748	0.139845	-1.46559	0.0445477
BB0099		UbiA prenyltransferase family protein	prenyltransferase activity	biosynthesis	1.11088	0.0277308	-1.43971	0.0254558
BB0100		putative aminotransferase	alanine-glyoxylate transaminase activity	biosynthesis	-1.4532	0.127005	1.24873	0.0438406
BB0101		conserved hypothetical protein		Conserved in organism other than E. coli	1.05685	0.199069	1.07318	0.0205061
BB0102		putative dihydrodipicolinate synthase			1.04462	0.190116	-1.35473	0.163342
BB0103		putative desaturase	catalytic activity	metabolism	1.18738	0.0664624	1.0055	0.0586899
BB0105		putative fatty acid desaturase	oxidoreductase activity		-1.2438	0.186009	NA	NA
BB0106		conserved hypothetical protein		Conserved in organism other than E. coli	1.31106	0.117693	-1.05067	0.120208
BB0107		conserved hypothetical protein		Conserved in organism other than E. coli	1.2705	0.235636	NA	NA
BB0108		probable amino acid permease	amino acid-polyamine transporter activity	transport	-1.16791	0.107714	-3.21196	NA
BB0109		Putative methyltransferase	S-adenosylmethionine-dependent methyltransferase activity		1.07784	0.0899416	-1.43971	0.175362
BB0110		putative adhesin		cell adhesion	3.10269	0.260937	-1.45656	0.0120208	positive	4.70036	0	0.0672459
BB0111		putative dehydrogenase	oxidoreductase activity, acting on CH-OH group of donors	metabolism	1.19643	0.24446	-2.12973	0.114551
BB0112		putative membrane protein		Cell envelope	1.33591	0.254737	-1.73568	NA
BB0113		conserved hypothetical protein		Conserved in organism other than E. coli	-1.13746	0.117263	1.02665	0.103945
BB0114		putative membrane protein		Cell envelope	-1.12058	0.0709327	-1.0726	0.311127
BB0115	aspS, tls	aspartyl-tRNA synthetase	magnesium ion binding	translation	-1.15785	0.0910097	1.11971	0.103945
BB0116		putative endonuclease	endonuclease activity		1.0058	0.113568	-1.21045	0.0516188
BB0117		putative phospholipase	catalytic activity	metabolism	1.12785	0.15491	NA	NA
BB0118		putative membrane protein		Cell envelope	1.43697	0.0773569	1.21489	0.0169706
BB0119		putative membrane protein	transporter activity	transport	-1.13363	0.0339945	-1.14369	0.0954594
BB0120		putative membrane protein		Cell envelope	1.02188	0.0267179	-1.67898	NA
BB0121		NAD dependent epimerase	catalytic activity	nucleotide-sugar metabolism	1.27608	0.116529	-1.18794	NA
BB0122		DegT	transaminase activity		1.64608	0.194489	1.60702	0.16617
BB0123		putative asparagine synthetase	asparagine synthase (glutamine-hydrolyzing) activity	metabolism	1.08588	0.0601041	-1.42667	0.177484
BB0124		putative UDP-glucose 4-epimerase			1.07248	0.0755341	1.08037	0.00989949
BB0125		putative phosphoesterase	hydrolase activity		1.05045	0.10312	-1.39223	0.0565685
BB0126		conserved hypothetical protein		Conserved in organism other than E. coli	-1.17527	0.0484551	-1.20183	0.0417193
BB0127		putative C-methyltransferase	S-adenosylmethionine-dependent methyltransferase activity		-1.1671	0.0570279	1.04695	0.0516188
BB0128	wbmS	hypothetical protein		Unknown proteins, no known homologs	-1.26678	0.085206	-1.53606	0.109602
BB0129	wbmR	putative formyl transferase	hydroxymethyl-, formyl- and related transferase activity	biosynthesis	-1.02549	0.0768906	-1.10726	0.00494975
BB0130	wbmO	hypothetical protein		Unknown proteins, no known homologs	1.01444	0.231345	-2.38788	NA
BB0131	wbmN	ABC transporter ATP-binding protein	ATP-binding cassette (ABC) transporter activity	transport	-1.14855	0.0586521	-1.53606	0.0473762
BB0132	wbmM	ABC transporter ATP-binding protein	ATP-binding cassette (ABC) transporter activity	transport	1.00521	0.0905431	-1.65778	0.0381838
BB0133	wbmL	ABC transporter integral membrane protein	ATP-binding cassette (ABC) transporter activity	transport	-1.05264	0.0707961	-1.45387	NA
BB0134	wbmK	hypothetical protein		Unknown proteins, no known homologs	1.21679	0.117747	-1.16972	0.269408
BB0135	wbmJ	hypothetical protein		Unknown proteins, no known homologs	-1.19513	0.0417792	-1.65315	0.0141421
BB0136	wbmI	putative asparagine synthetase	asparagine synthase (glutamine-hydrolyzing) activity	asparagine biosynthesis	-1.29911	0.0567227	-1.12948	0.013435
BB0137	wbmH	nucleotide sugar epimerase	catalytic activity	nucleotide-sugar metabolism	-1.51091	0.0251799	1.11506	0.176777
BB0138	wbmG	nucleotide sugar epimerase	catalytic activity	nucleotide-sugar metabolism	-1.32655	0.0205417	1.28088	0.104652
BB0139	wbmF	nucleotide sugar epimerase	catalytic activity	nucleotide-sugar metabolism	-1.18962	0.0685778	1.59264	0.221324
BB0140	wbmE	putative exported protein		Periplasmic/ Exported/ Lipoprotein	-1.21194	0.0681342	1.02115	0.0212132
BB0141	wbmD	putative membrane protein		Cell envelope	-1.7062	0.0445029	1.12521	0.333754
BB0142	wbmC	putative glutamine amidotransferase	asparagine synthase (glutamine-hydrolyzing) activity	metabolism	-1.28495	0.0294672	-1.08044	0.108894
BB0143	wbmB	hypothetical protein		Unknown proteins, no known homologs	-1.25753	0.0591849	-1.82548	0.11243
BB0144	wbmA	putative glycosyl transferase	transferase activity	biosynthesis	1.31969	0.0597826	1.51565	0.509824
BB0145	bplL, wlbL	lipopolysaccharide biosynthesis protein		Cell envelope	1.36806	0.0989859	-1.27715	0.00212132
BB0146	bplJ, bplK, wlbjK	putative membrane protein		Cell envelope	1.20196	0.360816	NA	NA
BB0147	bplI, wlbI	lipopolysaccharide biosynthesis protein		Cell envelope	1.04033	0.0168474	-1.1284	0.116673
BB0148	bplH, wlbH	putative glycosyl transferase	transferase activity	biosynthesis	1.0067	0.046293	-1.79091	0.0311127
BB0149	bplG, wlbG	probable sugar transferase	transferase activity		-1.10419	0.0481494	-1.76814	0.033234
BB0150	bplF, wlbF	lipopolysaccharide biosynthesis protein		Cell envelope	-1.10966	0.0156853	-1.56143	0.0650538
BB0151	bplE, wlbE	probable glycosyl transferase	transferase activity	biosynthesis	-1.21129	0.0567514	-2.27746	0.00141421
BB0152	bplD, wlbD	UDP-N-acetylglucosamine 2-epimerase	UDP-N-acetylglucosamine 2-epimerase activity	UDP-N-acetylglucosamine metabolism	-1.15387	0.107906	-1.77344	0.0190919
BB0153	bplC, wlbC	lipopolysaccharide biosynthesis protein		Cell envelope	-1.11113	0.0623375	-1.06968	0.164049
BB0154	bplB, wlbB	probable acetyltransferase	transferase activity		-1.21567	0.0470499	1.12521	0.039598
BB0155	bplA, wlbA	probable oxidoreductase	oxidoreductase activity	electron transport	1.09421	0.106175	1.29357	0.0509117
BB0156	rfaC, waaC	probable heptosyltransferase	transferase activity	metabolism	-1.25144	0.0851862	-2.27089	0.111016
BB0157	kdtA, waaA	3-deoxy-D-manno-octulosonic-acid transferase	sugar binding	carbohydrate metabolism	-1.00164	0.0332516	-1.22614	0.0452548
BB0158		putative exported protein		Periplasmic/ Exported/ Lipoprotein	1.43146	0.184859	1.31007	0.0685894
BB0159		putative exported protein		Periplasmic/ Exported/ Lipoprotein	-1.2188	0.0869335	-1.42067	0.230517
BB0160	baf	Bvg accessory factor		regulation of transcription, DNA-dependent	1.04949	0.0778336	-2.16285	0.0869741
BB0161	birA	putative biotin protein ligase	biotin-[acetyl-CoA-carboxylase] ligase activity	protein modification	-1.26155	0.0937058	NA	NA
BB0163		putative integral membrane protein			-1.30618	0.077235	-1.82126	0.0183848
BB0164		probable ATP-binding component of ABCtransporter	ATP-binding cassette (ABC) transporter activity	transport	1.24989	0.0722457	-1.06057	0.000707107
BB0165		putative exported protein		Periplasmic/ Exported/ Lipoprotein	-1.24265	0.0764397	-1.86877	0.0403051
BB0166		putative exported protein		Periplasmic/ Exported/ Lipoprotein	1.03334	0.0790289	1.13832	0.0176777
BB0167		conserved hypothetical protein	catalytic activity	Conserved in organism other than E. coli	1.13812	0.0474494	1.01481	0.0756604
BB0168		putative penicillin-binding protein precursor	serine-type D-Ala-D-Ala carboxypeptidase activity	proteolysis and peptidolysis	1.31552	0.0560966	1.05118	0.0176777
BB0169		probable class IV aminotransferase	transaminase activity	metabolism	1.07456	0.0362645	-1.30825	0.0657609
BB0170		conserved hypothetical protein		Conserved in organism other than E. coli	1.25599	0.0937161	1.29822	0.0714178
BB0171	lipB	lipoate-protein ligase B	acyltransferase activity	lipoate biosynthesis	1.28263	0.126502	NA	NA
BB0172	lipA, lip	lipoic acid synthetase	sulfurtransferase activity	lipoate biosynthesis	1.09228	0.0709062	-1.17378	0.178191
BB0173	rfbC, rmlC	dTDP-4-dehydrorhamnose 3,5-epimerase	lipopolysaccharide biosynthesis	Cell envelope	-1.0364	0.0408067	-1.63485	0.00565685
BB0174	rfbD, rmlD	dTDP-4-dehydrorhamnose reductase	dTDP-4-dehydrorhamnose reductase activity	extracellular polysaccharide biosynthesis	-1.27932	0.0159618	NA	NA
BB0175	rfbB, rmlB	dTDP-glucose 4,6-dehydratase	dTDP-glucose 4,6-dehydratase activity	nucleotide-sugar metabolism	-1.41991	0.015176	-1.43621	0.209304
BB0176		conserved hypothetical protein		Conserved in organism other than E. coli	-1.30314	0.037983	-1.80183	0.039598
BB0177		putative exported protein		Periplasmic/ Exported/ Lipoprotein	-1.07007	0.0707261	-1.61035	0.0834386
BB0178	hslU, htpI	ATP-dependent Hsl protease ATP-binding subunit	chaperone activity	Folding and Ushering	-1.03608	0.0508156	-2.35928	0.0268701
BB0179	hslV, htpO	ATP-dependent protease heat shock protein	endopeptidase activity	Folding and Ushering	-1.1423	0.0613958	-2.53648	NA
BB0180	dksA	putative dnaK suppressor protein			1.07784	0.146335	1.34941	0.0820244
BB0181		conserved hypothetical protein		Conserved in organism other than E. coli	1.09049	0.0768927	-1.07065	0.0608112
BB0182		putative regulatory protein	transcription factor activity	Global Regulatory Functions	1.08171	0.157299	1.3291	0.149907
BB0183		putative transport protein ATP-binding	ATP-binding cassette (ABC) transporter activity	transport	1.37714	0.0546354	1.00338	0.0438406
BB0184		putative ABC transporter permease protein	ATP-binding cassette (ABC) transporter activity	transport	-1.01603	0.1234	1.04019	0.0700036
BB0185		putative periplasmic solute binding protein	binding	transport	-1.35792	0.0151033	NA	NA
BB0186		conserved hypothetical protein		Conserved in organism other than E. coli	-1.34636	0.0726422	NA	NA
BB0187		putative membrane protein		Cell envelope	1.0256	0.0746868	-1.01546	0.0141421
BB0189		putative outer membrane protein	receptor activity	transport	-1.22487	0.118595	-2.82437	0.0629325
BB0190		putative integrase	DNA binding	DNA recombination	-1.01159	0.0434772	-1.29676	0.0360624
BB0191		conserved hypothetical protein		Conserved in organism other than E. coli	-1.12943	0.044449	-2.35928	NA
BB0192	dapF	diaminopimelate epimerase	diaminopimelate epimerase activity	lysine biosynthesis via diaminopimelate	1.24096	0.0684289	NA	NA
BB0193		putative acyltransferase	lipopolysaccharide core region biosynthesis	Cell envelope	1.20628	0.0866319	1.22039	0.153442
BB0194		putative acyltransferase	lipopolysaccharide core region biosynthesis	Cell envelope	1.07159	0.128051	1.09391	0.0565685
BB0195	metK	S-adenosylmethionine synthetase	magnesium ion binding	one-carbon compound metabolism	-1.18251	0.0314208	-1.32511	NA
BB0196		conserved hypothetical protein		Conserved in organism other than E. coli	1.55827	0.295291	1.40651	0.0629325
BB0197		putative glycosyl transferase	transferase activity	biosynthesis	-1.02926	0.170026	-1.78955	0.215668
BB0198	acyH	adenosylhomocysteinase	adenosylhomocysteinase activity	one-carbon compound metabolism	1.01019	0.069327	1.01565	0.19304
BB0199		putative membrane protein		Cell envelope	-1.32865	0.15096	1.21489	0.124451
BB0200		putative methylenetetrahydrofolate reductase	methylenetetrahydrofolate reductase (NADPH) activity	methionine biosynthesis	-1.0778	0.072	-1.30464	0.0381838
BB0201		putative transcriptional regulator	transcription factor activity	Global Regulatory Functions	-1.02596	0.0405986	NA	NA
BB0202		putative aminohydrolase	hydrolase activity		1.13186	0.0808627	-1.20061	0.0487904
BB0203		putative integral membrane transport protein	transporter activity	transport	-1.16649	0.336527	NA	NA
BB0205		5-formyltetrahydrofolate cyclo-ligase familyprotein	ligase activity	metabolism	-1.1365	0.0951839	-1.13545	0.0169706
BB0206		putative transglycosylase			1.40542	0.0774271	-1.03548	0.198697
BB0207	cca	tRNA nucleotidyltransferase	RNA binding	translation	1.10731	0.0901569	-1.49337	0.0346482
BB0208		conserved hypothetical protein	S-adenosylmethionine-dependent methyltransferase activity	Conserved in organism other than E. coli	-1.00856	0.216149	NA	NA
BB0209		putative ATP-dependent RNA helicase	nucleic acid binding		1.66453	0.236081	-1.27234	NA
BB0210	ung	uracil-DNA glycosylase	uracil DNA N-glycosylase activity	carbohydrate metabolism	-1.24537	0.205006	-2.8076	0.155563
BB0211		haloacid dehalogenase-like hydrolase	hydrolase activity	metabolism	1.08297	0.0514852	-1.16798	NA
BB0212		phosphorylase family protein	catalytic activity	nucleoside metabolism	-1.12339	0.0737651	-1.02738	0.0106066
BB0213		conserved hypothetical protein		Conserved in organism other than E. coli	1.18157	0.0845302	1.16413	0.0183848
BB0214		AraC family transcriptional regulator	transcription factor activity	Global Regulatory Functions	-2.25773	0.114138	NA	NA	negative	-1.4886	0	5.56778
BB0215	fur	ferric uptake regulation protein	transcription factor activity	Global Regulatory Functions	-1.7081	0.135485	NA	NA
BB0216		conserved hypothetical protein		Conserved in organism other than E. coli	-1.06286	0.149931	NA	NA
BB0217		putative Na+		sodium ion transport	1.16833	0.0485604	-1.99325	NA
BB0218		hypothetical protein		Unknown proteins, no known homologs	1.23643	0.0943756	-1.87917	NA
BB0219		putative glycosyl transferase	transferase activity	biosynthesis	1.37059	0.0698276	1.13832	0.00212132
BB0220		conserved hypothetical protein		Conserved in organism other than E. coli	1.29231	0.0855669	1.10364	0.106773
BB0221		acetyltransferase (GNAT) family protein	N-acetyltransferase activity		1.17949	0.10406	1.10068	0.168291
BB0222		conserved hypothetical protein		Conserved in organism other than E. coli	-1.03592	0.0168721	-1.38084	0.0296985
BB0223		metallo-beta-lactamase superfamily protein			-1.08574	0.0727362	-1.15261	0.0756604
BB0224		ArsR family regulatory protein	transcription factor activity	Global Regulatory Functions	-1.10765	0.0726953	-1.20797	0.026163
BB0225		putative membrane protein		Cell envelope	1.16967	0.0818472	1.24831	0.026163
BB0226		putative membrane protein		Cell envelope	-1.32087	0.113965	-1.41982	0.147785
BB0227		putative phenylacetate-CoA ligase	ligase activity	metabolism	1.13789	0.0381802	-1.90645	0.0509117
BB0228		ABC transporter ATP-binding protein	ATP-binding cassette (ABC) transporter activity	transport	1.2804	0.0347365	1.05415	0.0537401
BB0229		putative exported protein		Periplasmic/ Exported/ Lipoprotein	1.21655	0.248396	-1.98489	0.0190919
BB0230		putative branched-chain amino acid transportsystem permease	transporter activity	transport	-1.16868	0.147533	-1.49337	0.0162635
BB0231		putative branched-chain amino acid transportsystem permease	transporter activity	transport	1.31523	0.0810898	1.23519	0.113137
BB0232		putative high-affinity branched-chain amino acidtransport ATP-binding protein	ATP-binding cassette (ABC) transporter activity	transport	1.32237	0.0187357	1.11887	0.00212132
BB0233		putative AMP-binding enzyme	catalytic activity	metabolism	1.2996	0.078002	1.12944	0.046669
BB0234		cyclic nucleotide-binding protein			-1.16467	0.0577357	-1.63712	NA
BB0235		probable transporter	lysine permease activity	transport	1.09644	0.0166321	-1.06583	0.00565685
BB0236		probable LysR-family transcriptional regulator	transcription factor activity	Global Regulatory Functions	1.04554	0.0819672	-1.04187	0.0487904
BB0237		putative exported protein		Periplasmic/ Exported/ Lipoprotein	-1.12245	0.0318001	1.39255	0.0127279
BB0238		putative exported protein		Periplasmic/ Exported/ Lipoprotein	-1.2723	0.0279158	1.20854	0.385373
BB0239		conserved hypothetical protein	alanine racemase activity	Conserved in organism other than E. coli	-1.21933	0.0645528	-1.27302	0.00636396
BB0240		probable aminotransferase	transaminase activity	biosynthesis	-1.01038	0.0347435	-1.64281	0.289207
BB0241		amino acid-binding periplasmic protein	transporter activity	transport	1.06325	0.048438	1.06261	0.0890955
BB0242		putative membrane protein		Cell envelope	-1.03052	0.133829	-1.83256	0.148492
BB0243	hmgcL	hydroxymethylglutaryl-CoA lyase	hydroxymethylglutaryl-CoA lyase activity		1.14065	0.0646986	1.42132	0.0777817
BB0244	smf	conserved hypothetical protein		DNA mediated transformation	-1.09616	0.148311	-3.10644	0.00212132
BB0245	lrp, alsB, livR, ihb, oppI	leucine-responsive regulatory protein	transcription factor activity	Global Regulatory Functions	1.2784	0.139228	-1.11195	0.0721249
BB0246		conserved hypothetical protein		Conserved in organism other than E. coli	-1.00584	0.0838791	-1.54712	0.141421
BB0247	def, fms	polypeptide deformylase	formylmethionine deformylase activity	protein biosynthesis	1.03989	0.0437178	-1.72052	0.0551543
BB0248	fmt	methionyl-tRNA formyltransferase	methionyl-tRNA formyltransferase activity	translation	-1.08005	0.0552657	-1.04233	0.142836
BB0249		conserved hypothetical protein	pyridoxamine-phosphate oxidase activity	pyridoxine biosynthesis	-1.43415	0.0561138	-2.4346	0.0643467
BB0250		probable haloacid dehalogenase-like hydrolase	hydrolase activity	metabolism	-1.0356	0.0306949	-1.31773	0.0311127
BB0251		hypothetical protein		Unknown proteins, no known homologs	-1.09519	0.138612	-2.68636	0.156978
BB0252		putative lysine decarboxylase			1.02084	0.14421	-3.65379	0.0685894
BB0253		bacterioferritin	ferric iron binding	iron ion transport	1.00283	0.0590497	1.05753	0.0523259
BB0254		conserved hypothetical protein		Conserved in organism other than E. coli	1.30124	0.112308	-1.87917	0.0650538
BB0255		putative 4-oxalocrotonate tautomerase	isomerase activity	aromatic compound metabolism	-1.23556	0.034031	-3.2428	0.0304056
BB0256		conserved hypothetical protein		Conserved in organism other than E. coli	-1.06397	0.0804598	-2.71412	0.00353553
BB0257		putative exported protein		Periplasmic/ Exported/ Lipoprotein	-1.29986	0.226099	-3.11462	0.0205061
BB0258		probable transcriptional regulator	transcription factor activity	Global Regulatory Functions	-1.20154	0.0676368	-1.31846	0.224153
BB0259		putative dioxygenase	oxidoreductase activity, acting on single donors with incorporation of molecular oxygen, incorporation of two atoms of oxygen		-1.1847	0.0348673	-2.25788	0.0502046
BB0260		conserved hypothetical protein		Conserved in organism other than E. coli	-1.09039	0.0669547	1.09137	0.0381838
BB0261		putative amino acid efflux protein	lysine permease activity	transport	-1.2151	0.0828424	-1.37442	NA
BB0262		conserved hypothetical protein	S-adenosylmethionine-dependent methyltransferase activity	Conserved in organism other than E. coli	-1.26678	0.18819	-2.96985	0.0933381
BB0263		putative exported protein		Periplasmic/ Exported/ Lipoprotein	-1.27908	0.114951	-2.95131	0.092631
BB0264		putative two-component sensor kinase	two-component sensor molecule activity	signal transduction	1.21462	0.0797945	1.39848	0.0381838
BB0265		putative two-component response regulator	two-component response regulator activity	Global Regulatory Functions	1.32669	0.168649	-1.11404	0.0848528
BB0266	trkA	Trk system potassium uptake protein	cation transporter activity	potassium ion transport	1.07382	0.0710618	-1.50669	0.129401
BB0267	trkH	Trk system potassium uptake protein	cation transporter activity	transport	1.05537	0.0314318	-1.15712	0.013435
BB0268		probable MarR-family transcriptional regulator	transcription factor activity	Global Regulatory Functions	1.18693	0.0316201	1.02538	0.0509117
BB0269		conserved hypothetical protein		Conserved in organism other than E. coli	1.34246	0.115236	1.24027	0.0947523
BB0270		conserved hypothetical protein		Conserved in organism other than E. coli	1.02203	0.0934515	1.1544	0.101116
BB0271		conserved hypothetical protein	aminocarboxymuconate-semialdehyde decarboxylase activity	metabolism	-1.15447	0.0325679	-1.25212	0.130108
BB0272	maiA	maleate cis-trans isomerase		metabolism	1.09094	0.121996	1.12183	0.0692965
BB0274		conserved hypothetical protein		Conserved in organism other than E. coli	-1.16306	0.0458878	-1.41303	0.0643467
BB0275		putative isochorismatase			-1.06786	0.0467844	-1.44499	0.0438406
BB0276		probable ring hydroxylating beta subunit	catalytic activity	electron transport	1.05209	0.067185	-1.49715	0.00919239
BB0277		probable Ring hydroxylating alpha subunit	iron ion binding	electron transport	-1.06129	0.0816143	-2.9403	NA
BB0278		putative ferredoxin reductase	disulfide oxidoreductase activity	metabolism	-1.19343	0.10394	-2.20728	0.101116
BB0279		ferredoxin	oxidoreductase activity	metabolism	-1.00209	0.117396	-1.81011	0.137179
BB0280		putative exported protein		transport	1.00685	0.0784915	-1.098	0.126572
BB0281		oxidoreductase, large chain	oxidoreductase activity	electron transport	-1.24334	0.0661673	-2.5978	NA
BB0282		oxidoreductase, medium chain	oxidoreductase activity	electron transport	1.32936	0.206897	1.35491	0.0417193
BB0283		putative iron-sulfur binding protein	electron transporter activity	electron transport	-1.34112	0.0445009	NA	NA
BB0284		putative exported protein		Periplasmic/ Exported/ Lipoprotein	-1.13881	0.0623173	-1.75371	0.0183848
BB0285		probable ABC transporter, ATP-binding component	ATP-binding cassette (ABC) transporter activity	transport	-1.36565	0.098503	NA	NA
BB0286		ABC transporter, permease component	transporter activity	transport	-1.05645	0.0481733	1.05034	0.013435
BB0287		putative membrane protein		Cell envelope	1.05135	0.0961557	1.30372	0.166877
BB0288		putative membrane protein		Cell envelope	1.22018	0.0971471	-1.10261	0.00141421
BB0289		conserved hypothetical protein	glutamate-cysteine ligase activity	glutathione biosynthesis	1.11177	0.110511	NA	NA
BB0290		conserved hypothetical protein	S-adenosylmethionine-dependent methyltransferase activity	Conserved in organism other than E. coli	-1.10084	0.0724527	NA	NA
BB0291		conserved hypothetical protein		Conserved in organism other than E. coli	-1.27544	NA	NA	NA
BB0292		rRNA methylase	RNA binding	RNA processing	1.03765	0.0884675	-1.71802	NA
BB0293		putative exported protein		Periplasmic/ Exported/ Lipoprotein	-1.17795	0.0445104	-1.12571	0.104652
BB0294	gpsA	glycerol-3-phosphate dehydrogenase [NAD(P)+]	glycerol-3-phosphate dehydrogenase (NAD+) activity	metabolism	1.11996	0.092261	-1.14313	0.00989949
BB0295	secB	protein-export protein	chaperone activity	transport	-1.12452	0.106269	-1.13654	0.152735
BB0296	grxC	glutaredoxin 3	electron transporter activity	electron transport	1.15709	0.0599422	-1.22933	0.0106066
BB0297		conserved hypothetical protein		Conserved in organism other than E. coli	-1.00818	0.0543375	-1.15712	0.0685894
BB0298	gpmA, gpm	phosphoglycerate mutase 1	glycolysis	metabolism	-1.18857	0.185048	1.1599	0.046669
BB0299		putative peptidase	metalloendopeptidase activity	proteolysis and peptidolysis	1.05159	0.169319	-1.12251	0.0806102
BB0300	ctpA	putative carboxy-terminal processing proteaseprecursor	protein binding	Folding and Ushering	-1.06011	0.0616131	1.01946	0.0763675
BB0301	thiF	adenylyltransferase	nucleotidyltransferase activity		1.04783	0.138809	-1.36332	NA
BB0302		putative GntR-family transcriptional regulator	transcription factor activity	Global Regulatory Functions	1.15821	0.140837	NA	NA
BB0303		putative oxidoreductase		electron transport	1.19214	0.166891	NA	NA
BB0304	thiC	thiamine biosynthesis protein		thiamin biosynthesis	1.13231	0.0798745	-1.23446	0.0756604
BB0305		putative lipoprotein		Periplasmic/ Exported/ Lipoprotein	1.37913	0.0659921	NA	NA
BB0306		putative restriction endonuclease	endonuclease activity		1.62956	0.0928315	1.12479	0.1492
BB0307		putative DNA methylase	methyltransferase activity		-1.05287	0.22689	-2.62667	NA
BB0308		putative transcriptional regulator	DNA binding	Global Regulatory Functions	1.53483	0.110296	-2.19907	0.0487904
BB0309		putative transcriptional regulator	DNA binding	Global Regulatory Functions	1.12606	0.0672842	-1.30176	0.148492
BB0310		putative transcriptional regulator			1.16736	0.080503	NA	NA
BB0311	proB	glutamate 5-kinase	RNA binding	proline biosynthesis	1.02015	0.178329	NA	NA
BB0312		probable GTP-binding protein	GTP binding		-1.44744	0.0946734	1.35533	0.203647
BB0313	rpmA	50S ribosomal protein L27	structural constituent of ribosome	translation	1.19289	0.031964	1.22589	0.0509117
BB0314	rplU	50S ribosomal protein L21	RNA binding	translation	1.54993	0.122078	1.23223	0.0120208
BB0315		conserved hypothetical protein		Conserved in organism other than E. coli	1.21536	0.0592728	NA	NA
BB0316	ispB, cel	octaprenyl-diphosphate synthase	transferase activity	isoprenoid biosynthesis	1.34127	0.0984385	1.10237	0.066468
BB0317		LysR-family transcriptional regulator	transcription factor activity	Global Regulatory Functions	1.15218	0.0594662	NA	NA
BB0318	hyuA	putative hydantoin utilization protein A	hydrolase activity		NA	NA	NA	NA
BB0319	hyuB	hydantoin utilization protein B	catalytic activity		1.02292	0.147064	NA	NA
BB0320		putative amino acid deaminase	oxidoreductase activity	electron transport	-1.15805	0.122117	-1.37203	0.0176777
BB0321		putative exported protein		Periplasmic/ Exported/ Lipoprotein	1.07933	0.0902913	-1.5	0.113137
BB0322	gabD	succinate-semialdehyde dehydrogenase [NADP+]	succinate-semialdehyde dehydrogenase [NAD(P)+] activity	metabolism	-1.07763	0.0917691	-1.17964	0.0410122
BB0323	cyaC, HlyC	cyclolysin-activating lysine-acyltransferase	acyltransferase activity	transport	1.44352	0.0752291	NA	NA
BB0324	cyaA, cya	bifunctional hemolysin-adenylate cyclaseprecursor	adenylate cyclase activity	Periplasmic/ Exported/ Lipoprotein	13.5135	4.79255	-4.82449	0.0339411	positive	3.85576	0	0
BB0325	cyaB	cyclolysin secretion ATP-binding protein	ATP-binding cassette (ABC) transporter activity	transport	1.27832	0.246926	-2.0755	0.0233345
BB0326	cyaD	cyclolysin secretion protein	protein transporter activity	transport	1.3435	0.0306548	1.15482	0.0183848
BB0327	cyaE	cyclolysin secretion protein	transporter activity	transport	1.28516	0.171061	-1.90799	0.0601041
BB0328	cyaX	probable LysR-family transcriptional regulator	transcription factor activity	Global Regulatory Functions	1.0782	0.146994	-1.58764	0.0629325
BB0329		probable extracellular solute-binding protein	transporter activity	transport	-1.01175	0.129565	-1.40714	0.0254558
BB0330	gltJ	glutamate	transporter activity	transport	1.43012	0.0644219	1.26311	0.0777817
BB0331	gltK	glutamate	transporter activity	transport	-1.08695	0.043517	-1.6766	NA
BB0332	gltL	glutamate	ATP-binding cassette (ABC) transporter activity	transport	-1.03752	0.0919125	-1.35862	0.00848528
BB0333		probable aminotransferase	transaminase activity	metabolism	-1.36787	0.221233	-3.94	0.125865
BB0334		putative membrane protein		Cell envelope	-1.23466	0.0784861	-1.28758	0.0537401
BB0335		putative exported protein		Periplasmic/ Exported/ Lipoprotein	-1.27428	0.0510229	NA	NA
BB0336		putative acetoacetyl-CoA reductase	acetoacetyl-CoA reductase activity	metabolism	1.13172	0.0465823	1.16836	0.0989949
BB0337		putative acetolactate synthase large subunit	acetolactate synthase activity		1.17175	0.0829339	1.40355	0.127279
BB0338		probable GntR-family transcriptional regulator	transcription factor activity	Global Regulatory Functions	-1.00686	0.135367	-1.59085	0.0282843
BB0339		hypothetical protein		Unknown proteins, no known homologs	-1.04122	0.0483148	-1.0874	0.111723
BB0340		hypothetical protein		Unknown proteins, no known homologs	-1.03704	0.0451777	-1.0516	0.145664
BB0341		probable GntR-family transcriptional regulator	transcription factor activity	Global Regulatory Functions	1.4139	0.0901649	1.31472	0.00565685
BB0342		probable Zinc-binding dehydrogenase	alcohol dehydrogenase activity, zinc-dependent	metabolism	-1.01465	0.0765013	1.20558	0.282843
BB0343		putative acetyl-CoA synthetase	catalytic activity	metabolism	-1.24035	0.12112	-1.64739	0.0869741
BB0344		conserved hypothetical protein		Conserved in organism other than E. coli	-1.11834	0.0779815	-1.36097	0.092631
BB0345		putative membrane protein	transporter activity	transport	1.00491	0.0321016	-1.21231	0.0777817
BB0346		probable ABC transporter, ATP-binding component	ATP-binding cassette (ABC) transporter activity	transport	-1.47037	0.0971291	-2.29738	0.194454
BB0347		putative exported protein		Periplasmic/ Exported/ Lipoprotein	-1.28569	0.128486	-3.09424	0.0155563
BB0348		putative dioxygenase	oxidoreductase activity, acting on single donors with incorporation of molecular oxygen, incorporation of two atoms of oxygen		1.02485	0.117833	-1.40714	0.0565685
BB0349	ilvB	putative acetolactate synthase large subunit	acetolactate synthase activity		-1.19279	0.15113	-1.87025	0.0961665
BB0350		putative mechanosensitive channel protein			-1.16226	0.0885177	-1.21793	0.092631
BB0351		LysR family regulatory protein	transcription factor activity	Global Regulatory Functions	1.08558	0.0594478	-1.07114	0.053033
BB0352		CAIB		metabolism	-1.35573	0.0265016	-3.63692	0.0226274
BB0353		conserved hypothetical protein	citrate (pro-3S)-lyase activity	Conserved in organism other than E. coli	1.39515	0.175617	1.55034	0.0304056
BB0354		GntR family regulatory protein	transcription factor activity	Global Regulatory Functions	1.5416	0.275931	1.44628	0.013435
BB0355		conserved hypothetical protein	lyase activity	Conserved in organism other than E. coli	-1.17784	0.0319932	-2.11828	NA
BB0356		putative dehydratase	lyase activity		-1.22286	0.0412823	-1.54207	0.00919239
BB0357		putative exported protein		Periplasmic/ Exported/ Lipoprotein	-1.30441	0.0409095	NA	NA
BB0358		putative exported protein		Periplasmic/ Exported/ Lipoprotein	-1.36371	0.121634	-2.13743	0.130108
BB0359		hypothetical protein	hydrolase activity		1.05864	0.0602333	-1.27853	0.101116
BB0360		transcriptional regulator	DNA binding	Global Regulatory Functions	-1.11113	0.0302516	-1.50862	0.0219203
BB0361	scoB	putative succinyl-CoA:3-ketoacid-coenzyme Atransferase subunit B protein	3-oxoacid CoA-transferase activity	metabolism	-1.13095	0.0558739	1.0681	0.092631
BB0362	scoA	putative succinyl-CoA:3-ketoacid-coenzyme Atransferase subunit A	CoA-transferase activity	metabolism	-1.01849	0.0552122	1.17766	0.079196
BB0363		LysR family regulatory protein	transcription factor activity	Global Regulatory Functions	1.00015	0.0496595	-1.14646	0.114551
BB0364		enoyl-CoA hydratase	isomerase activity	metabolism	1.19646	0.156294	1.13959	0.0424264
BB0365		conserved hypothetical protein	phosphogluconate dehydrogenase (decarboxylating) activity	pentose-phosphate shunt	-1.36648	0.118785	-3.11053	NA
BB0366		putative exported protein		Periplasmic/ Exported/ Lipoprotein	1.26626	0.100436	1.21743	0.236174
BB0367		branched-chain amino acid transport systempermease	transporter activity	transport	1.03661	0.0847909	1.0681	0.0898026
BB0368		branched-chain amino acid transport systempermease	transporter activity	transport	-1.25495	0.0524771	-1.576	0.169706
BB0369		ABC transport system ATP-binding protein	ATP-binding cassette (ABC) transporter activity	transport	-1.13	0.044	-2	NA
BB0370		ABC transport system ATP-binding protein	ATP-binding cassette (ABC) transporter activity	transport	1.10463	0.109761	-2.19295	NA
BB0371		putative short chain dehydrogenase	oxidoreductase activity	metabolism	-2.08924	0.0862661	-3.49704	NA	negative	-1.88453	0	0.535655
BB0372		conserved hypothetical protein		Conserved in organism other than E. coli	-1.22991	0.0305	-3.80064	NA
BB0373		putative short chain dehydrogenase	oxidoreductase activity	metabolism	1.28308	0.094821	-2.11638	0.0473762
BB0374		NADH:flavin oxidoreductase	oxidoreductase activity	metabolism	-1.1392	0.0577598	NA	NA
BB0375		putative exported protein		Periplasmic/ Exported/ Lipoprotein	-1.39688	0.0826102	NA	NA
BB0376		putative membrane protein		Cell envelope	-1.01865	0.0698196	-1.71056	NA
BB0377		putative membrane protein		Cell envelope	-1.45056	0.0806546	NA	NA
BB0378		sensor kinase protein	two-component sensor molecule activity	signal transduction	1.4401	0.194997	1.46235	0.0671751
BB0379		transcriptional regulatory protein	two-component response regulator activity	Global Regulatory Functions	-1.13573	0.069173	-1.27715	0.111016
BB0380		conserved hypothetical protein		Conserved in organism other than E. coli	-1.29761	0.080077	NA	NA
BB0381		hypothetical protein		Unknown proteins, no known homologs	-1.34152	0.0532844	NA	NA
BB0382		hypothetical protein		Unknown proteins, no known homologs	-1.1189	0.0525645	-1.60598	NA
BB0383	hemA	glutamyl-tRNA reductase	glutamyl-tRNA reductase activity	translation	-1.19704	0.0319121	-1.72303	0.00282843
BB0384	prfA, sueB, uar	peptide chain release factor 1	translation release factor activity, codon specific	translation	1.24215	0.113697	1.18486	0.0572756
BB0385	hemK	heme biosynthesis protein	protein methyltransferase activity	protein amino acid methylation	1.14794	0.0739291	-1.03503	0.121622
BB0386		conserved hypothetical protein		Conserved in organism other than E. coli	1.22355	0.126542	1.29526	0.0226274
BB0387		probable flavoprotein			-1.04349	0.068599	-1.08143	0.0919239
BB0388		putative exported protein		Periplasmic/ Exported/ Lipoprotein	-1.07573	0.100792	NA	NA
BB0389		4,5-dihydroxyphthalate decarboxylase	4,5-dihydroxyphthalate decarboxylase activity		-1.08564	0.0749941	1.02707	0.0268701
BB0390		molybdopterin dehydrogenase	oxidoreductase activity	electron transport	1.26641	0.188827	1.45347	0.0410122
BB0391		probable 2Fe-2S ferredoxin	electron transporter activity	metabolism	1.01265	0.0883263	-1.46924	0.0459619
BB0392		probable dehydrogenase	oxidoreductase activity	electron transport	1.0512	0.0659689	-1.19515	0.0296985
BB0393		conserved hypothetical protein		Conserved in organism other than E. coli	-1.24426	0.084	NA	NA
BB0394		conserved hypothetical protein		Conserved in organism other than E. coli	1.00461	0.13512	-1.34471	0.0141421
BB0395		putative exported protein		Periplasmic/ Exported/ Lipoprotein	1.17071	0.123089	-1.14093	0
BB0396		conserved hypothetical protein		Conserved in organism other than E. coli	1.06623	0.185007	-1.16339	0.00141421
BB0397	cysI	putative sulfite reductase	sulfite reductase (ferredoxin) activity	electron transport	1.9299	0.508502	-1.28339	0.00282843	positive	1.56136	0	3.84181
BB0398		conserved hypothetical protein		Conserved in organism other than E. coli	1.11195	0.102669	-1.25611	0.0325269
BB0399		putative branched-chain amino acid transportATP-binding ABC transporter	ATP-binding cassette (ABC) transporter activity	transport	-1.15566	0.243616	NA	NA
BB0400		putative branched-chain amino acid transportATP-binding ABC transporter	ATP-binding cassette (ABC) transporter activity	transport	1.33695	0.0316832	1.05922	0.0735391
BB0401		putative branched-chain amino acid transportpermease	transporter activity	transport	-1.09931	0.2269	NA	NA
BB0402		putative branched-chain amino acid transportpermease	transporter activity	transport	1.22072	0.0407574	NA	NA
BB0403		putative LysR-family transcriptional regulator	transcription factor activity	Global Regulatory Functions	1.0567	0.0988891	-1.02293	0.231224
BB0404		putative branched-chain amino acid bindingprotein			-1.01175	0.0854148	-1.42238	0.0650538
BB0405		putative amidase	amidase activity		-1.14249	0.0945591	-1.22997	0.0537401
BB0406		putative carbonic anhydrase	carbonate dehydratase activity	carbon utilization	-1.12152	0.0724696	1.00465	0.0346482
BB0407		putative exported protein		Periplasmic/ Exported/ Lipoprotein	1.14139	0.0502669	-1.03548	0.0190919
BB0408	psiF	phosphate starvation-inducible proteinprecursor			-1.19576	0.0671892	1.05626	0.0558614
BB0409		conserved hypothetical protein		Conserved in organism other than E. coli	-1.09323	0.137828	-2.07368	0.140007
BB0410	catD2	3-oxoadipate enol-lactone hydrolase	3-oxoadipate enol-lactonase activity		-1.13689	0.0662307	-1.54611	0.0544472
BB0411		conserved hypothetical protein		Conserved in organism other than E. coli	-1.24127	0.0565529	1.63579	0.0968736
BB0412	catC2, mmlJ	methylmuconolactone isomerase	muconolactone delta-isomerase activity	aromatic compound metabolism	-1.83229	0.0140841	2.9412	0.108187
BB0413	catJ, pcaJ	3-oxoadipate CoA-transferase subunit B	3-oxoadipate CoA-transferase activity	metabolism	1.34663	0.0597403	-1.14313	0.0749533
BB0414	catI, pcaI	3-oxoadipate CoA-transferase subunit A	3-oxoadipate CoA-transferase activity	metabolism	1.26596	0.0355234	1.19882	0.0509117
BB0415		probable transcriptional regulator	DNA binding	Global Regulatory Functions	-1.07195	0.0282154	-1.14038	0.0275772
BB0416		probable short-chain dehydrogenase	oxidoreductase activity	metabolism	-1.55353	0.134153	-2.27965	0.0374767
BB0417		short-chain fatty acids transporter	short-chain fatty acid transporter activity	transport	-1.33568	0.132419	-2.34757	0.0445477
BB0418		3-hydroxybutyryl-CoA dehydrogenase	3-hydroxybutyryl-CoA dehydrogenase activity	fatty acid metabolism	-1.25425	0.103898	-1.73441	0.170413
BB0419	sphB1	autotransporter subtilisin-like protease	pathogenesis	transport	8.02262	1.88156	-3.49188	0.00353553	positive	4.41855	0	0.0372288
BB0420	ppc	phosphoenolpyruvate carboxylase	tricarboxylic acid cycle	metabolism	-1.59634	0.119463	-2.4321	0.0183848
BB0421		Conserved hypothetical protein		Conserved in organism other than E. coli	-1.14884	0.173425	-2.10695	0.0707107
BB0422		putative acetyltransferase	N-acetyltransferase activity		-1.44215	0.141781	-2.25143	0.0608112
BB0423		putative hydrolase	hydrolase activity		-1.23488	0.127885	-2.02918	0.0572756
BB0424		putative regulatory protein			1.1402	0.0463209	1.03173	0.0205061
BB0425		putative 2-hydroxyacid dehydrogenase	oxidoreductase activity, acting on the CH-OH group of donors, NAD or NADP as acceptor	L-serine biosynthesis	-1.29187	0.166687	-3.07812	0.0494975
BB0426		probable extracellular solute-binding protein,family 5	transporter activity	transport	1.0579	0.0439808	-2.26654	0.105359
BB0427		putative acetyl esterase	catalytic activity		-1.45622	0.0295888	NA	NA
BB0428		probable transcriptional regulator	transcription factor activity	Global Regulatory Functions	-1.69057	0.102491	NA	NA
BB0429	leuA	2-isopropylmalate synthase	2-isopropylmalate synthase activity	metabolism	-1.32871	0.0353319	-3.152	0.0381838
BB0430		probable transcriptional regulator	transcription factor activity	Global Regulatory Functions	-1.06078	0.0243059	1.17343	0.00282843
BB0431	ilvD	dihydroxy-acid dehydratase	dihydroxy-acid dehydratase activity	isoleucine biosynthesis	1.04361	0.0384462	-1.33635	0.0502046
BB0432		conserved hypothetical protein		Conserved in organism other than E. coli	-1.85864	0.0158045	-1.86288	0.119501
BB0433		putative 5'(3')-deoxyribonucleotidase	hydrolase activity		1.02426	0.0383406	-3.31092	0.0636396
BB0434		putative 2'-5' RNA ligase	ligase activity		-1.35218	0.0717149	-1.82548	0.0813173
BB0435		putative exported protein	transporter activity	transport	-1.32446	0.102569	-1.81706	0.0176777
BB0436		putative multidrug-efflux system protein	transporter activity	transport	1.09391	0.0314282	1.26354	0.1492
BB0437		HlyD family secretion protein	protein transporter activity	protein secretion	1.13663	0.0443211	-1.19636	0.0551543
BB0438		LysR family regulatory protein	transcription factor activity	Global Regulatory Functions	1.24632	0.0455534	1.08503	0.00777817
BB0439		putative membrane protein		Cell envelope	-1.44831	0.107123	-1.69828	0.200818
BB0440		conserved hypothetical protein		Conserved in organism other than E. coli	-1.11704	0.0825646	-2.05744	0.287792
BB0441		putative potassium channel protein	potassium channel activity	potassium ion transport	-1.19982	0.0339329	NA	NA
BB0442		conserved hypothetical protein		Conserved in organism other than E. coli	-1.58504	0.123073	-2.52834	0.0643467
BB0443		probable glutathione S-transferase	transferase activity		-1.12508	0.0505916	-2.0503	0.0671751
BB0444		putative exported protein		Periplasmic/ Exported/ Lipoprotein	-3.22719	0.021848	-3.13944	0.0643467	negative	-4.19109	0	0
BB0445		conserved hypothetical protein		Conserved in organism other than E. coli	-1.08687	0.0697976	-1.85995	0.013435
BB0446		putative metal-activated pyridoxal enzyme	alanine racemase activity		1.04539	0.123929	-2.30634	0.0205061
BB0447		probable haloacid dehalogenase	hydrolase activity, acting on acid halide bonds, in C-halide compounds	metabolism	1.20271	0.054273	-1.32289	0.0516188
BB0448		probable transcriptional regulator	transcription factor activity	Global Regulatory Functions	-1.16649	0.0783288	-1.41982	0.129401
BB0449		putative integrase			-1.33818	0.136507	-3.88177	0.0403051
BB0450		autotransporter		transport	1.45691	0.199888	1.42428	0.171827
BB0450A		hypothetical protein		Unknown proteins, no known homologs	-1.2966	0.00581187	-3.59817	0.0403051
BB0451	ecnA1	entericidin A anti-toxin precursor			-1.45736	0.0290338	-1.02515	0.0551543
BB0452		autotransporter		transport	13.6997	3.7979	NA	NA	positive	4.64722	0	0.0643652
BB0453		conserved hypothetical protein		Conserved in organism other than E. coli	1.28918	0.079544	-1.84256	0.0431335
BB0454		putative exported protein		Periplasmic/ Exported/ Lipoprotein	-1.44644	0.0727485	-2.53921	0.108187
BB0455		putative substrate-CoA ligase	ligase activity	metabolism	-1.02283	0.0272622	-1.30752	0.0975807
BB0456		probable transcriptional regulator	DNA binding	regulation of transcription, DNA-dependent	-1.01297	0.0378142	-1.74852	0.0636396
BB0457		probable enoyl-CoA hydratase	isomerase activity	metabolism	2.36494	0.171069	-3.39655	0.0919239	positive	3.77874	0	0
BB0458		probable carboxymuconolactone decarboxylase	catalytic activity	aromatic compound metabolism	1.86947	0.183415	-1.58658	0.0523259
BB0459		putative exported protein		Periplasmic/ Exported/ Lipoprotein	-1.22621	0.129484	-4.28261	NA
BB0460		zinc-binding dehydrogenase	alcohol dehydrogenase activity, zinc-dependent		-1.89321	0.0589637	1.09433	0.053033
BB0461		conserved hypothetical protein		metabolism	1.18812	0.153113	1.03088	0.0473762
BB0462		LysR-family transcriptional regulator	transcription factor activity	Global Regulatory Functions	-1.12343	0.0947678	-1.04787	0.100409
BB0463		conserved hypothetical protein	oxidoreductase activity	metabolism	1.08945	0.085968	-3.35795	0.0707107
BB0464		putative dehydratase		metabolism	-1.12886	0.0825197	-2.49367	NA
BB0465		putative exported protein		Periplasmic/ Exported/ Lipoprotein	-1.16447	0.0324743	-1.11615	0.0480833
BB0466		probable LysR-family transcriptional regulator	transcription factor activity	Global Regulatory Functions	1.06296	0.0946255	1.1912	0.086267
BB0467		conserved hypothetical protein		Conserved in organism other than E. coli	-1.06423	0.0180895	-2.20935	NA
BB0468		putative molybdopterin oxidoreductase	electron transporter activity	electron transport	-1.39746	0.0506897	NA	NA
BB0469		short-chain fatty acids transporter	short-chain fatty acid transporter activity	transport	-1.20154	0.108877	-2.65618	NA
BB0470		putative GntR-family transcriptional regulator	transcription factor activity	Global Regulatory Functions	-1.43538	0.0734173	-1.66479	NA
BB0471		putative exported protein		Periplasmic/ Exported/ Lipoprotein	-1.16105	0.0633655	NA	NA
BB0472	cspA	cold shock protein	DNA binding	Global Regulatory Functions	-1.2188	0.0545293	-2.1259	0.0127279
BB0473		probable LysR-family transcriptional regulator	transcription factor activity	Global Regulatory Functions	1.38652	0.283668	1.91244	0.207182
BB0474		putative exported protein		Periplasmic/ Exported/ Lipoprotein	-1.36316	0.0847678	-1.03096	0.279307
BB0475		putative sulfatase	sulfuric ester hydrolase activity	metabolism	-1.44355	0.0720421	-2.33828	0.0388909
BB0476		conserved hypothetical protein		Conserved in organism other than E. coli	-1.38937	0.077	NA	NA
BB0477		conserved hypothetical protein		Conserved in organism other than E. coli	-2.10627	0.152834	NA	NA	negative	-1.80246	0	1.27463
BB0478		conserved hypothetical protein	N-acetylglucosamine-6-phosphate deacetylase activity	N-acetylglucosamine metabolism	-1.23807	0.085614	NA	NA
BB0479		hypothetical protein	ATP binding	transport	NA	NA	NA	NA
BB0480		conserved hypothetical protein		Conserved in organism other than E. coli	-1.03521	0.0129832	NA	NA
BB0481		putative TetR-family transcriptional regulator	transcription factor activity	Global Regulatory Functions	1.30004	0.269127	-1.03866	0.0311127
BB0482		hypothetical protein		Unknown proteins, no known homologs	1.09228	0.166849	1.22927	0.142836
BB0483		conserved hypothetical protein		Conserved in organism other than E. coli	-2.94112	0.0328947	-2.35928	0.115966	negative	-3.14524	0	0
BB0484		hypothetical protein		Unknown proteins, no known homologs	-4.08698	0.016773	-4.17668	NA	negative	-2.89578	0	0
BB0484A		hypothetical protein		Unknown proteins, no known homologs	1.31984	0.212727	1.9264	0.147078
BB0485		plasmid-related protein			-1.79965	0.0594872	1.27707	0.0657609
BB0486		hypothetical protein		Unknown proteins, no known homologs	1.04123	NA	NA	NA
BB0487		hypothetical protein		Unknown proteins, no known homologs	NA	NA	NA	NA
BB0488	virB6	plasmid-related membrane protein		conjugation with cellular fusion	-3.27437	NA	-3.571	NA
BB0489		plasmid-related lipoprotein		Periplasmic/ Exported/ Lipoprotein	-1.01453	0.210161	-2.10695	0.0806102
BB0490		putative membrane protein		Cell envelope	-3.32789	0.0175	-3.41618	NA
BB0491	virB5	plasmid-related exported protein		Periplasmic/ Exported/ Lipoprotein	-1.08476	0.178618	-2.16682	0.0148492
BB0492		hypothetical protein		Unknown proteins, no known homologs	NA	NA	-3	NA
BB0493	virD2	plasmid-related protein			1.00975	0.0366842	-1.61918	0.18809
BB0494		hypothetical 20.3 kDa protein, plasmid-related protein	DNA binding	regulation of transcription, DNA-dependent	-1.4951	0.175269	NA	NA
BB0495		hypothetical protein		Unknown proteins, no known homologs	-1.17015	0.034	NA	NA
BB0496		hypothetical protein	hydrolase activity		1.2871	0.100461	1.16117	0.130815
BB0497		hypothetical protein	ATP-binding cassette (ABC) transporter activity	transport	-1.46097	0.0228126	NA	NA
BB0498		hypothetical protein		Unknown proteins, no known homologs	-1.73685	0.0359035	-1.05536	NA
BB0499		hypothetical protein		Unknown proteins, no known homologs	1.08349	0.0493212	-1.14313	0.0494975
BB0500		putative integrase			-1.0633	0.073435	-1.27508	0.0212132
BB0501	htpG	heat shock protein	heat shock protein activity	protein folding	1.14964	0.074744	1.04399	0.193747
BB0502		probable glutathione S-transferase	transferase activity		-1.14659	0.089787	-1.21231	0.0565685
BB0503	ampD	N-acetylmuramoyl-L-alanine amidase	N-acetylmuramoyl-L-alanine amidase activity	peptidoglycan catabolism	1.02497	0.102426	-1.6326	0.0523259
BB0504		putative exported protein		Periplasmic/ Exported/ Lipoprotein	1.12948	0.08832	1.04822	0.0254558
BB0505		putative membrane protein		cytochrome c oxidase biogenesis	-1.05132	0.0917625	-1.4038	NA
BB0506	ffh	signal recognition particle protein	RNA binding	SRP-dependent cotranslational membrane targeting	-1.14757	0.0928491	-1.4962	NA
BB0507		putative membrane protein		cell wall catabolism	-1.61398	0.0672525	-1.04233	0.11738
BB0508		conserved hypothetical protein		sulfur metabolism	1.07576	0.0394138	-1.00297	0.0544472
BB0509		prolyl iminopeptidase	prolyl aminopeptidase activity		-1.10984	0.0844393	-1.50862	0.0799031
BB0510		putative methyltransferase	S-adenosylmethionine-dependent methyltransferase activity		-1.37741	0.092976	-1.93295	0.0487904
BB0511		LysR family regulatoy protein	transcription factor activity	Global Regulatory Functions	-1.50637	0.0864116	-2.6532	0.0558614
BB0512		conserved hypothetical protein		metabolism	-1.87629	0.0823648	NA	NA
BB0513		putative hydroxymethylglutaryl-CoA lyase(pseudogene)			-1.37192	0.085415	-3.1689	NA
BB0514		putative exported protein		Periplasmic/ Exported/ Lipoprotein	2.07129	0.292238	-1.65084	0.0254558	positive	2.59299	0	0
BB0515		conserved hypothetical protein		Conserved in organism other than E. coli	-1.90232	0.178905	-3.51786	NA	negative	-1.37683	0	7.73057
BB0516		putative transcriptional regulator	DNA binding	regulation of transcription, DNA-dependent	-1.03242	0.114434	-1.77477	0.0678823
BB0517		putative dioxygenase subunit	iron ion binding	electron transport	1.26373	0.0934938	1.17893	0.00919239
BB0518		putative hydroxylase	catalytic activity	electron transport	1.06891	0.13397	-3	0.0919239
BB0519		putative exported protein		transport	-1.10546	0.175306	-2.73611	0.00848528
BB0520		putative membrane protein		Cell envelope	1.34975	0.0373985	1.46108	0.00989949
BB0521		integral membrane protein			-1.04706	0.2555	NA	NA
BB0522		oxidoreductase	electron transporter activity	electron transport	-1.04682	0.0675381	-2.66216	NA
BB0523		putative ferredoxin	oxidoreductase activity	metabolism	1.1132	0.0951486	-4.84426	0.101823
BB0524		conserved hypothetical protein	hydrolase activity, acting on glycosyl bonds	Conserved in organism other than E. coli	1.03289	0.0364707	1.07318	0.0685894
BB0525		conserved hypothetical protein		Conserved in organism other than E. coli	-1.58579	0.0740322	-2.15301	NA
BB0526		putative phage-related protein		Laterally acquired elements	-1.27283	0.112354	-2.73295	0.0318198
BB0527		conserved hypothetical protein		Conserved in organism other than E. coli	-1.14424	0.0835483	-1.74208	0.0445477
BB0528		putative DNA-binding protein	DNA binding		-1.00629	0.0695066	-1.14925	0.0318198
BB0529		hypothetical protein		Unknown proteins, no known homologs	1.12085	0.0580255	-1.11299	0.0367696
BB0530		regulatory protein	transcription factor activity	Global Regulatory Functions	-1.16791	0.0275408	-1.4512	0.053033
BB0531		putative exported protein		Periplasmic/ Exported/ Lipoprotein	1.10984	0.0363175	-1.10313	0.106773
BB0532		putative acyl-CoA synthetase			1.23114	0.0716741	1.12352	0.268701
BB0533		enoyl-CoA hydratase	isomerase activity	metabolism	-1.10328	0.13027	-3.03856	NA
BB0534		putative exported protein		Periplasmic/ Exported/ Lipoprotein	1.02188	0.0523359	-1.02827	0.053033
BB0535		hypothetical protein		Unknown proteins, no known homologs	1.09272	0.114824	1.4154	0.166877
BB0536		conserved hypothetical protein		Conserved in organism other than E. coli	-1.73797	0.0567672	-2.38547	0.0855599
BB0537		putative sulfurtransferase	transferase activity	metabolism	-1.50955	0.041182	-1.18141	0.0289914
BB0538		LysR family regulatory protein	transcription factor activity	Global Regulatory Functions	-1.18551	0.130662	-4.24417	0.026163
BB0539		thiamine pyrophosphate enzyme		metabolism	-1.7207	0.134774	-3.95318	NA
BB0540		conserved hypothetical protein		metabolism	-1.45244	0.105394	-3.59817	0.0120208
BB0541		enoyl-CoA hydratase	isomerase activity	metabolism	-1.27762	0.0523203	NA	NA
BB0542		putative exported protein		Periplasmic/ Exported/ Lipoprotein	-1.319	0.0828631	-2.19907	0.108187
BB0543		putative transcriptional regulator	DNA binding	regulation of transcription, DNA-dependent	-1.88049	0.10831	-4.1113	0.0190919
BB0544		putative exported protein		Periplasmic/ Exported/ Lipoprotein	-1.32087	0.149033	-3.67652	0.0643467
BB0545		conserved hypothetical protein		Conserved in organism other than E. coli	-1.18836	0.0707162	-6.18848	NA
BB0546		conserved hypothetical protein		Conserved in organism other than E. coli	1.00923	0.0713122	1.29526	0.0410122
BB0547		putative ligase	ligase activity	metabolism	-1.20197	0.0420568	-1.13818	0.143543
BB0548		LacI family regulatory protein	transcription factor activity	Global Regulatory Functions	-1.24219	0.098362	-4.59922	NA
BB0549		putative membrane protein		Cell envelope	-1.70706	0.0734697	-4.02726	0.053033
BB0550		hypothetical protein		Unknown proteins, no known homologs	-3.52703	0.0445	-4.26715	0.0622254
BB0551		conserved hypothetical protein		Conserved in organism other than E. coli	-1.37797	0.0898067	-2.96241	0.0905097
BB0552		putative Zinc-binding dehydrogenase	alcohol dehydrogenase activity, zinc-dependent		1.07189	0.0672085	-1.28969	0.0516188
BB0553		conserved hypothetical protein	catalytic activity	metabolism	1.06474	0.0511668	-1.12518	0.0714178
BB0554		putative carboxymuconolactone decarboxylase	catalytic activity	aromatic compound metabolism	1.21581	0.137319	1.20431	0.129401
BB0555		enoyl-CoA hydratase	isomerase activity	metabolism	1.19869	0.215183	1.36971	0.0480833
BB0556		iron-containing alcohol dehydrogenase	iron ion binding	metabolism	1.19333	0.143851	1.21912	0.0452548
BB0557		CaiB		metabolism	-1.27908	0.0055	-1.61807	0.119501
BB0558		putative racemase		metabolism	-1.15486	0.0957903	-1.03639	0.119501
BB0559		putative exported protein		Periplasmic/ Exported/ Lipoprotein	-1.56292	0.0525	NA	NA
BB0560		LysR family regulatory protein	transcription factor activity	Global Regulatory Functions	-1.19237	0.0544337	-1.36411	0.0544472
BB0561		conserved hypothetical protein		Conserved in organism other than E. coli	-1.66518	0.1745	-3.51263	0.0120208
BB0562		putative exported protein		Periplasmic/ Exported/ Lipoprotein	-1.19322	0.0776236	NA	NA
BB0563		acyl-CoA dehydrogenase	acyl-CoA dehydrogenase activity	electron transport	-1.16852	0.10088	NA	NA
BB0564		putative exported protein		Periplasmic/ Exported/ Lipoprotein	-2.15215	0.165144	-4.41045	NA	negative	-1.44312	0	6.40485
BB0565		conserved hypothetical protein		Conserved in organism other than E. coli	1.1655	0.131394	1.07022	0.0523259
BB0566		aconitase family protein	lyase activity	metabolism	-1.04462	0.0491803	NA	NA
BB0567		LysR family regulatory protein	transcription factor activity	Global Regulatory Functions	-1.40647	0.129323	-3.31092	NA
BB0568		putative exported protein		Periplasmic/ Exported/ Lipoprotein	-1.18084	0.10487	-1.50958	0.239002
BB0569		putative membrane protein		Cell envelope	1.02024	0.1125	-5.16157	NA
BB0570		putative hydrolase	hydrolase activity		-1.5293	0.00490535	-3.22071	NA
BB0571		putative branched-chain amino acid transportATP-binding protein	ATP-binding cassette (ABC) transporter activity	transport	NA	NA	NA	NA
BB0572		ABC transporter ATP-binding protein	ATP-binding cassette (ABC) transporter activity	transport	-1.4086	0.041827	-2.62084	NA
BB0573		putative branched-chain amino acid transportsystem permease	transporter activity	transport	-1.05322	0.0504981	NA	NA
BB0574		putative branched-chain amino acid transportsystem permease protein	transporter activity	transport	NA	NA	NA	NA
BB0575					-1.41482	0.0285	NA	NA
BB0576		TetR family regulatory protein	transcription factor activity	Global Regulatory Functions	-1.16751	0.061232	-2.03969	0.0784889
BB0577		hypothetical protein		Unknown proteins, no known homologs	-1.48061	0.231966	NA	NA
BB0578		conserved hypothetical protein		Conserved in organism other than E. coli	1.04882	0.101287	-1.25411	0.119501
BB0579		conserved hypothetical protein	racemase and epimerase activity, acting on amino acids and derivatives	metabolism	-1.94483	0.135289	-1.79909	NA	negative	-1.51545	0	5.1005
BB0580		short chain dehydrogenase	oxidoreductase activity	metabolism	1.13186	0.173063	1.2225	0.118794
BB0581		acyl-CoA dehydrogenase	acyl-CoA dehydrogenase activity	metabolism	-1.06246	0.116437	-1.47473	0.253851
BB0582		short chain dehydrogenase	oxidoreductase activity	metabolism	1.07025	0.0620095	-1.11985	0.147785
BB0583		putative ligase	ligase activity	metabolism	-1.23398	0.163415	-1.37762	0.135765
BB0584		hypothetical protein		Unknown proteins, no known homologs	-1.05001	0.0741794	-1.46559	0.190212
BB0585		enoyl-CoA hydratase	isomerase activity	metabolism	1.04346	0.0791921	-1.03186	0.0219203
BB0586		putative exported protein		Periplasmic/ Exported/ Lipoprotein	-2.25168	0.225876	-5.73786	NA	negative	-1.52911	0	4.87035
BB0587		conserved hypothetical protein		Conserved in organism other than E. coli	-1.21633	0.112187	-1.86288	0.108187
BB0588		conserved hypothetical protein		Conserved in organism other than E. coli	-1.56292	0.4395	-5.07296	NA
BB0589		conserved hypothetical protein	citrate (pro-3S)-lyase activity	Conserved in organism other than E. coli	1.0698	0.116	NA	NA
BB0590		conserved hypothetical protein	oxidoreductase activity	metabolism	1.08885	0.0619961	-1.72303	0.165463
BB0591		acyl-CoA dehydrogenase	acyl-CoA dehydrogenase activity	metabolism	1.41688	0.020581	1.20305	0.192333
BB0592		CaiB		metabolism	1.47611	0.171525	1.50423	0.0608112
BB0593		CaiB		metabolism	1.16892	0.0553158	-1.50765	0.0579828
BB0594		putative exported protein		Periplasmic/ Exported/ Lipoprotein	-1.22834	0.0810768	-1.96346	NA
BB0595		hypothetical protein		Unknown proteins, no known homologs	-1.64742	0.162603	-2.45228	NA
BB0596		nitroreductase family protein	oxidoreductase activity	electron transport	-1.37234	0.0332039	-1.81288	0.066468
BB0597		enoyl-CoA hydratase	isomerase activity	metabolism	-1.12152	0.0944691	-1.64739	0.0205061
BB0598		extracellular ligand binding protein			1.10835	0.0460966	1.18866	0.113137
BB0599		putative branched-chain amino acid transportsystem permease protein	transporter activity	transport	-1.11139	0.145784	-3.77636	NA
BB0600	cysH	phosphoadenosine phosphosulfate reductase	phosphoadenylyl-sulfate reductase (thioredoxin) activity	sulfate assimilation, phosphoadenylyl sulfate reduction by phosphoadenylyl-sulfate reductase (thioredoxin)	-1.41991	0.207415	-2.87242	0.231224
BB0601		ABC transport system ATP-binding protein	ATP-binding cassette (ABC) transporter activity	transport	-1.09359	0.164002	NA	NA
BB0602		ABC transport system ATP-binding protein	ATP-binding cassette (ABC) transporter activity	transport	-1.10911	0.128029	-1.96509	0.0869741
BB0603		NADH:flavin oxidoreductase	oxidoreductase activity	metabolism	-1.00931	0.145132	1.03426	0.171827
BB0604		short chain dehydrogenase	oxidoreductase activity	metabolism	-1.21063	0.176077	-2.13743	NA
BB0605		putative exported protein		Periplasmic/ Exported/ Lipoprotein	-1.15328	0.146563	-4.31387	NA
BB0606		acetyl-CoA hydrolase	acetyl-CoA metabolism	metabolism	-1.00119	0.0198137	-1.00596	0.106066
BB0607		AMP-binding enzyme	catalytic activity	metabolism	1.1597	0.0796483	1.08376	0.0749533
BB0608		IclR family regulatory protein	DNA binding	regulation of transcription, DNA-dependent	-1.60435	0.0944313	-1.67422	0.0339411
BB0609		IclR family regulatory protein	DNA binding	regulation of transcription, DNA-dependent	-1.26335	0.135717	-3.51786	NA
BB0610		putative pyruvate carboxylase	gluconeogenesis	metabolism	-1.38279	0.125553	-3.37233	0.0219203
BB0611		acyl-CoA dehydrogenase	acyl-CoA dehydrogenase activity	electron transport	1.70204	0.0658331	-1.88067	0.072832
BB0612		putative enoyl-CoA hydratase	oxidoreductase activity	metabolism	1.05968	0.0823552	1.04611	0.136472
BB0613		putative short chain dehydrogenase	oxidoreductase activity	metabolism	1.0634	0.0878413	-1.03186	0.0205061
BB0614		putative thiolase			-1.03768	0.0462244	1.07826	0.0601041
BB0615		AMP-binding enzyme	catalytic activity	metabolism	-1.37741	0.1608	-3.58182	0.00282843
BB0616		IclR family regulatory protein	DNA binding	regulation of transcription, DNA-dependent	1.12249	0.0817733	-1.24815	0.0975807
BB0617		CaiB		metabolism	1.00283	0.0443152	-3.38197	0.0346482
BB0618		LysR family regulatory protein	transcription factor activity	Global Regulatory Functions	-1.19195	0.0611718	-1.27028	0.0601041
BB0619		putative acyl-CoA dehydrogenase	acyl-CoA dehydrogenase activity	electron transport	-1.07007	0.0912684	-2.33136	0.0721249
BB0620	etfB, etfS	electron transfer flavoprotein beta-subunit	electron transporter activity	electron transport	-1.4033	0.0642225	-2.01363	0.0579828
BB0621	etfA, etfL	electron transfer flavoprotein alpha-subunit	electron transporter activity	electron transport	-1.07625	0.0542278	-1.1284	0.214253
BB0622		conserved hypothetical protein		Conserved in organism other than E. coli	-1.49145	0.135037	-3.60366	0.0424264
BB0623		LysR-family transcriptional regulator	transcription factor activity	Global Regulatory Functions	1.1088	0.100744	-1.27028	0.180312
BB0624		conserved hypothetical protein		Conserved in organism other than E. coli	-1.04706	0.156568	-2.45483	0.0643467
BB0625		putative exported protein		Periplasmic/ Exported/ Lipoprotein	-1.22008	0.174011	-3.35795	0.0622254
BB0626		putative exported protein		Periplasmic/ Exported/ Lipoprotein	1.06221	0.114467	-2.13357	0.0268701
BB0627		conserved hypothetical protein	transcription factor activity	Global Regulatory Functions	1.41241	0.164766	1.4154	0.0707107
BB0628		conserved hypothetical protein		Conserved in organism other than E. coli	-1.91834	0.166253	-7.03571	0.039598	negative	-1.39208	0	7.41441
BB0629		putative enoyl-CoA hydratase	catalytic activity	metabolism	-1.22053	0.0543947	-1.23511	0.0509117
BB0630		nitroreductase family protein	oxidoreductase activity	electron transport	-1.29386	0.142337	-1.81846	0.0226274
BB0631		TetR family transcriptional regulator	transcription factor activity	Global Regulatory Functions	-1.51227	0.0334512	-1.34701	0.0275772
BB0632		putative hydroxymethylglutaryl-CoA lyase	lyase activity		-1.52524	0.129755	NA	NA
BB0633		putative enoyl-CoA hydratase	isomerase activity	metabolism	-1.20724	0.126643	-4.47727	0.0268701
BB0634		CAIB		metabolism	-1.22031	0.345671	-3.62021	0.0572756
BB0635		putative lipoprotein		Periplasmic/ Exported/ Lipoprotein	-1.10328	0.0897482	-1.55016	0.103945
BB0636		iron-containing alcohol dehydrogenase	iron ion binding	metabolism	-1.14894	0.1028	-1.76155	0.00282843
BB0637		enoyl-CoA hydratase	isomerase activity	metabolism	-1.11058	0.123801	NA	NA
BB0638		putative amidase	amidase activity		-1.67941	0.0953139	-1.88217	NA
BB0639		conserved hypothetical protein		Conserved in organism other than E. coli	-1.0759	0.0239631	-1.11247	0.0487904
BB0640		hypothetical protein		Unknown proteins, no known homologs	-1.24242	0.131467	-3.80064	0.128693
BB0641		putative aldehyde dehydrogenase	oxidoreductase activity	metabolism	-1.47492	0.0288773	-3.11053	NA
BB0642		NADPH-dependent FMN reductase		metabolism	-1.61709	0.12104	-1.93295	0.072832
BB0643		putative transport system permease protein	transporter activity	transport	-1.12095	0.0470319	NA	NA
BB0644		ABC transporter ATP-binding protein	ATP-binding cassette (ABC) transporter activity	transport	-1.72858	0.0987591	-3.54955	NA
BB0645		putative exported protein		Periplasmic/ Exported/ Lipoprotein	-1.08266	0.119967	-2.67421	0.100409
BB0646		luciferase-like monooxygenase	monooxygenase activity		-1.28964	0.152272	-3.19459	0.0452548
BB0647		IclR family transcriptional regulator	DNA binding	regulation of transcription, DNA-dependent	-1.09644	0.0538453	-1.50191	0.0890955
BB0648		probable regulator	transcription factor activity	Global Regulatory Functions	-1.18292	0.0920339	-2.33136	NA
BB0649		probable short chain dehydrogenase	oxidoreductase activity	metabolism	-1.14356	0.0626942	-2.86199	NA
BB0650		putative exported protein		Periplasmic/ Exported/ Lipoprotein	1.04956	0.132932	1.10152	0.039598
BB0651		aldehyde dehydrogenase	aldehyde dehydrogenase (NAD) activity	metabolism	1.01191	0.0783519	1.11548	0.135057
BB0652		putative exported protein		Periplasmic/ Exported/ Lipoprotein	-1.15032	0.0148565	-1.89727	0.0424264
BB0653		putative 3-hydroxyisobutyrate dehydrogenase	phosphogluconate dehydrogenase (decarboxylating) activity	metabolism	-1.22386	0.061	-3.41126	0.140714
BB0654		LysR-family transcriptional regulator	transcription factor activity	Global Regulatory Functions	-1.67015	0.2555	-4.06885	0.120915
BB0655		putative transcriptional regulator	DNA binding	regulation of transcription, DNA-dependent	-1.22957	0.0415559	NA	NA
BB0656		probable acyl-CoA dehydrogenase	acyl-CoA dehydrogenase activity	electron transport	-2.35754	0.213	-4.54615	NA
BB0657		putative acetyl-CoA synthetase	catalytic activity	metabolism	1.01548	0.0407115	-1.34624	0.0339411
BB0658		conserved hypothetical protein		Conserved in organism other than E. coli	-1.78602	NA	-4.04795	NA
BB0659		conserved hypothetical protein		Conserved in organism other than E. coli	1.04197	0.0229222	-1.88818	NA
BB0660		putative exported protein		Periplasmic/ Exported/ Lipoprotein	1.11817	0.148234	-1.03277	0.0289914
BB0661		putative enoyl-CoA hydratase	isomerase activity	metabolism	-1.06549	0.0572649	-2.39271	NA
BB0662		conserved hypothetical protein		Conserved in organism other than E. coli	-1.70533	0.135841	-3.03077	0.0311127
BB0663	gcdH	glutaryl-CoA dehydrogenase	glutaryl-CoA dehydrogenase activity	electron transport	-1.5463	0.153616	-4.2518	NA
BB0664		probable enoyl CoA hydratase	catalytic activity	metabolism	-1.04755	0.0870536	1.1286	0.207889
BB0665		probable thiolase			-1.25612	0.0975	NA	NA
BB0666		putative exported protein		Periplasmic/ Exported/ Lipoprotein	-1.57945	0.157121	NA	NA
BB0667		putative acetyl-CoA synthetase			NA	NA	NA	NA
BB0668		conserved hypothetical protein		Conserved in organism other than E. coli	-1.63958	0.0502106	-3.85016	0.0523259
BB0669		LysR-family transcriptional regulator	transcription factor activity	regulation of transcription, DNA-dependent	-1.30213	NA	-3.18598	0.0890955
BB0670		putative hydrolase	hydrolase activity		-1.13	0.0232773	NA	NA
BB0671		conserved hypothetical protein		Conserved in organism other than E. coli	-1.16893	0.0423379	NA	NA
BB0672		conserved hypothetical protein		Conserved in organism other than E. coli	-1.48126	0.0823754	NA	NA
BB0673	gst	glutathione S-transferase	glutathione transferase activity		-1.32316	0.017817	NA	NA
BB0674		putative exported protein		Periplasmic/ Exported/ Lipoprotein	1.07962	0.135085	-1.07065	0.106066
BB0675		putative exported protein		Periplasmic/ Exported/ Lipoprotein	1.17711	0.228039	1.10829	0.185262
BB0676		putative GntR-family transcriptional regulator	transcription factor activity	Global Regulatory Functions	1.13053	0.127221	1.25973	0.0820244
BB0677		probable aldehyde dehydrogenase	oxidoreductase activity	metabolism	-1.46129	0.176314	-4.04795	NA
BB0678	metC	cystathionine beta-lyase	amino acid metabolism	metabolism	-1.13862	0.107243	-1.27784	0.0749533
BB0679		conserved hypothetical protein		Conserved in organism other than E. coli	-1.0078	0.0461284	1.00931	0.0551543
BB0680		putative exported protein		Periplasmic/ Exported/ Lipoprotein	-1.11205	0.117545	-1.51151	0.128693
BB0681		conserved hypothetical protein		Conserved in organism other than E. coli	-1.43605	0.124383	NA	NA
BB0682		conserved hypothetical protein		Conserved in organism other than E. coli	-1.28127	0.10829	-1.50765	0.103238
BB0683		conserved hypothetical protein		Conserved in organism other than E. coli	-1.10838	0.100925	-1.18556	0.0141421
BB0684		hypothetical protein		Unknown proteins, no known homologs	1.06549	0.0368677	-1.02293	0.0148492
BB0685		transcriptional regulator	DNA binding	regulation of transcription, DNA-dependent	-1.00659	0.0513103	-3.74051	NA
BB0686	dapA	dihydrodipicolinate synthase	dihydrodipicolinate synthase activity		1.21253	0.0544741	1.01015	0.165463
BB0687	aatB	aspartate aminotransferase	aspartate transaminase activity	biosynthesis	1.21506	0.108585	-1.18082	NA
BB0688		probable solute-binding periplasmic protein	transporter activity	transport	-1.01228	0.209407	-3.10644	0.0544472
BB0689		putative permease component of ABC transporter	transporter activity	transport	-1.03229	0.127306	-1.26688	0.10748
BB0690		putative ATP-binding component of ABCtransporter	ATP-binding cassette (ABC) transporter activity	transport	1.02753	0.117532	-1.47198	NA
BB0691		putative peptidase	metallopeptidase activity	proteolysis and peptidolysis	1.05031	0.180031	1.24408	0.133643
BB0692		probable transcriptional regulator	DNA binding	regulation of transcription, DNA-dependent	-1.00931	0.0505	NA	NA
BB0693	amaB	N-carbamoyl-L-amino acid amidohydrolase	metallopeptidase activity	proteolysis and peptidolysis	1.01957	0.0621602	-2.99241	NA
BB0694		probable amidase	amidase activity		1.03297	0.105301	NA	NA
BB0695		putative polysaccharide deacetylase	hydrolase activity, acting on carbon-nitrogen (but not peptide) bonds	carbohydrate metabolism	-1.21986	0.320017	NA	NA
BB0696	allA, glxA2	putative ureidoglycolate hydrolase	ureidoglycolate hydrolase activity	allantoin catabolism	1.30756	0.127766	-3.78846	NA
BB0697		putative membrane protein		Cell envelope	1.18187	0.0541164	-1.24029	NA
BB0698		putative membrane protein		Cell envelope	1.21298	0.0466895	1.14594	0.1492
BB0699		putative extracellular solute-binding protein		transport	-1.16558	0.078467	NA	NA
BB0700		putative LysR-family transcriptional regulator	transcription factor activity	Global Regulatory Functions	1.38663	0.166079	-1.45477	0.280721
BB0701		putative exported protein		Periplasmic/ Exported/ Lipoprotein	1.14504	0.0820563	-1.41897	0.0692965
BB0702		putative GntR-family transcriptional regulator	transcription factor activity	Global Regulatory Functions	-1.80279	0.0985398	-2.64134	0.133643
BB0703		conserved hypothetical protein		Conserved in organism other than E. coli	-1.03449	0.076749	-1.69462	0.174655
BB0704		putative membrane protein		Cell envelope	1.04004	0.0773648	-1.10571	0.110309
BB0705		putative membrane protein		Cell envelope	1.0189	0.118925	-2.55292	NA
BB0706		extracellular solute-binding protein		transport	-1.17919	0.128113	-2.28185	0.0509117
BB0707		probable GntR-family transcriptional regulator	transcription factor activity	Global Regulatory Functions	-1.2879	0.117031	-3.46628	0.128693
BB0708	glyA	serine hydroxymethyltransferase	glycine hydroxymethyltransferase activity	glycine metabolism	-1.49311	0.095888	-3.58725	0.108187
BB0709	benE	benzoate membrane transport protein			-1.20122	0.0471812	-2.38306	NA
BB0710		probable oxidoreductase	electron transporter activity	electron transport	-1.10093	0.0697555	1.5313	0.403051
BB0711		putative aldehyde dehydrogenase	oxidoreductase activity	electron transport	-1.0759	0.0972726	-1.56246	0.1492
BB0712		putative LysR-family transcriptional regulator	transcription factor activity	Global Regulatory Functions	1.23634	0.0389502	1.14932	0.00636396
BB0713		putative transcriptional regulator	DNA binding	regulation of transcription, DNA-dependent	-1.10084	0.0641488	NA	NA
BB0714	hmgL	3-hydroxy-3-methylglutaryl-CoA lyase	hydroxymethylglutaryl-CoA lyase activity		-1.35902	0.078	-2.19295	NA
BB0715		conserved hypothetical protein		metabolism	1.3179	0.0611018	-1.14093	0.019799
BB0716		putative isochorismatase	catalytic activity	metabolism	1.03751	0.105242	-1.0849	0.10253
BB0717		putative exported protein		Periplasmic/ Exported/ Lipoprotein	-1.14874	0.0908814	1.03299	0.0113137
BB0718	bcpA	carboxyvinyl-carboxyphosphonatephosphorylmutase	carboxyvinyl-carboxyphosphonate phosphorylmutase activity	metabolism	-1.38593	0.240645	-2.96985	0.0169706
BB0719		putative ABC transporter periplasmicsolute-binding protein		transport	NA	NA	-3.21196	0.0282843
BB0720		putative membrane protein		Cell envelope	1.32177	0.0367609	-1.01897	0.0240416
BB0721		putative membrane protein		Cell envelope	-1.32095	0.24863	-1.67898	NA
BB0722		conserved hypothetical protein		Conserved in organism other than E. coli	-1.05371	0.149428	NA	NA
BB0723		conserved hypothetical protein		Conserved in organism other than E. coli	1.23456	0.1375	-1.6326	0.00989949
BB0724		conserved hypothetical protein		Conserved in organism other than E. coli	-1.10328	0.190952	-3.19892	0.103945
BB0725		putative transcriptional regulator	DNA binding	Global Regulatory Functions	-1.01818	0.0624037	1.18063	0.180312
BB0726		putative exported protein		Periplasmic/ Exported/ Lipoprotein	-1.67389	0.110809	-2.02224	0.167584
BB0727		electron transfer component of a dioxygenasesystem	electron transporter activity	electron transport	-1.31668	0.0535	-1.49242	0.0735391
BB0728	hcaE	hydroxylating alpha subunit of a dioxygenasesystem	iron ion binding	electron transport	-1.09128	0.0470442	1.04103	0.00494975
BB0729		putative short chain dehydrogenase	oxidoreductase activity	metabolism	-1.23967	0.0883107	-5.07296	0.101823
BB0730		hydroxylating beta subunit of a dioxygenasesystem	oxidoreductase activity, acting on single donors with incorporation of molecular oxygen, incorporation of two atoms of oxygen	electron transport	-1.28716	0.134898	-3.05821	0.0586899
BB0731		hypothetical protein		Unknown proteins, no known homologs	1.13395	0.0880963	1.0698	0.125158
BB0732	cadA	FAD-monooxygenase	monooxygenase activity	electron transport	1.00819	0.0833337	-4.52874	NA
BB0733		putative exported protein		Periplasmic/ Exported/ Lipoprotein	-1.1462	0.071516	-1.43447	NA
BB0734	hpaG	putative fumarylacetoacetate hydrolase familyprotein	hydrolase activity	metabolism	-1.18878	0.0542617	-3.07812	0.0523259
BB0735		putative fumarylacetoacetate hydrolase familyprotein	hydrolase activity	metabolism	1.02858	0.030026	-1.25544	0.00494975
BB0736	hpaE	5-carboxymethyl-2-hydroxymuconate semialdehydedehydrogenase	oxidoreductase activity	metabolism	-1.22431	0.0568118	-1.03684	0.135765
BB0737	hpaD	homoprotocatechuate 2,3-dioxygenase	3,4-dihydroxyphenylacetate 2,3-dioxygenase activity	electron transport	-1.13573	NA	NA	NA
BB0738	hpaF	5-carboxymethyl-2-hydroxymuconatedelta-isomerase	5-carboxymethyl-2-hydroxymuconate delta-isomerase activity	aromatic compound metabolism	-1.30365	0.0869437	-2.87242	0.130815
BB0739	hpcG	2-oxo-hepta-3-ene-1,7-dioic acid hydratase	lyase activity	aromatic compound metabolism	-1.56227	0.0554269	-2.41718	NA
BB0740	hpaI, hpcH	2,4-dihydroxyhept-2-ene-1,7-dioic acid aldolase	aldolase activity	metabolism	-1.26226	0.0501447	-1.00596	0.104652
BB0741		LysR-family transcriptional regulator	transcription factor activity	Global Regulatory Functions	-1.57723	0.106483	-3.19892	0.000707107
BB0742		putative exported protein		Periplasmic/ Exported/ Lipoprotein	-1.01865	0.0735439	-1.18913	0.210718
BB0743		Thiamine pyrophosphate enzyme		metabolism	-1.46799	0.126734	-2.87591	NA
BB0744		putative aldehyde dehydrogenase	oxidoreductase activity	metabolism	-1.11021	0.101996	-1.47015	0.118794
BB0745		putative lipase	catalytic activity		-1.18647	0.0312329	-1.62474	0.00353553
BB0746		putative transcriptional regulator	DNA binding		-1.38422	0.078867	-2.41965	0.187383
BB0747		putative exported protei		Periplasmic/ Exported/ Lipoprotein	-1.353	0.121346	-3.62577	0.10748
BB0748		putative exported protein		Periplasmic/ Exported/ Lipoprotein	-1.55929	0.0403992	-1.7655	0.0671751
BB0749		putative lipoprotein		Periplasmic/ Exported/ Lipoprotein	-2.09315	0.065	-5.16157	NA
BB0750		probable enoyl-CoA hydratase	enoyl-CoA hydratase activity	metabolism	-1.71359	0.0192376	-2.69555	0.00353553
BB0751		probable short-chain dehydrogenase	oxidoreductase activity	metabolism	-1.29348	0.0837977	NA	NA
BB0752		conserved hypothetical protein		metabolism	-1.77301	0.0911837	-5.24169	0.0572756
BB0753		coenzyme A ligase	ligase activity	metabolism	-1.55966	0.121863	-5.39726	NA
BB0754		TetR-family transcriptional regulator	transcription factor activity	Global Regulatory Functions	1.12963	0.0580569	-1.09293	0.0304056
BB0755		putative acyl-CoA dehyrdogenase	acyl-CoA dehydrogenase activity	electron transport	1.07724	0.0439687	1.00042	0.0148492
BB0756		branched-chain amino acid ABC transporter,permease protein	transporter activity	transport	-1.31652	0.101115	-3.56024	0.0622254
BB0757		branched-chain amino acid ABC transporter,permease protein	transporter activity	transport	-1.05665	0.0696142	-1.38732	0.0268701
BB0758		branched-chain amino acid ABC transporter,ATP-binding protein	ATP-binding cassette (ABC) transporter activity	transport	-1.33791	0.103591	NA	NA
BB0759		putative ABC transporter ATP-binding protein	ATP-binding cassette (ABC) transporter activity	transport	1.25153	0.212989	1.28342	0.0410122
BB0761		branched-chain amino acid ABC transporter,binding protein		transport	-1.35491	0.0911576	-1.58764	0.0827315
BB0762		short chain dehydrogenase	3-hydroxyacyl-CoA dehydrogenase activity	metabolism	-1.34676	0.0517505	1.09772	0.116673
BB0763		enoyl CoA dehydratase	lyase activity	metabolism	-1.60243	0.0805073	-1.37602	0.0452548
BB0764		conserved hypothetical protein		Conserved in organism other than E. coli	-1.29535	0.0686786	NA	NA
BB0765		putative thiolase			-1.29192	0.134292	-1.88818	0.108894
BB0766		putative hydratase	oxidoreductase activity	metabolism	-1.23738	0.0344054	-1.32586	0.0459619
BB0767		hypothetical protein Xcc2124		Unknown proteins, no known homologs	-1.18176	0.108148	-2.24501	0.0346482
BB0768		putative exported protein		Periplasmic/ Exported/ Lipoprotein	-1.2852	0.0900821	NA	NA
BB0769		conserved hypothetical protein		Conserved in organism other than E. coli	-3.61042	0.0182819	1.07741	0.215668	negative	-4.81194	0	0.0731099
BB0770		probable transcriptional regulator	DNA binding	regulation of transcription, DNA-dependent	-1.18979	0.0995929	-3.1689	NA
BB0771		putative FAD dependent oxidoreductase	oxidoreductase activity	electron transport	-1.25214	0.0778227	-3.11462	0.0190919
BB0772		putative dipeptidase	membrane dipeptidase activity	proteolysis and peptidolysis	1.01756	0.0980088	1.00296	0.119501
BB0773		putative exported protein		Periplasmic/ Exported/ Lipoprotein	-1.06736	0.0483973	-1.22234	0.0424264
BB0774		hypothetical protein		Unknown proteins, no known homologs	-1.12133	0.120891	-1.37123	0.0890955
BB0775		putative transcriptional regulator	transcription factor activity	Global Regulatory Functions	1.12427	0.0353011	NA	NA
BB0776		hypothetical protein		Unknown proteins, no known homologs	1.2426	0.0907602	1.01777	0.217789
BB0777		hypothetical protein		Unknown proteins, no known homologs	NA	NA	NA	NA
BB0778		putative membrane protein		Cell envelope	1.3339	0.0445466	-2.52026	NA
BB0779		putative membrane protein		Cell envelope	-1.01618	0.183464	-2.53105	NA
BB0780		putative type II secretion system protein		protein secretion	-1.68269	0.4535	NA	NA
BB0781		putative type II secretion system protein	ATP binding	transport	1.09228	0.114507	NA	NA
BB0782		putative type II secretion system protein	nucleotide binding	peptidoglycan metabolism	1.17145	0.0690803	-1.12894	NA
BB0783		putative membrane protein		Cell envelope	1.0701	0.0756755	NA	NA
BB0784		putative type II secretion system protein		protein secretion	-1.0505	0.0392726	-2.89706	NA
BB0785		putative membrane protein		Cell envelope	1.21067	0.102944	NA	NA
BB0786		putative exported protein		Periplasmic/ Exported/ Lipoprotein	1.15776	0.0459139	-1.7855	0.141421
BB0787		putative exported protein		Periplasmic/ Exported/ Lipoprotein	-1.09573	0.130503	NA	NA
BB0788		hypothetical protein		Unknown proteins, no known homologs	1.08722	0.052519	NA	NA
BB0789		putative exported protein		Periplasmic/ Exported/ Lipoprotein	NA	NA	-2.68636	NA
BB0790		putative type II secretion system protein			1.03364	0.0737275	NA	NA
BB0791	pilT	twitching mobility protein	ATP binding	transport	-1.14649	0.240382	NA	NA
BB0792	gspO	type 4 prepilin-like proteins leader peptideprocessing enzyme	cysteine-type peptidase activity	proteolysis and peptidolysis	-1.09234	0.179383	NA	NA
BB0793	vrgS	conserved hypothetical protein		Conserved in organism other than E. coli	-1.24703	0.215454	NA	NA
BB0794		putative exported protein		Periplasmic/ Exported/ Lipoprotein	1.09659	0.162	NA	NA
BB0795		putative exported protein		Periplasmic/ Exported/ Lipoprotein	-1.37291	0.186685	-2.7235	NA
BB0796		conserved hypothetical protein		Conserved in organism other than E. coli	1.32198	0.0363257	1.04822	0.0608112
BB0797		hypothetical protein		Unknown proteins, no known homologs	1.24691	0.0378521	-1.00297	0.0487904
BB0798		conserved hypothetical protein		Conserved in organism other than E. coli	-1.04025	0.0332202	-1.33409	0.0989949
BB0799		conserved hypothetical protein		Conserved in organism other than E. coli	-1.17857	0.0755594	-1.06775	0.0155563
BB0800		conserved hypothetical protein		Conserved in organism other than E. coli	-1.30251	0.164953	-1.9377	0.0509117
BB0801		conserved hypothetical protein		Conserved in organism other than E. coli	-1.14737	0.0402525	-1.18437	0.066468
BB0802		conserved hypothetical protein		Conserved in organism other than E. coli	-1.24472	0.119545	-1.66011	NA
BB0803		conserved hypothetical protein		Conserved in organism other than E. coli	-1.49013	0.119575	-2.63839	0.0452548
BB0804		conserved hypothetical protein		Conserved in organism other than E. coli	-1.33195	0.154323	-2.98485	0.0650538
BB0805		conserved hypothetical protein		Conserved in organism other than E. coli	-1.3159	0.139123	-2.91852	NA
BB0806		conserved hypothetical protein		Conserved in organism other than E. coli	-1.10401	0.0949093	1.14975	0.148492
BB0807		conserved hypothetical protein		Conserved in organism other than E. coli	1.01042	0.0518785	-1.52516	0.158392
BB0808		conserved hypothetical protein		Conserved in organism other than E. coli	-1.04041	0.0734274	-1.12786	0.059397
BB0809		putative exported protein		Periplasmic/ Exported/ Lipoprotein	-1.30542	0.154547	-2.90061	0.197283
BB0810		putative ATPase with chaperone activity	chaperone activity		-1.04968	0.0498815	-1.13599	0.0869741
BB0811		conserved hypothetical protein		Conserved in organism other than E. coli	-1.56038	0.0338444	NA	NA
BB0812		putative lipoprotein		Periplasmic/ Exported/ Lipoprotein	-1.67181	0.0747955	-3.34844	0.0183848
BB0813		putative lipoprotein		Periplasmic/ Exported/ Lipoprotein	-1.11404	0.115236	-2.06643	NA
BB0814		conserved hypothetical protein		Conserved in organism other than E. coli	-1.0409	0.108811	-1.34932	0.17112
BB0815		putative outer membrane protein			-1.30395	0.137658	-3.66512	0.0176777
BB0816		putative membrane protein		Cell envelope	-1.05264	0.0389276	1.17513	0.0650538
BB0817		conserved hypothetical protein		Conserved in organism other than E. coli	-1.25942	0.130614	NA	NA
BB0818		hypothetical protein		Unknown proteins, no known homologs	-1.14191	0.0582395	-1.42153	0.0855599
BB0819		putative calcium			-1.19258	0.04468	-1.7882	NA
BB0820		putative lipoprotein		Periplasmic/ Exported/ Lipoprotein	1.06147	0.0483823	-1.0081	0.0148492
BB0821		autotransporter		transport	1.42357	0.0969042	1.38536	0.0671751
BB0822		putative phospholipase D protein	catalytic activity	metabolism	-1.13978	0.0273749	1.06514	0.0296985
BB0823	modD	molybdenum transport ATP-binding protein	ATP-binding cassette (ABC) transporter activity	transport	-1.25612	0.0473869	-1.2989	0.00424264
BB0824	modC	molybdenum transport system permease protein	transporter activity	transport	-1.15114	0.0243586	-1.25013	0.127986
BB0825	modB	molybdate-binding periplasmic protein precursor	sulfate porter activity	transport	-1.38966	0.0629748	-2.16285	0.0403051
BB0826		putative hydrolase	hydrolase activity		-1.17815	0.0085	-3.7346	0.0615183
BB0827		conserved hypothetical protein		Conserved in organism other than E. coli	-1.39326	0.280631	-4.06885	0.0148492
BB0828		hypothetical protein		Unknown proteins, no known homologs	-1.46799	0.111719	-2.04498	NA
BB0829		putative exported protein		Periplasmic/ Exported/ Lipoprotein	-1.10856	0.0391411	-1.18082	0.059397
BB0830		putative membrane protein		Cell envelope	1.13201	0.0425039	1.05415	0.0735391
BB0831		putative exported protein		Periplasmic/ Exported/ Lipoprotein	-1.01434	0.0712145	-1.28899	0.0579828
BB0832		probable TonB-dependent receptor	receptor activity	transport	1.06787	0.0314509	-1.18854	0.0982878
BB0833		putative regulatory protein	transcription factor activity	Global Regulatory Functions	-1.40653	0.0957794	-2.85507	0.0169706
BB0834		ornithine aminotransferase	ornithine-oxo-acid transaminase activity	arginine metabolism	-1.13114	0.0315357	-2.86199	NA
BB0835		arginase	arginase activity	metabolism	-1.59596	0.0918309	-1.92665	0.130815
BB0836		two-component response regulator	two-component response regulator activity	Global Regulatory Functions	-2.14939	0.0407635	NA	NA	negative	-2.63262	0	0
BB0837		putative lipoprotein		Periplasmic/ Exported/ Lipoprotein	-1.30339	0.0396799	-1.37442	0.22486
BB0838		putative lipoprotein		Periplasmic/ Exported/ Lipoprotein	-1.14405	0.0765338	-1.83398	0.0162635
BB0839		conserved hypothetical protein		Conserved in organism other than E. coli	1.24632	0.169865	1.17386	0.106773
BB0840	metG	methionyl-tRNA synthetase	tRNA binding	translation	1.10761	0.0455468	-1.92665	0.00636396
BB0841		putative exported protein		Periplasmic/ Exported/ Lipoprotein	1.18187	0.100118	-1.20489	0.202233
BB0842		putative iron sulfur binding protein	ATP binding	transport	-1.02112	0.0635063	-1.56143	NA
BB0843		putative exported protein		Periplasmic/ Exported/ Lipoprotein	1.16818	0.067041	-1.04417	0.0113137
BB0844		putative exported protein		Periplasmic/ Exported/ Lipoprotein	-1.17939	0.0689835	-1.99325	0.00282843
BB0845	dcd, dus, paxA	deoxycytidine triphosphate deaminase	dCTP deaminase activity	pyrimidine ribonucleotide biosynthesis	-1.05928	0.0437549	-1.7306	0.127279
BB0846		conseved hypothetical protein		Conserved in organism other than E. coli	-1.26449	0.0674119	-1.4775	0.219203
BB0847		putative lyase	lyase activity		-1.33579	0.05697	-1.19878	0.0608112
BB0848		putative acetyltransferase	N-acetyltransferase activity		-1.28127	0.0418991	-1.44322	0.0226274
BB0849		hypothetical protein		Unknown proteins, no known homologs	-1.20628	0.0457155	-1.17495	0.0339411
BB0850		probable orn	amino acid metabolism	metabolism	-1.26193	0.0145863	-2.364	0.0480833
BB0851		putative exported protein		Periplasmic/ Exported/ Lipoprotein	-1.02605	0.0641854	-1.33333	0.033234
BB0852	sodA	superoxide dismutase [Mn]	superoxide dismutase activity	superoxide metabolism	-1.62766	0.0536982	NA	NA
BB0853		probable metal transporter	metal ion transporter activity	transport	-1.33991	0.0279027	NA	NA
BB0854	gcvT	glycine cleavage system T protein	aminomethyltransferase activity	glycine catabolism	1.27817	0.0658977	-1.69706	0.026163
BB0855	gcvH	glycine cleavage system H protein		glycine catabolism	1.17131	0.126961	1.00846	0.0834386
BB0856	gcvP	glycine cleavage system P protein	glycine dehydrogenase (decarboxylating) activity	glycine decarboxylation via glycine cleavage system	1.28591	0.14364	-1.06679	0.059397
BB0857		putative GntR-family transcriptional regulator	transcription factor activity	Global Regulatory Functions	-1.24357	0.0448232	-1.67422	0.137179
BB0858		conserved hypothetical protein		metabolism	-1.56532	0.108725	-1.82548	0.262337
BB0859		putative exported protein		Periplasmic/ Exported/ Lipoprotein	-1.83379	0.22421	-7.34161	NA
BB0860		probable enoyl-CoA hydratase	catalytic activity	metabolism	-1.15765	0.0684031	-1.03096	0.00494975
BB0861		putative exported protein		Periplasmic/ Exported/ Lipoprotein	-1.15973	0.0471896	-1.42667	0.0997021
BB0862		conserved hypothetical protein		Conserved in organism other than E. coli	-1.26178	0.0124813	-1.07847	0.178191
BB0863		conserved hypothetical protein		Conserved in organism other than E. coli	-1.41572	NA	-5.10583	0.122329
BB0864		putative ABC transpoter ATP-binding protein	ATP-binding cassette (ABC) transporter activity	transport	1.20881	0.15539	-1.05677	0.0629325
BB0865		putative peptide ABC transporter permeaseprotein	transporter activity	transport	-1.27423	0.0550196	NA	NA
BB0866		putative ABC transporter permease protein	transporter activity	transport	-1.22386	0.0614668	NA	NA
BB0867		putative extracellular solute-binding protein	transporter activity	transport	1.06605	0.149631	1.1176	0.103238
BB0868	mmsA	putative methylmalonate-semialdehydedehydrogenase [acylating]	methylmalonate-semialdehyde dehydrogenase (acylating) activity	metabolism	-1.57192	0.0586367	NA	NA
BB0869		omega-amino acid--pyruvate aminotransferase	beta-alanine-pyruvate transaminase activity		-1.11834	0.0460237	1.29569	0.140714
BB0870		probable GntR-family transcriptional regulator	transcription factor activity	Global Regulatory Functions	-1.02432	0.0493565	-1.68978	0.0190919
BB0871	folA, tmrA	dihydrofolate reductase	dihydrofolate reductase activity	glycine biosynthesis	1.00595	0.0354836	1	0.0678823
BB0872		putative thymidylate synthase	thymidylate synthase activity	dTMP biosynthesis	-1.36233	0.118868	1.12437	0.0141421
BB0873		conserved hypothetical protein	response to stress	Folding and Ushering	-1.11186	0.158921	-1.33938	0.072832
BB0874		conserved hypothetical protein		Conserved in organism other than E. coli	-1.22498	0.0915283	-1.04602	0.0721249
BB0875		probable glycosyltransferase	transferase activity	lipid metabolism	-1.10528	0.0455686	-1.03277	0.132229
BB0876	wbpO	polysaccharide biosynthesis protein		Cell envelope	-1.0443	0.109473	-1.15093	0.145664
BB0877		UDP-N-acetylglucosamine C4 epimerase	catalytic activity	nucleotide-sugar metabolism	1.03051	0.0919764	-1.0884	0.00707107
BB0878		putative membrane protein	pathogenesis	Cell envelope	1.25763	0.0639117	-1.05867	0.0445477
BB0879		putative glycosyltranferase		biosynthesis	-1.14152	0.0834853	-2.03793	NA
BB0880		putative asparagine synthase	asparagine synthase (glutamine-hydrolyzing) activity	asparagine biosynthesis	1.0419	0.171334	-1.84112	NA
BB0881		putative glycosyltransferase	transferase activity	biosynthesis	1.49725	0.0761624	1.25338	0.241123
BB0882		putative glycosyltransferase	transferase activity	biosynthesis	1.06869	0.0681217	-1.92195	0.0523259
BB0883		putative glycosyltransferase	transferase activity	biosynthesis	-1.04592	0.0522632	NA	NA
BB0884	pgi	glucose-6-phosphate isomerase	glucose-6-phosphate isomerase activity	metabolism	-1.13257	0.0562011	-1.03277	0.0813173
BB0885	pgm	phosphoglucomutase	phosphomannomutase activity	carbohydrate metabolism	1.04197	0.036967	1.01311	0.0615183
BB0886		hypothetical protein		Unknown proteins, no known homologs	-1.08284	0.0468504	-1.14369	0.0827315
BB0887		putative oxidoreductase		electron transport	-1.22609	0.0770397	-1.36332	0.0905097
BB0888		putative two-component system responseregulator	two-component response regulator activity	Global Regulatory Functions	-1.03021	0.099	NA	NA
BB0889		putative two-component system sensor protein	two-component sensor molecule activity	signal transduction	1.03289	0.0908532	NA	NA
BB0890		putative sulfatase	sulfuric ester hydrolase activity	metabolism	1.52255	0.0767533	-1.05113	0.0120208
BB0891	fahA, fah	fumarylacetoacetase	aromatic amino acid family metabolism	metabolism	-1.06973	0.0690987	-1.16224	NA
BB0892	hmgA	homogentisate 1,2-dioxygenase	homogentisate 1,2-dioxygenase activity	phenylalanine catabolism	1.03274	0.0875	-1.44322	NA
BB0893		putative LysR-family transcriptional regulator	transcription factor activity	Global Regulatory Functions	1.02051	0.177188	-1.18082	0.11738
BB0894		conserved hypothetical protein		Conserved in organism other than E. coli	-1.06196	0.0471319	-1.2911	0.0148492
BB0895		putative oxygenase	monooxygenase activity	electron transport	-1.28348	0.0578076	1.03553	0.0650538
BB0896		putative cyclase			-1.14678	0.0125691	-1.11562	0.0403051
BB0897	mutM, fpg	formamidopyrimidine-DNA glycosylase	zinc ion binding	carbohydrate metabolism	-1.18689	0.0346235	1.03469	0.0424264
BB0898		conserved hypothetical protein		Conserved in organism other than E. coli	-1.20154	0.0202287	1.20135	0.0268701
BB0899		putative outer membrane lipoprotein	chaperone activity	intracellular protein transport	-1.13477	0.0208477	1.2225	0.0721249
BB0900	ispE, ipk	4-diphosphocytidyl-2-C-methyl-D-erythritolkinase	ATP binding	terpenoid biosynthesis	-1.00373	0.0409012	1.31134	0.0494975
BB0901	prsA, prs	ribose-phosphate pyrophosphokinase	magnesium ion binding	nucleoside metabolism	1.08989	0.0333854	1.11929	0.0989949
BB0902	rplY	50S ribosomal protein L25	structural constituent of ribosome	translation	1.07739	0.034379	1.33376	0.115258
BB0903	pth	peptidyl-tRNA hydrolase	aminoacyl-tRNA hydrolase activity	translation	1.03364	0.116514	-2	NA
BB0904		putative membrane protein		Cell envelope	-1.01416	0.168126	-1.71304	0.0820244
BB0905		conserved hypothetical protein	GTP binding	Conserved in organism other than E. coli	1.20643	0.0935753	-1.1459	0.0869741
BB0906		putative integrase	DNA binding	DNA recombination	-1.04657	0.101	NA	NA
BB0907		conserved hypothetical protein		regulation of cell cycle	-1.00224	0.0429982	-1.04095	0.11243
BB0908		putative helicase	DNA binding		-1.77021	0.0433758	-2.36874	0.0523259
BB0909		conserved hypothetical protein		Conserved in organism other than E. coli	-1.95036	0.0390089	-1.9799	NA	negative	-2.16622	0	0
BB0910		putative ATPase	ATP binding		-1.66188	0.0430391	1.0681	0.432042
BB0911		putative serine protease	subtilase activity	Folding and Ushering	-1.95433	0.0536948	-1.67422	NA	negative	-2.08443	0	0
BB0912		type III restriction-modification systemmethyltransferase	DNA binding	DNA methylation	1.21491	0.0514022	1.28299	0.0417193
BB0913		type III restriction enzyme	type III site-specific deoxyribonuclease activity	DNA restriction	-1.34595	0.0243885	-1.0859	0.0700036
BB0914		putative integrase		Laterally acquired elements	1.26179	0.111695	1.17386	0.0615183
BB0915		conserved hypothetical protein		Conserved in organism other than E. coli	-1.31797	0.158947	-2.18484	0.00282843
BB0916		autotransporter		transport	1.02247	0.0947435	-2.37827	NA
BB0917		putative regulatory protein	two-component response regulator activity	Global Regulatory Functions	-1.02081	0.0723574	-1.18318	0.155563
BB0918		putative exported protein		Periplasmic/ Exported/ Lipoprotein	-1.05661	0.0121721	-1.02028	0.270822
BB0919		putative TetR-family transcriptional regulator	transcription factor activity	Global Regulatory Functions	-1.28939	0.0180827	1.00169	0.0353553
BB0920		putative membrane protein		Cell envelope	-1.34811	0.0423727	1.04061	0.124451
BB0921		putative membrane protein	transporter activity	transport	-1.44246	0.0334641	1.0588	0.132229
BB0922		GntR family transcriptional regulator	transcription factor activity	Global Regulatory Functions	-1.21457	0.0260167	1.11125	0.0770746
BB0923		putative acetolactate synthase large subunit	acetolactate synthase activity		-1.08109	0.114532	1.08672	0.0954594
BB0924		putative lipoprotein		Periplasmic/ Exported/ Lipoprotein	-1.02879	0.0569531	1.42978	0.0947523
BB0925		putative taurine dioxygenase	oxidoreductase activity, acting on single donors with incorporation of molecular oxygen, incorporation of two atoms of oxygen	electron transport	-1.01251	0.0252864	1.30753	0.0120208
BB0926	maeB	NADP-dependent malic enzyme	malate dehydrogenase (oxaloacetate-decarboxylating) (NADP+) activity	metabolism	1.08067	0.0608985	1.34052	0.0487904
BB0927		LysR family regulatory protein	transcription factor activity	Global Regulatory Functions	1.09927	0.0383614	1.34983	0.0586899
BB0928		binding-protein-dependent transport systemsinner membrane component	transporter activity	transport	-1.04984	0.0918338	-1.17612	0.0282843
BB0929		binding-protein-dependent transport systemsinner membrane component	transporter activity	transport	1.04271	0.0560236	-1.7044	0.00919239
BB0930		ABC transporter ATP-binding protein	ATP-binding cassette (ABC) transporter activity	transport	-1.41751	0.0901709	-1.81567	NA
BB0931		bacterial extracellular solute-binding protein	transporter activity	transport	-1.42472	0.0946256	-4.68119	0.026163
BB0932		conserved hypothetical protein		Conserved in organism other than E. coli	-1.19672	0.0382805	-1.47198	NA
BB0933		LysR family regulatory protein	transcription factor activity	Global Regulatory Functions	-1.46729	0.0625695	-1.89727	0.0749533
BB0934		putative exported protein		Periplasmic/ Exported/ Lipoprotein	1.02128	0.0320496	-1.05725	0.0367696
BB0935		conserved hypothetical protein		Conserved in organism other than E. coli	-1.30339	0.0612973	-2.72664	0.0445477
BB0936		putative ArsR family transcriptional regulator	transcription factor activity	Global Regulatory Functions	2.30141	0.172359	-1.9799	0.00707107	positive	3.84585	0	0
BB0937		putative exported protein		Periplasmic/ Exported/ Lipoprotein	3.09481	0.236263	-1.57076	0.0827315	positive	4.83768	0	0.0702196
BB0938		hypothetical protein		Unknown proteins, no known homologs	-1.05017	0.0387141	1.11252	0.059397
BB0939		putative transport protein			-1.25895	0.0294689	NA	NA
BB0940	fdx	ferredoxin	electron transporter activity	metabolism	-1.06939	0.0232256	-1.60271	0.109602
BB0941	coaD, kdtB	phosphopantetheine adenylyltransferase	pantetheine-phosphate adenylyltransferase activity	coenzyme A biosynthesis	-1.34893	0.0289821	-2.08834	NA
BB0942		conserved hypothetical protein	S-adenosylmethionine-dependent methyltransferase activity		-1.11242	0.127118	-1.02205	0.00494975
BB0943	ftsY	cell division protein	RNA binding	cytokinesis	-1.41841	0.0456353	-1.01721	0.0240416
BB0944		conserved hypothetical protein	adenylate cyclase activity	cAMP biosynthesis	-1.37039	0.069144	1.17386	0.1393
BB0945		binding-protein-dependent transport systempermease protein	transporter activity	transport	-1.41602	0.0351543	-1.09953	0.0155563
BB0946		binding-protein-dependent transport systemsinner membrane component	transporter activity	transport	-1.28397	0.0492222	1.08756	0.0289914
BB0947		putative transport system ATP-binding protein	ATP-binding cassette (ABC) transporter activity	transport	-1.08231	0.0588493	1.15567	0.239002
BB0948		putative exported protein		Periplasmic/ Exported/ Lipoprotein	-1.00992	0.0770763	1.31218	0.0367696
BB0949		putative transcriptional regulator	DNA binding	regulation of transcription, DNA-dependent	-1.02627	0.0937477	1.21404	0
BB0950		haloacid dehalogenase-like hydrolase	hydrolase activity	metabolism	-1.01958	0.0947712	1.35025	0.0650538
BB0951	ribB	putative 3,4-dihydroxy-2-butanone 4-phosphatesynthase	vitamin B2 biosynthesis	metabolism	-1.03816	0.0843124	1.24915	0.0940452
BB0952	ribH	putative 6,7-dimethyl-8-ribityllumazinesynthase	vitamin B2 biosynthesis	metabolism	-1.12358	0.0984485	1.18824	0.0205061
BB0953	nusB, ssyB	N utilization substance protein B	RNA binding	transcription termination	-1.00329	0.0797703	1.22758	0.0636396
BB0954	thiL	putative thiamine-monophosphate kinase	thiamin-phosphate kinase activity	thiamin biosynthesis	-1.24371	0.101646	-1.06534	0.222739
BB0955		putative phosphatidylglycerophosphatase	phosphatidylglycerophosphatase activity	lipid metabolism	-1.35902	0.0572922	-1.11457	0.0304056
BB0956		conserved hypothetical protein		Conserved in organism other than E. coli	-1.25448	0.0936549	-1.06823	0.0106066
BB0957	pyrF	putative orotidine 5'-phosphate decarboxylase	orotidine-5'-phosphate decarboxylase activity	'de novo' pyrimidine base biosynthesis	-1.21765	0.0753435	-1.2696	0.103238
BB0958	ndh	putative NADH dehydrogenase	NADH dehydrogenase activity	metabolism	-1.15348	0.0328587	-2.11449	NA
BB0959	dgkA	putative diacylglycerol kinase	diacylglycerol kinase activity	phospholipid biosynthesis	1.08037	0.0411626	-2.58643	0.0268701
BB0960	brkB	serum resistance protein	ribonuclease activity		1.92424	0.182535	NA	NA	positive	2.68764	0	0
BB0961	brkA	serum resistance protein (pseudogene)		Cell envelope	3.77869	0.586417	-2.35928	0.0226274	positive	3.94059	0	0
BB0962	cpn60, groEL, mopA, groL	60 kDa chaperonin	chaperone activity	protein refolding	-1.14678	0.131323	1.44289	0.0289914
BB0963	cpn10, groES	10 kDa chaperonin	chaperone activity		-1.34032	0.0886043	1.25381	0.0551543
BB0964		hypothetical protein		Unknown proteins, no known homologs	-1.26893	0.1135	NA	NA
BB0965		conserved hypothetical protein	racemase and epimerase activity, acting on amino acids and derivatives	metabolism	-2.2142	0.112815	-2.4472	NA	negative	-1.65855	0	2.93554
BB0966		hypothetical protein		Unknown proteins, no known homologs	1.0256	0.087274	NA	NA
BB0967		putative dehydrogenase		metabolism	-1.06956	0.107682	-2.1413	NA
BB0968		putative exported protein		Periplasmic/ Exported/ Lipoprotein	-1.19683	0.198474	NA	NA
BB0969		LysR-family transcriptional regulator	transcription factor activity	Global Regulatory Functions	-1.18351	0.139887	-1.06534	0.0289914
BB0970		conserved hypothetical protein		Conserved in organism other than E. coli	1.19504	0.076675	NA	NA
BB0971		putative exported protein		Periplasmic/ Exported/ Lipoprotein	-1.30153	0.109813	-2.4321	NA
BB0972		probable transcriptional regulator	DNA binding	Global Regulatory Functions	-1.11168	0.0755851	1.09264	0.137886
BB0973		probable carboxymuconolactone decarboxylase	4-carboxymuconolactone decarboxylase activity	aromatic compound metabolism	1.08766	0.0405742	1.05118	0.0120208
BB0974		probable 6-phosphogluconate dehydrogenase	phosphogluconate dehydrogenase (decarboxylating) activity	pentose-phosphate shunt	1.04316	0.0303891	1.12394	0.101116
BB0975		probable hydrolase	hydrolase activity	metabolism	-1.32368	0.0195021	NA	NA
BB0976		lactate permease family protwin	lactate transporter activity	lactate transport	1.36556	0.0750249	-1.0034	NA
BB0977		putative membrane protein		Cell envelope	1.54859	0.161121	1.58545	0.152735
BB0978	ggt	gamma-glutamyltranspeptidase precursor	gamma-glutamyltransferase activity		1.21848	0.067696	-1.7044	0.092631
BB0979		putative universal stress protein		Folding and Ushering	1.02679	0.0718254	-1.48773	0.0714178
BB0980		putative GnaT-family acetyltransferase	N-acetyltransferase activity		-1.19832	0.0217505	-1.05961	0.0968736
BB0981		probable acyl-CoA dehydrogenase	acyl-CoA dehydrogenase activity	electron transport	-1.24634	0.0125	-1.73314	NA
BB0982		conserved hypothetical protein		metabolism	-1.22924	0.134395	-1.50958	NA
BB0983		putative exported protein		Periplasmic/ Exported/ Lipoprotein	-1.12185	0.145155	-1.68256	0.0700036
BB0984		probable LysR-family transcriptional regulator	transcription factor activity	Global Regulatory Functions	1.45394	0.15165	-1.7855	0.0551543
BB0985		hypothetical protein		Unknown proteins, no known homologs	2.2606	0.130174	-2.75204	0.0120208	positive	3.84837	0	0
BB0986		putative exported protein		Periplasmic/ Exported/ Lipoprotein	-1.00871	0.0791553	-1.10882	NA
BB0987		putative membrane protein		Cell envelope	-1.15348	0.0334399	1.11421	0.059397
BB0988		conserved hypothetical protein		Conserved in organism other than E. coli	1.1274	0.0295	-1.3857	NA
BB0989		putative exported protein		Periplasmic/ Exported/ Lipoprotein	-1.11448	0.153303	NA	NA
BB0990		probable LysR-family transcriptional regulator	transcription factor activity	Global Regulatory Functions	-1.17199	0.0338637	NA	NA
BB0991		putative membrane protein		Cell envelope	-1.0927	0.106691	-1.36806	0.00707107
BB0992		probable pyridine nucleotide-disulphideoxidoreductase	disulfide oxidoreductase activity	electron transport	-1.25177	0.112253	-2.14714	0.053033
BB0993		conserved hypothetical protein		Conserved in organism other than E. coli	-1.2825	0.0815452	-1.2813	0.25668
BB0994		probable FAD dependent oxidoreductase	oxidoreductase activity	electron transport	-1.04821	0.163106	-1.76682	0.189505
BB0995		putative dipeptidase	membrane dipeptidase activity	proteolysis and peptidolysis	1.02813	0.114921	-1.15939	0.120915
BB0996		probable ABC transporter ATP-binding protein	ATP-binding cassette (ABC) transporter activity	transport	-1.14444	0.0855	-2.80095	NA
BB0997		putative inner membrane component ofbinding-protein-dependent transport system	transporter activity	transport	1.10284	0.108453	-1.48028	0.0714178
BB0998		putative inner membrane component ofbinding-protein-dependent transport system	transporter activity	transport	-1.4758	0.158595	-1.98322	0.0311127
BB0999		putative extracellular solute-binding protein	transporter activity	transport	1.02173	0.0757889	-1.32586	0.00919239
BB1000		probable LysR-family transcriptional regulator	transcription factor activity	Global Regulatory Functions	1.18038	0.0251746	-1.2696	0.0353553
BB1001		putative enoyl-CoA hydratase	catalytic activity	metabolism	1.19437	0.0644297	1.22081	0.0749533
BB1002		putative long-chain-fatty-acid-CoA ligase	ligase activity	metabolism	-1.03608	0.0641454	-1.29819	0.132229
BB1003		putative exported protein		Periplasmic/ Exported/ Lipoprotein	1.01645	0.0276326	-1.6281	0.159806
BB1004		LysR-family transcriptioanl regulator	transcription factor activity	Global Regulatory Functions	-1.55281	0.119265	-2.57236	0.167584
BB1005		probable ATP-binding component of ABCtransporter	ATP-binding cassette (ABC) transporter activity	transport	-1.23944	0.0354883	-2.01363	NA
BB1006		inner membrane component of ABC transporter	transporter activity	transport	-1.47852	0.0860875	NA	NA
BB1007		inner membrane component of ABC transporter	transporter activity	transport	-1.04592	0.0676085	-1.05442	0.00707107
BB1008		substrate binding component of ABC transporter	transporter activity	transport	-1.0081	0.0315493	-1.09343	0.0240416
BB1009		hypothetical protein	hydrolase activity	nucleotide metabolism	1.04599	0.0672511	-1.17146	0.33234
BB1010	phnA	phosphonoacetate hydrolase	hydrolase activity	nucleotide metabolism	-1.37515	0.136256	-2.45483	0.11243
BB1011	phnR	LysR-family transcriptional regulator	transcription factor activity	Global Regulatory Functions	-1.14113	0.0417562	-1.23899	0.0410122
BB1012		putative ornithine cyclodeaminase	ornithine cyclodeaminase activity		1.04152	0.1427	-1.60054	0.168999
BB1013	aphA, aph	acetylpolyamine aminohydrolase	hydrolase activity		-1.23194	0.21504	-2.67421	NA
BB1014	leuB	3-isopropylmalate dehydrogenase	3-isopropylmalate dehydrogenase activity	leucine biosynthesis	-1.48618	0.128901	-2.92937	0.0629325
BB1015	leuD	3-isopropylmalate dehydratase small subunit	3-isopropylmalate dehydratase activity	leucine biosynthesis	-1.39665	0.0949997	-1.33333	0.0346482
BB1016	leuC	3-isopropylmalate dehydratase large subunit	3-isopropylmalate dehydratase activity	metabolism	-2.08051	0.0246859	NA	NA	negative	-1.67472	0	2.72415
BB1017		putative exported protein		Periplasmic/ Exported/ Lipoprotein	-1.34434	0.109293	-2.61504	NA
BB1018		probable transmembrane permease ABC transporterprotein	transporter activity	transport	1.04941	0.0369815	1.15609	0.106773
BB1019		ATP-binding ABC transporter protein	ATP-binding cassette (ABC) transporter activity	transport	-1.08739	0.167342	-2.49367	0.086267
BB1020		LysR-family transcriptional regulator	transcription factor activity	Global Regulatory Functions	-1.16832	0.113338	-1.41727	NA
BB1021		putative membrane protein		Cell envelope	-1.16609	0.0302574	-1.49242	0.0438406
BB1022		putative acetyltransferase	N-acetyltransferase activity		-1.13573	0.0400042	NA	NA
BB1023		putative exported protein		Periplasmic/ Exported/ Lipoprotein	-1.48257	0.1112	-1.14038	0.0558614
BB1024		LysR-family transcriptional regulator	transcription factor activity	Global Regulatory Functions	-1.6344	0.129521	-4.06885	0.00494975
BB1025		probable sulfatase	sulfuric ester hydrolase activity	metabolism	1.00313	0.0654536	1.04103	0.153442
BB1026		putative exported protein		Periplasmic/ Exported/ Lipoprotein	-1.28983	0.0759739	-1.24684	0.0579828
BB1027		LysR-family transcriptional regulator	transcription factor activity	Global Regulatory Functions	-1.19258	0.0716803	-1.17553	0.00919239
BB1028		putative exported protein		Periplasmic/ Exported/ Lipoprotein	-1.23432	0.0761833	-1.29819	0.0205061
BB1029		putative enoyl-CoA hydratase	isomerase activity	metabolism	-1.40801	0.15736	NA	NA
BB1030		putative exported protein		Periplasmic/ Exported/ Lipoprotein	-1.36704	0.110807	-2.0976	0.0770746
BB1031		3-hydroxyisobutyrate dehydrogenase	3-hydroxyisobutyrate dehydrogenase activity		-1.73573	0.110211	-3.571	0.0678823
BB1032		hypothetical protein		Unknown proteins, no known homologs	-1.19897	0.0589675	NA	NA
BB1033		putative 2,4-dihydroxyhept-2-ene-1,7-dioic acidaldolase	aldolase activity	metabolism	1.32803	0.144342	1.23477	0.00494975
BB1034		conserved hypothetical protein		Conserved in organism other than E. coli	-1.15328	0.0319635	NA	NA
BB1035		putative ribulose bisphosphatecarboxylaseoxygenase,large subunit	ribulose-bisphosphate carboxylase activity	carbon utilization by fixation of carbon dioxide	1.15218	0.0942129	-1.19334	0.109602
BB1036		LysR-family transcriptional regulator	transcription factor activity	Global Regulatory Functions	1.07367	0.0824341	1.13071	0.00353553
BB1037		LysR-family transcriptional regulator	transcription factor activity	regulation of transcription, DNA-dependent	1.15002	0.093162	1.10702	0.0586899
BB1038		probable enoyl-CoA hydratase	enoyl-CoA hydratase activity	metabolism	-1.60205	0.117766	-2.31311	NA
BB1039		putative exported protein		Periplasmic/ Exported/ Lipoprotein	-1.77845	0.0877389	-3.22071	0.106066
BB1040		conserved hypothetical protein		metabolism	-1.37529	0.0886767	-2.2344	NA
BB1041		LysR-family transcriptional regulator	transcription factor activity	Global Regulatory Functions	-1.79173	0.111296	-2.61794	0.0827315
BB1042		extracellular solute-binding protein			-1.78531	0.174036	-2.9403	NA
BB1043		ATP-binding component of ABC transporter	ATP-binding cassette (ABC) transporter activity	transport	-1.17939	0.0234147	-2.68636	0.0834386
BB1044		inner membrane component of ABC transporter	transporter activity	transport	-1.14432	0.052501	-1.35862	0.00424264
BB1045	aatB	aspartate aminotransferase	aspartate transaminase activity	biosynthesis	-1.20607	0.0740814	-1.94408	0.00848528
BB1046	pepM	phosphoenolpyruvate phosphomutase	phosphoenolpyruvate mutase activity		-1.5084	0.0573765	NA	NA
BB1047		putative exported protein		Periplasmic/ Exported/ Lipoprotein	-1.7062	0.154576	-2.88293	0.0806102
BB1048		putative gluconolactonase	gluconolactonase activity		-1.51193	0.150356	-2.68027	0.0268701
BB1049		putative aldolase	aldolase activity		-1.07487	0.0622187	1.11929	0.046669
BB1050		putative dehydrogenase	oxidoreductase activity, acting on the CH-OH group of donors, NAD or NADP as acceptor	L-serine biosynthesis	-1.57133	0.0906593	NA	NA
BB1053		putative dioxygenase	taurine dioxygenase activity	electron transport	-1.53332	0.0419139	-2.51757	0.0176777
BB1054		LysR-family transcriptional regulator	transcription factor activity	Global Regulatory Functions	-1.40948	0.0305519	-2.36874	NA
BB1055	metY	O-acetylhomoserine sulfhydrylase	amino acid metabolism	metabolism	-1.68734	0.0445314	NA	NA
BB1056		conserved hypothetical protein	catalytic activity	aromatic compound metabolism	-1.21721	0.0593026	-1.87917	NA
BB1057		conserved hypothetical protein		Conserved in organism other than E. coli	-1.1726	0.0689746	-6.7931	NA
BB1058		GntR-family transcriptional regulator	transcription factor activity	Global Regulatory Functions	-1.15626	0.0755644	-1.04371	0.156271
BB1059		conserved hypothetical protein		metabolism	-1.19845	0.121728	-3.77636	NA
BB1060		probable extracellular solute-binding protein		transport	-1.40038	0.00366667	-3.88816	NA
BB1061		putative integral membrane transport protein			-1.19131	0.124	-4.82449	NA
BB1062		putative membrane protein		Cell envelope	-1.11426	0.192507	-3.54423	0.00777817
BB1063		conserved hypothetical protein		Conserved in organism other than E. coli	-1.35628	0.229823	-4	0.0162635
BB1064		putative hydrolase	hydrolase activity		-1.00591	0.0447071	-1.5739	NA
BB1065		putative NAD dependent epimerase	oxidoreductase activity	nucleotide-sugar metabolism	-1.12735	0.0883107	-4.8642	NA
BB1066		putative membrane protein		Cell envelope	1.13856	0.0714913	NA	NA
BB1067		putative exported protein		Periplasmic/ Exported/ Lipoprotein	NA	NA	-6.91228	NA
BB1068		probable aldehyde dehydrogenase	oxidoreductase activity	metabolism	-1.04268	0.0675599	NA	NA
BB1069		putative dehydrogenase	oxidoreductase activity, acting on CH-OH group of donors	metabolism	-1.12152	0.1585	NA	NA
BB1070		conserved hypothetical protein		Conserved in organism other than E. coli	1.01682	0.111191	NA	NA
BB1071		putative permease component of ABC transporter	transporter activity	transport	-2.84945	NA	NA	NA
BB1072		ATP-binding component of ABC transporter	ATP-binding cassette (ABC) transporter activity	transport	1.38521	0.145338	NA	NA
BB1073		putative substrate binding component of ABCtransporter		transport	1.41078	0.151595	-1.01242	0.119501
BB1074		GntR-family transcriptional regulator	transcription factor activity	Global Regulatory Functions	1.48132	0.0343244	1.20685	0.0120208
BB1075		putative carboxymuconolactone decarboxylase	4-carboxymuconolactone decarboxylase activity	metabolism	1.44798	0.0773135	1.76142	0.123037
BB1076		conserved hypothetical protein	aminocarboxymuconate-semialdehyde decarboxylase activity	metabolism	1.05797	0.0658323	-1.09953	0.0919239
BB1077		conserved hypothetical protein	aminocarboxymuconate-semialdehyde decarboxylase activity	metabolism	-1.3216	0.0576782	-2.32677	NA
BB1078		putative exported protein		Periplasmic/ Exported/ Lipoprotein	-1.24357	0.0085	NA	NA
BB1079		putative hydrolase	hydrolase activity		-1.02066	0.0533388	-1.09242	0.0339411
BB1080		putative isochorismatase	catalytic activity	metabolism	-1.12518	0.0988934	NA	NA
BB1081		LysR-family transcriptional regulator	transcription factor activity	Global Regulatory Functions	-1.42654	0.228291	NA	NA
BB1082		putative acetyltransferase	N-acetyltransferase activity		-1.12073	0.175249	-2.2907	NA
BB1083		conserved hypothetical protein		metabolism	1.27579	0.00948918	1.14467	0.019799
BB1084		TetR-family transcriptional regulator	transcription factor activity	Global Regulatory Functions	1.16133	0.1425	NA	NA
BB1085		putative exported protein		Periplasmic/ Exported/ Lipoprotein	1.25584	0.0420671	1.15778	0.109602
BB1086		putative thiolase	catalytic activity	fatty acid biosynthesis	-1.84487	NA	-3.51786	0.0579828
BB1087		putative enoyl-CoA hydratase	isomerase activity	metabolism	-1.34649	0.20338	NA	NA
BB1088		putative short chain dehydrogenase	oxidoreductase activity	metabolism	-1.07059	NA	1.13452	NA
BB1089		putative enoyl-CoA hydratase	isomerase activity	metabolism	-1.10372	0.12817	-1.63712	0.114551
BB1090		conserved hypothetical protein		metabolism	-1.10003	0.111134	-1.91883	0.0296985
BB1091		LysR-FAMILY transcriptional regulator	transcription factor activity	Global Regulatory Functions	-1.25331	0.0794157	-1.54207	0.0516188
BB1092		putative exported protein		Periplasmic/ Exported/ Lipoprotein	-1.26107	0.134504	NA	NA
BB1093		putative membrane protein		Cell envelope	-1.356	0.128545	-1.64281	0.118087
BB1094		conserved hypothetical protein	catalytic activity	Conserved in organism other than E. coli	-1.34369	0.0699704	-2.07187	0.374059
BB1095		putative exported protein		Periplasmic/ Exported/ Lipoprotein	-1.4829	0.121217	-2.45228	NA
BB1096		LysR-family transcriptional regulator	transcription factor activity	Global Regulatory Functions	1.03661	0.101487	-1.0884	0.0367696
BB1097		conserved hypothetical protein		metabolism	-1.13092	0.073344	-1.3371	0.046669
BB1098		probable acyl-CoA dehydrogenase	acyl-CoA dehydrogenase activity	electron transport	1.32788	0.0546882	1.30288	0.0268701
BB1099		putative exported protein		Periplasmic/ Exported/ Lipoprotein	1.25659	0.0431018	1.2022	0.0296985
BB1100	mgtA	Mg(2+) transport ATPase	ATP binding	metabolism	1.04227	0.0864968	-1.07065	0.172534
BB1101		two component sensor kinase	two-component sensor molecule activity	Global Regulatory Functions	-1.12236	0.032397	-1.89423	NA
BB1102		two component response regulator	two-component response regulator activity	Global Regulatory Functions	-1.33695	0.143323	-3.01146	0.0247487
BB1103		putative exported protein		Periplasmic/ Exported/ Lipoprotein	-1.28421	0.0168869	-1.97329	NA
BB1104		[2Fe-2S] protein	oxidoreductase activity	electron transport	-1.25191	0.126837	NA	NA
BB1105		conserved hypothetical protein		Conserved in organism other than E. coli	-1.23784	0.092753	-1.44853	0.128693
BB1106		ferredoxin	electron transporter activity	metabolism	-1.40824	0.141976	-3.23836	0.115966
BB1107		ferredoxin reductase	disulfide oxidoreductase activity	metabolism	-1.25051	0.163594	-1.9377	0.0424264
BB1108	dapA	putative dihydrodipicolinate synthase	dihydrodipicolinate synthase activity		-1.3229	0.132561	-2.39757	NA
BB1109	lldD, lctD	FMN-dependent dehydrogenase	L-lactate dehydrogenase (cytochrome) activity	electron transport	1.15077	0.0385769	1.1654	0.0318198
BB1110		conserved hypothetical protein		Conserved in organism other than E. coli	1.01667	0.045099	1.02919	0.11243
BB1111		IclR-family transcriptional regulator	DNA binding	regulation of transcription, DNA-dependent	1.33785	0.146349	1.2445	0.0452548
BB1112		LysR-family transcriptional regulator	transcription factor activity	Global Regulatory Functions	-1.49145	0.117275	-2.08099	NA
BB1113		probable short chain dehydrogenase	oxidoreductase activity	metabolism	-1.49777	0.110855	-1.61807	0.0601041
BB1114		putative exported protein		Periplasmic/ Exported/ Lipoprotein	-1.44868	0.0357491	NA	NA
BB1115		hypothetical protein		Unknown proteins, no known homologs	-1.46883	0.124622	-2.57516	NA
BB1116		nitrilase	nitrilase activity	nitrogen metabolism	-1.87765	0.15655	-4.09705	0.0671751
BB1117		conserved hypothetical protein		Conserved in organism other than E. coli	1.12547	0.0729153	-1.10882	0.0820244
BB1118		putative exported protein		Periplasmic/ Exported/ Lipoprotein	-1.58169	0.159052	-4.36162	NA
BB1119		LysR-family transcriptional regulator	transcription factor activity	regulation of transcription, DNA-dependent	-1.37302	0.116307	-2.78774	0.086267
BB1120		two-component system response regulator	two-component response regulator activity	Global Regulatory Functions	1.01533	0.0310376	1.25592	0.0742462
BB1121		putative exported protein		Periplasmic/ Exported/ Lipoprotein	1.04018	0.0350965	-1.75241	0.0982878
BB1122		two-component system sensor kinase	signal transducer activity	Global Regulatory Functions	-1.00134	0.0250874	-1.12894	0.0339411
BB1123		putative enoyl-CoA hydratase	catalytic activity	metabolism	1.13931	0.180378	1.05203	0.118087
BB1124		putative enoyl-CoA hydratase	isomerase activity	metabolism	-1.54	0.0738306	1.00719	0.0883883
BB1125		putative long-chain-fatty-acid-CoA ligase	ligase activity	metabolism	-1.26606	0.0195	-2.68942	0.204354
BB1126		probable acyl-CoA dehydrogenase	acyl-CoA dehydrogenase activity	electron transport	-1.2971	0.0513366	NA	NA
BB1127		conserved hypothetical protein		Conserved in organism other than E. coli	-1.19491	0.0377884	-1.3032	0.0678823
BB1128		conserved hypothetical protein		Conserved in organism other than E. coli	-1.16407	0.0428104	-1.14038	0.170413
BB1129		conserved hypothetical protein		Conserved in organism other than E. coli	-1.32808	0.111027	-3.36273	0.0176777
BB1130		probable outer membrane protein			1.08052	0.0365103	-1.92352	0.0445477
BB1131		putative membrane protein		Cell envelope	1.06191	0.0255635	-2.08282	0.0671751
BB1132		conserved hypothetical protein		Conserved in organism other than E. coli	1.23843	0.103621	-1.19454	0.101116
BB1133		hypothetical protein		Unknown proteins, no known homologs	-1.24322	0.0497818	NA	NA
BB1134		conserved hypothetical protein		Conserved in organism other than E. coli	-1.5802	0.130785	-3.49188	0.0898026
BB1135		hypothetical protein		Unknown proteins, no known homologs	-1.1071	0.0365639	-1.27097	0.0749533
BB1136		putative calcium			-1.46613	0.082415	-3.02302	0.0834386
BB1137		conserved hypothetical protein		Conserved in organism other than E. coli	-1.24842	0.042559	-1.27302	0.0417193
BB1138		putative GntR-family transcriptional regulator	transcription factor activity	Global Regulatory Functions	-1.45103	0.0178763	NA	NA
BB1139		putative membrane protein		Cell envelope	-1.53087	0.0687327	-2.37349	0.162635
BB1140		putative membrane protein		Cell envelope	-1.05462	0.0924033	-1.01721	0.199404
BB1141		putative GntR-family transcriptional regulator	transcription factor activity	regulation of transcription, DNA-dependent	1.21908	0.0605565	1.10998	0.148492
BB1142		putative amidase	amidase activity		-1.29861	0.0474845	NA	NA
BB1143		conserved hypothetical protein		metabolism	-1.43814	0.0348077	NA	NA
BB1144		putative enoyl-CoA hydratase	catalytic activity	metabolism	-1.04804	0.0889088	-1.23899	0.0480833
BB1145		putative exported protein		Periplasmic/ Exported/ Lipoprotein	-1.05995	0.0382716	-1.45567	0.0127279
BB1146		putative inner membrane component ofbinding-protein-dependent transport system	transporter activity	transport	-1.32839	0.0549479	-1.54915	0.019799
BB1147		probable ATP-binding component of ABCtransporter	ATP-binding cassette (ABC) transporter activity	transport	1.17026	0.139792	1.15398	0.110309
BB1148		conserved hypothetical protein	hydrolase activity, acting on carbon-nitrogen (but not peptide) bonds	carbohydrate metabolism	-1.54332	0.0789079	-1.50095	0.153442
BB1149		probable short chain dehydrogenase	oxidoreductase activity	metabolism	-1.51876	0.0507324	-6.22105	NA
BB1150		putative transcriptional regulator	DNA binding	regulation of transcription, DNA-dependent	-1.63003	0.0399562	-5.16157	NA
BB1151		putative branched-chain amino acid-bindingprotein			-1.64198	0.0879591	-5.68269	0.0509117
BB1152		conserved hypothetical protein	oxidoreductase activity	metabolism	-1.25051	0.0464013	NA	NA
BB1153		acetyl-CoA synthetase	catalytic activity	metabolism	-1.04235	0.149507	-5.49767	NA
BB1154		conserved hypothetical protein		Conserved in organism other than E. coli	-1.18836	0.077342	NA	NA
BB1155		probable permease component of branched-chainamino acid transporter	transporter activity	transport	-1.22654	0.0166082	-3.95318	NA
BB1156		probable permease component of branched-chainamino acid transporter	transporter activity	transport	-1.31693	0.0118369	NA	NA
BB1157	livG, livF	high-affinity branched-chain amino acidtransport ATP-binding protein	ATP-binding cassette (ABC) transporter activity	transport	1.04941	0.160054	1.04146	0.0692965
BB1158	livF, livG	high-affinity branched-chain amino acidtransport ATP-binding protein	ATP-binding cassette (ABC) transporter activity	transport	-1.35137	0.157025	-3.13528	NA
BB1159		putative NADH:flavin oxidoreductase	oxidoreductase activity	metabolism	-1.24541	0.111965	-1.57181	0.124451
BB1160		putative lysR-family transcriptional regulator	transcription factor activity	Global Regulatory Functions	-1.14065	0.0450174	NA	NA
BB1161		conserved hypothetical protein		Conserved in organism other than E. coli	1.01384	0.0863384	-1.19334	0.0289914
BB1162		conserved hypothetical protein	zinc ion binding	Conserved in organism other than E. coli	-1.32212	NA	NA	NA
BB1163		putative membrane transport protein	transporter activity	transport	-1.00194	0.0780135	-1.33333	0.217082
BB1164		putative LysR-family transcriptional regulator	transcription factor activity	Global Regulatory Functions	-1.04332	0.0472473	1.01311	0.0572756
BB1165		putative exported protein		Periplasmic/ Exported/ Lipoprotein	-1.18376	0.322184	NA	NA
BB1166		amidase	amidase activity		-1.00901	0.0483283	-1.02872	0.0565685
BB1167	ribE, ribC	riboflavin synthase alpha chain	riboflavin synthase activity	metabolism	-1.27871	0.116691	NA	NA
BB1168		putative exported protein		Periplasmic/ Exported/ Lipoprotein	-1.50955	0.0987321	1.58883	0.465276
BB1169		putative AsnC-family transcriptional regulator	transcription factor activity	Global Regulatory Functions	-2.12492	0.0236432	NA	NA	negative	-2.54666	0	0
BB1170		hypothetical protein		Unknown proteins, no known homologs	1.11743	0.16977	NA	NA
BB1171		putative acid CoA ligase	ligase activity	metabolism	1.30912	0.12808	-1.05725	0.149907
BB1172		conserved hypothetical protein		Conserved in organism other than E. coli	1.07382	0.0654476	-1.0849	0.0883883
BB1173		putative ABC transport proteins, inner membranecomponent	transporter activity	transport	1.01235	0.0504775	-1.01765	0.0912168
BB1174		putative ABC transport proteins, ATP-bindingcomponent	ATP-binding cassette (ABC) transporter activity	transport	1.03408	0.136993	1.17809	0.0883883
BB1175		putative exported protein		Periplasmic/ Exported/ Lipoprotein	1.1143	0.195486	1.3088	0.0480833
BB1176		conserved hypothetical protein	catalytic activity	Conserved in organism other than E. coli	1.09406	0.243244	1.33376	0.033234
BB1177		putative alcohol dehydrogenase	NADPH:quinone reductase activity	metabolism	1.06043	0.183491	1.41582	0.130815
BB1178		conserved hypothetical protein		Conserved in organism other than E. coli	1.11341	0.272071	1.40398	0.0275772
BB1179		conserved hypothetical protein		Conserved in organism other than E. coli	-1.11574	0.0594013	-1.13763	0.0254558
BB1180		probable cation-transporting ATPase	copper-exporting ATPase activity	metabolism	-1.06685	0.0962056	NA	NA
BB1181		conserved hypothetical protein	catalytic activity	Conserved in organism other than E. coli	-1.14036	0.0304116	1.06599	0.0339411
BB1182	tyrB	aromatic-amino-acid aminotransferase	aromatic-amino-acid transaminase activity	biosynthesis	-1.01757	0.0557056	1.21277	0.0176777
BB1183		putative isochorismatase	catalytic activity	metabolism	-1.10437	0.026147	1.08376	NA
BB1184		putative exported protein		Periplasmic/ Exported/ Lipoprotein	-1.26535	0.0267862	-1.20122	NA
BB1185		putative exported protein		Periplasmic/ Exported/ Lipoprotein	-1.20954	0.0465191	-1.06727	0.0558614
BB1186		putative hemolysin, homophilic cell adhesion	calcium ion binding	Periplasmic/ Exported/ Lipoprotein	-1.69458	0.0746451	1.38325	0.149907
BB1187		putative LuxR-family transcriptional regulator	transcription factor activity	Global Regulatory Functions	-2.49777	0.0257535	1.1819	0.0169706	negative	-3.32022	0	0
BB1188		HlyD-family secretion protein	protein transporter activity	transport	-1.30949	0.0511979	-1.32958	0.0919239
BB1189		probable ABC transporter	ATP-binding cassette (ABC) transporter activity	transport	-3.31966	0.0155084	-3.06218	NA	negative	-4.68183	0	0.0674045
BB1190		hypothetical protein		Unknown proteins, no known homologs	-4.03301	0.0149481	-1.14258	0.167584	negative	-5.3286	0	0.0581559
BB1191		putative outer membrane protein	transporter activity	transport	-3.92236	0.0129737	2.19416	0.144957	negative	-5.41106	0	0.0531889
BB1192		conserved hypothetical protein		Conserved in organism other than E. coli	-1.07195	0.104005	1.39509	0.0749533
BB1193	arsR	probable ArsR-family transcription regulator	transcription factor activity	Global Regulatory Functions	-1.20025	0.0454379	1.08376	0.0254558
BB1194	arsB, arsF	arsenical pump membrane protein	arsenite transporter activity		-1.23704	0.164916	-2.16285	0.160513
BB1195		putative exported protein		Periplasmic/ Exported/ Lipoprotein	-1.13666	0.0990179	-1.56972	0.00141421
BB1196		conserved hypothetical protein		metabolism	-1.2038	0.0141797	NA	NA
BB1197		hypothetical protein		Unknown proteins, no known homologs	-1.13669	0.0358668	-1.11879	0.103945
BB1198		putative TetR-family transcriptional regulator	transcription factor activity	regulation of transcription, DNA-dependent	-1.09146	0.0346343	-1.08143	0.00282843
BB1199		probable acyl-CoA dehydrogenase	acyl-CoA dehydrogenase activity	electron transport	-1.14356	0.0247937	NA	NA
BB1200		probable short-chain dehydrogenase	oxidoreductase activity	metabolism	-1.73977	0.0244318	1.60152	0.233345
BB1201	sugE	putative chaperone			-1.27254	0.12178	-1.97659	0.106066
BB1202		putative TetR-family transcriptional regulator	transcription factor activity	regulation of transcription, DNA-dependent	-1.27811	0.0822417	-1.8747	0.135057
BB1203		conserved hypothetical protein		Conserved in organism other than E. coli	-1.2049	0.0966414	-2.6443	NA
BB1204		LysR-family transcriptional regulator	transcription factor activity	Global Regulatory Functions	-1.33898	0.0757155	NA	NA
BB1205		hypothetical protein		Unknown proteins, no known homologs	-1.21677	0.0561532	1.1269	0.231931
BB1206		putative exported protein		Periplasmic/ Exported/ Lipoprotein	-1.26678	0.0243584	-1.1311	0.0367696
BB1207		putative plasmid-related protein	nucleotidyltransferase activity		1.20435	0.0869562	-1.07406	0.103945
BB1208		methyl-accepting chemotaxis protein	signal transducer activity	Chemotaxis, motility	-1.45244	0.0422666	NA	NA
BB1209		probable LysR-family transcriptional regulator	transcription factor activity	Global Regulatory Functions	-1.03052	0.0863851	-1.02028	0.0275772
BB1210		putative exported protein		Periplasmic/ Exported/ Lipoprotein	-1.03306	0.0832726	1.14636	0.0296985
BB1211		putative membrane protein	catalytic activity	metabolism	1.03885	0.0869086	1.2775	0.039598
BB1212		putative exported protein		Periplasmic/ Exported/ Lipoprotein	-1.19068	0.0872432	-2.09574	0.0806102
BB1213		putative membrane protein		Cell envelope	-1.15865	0.055296	-1.31406	0.205768
BB1214		putative exported protein		Periplasmic/ Exported/ Lipoprotein	1.33204	0.145433	1.3786	0.00494975
BB1215		probable thiamine pyrophosphate dependentenzyme		metabolism	-1.22834	0.0682127	-1.05583	0.0388909
BB1216		probable aldehyde dehydrogenase	oxidoreductase activity	metabolism	-1.00254	0.0680676	1.04695	0.0417193
BB1217		conserved hypothetical protein		metabolism	1.0768	0.110786	1.19416	0.0233345
BB1218		probable enoyl-CoA dehydratase	catalytic activity	metabolism	-1.25191	0.0507272	-1.71553	0.0410122
BB1219		LysR-family transcriptional regulator	transcription factor activity	Global Regulatory Functions	-1.15447	0.0603335	-1.14258	0.200111
BB1220		putative membrane protein		Cell envelope	-1.41661	0.0117509	-3.77636	NA
BB1221		hypothetical protein		Unknown proteins, no known homologs	-1.25261	0.0597071	-1.13273	0.0841457
BB1222		hypothetical protein		Unknown proteins, no known homologs	-1.16185	0.0518873	-1.04141	0.00282843
BB1223		putative acetyltransferase	N-acetyltransferase activity		-1.47153	0.05657	NA	NA
BB1224	aadA4	adenyltransferase	nucleotidyltransferase activity		-1.19216	0.0481433	-1.26824	0.0353553
BB1225		probable amidase	amidase activity		1.04748	0.0443388	1.25042	0.0622254
BB1226		putative membrane protein		Cell envelope	-1.4269	0.0905872	NA	NA
BB1227		putative membrane protein		Cell envelope	-1.06651	NA	NA	NA
BB1228		putative extracellular solute-binding protein		transport	1.05745	0.0720941	-1.10364	0.0749533
BB1229		2-hydroxychromene-2-carboxylate isomerase	protein disulfide oxidoreductase activity		-1.33393	0.0581012	NA	NA
BB1230		putative cyclase			-1.00448	0.0816347	-1.00297	0.0190919
BB1231		conserved hypothetical protein		Conserved in organism other than E. coli	-1.32682	0.117769	-3.08214	0.0586899
BB1232		conserved hypothetical protein		Conserved in organism other than E. coli	-1.50448	0.0689501	-3.05032	0.0813173
BB1233		conserved hypothetical protein		Conserved in organism other than E. coli	-1.60243	0.0553446	NA	NA
BB1234	ada	O6-methylguanine-DNA methyltransferase	transcription factor activity	Global Regulatory Functions	-1.49013	0.0300818	NA	NA
BB1235		DNA-3-methyladenine glycosylase 1	DNA binding	carbohydrate metabolism	-1.33727	0.0468589	-3.37714	NA
BB1236		putative glyxalase			-1.4951	0.110874	NA	NA
BB1237		putative phosphoesterase	hydrolase activity		-1.12773	0.0889054	-5.26503	0.0176777
BB1238	cioA, qxtA	cytochrome oxidase subunit I	oxidoreductase activity	electron transport	-1.02035	0.0585242	NA	NA
BB1239	cioB, qxtB	cytochrome oxidase subunit II		electron transport	-1.2316	0.03075	-3.06218	0.202233
BB1240		conserved hypothetical protein		Conserved in organism other than E. coli	-1.11463	0.0961141	-1.13436	0.0961665
BB1241		putative aminotransferase	transcription factor activity	regulation of transcription, DNA-dependent	-1.25214	0.0944358	-1.93137	NA
BB1242		hypothetical protein		Unknown proteins, no known homologs	-1.52462	0.13202	-2.55292	NA
BB1243	ttrA	tetrathionate reductase subunit A	oxidoreductase activity		1.00506	0.121825	1.36887	0.00141421
BB1244	ttrC	tetrathionate reductase subunit C			-1.02455	0.183568	1.01354	0.0509117
BB1245	ttrB	tetrathionate reductase subunit B	electron transporter activity	electron transport	-1.46815	0.0371065	NA	NA
BB1246		putative exported protein	calcium ion binding	Periplasmic/ Exported/ Lipoprotein	-1.83956	0.0300288	NA	NA
BB1247		putative hydrolase	hydrolase activity		-1.45926	0.0680732	NA	NA
BB1248	lon, lonD, bsgA	ATP-dependent protease La	ATP-dependent peptidase activity	Folding and Ushering	-1.33978	0.0448943	-3.50222	0.0558614
BB1249		heat shock protein	heat shock protein activity	Folding and Ushering	-1.0682	0.099159	-2.05208	NA
BB1250		putative membrane protein		Cell envelope	-1.16135	0.0386553	NA	NA
BB1251		putative exported protein		Periplasmic/ Exported/ Lipoprotein	-1.77301	0.0540135	-2.9403	NA
BB1252		LysR-family transcriptional regulator	transcription factor activity	Global Regulatory Functions	-1.00546	0.129036	NA	NA
BB1253		conserved hypothetical protein		Conserved in organism other than E. coli	-1.38834	0.109462	NA	NA
BB1254	add	adenosine deaminase	adenosine deaminase activity	purine ribonucleoside monophosphate biosynthesis	-1.02004	0.102355	1.3456	0.328805
BB1255		putative exported protein		Periplasmic/ Exported/ Lipoprotein	1.1204	0.144402	1.44332	0.0848528
BB1256		putative dimethylmenaquinone methyltransferase	methyltransferase activity		-1.11448	0.164059	-2.00169	0.267993
BB1257		conserved hypothetical protein		Conserved in organism other than E. coli	-1.01711	0.0611528	-1.21418	0.120915
BB1258		putative transcriptional regulator	DNA binding	regulation of transcription, DNA-dependent	-1.10528	0.0274183	-1.09749	0.10748
BB1259		putative 2-nitropropane dioxygenase	2-nitropropane dioxygenase activity	electron transport	-1.07367	0.0714889	1.04822	0.0339411
BB1260		probable LysR-family transcriptional regulator	transcription factor activity	Global Regulatory Functions	-1.19283	0.130983	-1.88517	NA
BB1261		putative membrane protein		Cell envelope	-1.79532	0.127706	-3.27424	NA
BB1262		probable AraC-family transcriptional regulator	transcription factor activity	Global Regulatory Functions	-1.09128	0.10828	-1.3068	0.109602
BB1263		putative lipoprotein	N-acetylglucosamine metabolism	metabolism	-1.43984	0.157295	-2.43711	0.0707107
BB1264		conserved hypothetical protein		Conserved in organism other than E. coli	1.01191	0.0438151	1.01523	0.173948
BB1265		conserved hypothetical protein		Conserved in organism other than E. coli	1.02441	0.0752132	-1.06295	0.101823
BB1266		conserved hypothetical protein		Conserved in organism other than E. coli	1.31686	0.0390569	1.00888	0.0799031
BB1267		conserved hypothetical protein		Conserved in organism other than E. coli	1.3118	0.12699	1.43528	0.125158
BB1268	ilvA	threonine dehydratase biosynthetic	threonine ammonia-lyase activity	isoleucine biosynthesis	-1.00119	0.0713635	NA	NA
BB1269		putative membrane protein		Cell envelope	-1.42973	0.0402583	1.01481	0.10253
BB1270		putative ArsR-family transcriptional regulator	transcription factor activity	Global Regulatory Functions	1.03066	0.0690924	-1.21605	0.0113137
BB1271		putative acyl-CoA dehydrogenase	acyl-CoA dehydrogenase activity	electron transport	-1.41304	0.125906	-1.8354	0.059397
BB1272		conserved hypothetical protein		Conserved in organism other than E. coli	-1.14796	0.038115	-2.4728	NA
BB1273		putative exported protein		Periplasmic/ Exported/ Lipoprotein	-1.11849	0.0624671	-1.16453	NA
BB1274		putative LysR-family transcriptional regulator	transcription factor activity	Global Regulatory Functions	-1.00021	0.157237	NA	NA
BB1275		putative racemase		metabolism	-1.29236	0.175657	-2.71412	0.0473762
BB1276		putative integral membrane protein	transporter activity	transport	1.04051	0.0912241	NA	NA
BB1277		putative LysR-family transcriptional regulator	transcription factor activity	Global Regulatory Functions	-1.51057	0.0523906	-4.34559	NA
BB1278		conserved hypothetical protein		Conserved in organism other than E. coli	1.04971	0.1135	-1.03684	0.114551
BB1279		conserved hypothetical protein		Conserved in organism other than E. coli	-1.01914	0.154535	-2.22389	0.0572756
BB1280		putative exported protein	S-adenosylmethionine-dependent methyltransferase activity	Periplasmic/ Exported/ Lipoprotein	1.46555	0.137342	-2.42213	0.0537401
BB1281		two component system sensor kinase	two-component sensor molecule activity	Global Regulatory Functions	-1.32186	0.0244696	-1.14981	0.039598
BB1282		two component system response regulator	two-component response regulator activity	Global Regulatory Functions	-1.01358	0.0508825	-1.51054	0.0756604
BB1283	cyoA	putative ubiquinol oxidase polypeptide II	copper ion binding	electron transport	2.50975	0.515799	-2.18081	0.0848528	positive	2.46187	0	0
BB1284	cyoB	ubiquinol oxidase polypeptide I	cytochrome-c oxidase activity	electron transport	3.09451	0.670158	-2.19092	0.0487904	positive	2.61986	0	0
BB1285	cyoC	cytochrome O ubiquinol oxidase	cytochrome-c oxidase activity	electron transport	2.87647	0.839608	-4.08997	NA	positive	1.39339	0	6.7268
BB1286	cyoD	cytochrome 0 ubiquinol oxidase			2.57771	0.55411	-3.64253	0.0417193	positive	2.00639	0	0
BB1287		putative regulatory protein	transcription factor activity	Global Regulatory Functions	-1.85147	0.0826936	-2.51222	0.150614
BB1288		putative transport protein	transporter activity	transport	-1.03544	0.0565	-5.79412	NA
BB1289		putative integral membrane protein		Cell Envelope	1.35467	0.09129	1.13706	0.0890955
BB1290		conserved hypothetical protein		Conserved in organism other than E. coli	2.89106	1.28082	NA	NA
BB1291		conserved hypothetical protein		Conserved in organism other than E. coli	3.26031	0.866242	-1.28758	0.0226274	positive	2.96556	0	0
BB1292		putative exported protein		Periplasmic/ Exported/ Lipoprotein	34.6724	8.28929	-37.5238	0.00353553	positive	7.56302	0	0
BB1293		putative lipoprotein		Periplasmic/ Exported/ Lipoprotein	-1.46729	0.114587	NA	NA
BB1294	bfrG	putative TonB-dependent receptor	receptor activity	transport	-1.05495	0.0641487	1.01269	0.0381838
BB1295		putative exported protein		Periplasmic/ Exported/ Lipoprotein	-1.0943	0.0612844	1.07868	0.046669
BB1296		putative chromate transport protein	chromate transporter activity	chromate transport	-1.41096	0.0928273	-1.36018	NA
BB1297		putative lipoprotein	metalloendopeptidase activity	Folding and Ushering	-1.52324	0.0828736	-2.38547	0.0629325
BB1298		conserved hypothetical protein		Conserved in organism other than E. coli	-1.23921	0.0417761	-3.36273	0.0813173
BB1299		putative exported protein		Periplasmic/ Exported/ Lipoprotein	-1.14288	0.0859478	-1.11247	0.0997021
BB1300		conserved hypothetical protein		Conserved in organism other than E. coli	-1.08214	0.078667	-1.39059	NA
BB1301		putative exported protein		Periplasmic/ Exported/ Lipoprotein	1.20643	0.0607245	1.04526	0.0431335
BB1302		putative RNA polymerase sigma factor	transcription factor activity	Global Regulatory Functions	1.01875	0.0916226	-1.2635	0.0968736
BB1303		conserved hypothetical protein		Conserved in organism other than E. coli	1.43593	0.271232	1.54399	0.14425
BB1304		conserved hypothetical protein		Conserved in organism other than E. coli	-1.16467	0.0254509	-2.67421	NA
BB1305		putative oxidoreductase	oxidoreductase activity	metabolism	-1.32682	0.0344973	-1.21169	0.129401
BB1306		exported SurF1-family protein		Periplasmic/ Exported/ Lipoprotein	-1.40506	0.0222711	-1.59514	NA
BB1307		cytochrome ubiquinol oxidase subunit IV			-1.4465	0.0331677	NA	NA
BB1308		cytochrome ubiquinol oxidase subunit III	cytochrome-c oxidase activity	electron transport	-1.34273	0.097445	-3.18598	0.046669
BB1309		cytochrome ubiquinol oxidase subunit I	cytochrome-c oxidase activity	electron transport	1.15508	0.0444978	1.02834	0.144957
BB1310		putative ubiquinol oxidase subunit II	cytochrome-c oxidase activity	electron transport	-1.2729	0.104667	-3.71698	NA
BB1311		putative membrane transport protein	transporter activity	transport	1.04197	0.0832548	-1.03457	0.0205061
BB1312		conserved hypothetical protein		Conserved in organism other than E. coli	-1.11131	0.0545482	-1.22234	0.00424264
BB1313		putative amino-acid dehydratase	amino acid metabolism	metabolism	-1.27399	0.129	NA	NA
BB1314		putative membrane protein		Cell envelope	-1.38679	0.0420823	-1.92822	NA
BB1315		putative universal stress protein		Folding and Ushering	-1.17465	0.0978889	1.30245	0.026163
BB1316		putative chromate transporter	chromate transporter activity	transport	-1.54887	0.100933	-3.47137	0.0869741
BB1317		putative chromate transporter	chromate transporter activity	transport	-1.36955	0.0337951	-2.59211	0.155563
BB1318		conserved hypothetical protein	S-adenosylmethionine-dependent methyltransferase activity	Conserved in organism other than E. coli	-1.31359	0.0485	NA	NA
BB1319	fdsD	putative NAD-dependent formate dehydrogenasedelta subunit	oxidoreductase activity	metabolism	-1.66952	0.0578163	NA	NA
BB1320	fdhD, fdsC	formate dehydrogenase associated protein	formate dehydrogenase activity	electron transport	-1.45056	0.0684156	-4	0.053033
BB1321	fdsA	NAD-dependent formate dehydrogenase alphasubunit	electron transporter activity	electron transport	-1.27981	0.0986174	-1.99662	0.0678823
BB1322	fdsB	NAD-dependent formate dehydrogenase betasubunit	NADH dehydrogenase (ubiquinone) activity	mitochondrial electron transport, NADH to ubiquinone	-1.31436	0.0833291	-2.52564	NA
BB1323	fdsG	NAD-dependent formate dehydrogenase gammasubunit	NADH dehydrogenase (ubiquinone) activity	mitochondrial electron transport, NADH to ubiquinone	-1.10274	0.0632913	-2.04498	NA
BB1324		putative molybdenum-binding protein	transcription factor activity	Global Regulatory Functions	1.05298	0.0755484	1.1011	0.113844
BB1325	moaA	molybdenum cofactor biosynthesis protein	catalytic activity		1.04569	0.0833583	-1.11932	0.0735391
BB1326	moeA	molybdopterin cofactor biosynthesis protein		Mo-molybdopterin cofactor biosynthesis	-1.1365	0.0296498	-1.29251	0.0968736
BB1327	moaB	molybdenum cofactor biosynthesis protein		Mo-molybdopterin cofactor biosynthesis	1.01384	0.0652848	-1.23705	0.231224
BB1328	moaE	molybdopterin converting factor		Mo-molybdopterin cofactor biosynthesis	-1.2062	0.1214	-1.25611	0.0240416
BB1329	moaD	molybdopterin converting factor		sulfur metabolism	-1.42509	0.0578709	NA	NA
BB1330	moaC	molybdenum cofactor biosynthesis protein		Mo-molybdopterin cofactor biosynthesis	-1.06617	0.103527	1.0791	0.0304056
BB1331		putative exported protein		Periplasmic/ Exported/ Lipoprotein	-1.35803	0.0449695	-3.27424	NA
BB1332		putative hydrolase	hydrolase activity		-1.44061	0.047876	-2.48842	NA
BB1333		putative lipoprotein		Periplasmic/ Exported/ Lipoprotein	-1.10601	0.0889808	-2.20935	NA
BB1334		AhpC			-1.17309	0.0405975	NA	NA
BB1335		putative membrane transport protein	transporter activity	transport	1.01816	0.117297	-1.03775	0.0820244
BB1336		putative exported protein		Periplasmic/ Exported/ Lipoprotein	-1.99525	0.0172548	NA	NA	negative	-2.49194	0	0
BB1337		biotin synthase	biotin biosynthesis	metabolism	1.09406	0.266722	1.35279	0.0622254
BB1338		putative exported protein		Periplasmic/ Exported/ Lipoprotein	-1.85035	0.0811526	-1.10416	0.22981
BB1339		putative exported protein		Periplasmic/ Exported/ Lipoprotein	-1.45888	0.0449829	-1.1021	0.156271
BB1340		putative TetR-family transcriptional regulator	transcription factor activity	Global Regulatory Functions	-1.86328	NA	NA	NA
BB1341		carboxyvinyl-carboxyphosphonatephosphorylmutase	carboxyvinyl-carboxyphosphonate phosphorylmutase activity	metabolism	NA	NA	NA	NA
BB1342	acnA, acn	aconitate hydratase	RNA binding	metabolism	-1.521	0.0629449	NA	NA
BB1343		dihydroorotase-like protein	allantoinase activity		-1.02471	0.164857	1.14636	0.148492
BB1344		probable hydrolase	hydrolase activity	metabolism	-1.44906	0.108285	-5.66906	0.0940452
BB1345		conserved hypothetical protein		Conserved in organism other than E. coli	-1.08275	0.0265153	-2.05565	NA
BB1346		putative exported protein		Periplasmic/ Exported/ Lipoprotein	1.09272	0.0577914	-1.16339	0.0692965
BB1347		putative fumarate reductase flavoproteinsubunit	succinate dehydrogenase activity	electron transport	-1.08231	0.121739	NA	NA
BB1348		putative exported protein		Periplasmic/ Exported/ Lipoprotein	1.23158	0.259045	1.24281	0.0523259
BB1349		putative exported protein		Periplasmic/ Exported/ Lipoprotein	-1.23684	0.0492916	-1.39387	NA
BB1350		conserved hypothetical protein		Conserved in organism other than E. coli	-1.01068	0.100868	1.0681	0.231224
BB1351		probable GntR-family transcriptional regulator	transcription factor activity	Global Regulatory Functions	-1.20672	0.0810539	1.22504	0.059397
BB1352		putative aldo			1.00685	0.0410863	-2.33597	NA
BB1353	lnt, cutE	putative apolipoprotein N-acyltransferase	N-acyltransferase activity	nitrogen metabolism	-1.09279	0.0494375	-1.7306	0.0254558
BB1354	corC	magnesium and cobalt efflux protein			-1.04706	0.0260969	-1.00297	0.0459619
BB1355		conserved hypothetical protein		Conserved in organism other than E. coli	-1.55245	0.146352	-1.56556	0.00565685
BB1356		PhoH-like protein	ATP binding	cellular response to phosphate starvation	-1.2252	0.0988035	-1.62698	0.0968736
BB1357		conserved hypothetical protein		Conserved in organism other than E. coli	1.0768	0.13424	-1.6214	0.00282843
BB1358		putative membrane protein		Cell envelope	-1.42836	0.095595	NA	NA
BB1359	secF	protein-export membrane protein	protein translocase activity	transport	-1.02128	0.137146	-1.34014	NA
BB1360	secD	protein-export membrane protein	protein translocase activity	transport	1.08662	0.0929779	-1.05442	0.200818
BB1361		putative secreted protein			1.05135	0.084272	-1.00767	0.0692965
BB1362	tgt	queuine tRNA-ribosyltransferase	queuine tRNA-ribosyltransferase activity	translation	-1.08162	0.292142	-2.86893	0.0296985
BB1363	queA	S-adenosylmethionine:tRNAribosyltransferase-isomerase	transferase activity	translation	1.07855	0.121669	NA	NA
BB1364		probable D-alanyl-D-alanine carboxypeptidase	serine carboxypeptidase activity	proteolysis and peptidolysis	1.15464	0.0609399	-1.71927	0.0784889
BB1366	prn	pertactin precursor	protein binding	cell adhesion	1.11773	0.124411	NA	NA
BB1366	upp, uraP	uracil phosphoribosyltransferase	uracil phosphoribosyltransferase activity	uracil salvage	-1.01526	0.0881306	-2.28627	0.00707107
BB1367	cysG	siroheme synthase	uroporphyrin-III C-methyltransferase activity	porphyrin biosynthesis	1.34782	0.221135	NA	NA
BB1368		putative membrane protein		Cell envelope	1.08431	0.0944911	NA	NA
BB1369		putative membrane protein		Cell envelope	-1.22901	0.0544123	1.10998	0.0183848
BB1370		putative membrane protein		Cell envelope	1.03438	0.0996044	1.02453	0.176777
BB1371		hypothetical protein		Unknown proteins, no known homologs	-1.14362	0.128345	-1.46832	0.108894
BB1372	ubiD	3-octaprenyl-4-hydroxybenzoate carboxy-lyase	lyase activity		-1.02283	0.0948843	NA	NA
BB1373		putative transglycosylase			1.23352	0.0792291	1.06853	0.0367696
BB1374		probable aminotransferase	transaminase activity	biosynthesis	1.00551	0.045	-5.37273	NA
BB1375		conserved hypothetical protein		Conserved in organism other than E. coli	1.50201	0.178414	1.28003	0.079196
BB1376	maeB	NADP-dependent malic enzyme	malate dehydrogenase (oxaloacetate-decarboxylating) (NADP+) activity	metabolism	-1.2453	0.0800982	-1.12571	NA
BB1377		conserved hypothetical protein	catalytic activity	Conserved in organism other than E. coli	-1.24454	0.0220055	-1.66479	NA
BB1378		conserved hypothetical protein		Conserved in organism other than E. coli	-1.3039	0.0394389	-1.60816	0.0226274
BB1379		conserved hypothetical protein		Conserved in organism other than E. coli	-1.09448	0.0553266	-1.00467	0.026163
BB1380	tktA, tkt	transketolase 1	transketolase activity		-1.20715	0.0488594	-1.11932	0.00707107
BB1381	gap, hexC	glyceraldehyde-3-phosphate dehydrogenase	glycolysis	metabolism	-1.34407	0.0396597	1.46954	0.0254558
BB1382	pgk	phosphoglycerate kinase	glycolysis	metabolism	-1.08739	0.0489499	-1.0563	0.00141421
BB1383	fabI, envM	enoyl-[acyl-carrier-protein] reductase [NADH]	enoyl-[acyl-carrier protein] reductase (NADH) activity	metabolism	-1.12189	0.120724	-1.23318	0.253851
BB1384	ackA, ack	acetate kinase	acetate kinase activity	organic acid metabolism	1.07858	0.163442	-1.81149	0.0360624
BB1385		phosphate acetyl	acyltransferase activity	metabolism	1.30659	0.0891169	-1.21045	0.0176777
BB1386		conserved hypothetical protein		Conserved in organism other than E. coli	1.22116	0.0792013	-1.02073	0.0537401
BB1387		probable glutathione S-transferase	transferase activity		1.13142	0.0708844	1.06303	0.00636396
BB1388		conserved hypothetical protein		Conserved in organism other than E. coli	1.50004	0.228572	-1.2918	0.0325269
BB1389		conserved hypothetical protein		Conserved in organism other than E. coli	-1.20976	0.129353	-1.92822	0.0692965
BB1390		putative acetyltransferase	N-acetyltransferase activity		1.18217	0.070024	-1.71802	0.0113137
BB1391	cbpA	curved DNA-binding protein	DNA binding	Folding and Ushering	-1.28103	0.0322422	-1.61807	0.111016
BB1392		conserved hypothetical protein		Conserved in organism other than E. coli	1.00521	0.0423868	1.10533	0.177484
BB1393		putative membrane protein		transport	-1.41155	0.115898	-2.81429	0.0113137
BB1394		putative membrane protein		Cell envelope	-2.21202	0.142186	-3.43605	0.00141421	negative	-1.62855	0	3.34532
BB1395	pitA, pit	probable phosphate transporter	inorganic phosphate transporter activity	transport	-1.30466	0.168375	-2.88293	NA
BB1396	mog, mogA, chlG	molybdopterin biosynthesis protein		Mo-molybdopterin cofactor biosynthesis	-1.00134	0.0554861	1.04484	0.059397
BB1397		putative exported protein		Periplasmic/ Exported/ Lipoprotein	-1.03688	0.0402335	1.26396	0.0311127
BB1398		putative peptidase	metalloendopeptidase activity	proteolysis and peptidolysis	1.18961	0.0319598	1.13029	0.159806
BB1399		hypothetical protein		Unknown proteins, no known homologs	1.00283	0.0504612	-1.1703	0.132936
BB1400	infA	translation initiation factor IF-1	RNA binding	translation	-1.19811	0.0381424	-1.03051	0.186676
BB1401		conserved hypothetical protein	carbon-sulfur lyase activity	metabolism	-1.41482	0.0359548	-7.57692	NA
BB1402		formate dehydrogenase	formate dehydrogenase activity	L-serine biosynthesis	-1.47784	0.0347788	NA	NA
BB1403		conserved hypothetical protein		Conserved in organism other than E. coli	-1.42654	0.0523179	-2.76168	NA
BB1404		putative transporter protein		transport	-1.16649	0.0954942	-2.05208	0.0367696
BB1405	fmdA	formamidase	formamidase activity	metabolism	-1.53647	0.139809	-3.83766	0.0735391
BB1406		putative LuxR-family transcriptional regulator	transcription factor activity	Global Regulatory Functions	-1.146	0.138584	-2.15301	NA
BB1407		conserved hypothetical protein		Conserved in organism other than E. coli	-1.87138	0.0617759	-1.07699	0.0756604
BB1408	fba, fda, cbbA	fructose-bisphosphate aldolase	fructose-bisphosphate aldolase activity	metabolism	-1.11593	0.0520517	1.41497	0.0756604
BB1409		conserved hypothetical protein	carbon-sulfur lyase activity	metabolism	-1.10285	0.07407	-1.2989	0.0749533
BB1410	purC	phosphoribosylaminoimidazole-succinocarboxamidesynthase	phosphoribosylaminoimidazolesuccinocarboxamide synthase activity	purine nucleotide biosynthesis	-1.06651	0.0492869	-1.15261	0.0431335
BB1411		conserved hypothetical protein		Conserved in organism other than E. coli	-1.07884	0.0715854	-1.35395	0.223446
BB1412		putative DNA-binding protein	DNA binding	Global Regulatory Functions	-1.47891	0.050863	-1.2173	0.114551
BB1413		putative membrane protein		Cell envelope	-1.31642	0.0556008	-1.12144	0.00282843
BB1414		putative membrane protein		Cell envelope	-1.35028	0.0326381	-1.14813	0.00777817
BB1415	purE	phosphoribosylaminoimidazole carboxylasecatalytic subunit	phosphoribosylaminoimidazole carboxylase activity	'de novo' IMP biosynthesis	-1.29585	0.0318438	NA	NA
BB1416	purK	phosphoribosylaminoimidazole carboxylase ATPasesubunit	phosphoribosylaminoimidazole carboxylase activity	'de novo' IMP biosynthesis	-1.27471	0.0514676	-1.90492	0.195869
BB1417		conserved hypothetical protein		Conserved in organism other than E. coli	-1.45056	0.102934	-2.30859	0.0636396
BB1418		putative extracellular solute-binding protein	transporter activity	transport	-1.06313	0.0587711	1.24154	0.143543
BB1419		putative transcriptional regulator	DNA binding	regulation of transcription, DNA-dependent	-1.14339	0.12596	NA	NA
BB1420		putative arginase	catalytic activity		2.70353	0.182679	-4.23656	0.0311127	positive	4.37383	0	0.0284948
BB1421		putative amino acid-binding periplasmic protein	transporter activity	transport	-1.21986	0.100107	NA	NA
BB1422		putative inner membrane component ofbinding-protein-dependent transport system	transporter activity	transport	1.30659	0.193144	1.39594	0.0650538
BB1423		putative ATP-binding component of ABCtransporter	ATP-binding cassette (ABC) transporter activity	transport	1.32862	0.241071	1.35618	0.0523259
BB1424		putative thiamine-pyrophosphate-requiringenzyme		metabolism	-1.28828	0.153348	1.03765	0.0685894
BB1425		conserved hypothetical protein	oxidoreductase activity	metabolism	-1.41931	0.103116	NA	NA
BB1426	gcdH	glutaryl-CoA dehydrogenase	glutaryl-CoA dehydrogenase activity	electron transport	-1.22744	0.0849214	NA	NA
BB1427	ilvG	putative acetolactate synthase large subunit	acetolactate synthase activity		-1.28237	0.0505493	-2.82775	0.0905097
BB1428		probable LysR-familyt ranscriptional regulator	transcription factor activity	Global Regulatory Functions	-1.78374	0.0681083	-4.91476	0.0388909
BB1429	xerD, xprb	integrase	DNA binding	DNA recombination	-1.05322	0.066333	NA	NA
BB1430		conserved hypothetical protein		Conserved in organism other than E. coli	1.10135	0.127027	1.16074	0.0212132
BB1431		conserved hypothetical protein	hydrolase activity, acting on glycosyl bonds		1.69519	0.145918	-1.80734	0.0410122
BB1432		conserved hypothetical protein		Conserved in organism other than E. coli	1.19286	0.186434	-2.52026	NA
BB1433	pbpG	probable D-alanyl-D-alanine carboxypeptidase	serine carboxypeptidase activity	proteolysis and peptidolysis	-1.12471	0.0330471	NA	NA
BB1434		hypothetical protein		Unknown proteins, no known homologs	1.21759	0.286366	1.36041	0.210718
BB1435		putative membrane protein	transporter activity	transport	-1.25507	0.113107	-6.12435	NA
BB1436		conserved hypothetical protein		Conserved in organism other than E. coli	-1.43937	0.0643752	NA	NA
BB1437		putative nuclease	DNA binding	DNA repair	-1.73618	0.128723	NA	NA
BB1438	dnaX, dnaZ, dnazX	DNA polymerase III subunit Tau	nucleotide binding	DNA replication	-1.19428	0.0740066	-1.33862	0.0523259
BB1439		conserved hypothetical protein		Conserved in organism other than E. coli	-1.34299	0.0700963	-2.24288	NA
BB1440	recR	recombination protein RecR	nucleic acid binding	DNA repair	-1.0188	0.0327642	-1.11509	0.138593
BB1441		conserved hypothetical protein		metabolism	-1.03993	0.0455693	-1.43099	0.0763675
BB1442		putative exported protein		Periplasmic/ Exported/ Lipoprotein	-1.5065	0.0881981	NA	NA
BB1443		probable ATP-binding ABC transporter protein	ATP-binding cassette (ABC) transporter activity	transport	1.04033	0.120414	1.04399	0.0424264
BB1444		probable transmembrane permease ABC transporterprotein	transporter activity	transport	-1.17178	0.0538589	NA	NA
BB1445	talB	transaldolase B	pentose-phosphate shunt	metabolism	-1.13554	0.0627707	1.022	0.0565685
BB1446	carA, pyrA	carbamoyl-phosphate synthase small chain	carbamoyl-phosphate synthase (glutamine-hydrolyzing) activity	nitrogen metabolism	-1.06973	0.0810898	1.03173	0.00636396
BB1447	carB, pyrA	carbamoyl-phosphate synthase large chain	IMP cyclohydrolase activity	purine nucleotide biosynthesis	1.1021	0.151988	1.24323	0.129401
BB1448		probable short chain dehydrogenase	oxidoreductase activity	metabolism	-1.25205	0.101934	-1.20428	0.0459619
BB1449	gpmB	probable phosphoglycerate mutase 2	phosphoglycerate mutase activity	metabolism	-1.21216	0.0717865	-1.2377	0.190919
BB1450		LysR-family transcriptional regulator	transcription factor activity	Global Regulatory Functions	-1.28954	0.0715371	-1.22741	0.0127279
BB1451		probable ATP-binding component of ABCtransporter	ATP-binding cassette (ABC) transporter activity	transport	-2.18079	0.153052	-3.41618	0.110309	negative	-1.6601	0	2.91498
BB1452		probable permease component of ABC transporter	transporter activity	transport	-1.19182	0.142225	NA	NA
BB1453		putative regulatory lipoprotein	transporter activity	transport	-1.51295	0.0927705	-1.5451	0.0537401
BB1455		putative xanthine	transporter activity	transport	-1.22924	0.0672681	-1.68376	0.246073
BB1456		methyl-accepting chemotaxis protein	signal transducer activity	Chemotaxis, motility	1.10284	0.0655052	-2.01706	0.0424264
BB1457	greA	transcription elongation factor	DNA binding	Global Regulatory Functions	-1.00224	0.0647511	1.04695	0.205768
BB1458		conserved hypothetical protein		Conserved in organism other than E. coli	-1.40683	0.0353836	-1.4512	0.0544472
BB1459	rrmJ, ftsJ, mrsF	ribosomal RNA large subunit methyltransferase j	methyltransferase activity		1.00372	0.0392832	NA	NA
BB1460	ftsH, hflB, mrsC, tolZ	cell division protein	metalloendopeptidase activity	cytokinesis	1.18753	0.0287036	1.25465	0.16122
BB1461	folP, dhpS	dihydropteroate synthase	dihydropteroate synthase activity	folic acid and derivative biosynthesis	1.01658	0.173055	-1.75762	0.16617
BB1462	mrsA	phosphoglucomutase	intramolecular transferase activity, phosphotransferases	carbohydrate metabolism	1.04681	0.125219	-1.3857	0.0268701
BB1463		conserved hypothetical protein		Conserved in organism other than E. coli	-1.0838	0.0239352	-1.05677	0.092631
BB1464	ppx	exopolyphosphatase	exopolyphosphatase activity		-1.01235	0.201278	1.03469	0.0254558
BB1465	ppk	polyphosphate kinase	polyphosphate kinase activity	polyphosphate biosynthesis	-1.02137	0.0822147	-1.33409	0.0141421
BB1466	pstS, phoS	phosphate-binding periplasmic protein precursor	transporter activity	transport	-1.49112	0.0754078	1.19205	0.131522
BB1467	pstC, phoW	phosphate transport system permease protein	inorganic phosphate transporter activity	phosphate transport	-1.12886	0.032	NA	NA
BB1468	pstA, phoT	phosphate transport system permease protein	inorganic phosphate transporter activity	phosphate transport	-1.0778	0.175001	-2.81429	NA
BB1469	pstB, phoT	phosphate transport ATP-binding protein	ATP-binding cassette (ABC) transporter activity	phosphate transport	-1.08275	0.210389	NA	NA
BB1470		conserved hypothetical protein	catalytic activity	Conserved in organism other than E. coli	-1.03881	0.162096	NA	NA
BB1471		putative exported protein		Periplasmic/ Exported/ Lipoprotein	-1.03592	0.091	-7.2963	NA
BB1472		conserved hypothetical protein		Conserved in organism other than E. coli	1.39187	0.041347	1.01227	0.0120208
BB1473		putative oxidoreductase	oxidoreductase activity		-1.12508	0.0262395	1.05795	0.0799031
BB1474		putative DNA-binding protein	DNA binding		-1.23443	0.0698615	-1.34471	0.0989949
BB1475		putative exported protein		Periplasmic/ Exported/ Lipoprotein	-1.22253	0.025606	-1.41897	0.0919239
BB1476		Putative gluconate dehydrogenase		metabolism	-1.18647	0.0395115	-1.13218	0.183848
BB1477		Putative cytochrome C precursor	alcohol dehydrogenase activity	electron transport	-1.04821	0.0485515	1.15186	0.195869
BB1478		Putative carbonic anhydrase precursor	carbonate dehydratase activity	carbon utilization	-1.30112	0.0354633	-1.63485	0.0282843
BB1479		Putative regulatory protein	transcription factor activity	Global Regulatory Functions	-1.1726	0.0819504	-1.54308	0.0523259
BB1480	gbd	NAD-dependent 4-hydroxybutyrate dehydrogenase	iron ion binding	metabolism	-1.38024	0.165741	1.44036	0.275065
BB1481		Putative ketoglutarate semialdehydedehydrogenase	phenylacetaldehyde dehydrogenase activity	metabolism	-1.34488	0.141465	-1.70809	NA
BB1482		Hypothetical protein		Unknown proteins, no known homologs	-1.12584	0.0651371	1.43739	0.217789
BB1483		Hypothetical protein		Unknown proteins, no known homologs	1.18053	0.105218	1.36294	0.183848
BB1484		Putative branched-chain amino acid transporterATP-binding protein	ATP-binding cassette (ABC) transporter activity	transport	1.11654	0.0528764	1.10998	0.0268701
BB1485		Putative branched-chain amino acid transporterATP-binding protein	ATP-binding cassette (ABC) transporter activity	transport	-1.02808	0.0155958	NA	NA
BB1486		Putative high-affinity branched-chain amino acidtransporter membrane protein	transporter activity	transport	-1.7355	0.141819	NA	NA
BB1487		Putative branched-chain amino acid transportermembrane protein	transporter activity	transport	-1.07161	0.0988602	-1.48679	0.0113137
BB1488		Putative branched-chain amino acid transportersubstrate binding protein		transport	-1.08485	0.0957639	-1.21856	0.0636396
BB1489		Putative high-affinity branched-chain amino acidtransporter ATP-binding protein	ATP-binding cassette (ABC) transporter activity	transport	-1.20154	0.119093	-1.65084	NA
BB1490		Putative branched-chain amino acid transporterATP-binding protein	ATP-binding cassette (ABC) transporter activity	transport	-1.0119	0.0419036	1.13536	0.127279
BB1491		Putative high-affinity branched-chain amino acidtransporter membrane protein	transporter activity	transport	-1.14036	0.124192	-2.12781	0.0502046
BB1492		Putative high-affinity branched-chain amino acidtransporter membrane protein	transporter activity	transport	1.04941	0.103466	-1.13763	0.00989949
BB1493		Putative branched-chain amino acid transportersubstrate-binding protein		transport	1.12279	0.194888	-2.03793	0.0183848
BB1494		conserved hypothetical protein		Conserved in organism other than E. coli	-1.14766	0.0794097	-2.16881	NA
BB1495		Putative transcriptional regulator	DNA binding	regulation of transcription, DNA-dependent	1.16401	0.0363582	-1.23834	0.144957
BB1496		Putative short chain dehydrogenase	oxidoreductase activity	metabolism	-1.01324	0.178059	-1.55834	0.0233345
BB1497		putative exported protein		Periplasmic/ Exported/ Lipoprotein	-1.31528	0.0633385	-1.56453	0.119501
BB1498		Putative hydrolase	hydrolase activity	metabolism	-1.35409	0.0242453	-1.60816	0.0622254
BB1499		Putative monoxygenase	monooxygenase activity	electron transport	-1.45433	0.0343681	-1.75893	NA
BB1500		Putative 3-hydroxybutyryl-CoA dehydrogenase	oxidoreductase activity	metabolism	-1.24599	0.0221937	-2.50424	NA
BB1501		Putative enoyl-CoA hydratase	catalytic activity	metabolism	-1.41691	0.0295439	-1.95857	0.146371
BB1502		Putative L-carnitine dehydrogenase-like protein		metabolism	-1.25284	0.0973004	-1.90492	0.0954594
BB1503		Putative ABC transport system, solute-bindingprotein		transport	-1.09039	0.164322	-1.7408	NA
BB1504		Putative ABC transport system, permease protein	transporter activity	transport	-1.02455	0.0298105	1.12056	0.168999
BB1505		Putative ABC transport system, permease protein	transporter activity	transport	-1.45859	0.0426153	NA	NA
BB1506		Putative ABC transport system, ATP-bindingprotein	ATP-binding cassette (ABC) transporter activity	transport	-1.03497	0.0896211	1.16878	0.0813173
BB1507		Putativa ABC transport system, ATP-bindingprotein	ATP-binding cassette (ABC) transporter activity	transport	-1.22924	0.0315478	-1.79227	0.135057
BB1508		Putative amidase	amidase activity		-1.05247	0.0960663	-1.01765	0.238295
BB1509		Conserved hypothetical protein		Conserved in organism other than E. coli	1.02099	0.0392239	-1.17378	0.066468
BB1510		Putative GntR-family transcriptional regulator	transcription factor activity	Global Regulatory Functions	-1.42563	0.0568763	-1.83256	NA
BB1511		Conserved hypothetical protein		Conserved in organism other than E. coli	-1.11371	0.0408377	-1.06391	0
BB1512		probable short chain dehydrogenase	oxidoreductase activity	metabolism	-1.29723	0.0297304	NA	NA
BB1513		probable short chain dehydrogenase	oxidoreductase activity	metabolism	-1.21282	0.0309824	-1.61586	0.0756604
BB1514		Putative ABC transport system, membrane protein		transport	-1.06837	0.179526	-1.67541	0.0615183
BB1515		Putative ABC transport system, membrane protein		transport	-1.10328	0.0425261	-1.0849	0.026163
BB1516		Putative ABC transport system, solute-bindingprotein		transport	1.04524	0.0534395	-1.02073	0.141421
BB1517		Hypothetical protein		Unknown proteins, no known homologs	-1.04187	0.0130676	-1.19093	0.132229
BB1518		Putative hydrolase	hydrolase activity	metabolism	1.10909	0.0390094	-1.04834	0.0544472
BB1519		Putative GntR-family transcriptional regulator	transcription factor activity	Global Regulatory Functions	1.16371	0.0911473	1.05584	0.0367696
BB1520		Putative AsnC-family transcriptional regulator	transcription factor activity	Global Regulatory Functions	-1.20607	0.0604493	-1.576	NA
BB1521		Putative diaminopropionate ammonia-lyase	amino acid metabolism	metabolism	-1.41274	0.0814071	-1.74723	0.00494975
BB1522		Putative peptidase	metallopeptidase activity	proteolysis and peptidolysis	-1.54566	0.0449342	-5.00847	NA
BB1523		Putative ABC transport system, substrate-bindingprotein	transporter activity	transport	-1.16266	0.136167	1.03723	0.111723
BB1524		Putative ABC transport system, integral membraneprotein	transporter activity	transport	-1.52358	0.0415909	NA	NA
BB1525		Putative ABC transport system, integral membraneprotein	transporter activity	transport	-1.42872	0.130926	-3.68799	0.129401
BB1526		Putative ABC transport system, ATP-bindingprotein	ATP-binding cassette (ABC) transporter activity	transport	-1.18878	0.0495496	-3.01531	NA
BB1527		Putative membrane protein		Cell envelope	-1.05545	0.0885487	-1.21605	NA
BB1528		Putative amino acid aminotransferase			-1.24058	0.068515	-2.25573	NA
BB1529		Putative dehydrogenase	oxidoreductase activity, acting on the CH-OH group of donors, NAD or NADP as acceptor	metabolism	-1.32472	0.0295541	NA	NA
BB1530		Putative amino acid hydrolase	metallopeptidase activity	proteolysis and peptidolysis	-1.78697	0.155011	NA	NA
BB1531		Putative decarboxylase	racemase and epimerase activity, acting on amino acids and derivatives	metabolism	-1.20867	0.0746506	1.10406	0.22486
BB1532		putative aldolase	aldolase activity	metabolism	-1.17733	0.0356047	1.1764	0.0304056
BB1533		putative creatinine amidohydrolase	hydrolase activity		-1.25191	0.0571351	-1.21045	0.125158
BB1534		putative exported protein		Periplasmic/ Exported/ Lipoprotein	-1.5789	0.0180941	NA	NA
BB1535		putative exported protein		Periplasmic/ Exported/ Lipoprotein	-1.06482	0.0468933	1.09645	0.172534
BB1536		Putative LysR-family transcriptional regulator	transcription factor activity	Global Regulatory Functions	-1.28299	0.0436535	-1.39223	0.00282843
BB1537		putative exported protein		Periplasmic/ Exported/ Lipoprotein	-1.13229	0.0484589	-1.03684	0.00707107
BB1538		Putative membrane protein	cation transporter activity	potassium ion transport	1.0067	0.0506956	-1.04463	0.0601041
BB1539		Putative LysR-family transcriptional regulator	transcription factor activity	Global Regulatory Functions	1.17517	0.13162	1.31134	0.00565685
BB1540		Hypothetical protein		Unknown proteins, no known homologs	-1.01114	0.120304	-1.06104	0.0141421
BB1541		Putative transferase	transferase activity		-1.12302	0.088446	1.10702	0.153442
BB1542	metC	cystathionase beta-lyase	amino acid metabolism	metabolism	-1.19491	0.041596	-1.39551	NA
BB1543		Conserved hypothetical protein	hydrolase activity, acting on ester bonds	metabolism	-1.57908	0.100096	NA	NA
BB1544		putative exported protein		Periplasmic/ Exported/ Lipoprotein	-1.49844	0.192028	NA	NA
BB1545	bisC	Putative biotin sulfoxide reductase	oxidoreductase activity	electron transport	-1.26136	0.152965	NA	NA
BB1546		Conserved hypothetical protein	hydrolase activity, acting on carbon-nitrogen (but not peptide) bonds	nitrogen metabolism	1.07784	0.0394229	NA	NA
BB1547		Putative amino acid ABC transport system,ATP-binding protein	ATP-binding cassette (ABC) transporter activity	transport	1.07382	0.0895	NA	NA
BB1548		Putative amino acid ABC transport system,ATP-binding protein	ATP-binding cassette (ABC) transporter activity	transport	1.17517	0.007	NA	NA
BB1549		Putative amino acid ABC transport system,membrane protein	transporter activity	transport	-1.09662	0.0844541	1.10956	0.00494975
BB1550		Putative amino acid ABC transport system,membrane protein	transporter activity	transport	-1.01766	0.11089	NA	NA
BB1551		Putative amino acid ABC transport system,substrate-binding protein		transport	1.12762	0.10378	NA	NA
BB1552		Putative exported protein		Periplasmic/ Exported/ Lipoprotein	NA	NA	NA	NA
BB1553		Hypothetical protein		Unknown proteins, no known homologs	-1.34974	0.102089	NA	NA
BB1554		Putative UDP-N-acetylglucosamine1-carboxyvinyltransferase	transferase activity		-1.17568	0.0155	NA	NA
BB1555		Conserved hypothetical protein		Conserved in organism other than E. coli	1.41033	0.120894	1.27538	0.170413
BB1556		ABC transporter, ATP-binding protein	ATP-binding cassette (ABC) transporter activity	transport	1.46108	0.0238711	1.77665	0.0919239
BB1557	tpm	thiopurine S-methyltransferase	thiopurine S-methyltransferase activity		-1.38365	0.0408344	-1.2429	NA
BB1558	vir-18	vir-repressed protein			-1.36191	0.0393602	NA	NA
BB1559		putative exported protein		Periplasmic/ Exported/ Lipoprotein	-1.35123	0.0170459	1.03765	0.0304056
BB1560		putative lipoprotein		Periplasmic/ Exported/ Lipoprotein	1.10775	0.0315819	1.17386	0.258094
BB1561		conserved hypothetical protein		Conserved in organism other than E. coli	-1.70382	0.0311645	1.21743	0.0622254
BB1562		putative phospholipase			-1.23773	0.248768	NA	NA
BB1563		probable aldehyde dehydrogenase	oxidoreductase activity	metabolism	1.09168	0.0407973	NA	NA
BB1564		putative exported protein	catalytic activity, signal transduction	signal transduction	NA	NA	NA	NA
BB1565		conserved hypothetical protein		Conserved in organism other than E. coli	-1.01228	0.1343	NA	NA
BB1566		biotin carboxyl carrier protein	acetyl-CoA carboxylase activity	fatty acid biosynthesis	-1.01251	0.0290545	NA	NA
BB1567		probable carboxylase			1.07159	0.078	NA	NA
BB1568		conserved hypothetical protein		Conserved in organism other than E. coli	1.10671	0.0582224	1.26988	0.0707107
BB1569		conserved hypothetical protein	aminocarboxymuconate-semialdehyde decarboxylase activity	metabolism	1.01019	0.0500106	NA	NA
BB1570		conserved hypothetical protein		Conserved in organism other than E. coli	-1.1964	NA	NA	NA
BB1571		GntR-family transcriptional regulator	transcription factor activity	Global Regulatory Functions	-1.19854	0.0321265	NA	NA
BB1572	accC, fabG	biotin carboxylase	biotin carboxylase activity	metabolism	-1.09359	0.113186	NA	NA
BB1573		putative acyl-CoA carboxylase	biotin carboxylase activity		1.10314	0.0744028	1.09391	0.110309
BB1574		Putative biotinylated protein			1.07516	0.113534	-1.38977	0.0120208
BB1575		Putative acetyl-CoA synthetase			1.00086	0.109521	-1.76682	NA
BB1576		Conserved hypothetical protein		Conserved in organism other than E. coli	1.22935	0.0495222	1.00761	0.0410122
BB1577		Putative solute-binding protein		transport	1.23605	0.0735851	1.18486	0.00212132
BB1578		Putative membrane protein		Cell envelope	-1.04001	0.0856255	NA	NA
BB1579		Putative membrane protein		Cell envelope	1.03922	0.0317106	NA	NA
BB1580		Putative membrane protein	transporter activity	transport	1.35481	0.202199	1.67682	0.00848528
BB1581		Putative reductase	disulfide oxidoreductase activity	electron transport	-1.30822	0.0294222	NA	NA
BB1582		Hypothetical protein		Unknown proteins, no known homologs	1.03788	0.052988	-1.20612	NA
BB1583		Putative decarboxylase	lyase activity	aromatic compound metabolism	-1.16165	0.0557315	-1.93453	NA
BB1584		Putative LysR-family transcriptional regulator	transcription factor activity	regulation of transcription, DNA-dependent	-1.1176	0.0361432	NA	NA
BB1585		putative membrane protein		Cell envelope	1.01265	0.0787136	NA	NA
BB1586	ndoA, pahA2	Putative ferredoxin	oxidoreductase activity	metabolism	1.00164	0.066538	-1.13164	0.00353553
BB1587		Putative oxygenase	catalytic activity	metabolism	1.10374	0.0740023	-2.17279	NA
BB1588		Putative cyclodeaminase			1.28858	0.0954072	1.15144	0.0848528
BB1589		Putative dioxygenase	oxidoreductase activity, acting on single donors with incorporation of molecular oxygen, incorporation of two atoms of oxygen		-1.31005	0.124292	-3.40634	NA
BB1590		Putative dioxygenase (small subunit)	oxidoreductase activity, acting on single donors with incorporation of molecular oxygen, incorporation of two atoms of oxygen	electron transport	1.18232	0.0924862	1.02961	0.25173
BB1591		Putative oxygenase (large subunit)	iron ion binding	electron transport	NA	NA	-2.20935	NA
BB1592		Putative ABC transport system, substrate-bindingprotein		transport	-1.01958	0.195895	NA	NA
BB1593		Putative ABC transport system, membrane protein	transporter activity	transport	NA	NA	NA	NA
BB1594		Putative ABC transport system, membrane protein	transporter activity	transport	1.01801	0.0576411	-1.86582	0.0318198
BB1595		Putative ABC transport system, ATP-bidningprotein	ATP-binding cassette (ABC) transporter activity	transport	-1.02081	0.0823242	1.15694	0.013435
BB1596		Putative ABC transport system, ATP-bindingprotein	ATP-binding cassette (ABC) transporter activity	transport	-1.07195	0.0375292	-1.06295	0.00707107
BB1597		Putative oxidoreductase	oxidoreductase activity	metabolism	-1.0927	0.0597084	-1.0884	0.212132
BB1598		Putative glutamyltransferase	gamma-glutamyltransferase activity		-1.14502	0.160433	-2.66216	NA
BB1599		putative exported protein		Periplasmic/ Exported/ Lipoprotein	-1.17107	0.0321983	NA	NA
BB1600		Putative GntR-family transcriptional regulator	transcription factor activity	Global Regulatory Functions	1.20777	0.0967074	1.26565	0.0749533
BB1601		Putative membrane protein		Cell envelope	-1.19871	0.0573493	NA	NA
BB1602		Conserved hypothetical protein		Conserved in organism other than E. coli	1.1245	0.024787	NA	NA
BB1603		Putative exported protein		Periplasmic/ Exported/ Lipoprotein	1.14615	0.0712964	-1.21169	0.135057
BB1604		Putative exported protein		Periplasmic/ Exported/ Lipoprotein	1.16878	0.0150873	-1.10934	0.153442
BB1605		putative exported protein		Periplasmic/ Exported/ Lipoprotein	NA	NA	NA	NA
BB1606		Putative oxidoreductase	oxidoreductase activity	electron transport	NA	NA	NA	NA
BB1607		Putative LysR-family transcriptional regulator	transcription factor activity	Global Regulatory Functions	-1.56839	NA	NA	NA
BB1608		hypothetical protein		Unknown proteins, no known homologs	2.60887	0.23887	NA	NA	positive	3.75729	0	0
BB1609	bscF	putative type III secretion protein		TTSS	2.59161	0.308575	-1.29039	0.202233	positive	3.64747	0	0
BB1610	bscE	hypothetical protein		Unknown proteins, no known homologs	11.8727	3.43497	-6.18848	NA	positive	4.37674	0	0.0291018
BB1611	bscD	putative type III secretion protein		TTSS	1.27296	0.0811302	-1.11826	0.0848528
BB1612	bcrD	putative type III secretion pore protein		TTSS	3.16744	NA	NA	NA
BB1613		conserved hypothetical protein		Conserved in organism other than E. coli	2.78144	0.630285	NA	NA	positive	2.30103	0	0
BB1614		conserved hypothetical protein		Conserved in organism other than E. coli	1.96309	0.415314	NA	NA	positive	1.89237	0	0.222498
BB1615		hypothetical protein		Unknown proteins, no known homologs	1.90318	0.403343	-3.41618	0.079196	positive	1.41313	0	6.34718
BB1616	bopN	putative outer protein N		TTSS	3.50826	0.808989	NA	NA	positive	2.8883	0	0
BB1617	bsp22	putative secreted protein		TTSS	1.8028	0.119764	-2.68027	0.0113137
BB1618		hypothetical protein		Unknown proteins, no known homologs	1.28698	0.184186	NA	NA
BB1619	bcrH1	putative regulatory protein		Global Regulatory Functions	1.25123	0.164677	-1.21856	NA
BB1620	bopD	putative outer protein D		TTSS	2.9238	0.511629	NA	NA	positive	3.03382	0	0
BB1621	bopB	putative outer protein B		TTSS	1.35898	0.168704	-1.36175	NA
BB1622	bcrH2	putative regulatory protein		Global Regulatory Functions	3.21905	0.478348	NA	NA	positive	4.14972	0	0
BB1623	bcr4	hypothetical protein		Unknown proteins, no known homologs	3.459	0.677169	NA	NA	positive	3.33708	0	0
BB1624	bscI	putative type III secretion protein		TTSS	1.34574	0.139297	1.12606	0.101823
BB1625	bscJ	putative type III secretion protein		TTSS	1.10775	0.127553	NA	NA
BB1626	bscK	conserved hypothetical protein		Conserved in organism other than E. coli	1.38949	0.104099	NA	NA
BB1627	bscL	putative type III secretion protein		TTSS	2.23203	0.232558	NA	NA	positive	3.63596	0	0
BB1628	bscN	putative ATP synthase in type III secretionsystem	ATP binding	TTSS	1.25912	0.072386	NA	NA
BB1629	bscO	putative type III secretion protein		TTSS	NA	NA	NA	NA
BB1630	bscP	hypothetical protein		Unknown proteins, no known homologs	1.18232	0.241936	NA	NA
BB1631	bscQ	putative type III secretion protein		TTSS	1.00506	0.136458	-1.10261	0.0325269
BB1632	bscR	putative type III secretion protein	type III protein (virulence-related) secretor activity	TTSS	-1.03179	0.115221	1.05753	0.0452548
BB1633	bscS	putative type III secretion protein		TTSS	-1.02081	0.0450204	NA	NA
BB1634	bscT	putative type III secretion protein		TTSS	NA	NA	NA	NA
BB1635	bscU	putative type III secretion protein		TTSS	-1.02019	0.0712047	NA	NA
BB1636	bscW	hypothetical protein		Unknown proteins, no known homologs	1.16133	0.106294	1.11929	0.0325269
BB1637	bscC	putative type III secretion protein		protein secretion	1.64422	0.376009	NA	NA
BB1638	brpL	putative RNA polymerase sigma factor	transcription factor activity	Global Regulatory Functions	1.32326	0.120153	NA	NA
BB1639		hypothetical protein		Unknown proteins, no known homologs	2.2932	0.244369	NA	NA	positive	3.43173	0	0
BB1640		hypothetical protein	glutamate-cysteine ligase activity	glutathione biosynthesis	1.26075	0.181032	1.51946	0.0678823
BB1641		putative exported protein		Periplasmic/ Exported/ Lipoprotein	NA	NA	NA	NA
BB1642		putative regulator	catalytic activity	Global Regulatory Functions	NA	NA	NA	NA
BB1643		putative inner membrane transport protein	transporter activity	transport	1.13201	0.0604437	1.23562	0.0247487
BB1644	alr, dadB	alanine racemase, catabolic	alanine racemase activity	metabolism	1.52969	NA	NA	NA
BB1645		putative anti-sigma factor	ATP binding	Global Regulatory Functions	-1.02831	0.0549994	1.09349	0.36416
BB1646		putative anti-sigma factor antagonist		Global Regulatory Functions	1.4145	0.0353034	NA	NA
BB1647		putative phospholipase	catalytic activity	metabolism	1.28189	0.0015	NA	NA
BB1648		putative acetyltransferase	N-acetyltransferase activity		1.00193	0.063	NA	NA
BB1649	bapA	autotransporter		transport	1.25153	0.0610485	1.2132	0.243245
BB1650		hypothetical protein		Unknown proteins, no known homologs	1.10016	0.079824	1.13494	0.342947
BB1651		hypothetical protein		Unknown proteins, no known homologs	1.02739	0.0785	NA	NA
BB1652		hypothetical protein		Unknown proteins, no known homologs	1.56392	0.166704	NA	NA
BB1653		putative membrane protein		Cell envelope	1.17808	0.0675023	-1.71678	0.033234
BB1654		conserved hypothetical protein		Conserved in organism other than E. coli	-1.14444	0.0535389	-1.36647	0.0339411
BB1655		conserved hypothetical protein	metalloendopeptidase activity	proteolysis and peptidolysis	1.02575	0.0307014	1.08545	0.0367696
BB1656	dapA	dihydrodipicolinate synthase			1.35318	0.0700046	-1.19454	0.053033
BB1657		putative lipoprotein		Periplasmic/ Exported/ Lipoprotein	1.2295	0.0179377	-1.15317	0.0777817
BB1658	fim3	serotype 3 fimbrial subunit precursor		cell adhesion	3.43816	0.74708	-4.06885	0.000707107	positive	3.33197	0	0
BB1659		conserved hypothetical protein		Conserved in organism other than E. coli	1.01667	0.0631368	NA	NA
BB1660	mutS	mismatch repair protein	damaged DNA binding	mismatch repair	1.08841	0.069198	-1.10778	NA
BB1661		integrase	DNA binding	DNA recombination	1.4328	0.0521592	1.2132	0.108894
BB1662		phage-related hypothetical protein		Laterally acquired elements	-1.01711	0.037081	NA	NA
BB1663		phage-related conserved hypothetical protein		Laterally acquired elements	1.18485	0.0272243	1.13283	0
BB1664		phage-related putative membrane protein		Laterally acquired elements	1.58	0.0418295	1.3676	0.00353553
BB1665		phage-related putative exported protein		Laterally acquired elements	1.11802	0.050486	NA	NA
BB1666		phage-related hypothetical protein		Laterally acquired elements	NA	NA	NA	NA
BB1667		phage-related hypothetical protein		Laterally acquired elements	-1.01711	0.0372089	NA	NA
BB1668		modification methylase	DNA binding	DNA methylation	1.18708	0.100487	1.2132	0.137179
BB1669		putative methyltransferase	methyltransferase activity		1.21893	0.0653962	1.24281	0.10748
BB1670		phage-related hypothetical protein		Laterally acquired elements	-1.06448	0.03	NA	NA
BB1671		phage-related hypothetical protein		Laterally acquired elements	-2.92385	NA	NA	NA
BB1672		phage-related hypothetical protein		Laterally acquired elements	1.23084	0.0725785	1.17047	0.0190919
BB1673		phage-related hypothetical protein		Laterally acquired elements	1.32296	0.16469	-1.17378	0.0608112
BB1674		phage-related conserved hypothetical protein		Laterally acquired elements	1.04234	0.0685327	NA	NA
BB1675		phage-related hypothetical protein		Laterally acquired elements	1.09615	0.074817	NA	NA
BB1676		phage-related putative membrane protein		Laterally acquired elements	1.3377	0.092459	-1.43796	0.169706
BB1677		phage-related hypothetical protein		Laterally acquired elements	-1.01235	0.0585488	-1.05914	0.182434
BB1678		putative phage repressor	DNA binding	proteolysis and peptidolysis	1.05618	0.111218	-1.19394	0.0834386
BB1679		phage-related conserved hypothetical protein		Laterally acquired elements	1.02009	0.0469188	-1.12571	0.0551543
BB1680		phage-related hypothetical protein		Laterally acquired elements	-1.8695	0.0545185	-1.07162	0.0919239
BB1681		phage-related hypothetical protein		Laterally acquired elements	1.08275	0.0729926	1.08672	0.0685894
BB1682		phage-related hypothetical protein		Laterally acquired elements	1.08275	0.040796	1.24323	0.033234
BB1683		phage-related hypothetical protein		Laterally acquired elements	1.27072	0.0494591	-1.02872	0.0763675
BB1684		phage-related hypothetical protein		Laterally acquired elements	1.09949	0.0852735	-1.576	NA
BB1685		phage-related hypothetical protein		Laterally acquired elements	-1.02659	0.202128	NA	NA
BB1686		phage-related conserved hypothetical protein		Laterally acquired elements	1.35571	0.152602	1.51861	0.0353553
BB1687		phage-related hypothetical protein		Laterally acquired elements	1.13834	0.158941	NA	NA
BB1688		phage-related conserved hypothetical protein		Laterally acquired elements	1.11267	0.0945191	1.30457	0.114551
BB1689		phage-related conserved hypothetical protein		Laterally acquired elements	-1.08476	0.107435	1.05034	0.0714178
BB1690		phage-related putative endonuclease	nucleic acid binding	Laterally acquired elements	-1.55966	NA	-4.90456	NA
BB1691		phage-related hypothetical protein		Laterally acquired elements	-1.04952	0.0829538	NA	NA
BB1692		terminase			-1.19768	0.0357048	NA	NA
BB1693		portal protein			-1.03115	0.089203	NA	NA
BB1694		phage-related Clp protease	endopeptidase Clp activity	Folding and Ushering	1.14586	0.0904306	1.11083	0.140007
BB1695		major head protein			-1.05313	0.0301968	1.26861	0.0714178
BB1696		phage-related hypothetical protein		Laterally acquired elements	1.02768	0.0542435	1.11929	0.121622
BB1697		phage-related conserved hypothetical protein		Laterally acquired elements	1.07323	0.0991539	1.34349	0.137179
BB1698		phage-related conserved hypothetical protein		Laterally acquired elements	-1.18626	0.104006	NA	NA
BB1699		phage-related hypothetical protein		Laterally acquired elements	1.22503	0.0365472	-1.05914	0.00424264
BB1700		phage-related hypothetical protein		Laterally acquired elements	1.47239	0.189607	-1.04417	0.0311127
BB1701		phage-related conserved hypothetical protein		Laterally acquired elements	-1.05769	0.0551881	NA	NA
BB1702		phage-related conserved hypothetical protein		Laterally acquired elements	-1.63798	0.0831792	NA	NA
BB1703		phage-related hypothetical protein		Laterally acquired elements	-1.32173	0.1513	NA	NA
BB1704		phage-related hypothetical protein		Laterally acquired elements	-1.19005	NA	NA	NA
BB1705		phage-related putative exported protein		Laterally acquired elements	-1.04625	0.0549501	-1.32958	NA
BB1706		putative tail component of prophage		Laterally acquired elements	1.05123	0.116864	-1.18794	0.0212132
BB1707		phage-related hypothetical protein		Laterally acquired elements	1.17026	0.0483382	1.16201	0.143543
BB1708		phage-related hypothetical protein		Laterally acquired elements	1.24736	0.113194	1.36591	0.0516188
BB1709		phage-related hypothetical protein		Laterally acquired elements	1.04926	0.0711163	1.27073	0.0763675
BB1710		phage-related hypothetical protein		Laterally acquired elements	1.07739	0.0025	NA	NA
BB1711		phage-related putative exported protein		Laterally acquired elements	-1.40653	0.125401	-2.49367	NA
BB1712		phage-related hypothetical protein		Laterally acquired elements	1.41643	0.241115	1.54188	0.0346482
BB1713		phage-related putative membrane protein		Laterally acquired elements	-1.0075	0.124323	-1.11509	0.0721249
BB1714		phage-related hypothetical protein		Laterally acquired elements	-1.45433	0.100777	NA	NA
BB1715		phage-related putative exported protein		Laterally acquired elements	1.00521	0.0893829	-1.09953	0.141421
BB1716		phage-related hypothetical protein		Laterally acquired elements	-1.05347	0.0501215	NA	NA
BB1717		phage-related conserved hypothetical protein		Laterally acquired elements	-1.1423	0.0283074	NA	NA
BB1718		conserved hypothetical protein		Conserved in organism other than E. coli	1.13053	0.0358376	1.16582	0.140007
BB1719		putative chromate reductase			-1.2115	0.0867278	-1.03684	0.205061
BB1720		putative membrane protein		Cell envelope	-1.19897	0.0548483	NA	NA
BB1721		putative exported protein		Periplasmic/ Exported/ Lipoprotein	-3.47235	0.0354558	1.78511	NA	negative	-3.89954	0	0
BB1722		conserved hypothetical protein		Conserved in organism other than E. coli	-1.44681	0.0232379	NA	NA
BB1723		putative exported protein		Periplasmic/ Exported/ Lipoprotein	-1.16005	0.0737517	-1.06968	0.00565685
BB1724		putative exported protein		Periplasmic/ Exported/ Lipoprotein	1.19705	0.18322	1.65228	0.0579828
BB1725		putative membrane protein		Cell envelope	-1.6444	0.012	NA	NA
BB1726		putative transcriptional regulator	DNA binding	regulation of transcription, DNA-dependent	-1.41572	0.0605736	NA	NA
BB1727		putative exported protein		Periplasmic/ Exported/ Lipoprotein	-2.65994	0.0298077	1.15694	0.116673	negative	-2.55826	0	0
BB1728		probable methyltransferase	RNA binding	RNA processing	-1.20834	0.0334325	NA	NA
BB1729	suhB, ssyA	inositol-1-monophosphatase, probable inositol monophosphatase	inositol/phosphatidylinositol phosphatase activity		-1.23602	0.0333676	NA	NA
BB1730		putative membrane protein		Cell envelope	-1.17137	0.0318617	NA	NA
BB1731	bacA	bacitracin resistance protein	undecaprenol kinase activity	response to antibiotic	1.12576	0.0961581	NA	NA
BB1732	lpxH	UDP-2,3-diacylglucosamine hydrolase	hydrolase activity, acting on acid anhydrides, in phosphorus-containing anhydrides	lipid A biosynthesis	-1.0356	0.0680057	-1.36332	0.137179
BB1733	ppiB	peptidyl-prolyl cis-trans isomerase B	isomerase activity	protein folding	-1.09895	0.108339	1.45474	0.152028
BB1734		putative exported protein		Periplasmic/ Exported/ Lipoprotein	1.19036	0.220573	1.37775	0.0318198
BB1735	cysS	cysteinyl-tRNA synthetase	cysteine-tRNA ligase activity	translation	1.01555	0.0864064	NA	NA
BB1736		DNA-3-methyladenine glycosylase, DNA binding	carbohydrate metabolism	metabolism	1.24989	0.229033	1.6544	0.135057
BB1737	accA	acetyl-coenzyme A carboxylase carboxyltransferase subunit alpha	acetyl-CoA carboxylase activity	fatty acid biosynthesis	-1.04074	0.0269815	-1.4775	0.00424264
BB1738		conserved hypothetical protein		Conserved in organism other than E. coli	-1.00119	0.0468375	NA	NA
BB1739	ask	aspartokinase	amino acid biosynthesis	metabolism	-1.07332	0.115937	1.0681	0.0487904
BB1740		conserved hypothetical protein		Conserved in organism other than E. coli	-1.1763	0.007	NA	NA
BB1741		conserved hypothetical protein		Conserved in organism other than E. coli	1.05998	0.103752	NA	NA
BB1742		putative 3-hydroxyacyl-CoA dehydrogenase	oxidoreductase activity	fatty acid metabolism	1.07233	0.108363	1.12056	0.0601041
BB1743		putative membrane protein		Cell envelope	-1.00299	0.0297677	1.19247	0.00212132
BB1744		putative membrane protein		Cell envelope	1.17227	0.0431651	NA	NA
BB1745		putative exported protein		transport	1.12963	0.0350771	1.1747	0.053033
BB1746	bioH	putative hydrolase	hydrolase activity		1.25376	0.089	NA	NA
BB1747		putative exported protein		Periplasmic/ Exported/ Lipoprotein	1.16691	0.0679306	NA	NA
BB1748		probable short chain dehydrogenase	oxidoreductase activity	metabolism	1.18076	0.112486	NA	NA
BB1749		probable TetR-family transcriptional regulator	transcription factor activity	Global Regulatory Functions	1.07449	0.0529927	NA	NA
BB1750		LysR-family transcriptional regulator	transcription factor activity	Global Regulatory Functions	1.05864	0.0445805	-1.10364	NA
BB1751		putative extracellular solute-binding protein			-1.1462	0.006	NA	NA
BB1752		conserved hypothetical protein	N-acetylglucosamine-6-phosphate deacetylase activity	N-acetylglucosamine metabolism	-1.05149	0.098	NA	NA
BB1753		putative ABC transporter, permease protein	transporter activity	transport	1.02533	0.104816	NA	NA
BB1754		putative ABC transporter, permease protein	transporter activity	transport	1.09853	0.114016	1.10745	0.168291
BB1755		probable ATP-binding component of ABCtransporter	ATP-binding cassette (ABC) transporter activity	transport	-1.00977	0.0418485	1.1912	NA
BB1756		probable NADH-dependent flavin oxidoreductase	oxidoreductase activity	metabolism	1.08588	0.0661085	NA	NA
BB1757		probable transcriptional regulator	DNA binding	regulation of transcription, DNA-dependent	1.05596	0.1965	NA	NA
BB1758		putative pimeloyl-CoA synthetase			1.14839	0.0933417	NA	NA
BB1759		putative exported protein		Periplasmic/ Exported/ Lipoprotein	1.20911	0.0698152	1.2022	0.0622254
BB1760		conserved hypothetical protein		Conserved in organism other than E. coli	1.10448	0.0798997	1.19628	0.130108
BB1761		conserved hypothetical protein	oxidoreductase activity	metabolism	-1.09359	0.0435373	NA	NA
BB1762		hypothetical protein		Unknown proteins, no known homologs	-1.31849	0.0420648	NA	NA
BB1763		hypothetical protein		Unknown proteins, no known homologs	1.08543	0.0705709	-1.95533	0.0360624
BB1764		putative ArsR-family transcriptional regulator	transcription factor activity	Global Regulatory Functions	-1.25051	0.148954	NA	NA
BB1765	nemA	N-ethylmaleimide reductase	oxidoreductase activity	electron transport	-1.20958	0.0876581	NA	NA
BB1766	bpsD	putative membrane protein		Cell envelope	-1.09172	0.0447183	NA	NA
BB1767	bpsC	putative glycosyl transferase component of heminstorage system	transferase activity		1.49948	0.13046	1.56472	0.0629325
BB1768	bpsB	putative hemin storage protein	hydrolase activity, acting on carbon-nitrogen (but not peptide) bonds	carbohydrate metabolism	1.02843	0.198084	NA	NA
BB1769	bpsA	putative hemin storage protein			-1.03616	0.067443	NA	NA
BB1770		putative membrane protein		Cell envelope	1.00521	0.113029	1.20347	0.0841457
BB1771		MarR-family transcriptional regulator	transcription factor activity	regulation of transcription, DNA-dependent	-1.00637	0.0278609	-2.69248	NA
BB1772		branched-chain amino acid-binding protein			-1.28716	0.160941	NA	NA
BB1773		putative permease component of branched-chainamino acid transport system	transporter activity	transport	-1.16558	0.0632908	NA	NA
BB1774		putative ATP-binding component of branched-chainamino acid ABC transporter	ATP-binding cassette (ABC) transporter activity	transport	-1.05844	0.0639935	-1.21981	0.0226274
BB1775		putative ATP-binding component of ABCtransporter	ATP-binding cassette (ABC) transporter activity	transport	-1.21227	0.00922293	-2.20935	NA
BB1776		putative cytochrome	alcohol dehydrogenase activity	electron transport	-1.10307	0.0458207	1.09095	0.140714
BB1777		probable oxidoreductase	electron transporter activity	electron transport	1.02456	0.0585119	1.14255	0.0784889
BB1778		putative monooxygenase	monooxygenase activity	aromatic compound metabolism	1.23701	0.0750881	NA	NA
BB1779	maiA	maleate cis-trans isomerase		metabolism	1.16297	0.125437	1.26142	0.0268701
BB1780		probable alpha			1.19705	0.0372234	1.20643	0.192333
BB1781		conserved hypothetical protein		Conserved in organism other than E. coli	1.09406	0.068036	1.10914	0.0212132
BB1782		putative isochorismatase			1.21298	0.0786264	1.00296	0.0869741
BB1783		probable aldehyde dehydrogenase	oxidoreductase activity	electron transport	-1.00886	0.0590805	-2.24288	NA
BB1784		putative flavocytochrome	oxidoreductase activity	electron transport	-1.11389	0.115762	-1.03231	NA
BB1785	bfrI	putative ferrisiderophore receptor	receptor activity	transport	-1.47385	0.0646362	1.52961	0.335169
BB1786		putative transcriptional regulator	transcription factor activity	Global Regulatory Functions	-1.21194	0.0291748	NA	NA
BB1787		putative exported protein		Periplasmic/ Exported/ Lipoprotein	-1.12622	0.0719257	-1.03322	0.128693
BB1788		putative sulfatase	sulfuric ester hydrolase activity	metabolism	-1.33512	0.0519974	NA	NA
BB1789	fadD, oldD	long-chain-fatty-acid--CoA ligase	long-chain-fatty-acid-CoA ligase activity	metabolism	-1.09608	0.0309814	-1.59407	0.0176777
BB1790		Conserved hypothetical protein		Conserved in organism other than E. coli	-1.11741	0.0497831	-1.12679	0.0636396
BB1791		putative acetyl-CoA acyltransferase (thiolase)protein	acyltransferase activity		-1.11454	0.0402127	NA	NA
BB1792		Putative 3-hydroxyacyl-CoA dehydrogenaseoxidoreductase	oxidoreductase activity	metabolism	-1.21942	0.0253162	-1.2989	NA
BB1793		Putative fatty acid transport system, membraneprotein			-1.15955	0.1049	NA	NA
BB1794		Putative enoyl-CoA hydratasee	enoyl-CoA hydratase activity	fatty acid metabolism	-1.18777	0.0365724	-1.03503	0.0113137
BB1795		Putative thiolase	acetyl-CoA C-acyltransferase activity		-1.09075	0.0484401	-1.1611	0.11738
BB1796		Putative acyl-CoA dehydrogenase	acyl-CoA dehydrogenase activity	electron transport	-1.26013	0.018123	NA	NA
BB1797		Putative TetR-family regulatory protein	transcription factor activity	Global Regulatory Functions	-1.01734	0.0542638	-1.61255	NA
BB1798		Putative luxR-family regulatory protein	transcription factor activity	Global Regulatory Functions	-1.439	0.0355491	-1.09495	0.0106066
BB1799		putative LuxR-family transcriptional regulator	two-component response regulator activity	Global Regulatory Functions	-1.70058	0.0985	NA	NA
BB1800	pgm	phosphoglucomutase, phosphomannomutase activity	carbohydrate metabolism	metabolism	-1.17015	0.0788818	1.1709	0.059397
BB1801	pgi	putative glucose-6-phosphate isomerase	glucose-6-phosphate isomerase activity	metabolism	-1.22386	0.0188282	-1.68616	NA
BB1802	srpH	serine acetyltransferase	serine O-acetyltransferase activity		1.05596	0.046177	-1.10778	0.0141421
BB1803		putative membrane protein	transporter activity	transport	1.00908	0.126691	NA	NA
BB1804		putative Sir2-like regulatory protein	DNA binding	chromatin silencing	1.00783	0.0866491	NA	NA
BB1805		putative inositol monophosphatase	inositol/phosphatidylinositol phosphatase activity		-1.01849	0.0631858	-1.00553	0.0148492
BB1806	gabD	succinate-semialdehyde dehydrogenase [NADP+]	succinate-semialdehyde dehydrogenase [NAD(P)+] activity	metabolism	-1.04527	0.0833181	1.36887	0.0282843
BB1807	goaG	4-aminobutyrate aminotransferase	4-aminobutyrate transaminase activity	metabolism	-1.0078	0.0473669	-1.0765	0.00989949
BB1808		probable GntR-family transcriptional regulator	transcription factor activity	Global Regulatory Functions	-1.0258	0.0450257	1.10533	0.502753
BB1809		conserved hypothetical protein		Conserved in organism other than E. coli	-1.1022	0.01	NA	NA
BB1810		probable ATP-dependent DNA helicase	DNA binding	DNA repair	-1.41274	0.0493468	NA	NA
BB1811		putative magnesium transporter	metal ion transporter activity	transport	-1.73955	0.0258984	NA	NA
BB1812		putative nuclease	nucleic acid binding		-1.22957	0.0328465	NA	NA
BB1813		putative extracellular solute-binding protein	transporter activity	transport	-1.35376	0.0459221	NA	NA
BB1814		putative oligopeptide transport system permeaseprotein	transporter activity	transport	-1.11899	0.0754899	NA	NA
BB1815		putative oligopeptide transport integralmembrane protein	transporter activity	transport	-1.17568	0.0055	NA	NA
BB1816		putative ABC transporter, ATP-binding protein	ATP-binding cassette (ABC) transporter activity	transport	1.0253	0.113919	1.10575	0.265872
BB1817		probable MarR-family transcriptional regulator	transcription factor activity	Global Regulatory Functions	-1.3651	0.148828	NA	NA
BB1818		putative membrane protein		Cell envelope	-1.30924	0.0298682	NA	NA
BB1819		putative exported protein		Periplasmic/ Exported/ Lipoprotein	-1.48077	0.0382914	-1.00639	0.0431335
BB1820		putative membrane protein		Cell envelope	1.16818	0.259071	1.59095	0.1393
BB1821		putative membrane protein		Cell envelope	-1.51904	0.121984	2.29442	0.405879
BB1822		putative membrane protein	cysteine-type peptidase activity	proteolysis and peptidolysis	-1.15645	0.0839153	1.28638	0.143543
BB1823		putative exported protein		Periplasmic/ Exported/ Lipoprotein	-2.87875	0.0450019	NA	NA	negative	-3.44172	0	0
BB1824		putative exported protein		Periplasmic/ Exported/ Lipoprotein	-2.37253	0.0438596	NA	NA	negative	-2.15386	0	0
BB1825		putative membrane protein	ice binding	homoiothermy	1.17369	0.188329	-1.01372	0.059397
BB1826		putative type II secretion system protein		protein secretion	1.07903	0.0674743	-1.05961	0.157685
BB1827		conserved hypothetical protein	two-component response regulator activity	Global Regulatory Functions	-2.4504	0.007	NA	NA
BB1828		probable type II secretion system protein	ATP binding	transport	-1.42472	0.0690014	NA	NA
BB1829		putative membrane protein		Cell Envelope	-2.45174	0.0792458	NA	NA	negative	-2.68169	0	0
BB1830		putative membrane protein		protein secretion	-1.37639	0.083367	NA	NA
BB1831		putative lipoprotein		Periplasmic/ Exported/ Lipoprotein	-2.23223	0.0682113	NA	NA	negative	-2.41638	0	0
BB1832		putative exported protein		Periplasmic/ Exported/ Lipoprotein	-1.13435	0.0938884	1.23266	0.159806
BB1833		putative exported protein		Periplasmic/ Exported/ Lipoprotein	-1.05471	0.0158028	NA	NA
BB1834		putative response regulator	nucleotide binding	Global Regulatory Functions	1.00863	0.0677956	NA	NA
BB1835		putative lipoprotein		Periplasmic/ Exported/ Lipoprotein	-1.59862	0.0633463	1.2242	0.0381838
BB1836		conserved hypothetical protein		Conserved in organism other than E. coli	-1.04878	0.032066	-1.12304	0.0360624
BB1837		putative ECF-family RNA polymerase sigma factor	transcription factor activity	Global Regulatory Functions	1.10329	0.0821619	1	0.152735
BB1838		putative exported protein		Periplasmic/ Exported/ Lipoprotein	1.05944	0.156214	NA	NA
BB1839		putative cytochrome c	electron transporter activity	electron transport	-1.06129	0.0597162	1.34814	0.0445477
BB1840	efp	putative elongation factor P	translation elongation factor activity	translation	1.48311	0.039119	-1.17846	0.059397
BB1841		conserved hypothetical protein		Conserved in organism other than E. coli	1.22994	0.040809	-1.16568	0.192333
BB1842		conserved hypothetical protein		Conserved in organism other than E. coli	1.17994	0.0443055	-1.09851	NA
BB1843		conserved hypothetical protein	oxidoreductase activity	electron transport	1.27698	0.0136504	NA	NA
BB1844	acnA	putative aconitate hydratase	RNA binding	metabolism	1.45959	0.0444475	1.17724	0.0205061
BB1845		putative lipoprotein		Periplasmic/ Exported/ Lipoprotein	1.05618	0.0628787	-1.4105	NA
BB1846	brfB	putative ferric siderophore receptor	receptor activity	transport	NA	NA	1.84349	NA
BB1847		putative haloacid-type dehydrogenase	hydrolase activity, acting on acid halide bonds, in C-halide compounds	metabolism	-1.16105	0.0476174	NA	NA
BB1848		putative lipoprotein		Periplasmic/ Exported/ Lipoprotein	1.23277	0.0833072	-1.00212	0.0742462
BB1849		hypothetical protein		Unknown proteins, no known homologs	-2.29592	0.0450581	1.38748	NA	negative	-2.04273	0	0
BB1850	acnB	putative aconitate hydratase	tricarboxylic acid cycle	metabolism	-1.21567	0.0596274	-1.07162	0.066468
BB1851		putative exonuclease	exonuclease activity		1.15389	0.0656025	1.02961	0.301227
BB1852		conserved hypothetical protein		Conserved in organism other than E. coli	1.03349	0.0387674	1.12648	0.00919239
BB1853		conserved hypothetical protein		Conserved in organism other than E. coli	1.15404	0.0845299	1.45305	0.0473762
BB1854		conserved hypothetical protein		Conserved in organism other than E. coli	1.15121	0.0843617	1.1434	0.0756604
BB1855		putative integral membrane protein			1.26031	0.08655	1.09518	0.10253
BB1856		putative integral membrane protein		Cell envelope	1.42923	0.0754996	1.42005	0.0233345
BB1857		putative exported protein		Periplasmic/ Exported/ Lipoprotein	NA	NA	NA	NA
BB1858		Putative exported protein		Periplasmic/ Exported/ Lipoprotein	-1.08658	0.0354635	-1.27371	0.0452548
BB1859		Putative membrane protein		Cell envelope	-1.24495	0.0690875	NA	NA
BB1860		putative LysR-family transcriptional activator	transcription factor activity	Global Regulatory Functions	-1.20542	0.0339534	NA	NA
BB1861		putative acyl-CoA transferase	acetyl-CoA metabolism	metabolism	1.11698	0.0193208	1.20135	0.128693
BB1862		putative transmembrane transport protein	bile acid:sodium symporter activity	sodium ion transport	1.15321	0.16309	-2.35928	0.0212132
BB1863		putative LysR-family transcriptional regulator	transcription factor activity	Global Regulatory Functions	1.19103	0.210495	-1.5	0.0622254
BB1864	vag8	autotransporter	pathogenesis	transport	1.55321	0.0828596	-1.21418	0.0742462
BB1865		Maf-like protein			-1.01634	0.075821	-1.75893	NA
BB1866		conserved hypothetical protein		Conserved in organism other than E. coli	1.18366	0.0771608	1.13663	0.197283
BB1867		conserved hypothetical protein		Conserved in organism other than E. coli	1.19065	0.0572129	1.03553	0.0636396
BB1868	nadD	putative nicotinate-nucleotideadenylyltransferase	nicotinate-nucleotide adenylyltransferase activity	biosynthesis	-1.00003	0.0951706	-1.75893	NA
BB1869	hemF	coproporphyrinogen III oxidase	coproporphyrinogen oxidase activity	porphyrin biosynthesis	-1.04804	0.0461492	-1.12411	0.0459619
BB1870	purD	phosphoribosylamine--glycine ligase	phosphoribosylamine-glycine ligase activity	purine base biosynthesis	-1.07418	0.0214845	-1.17729	0.0494975
BB1871		conserved hypothetical protein		Conserved in organism other than E. coli	-1.06499	0.0531267	-1.21045	0.0247487
BB1872		conserved ATP-binding protein	ATP binding	transport	-1.05132	0.0362799	1.00761	0.0636396
BB1873		putative aminotransferase	transaminase activity		-1.23773	0.0584628	-1.05536	NA
BB1874		putative 2-hydroxyacid dehydrogenase	oxidoreductase activity, acting on the CH-OH group of donors, NAD or NADP as acceptor	L-serine biosynthesis	1.15151	0.0724848	1.00296	0.0275772
BB1875		putative aldehyde dehydrogenase	oxidoreductase activity	metabolism	1.21679	0.0370427	1.01777	0.019799
BB1876		putative membrane protein		Cell envelope	1.07456	0.0475701	1.1967	0.211425
BB1877		putative amidohydrolase	metallopeptidase activity	proteolysis and peptidolysis	1.01741	0.0379163	-1.06823	0.0318198
BB1878		putative acetylpolyamine aminohydrolase	hydrolase activity		-1.05744	0.0444878	NA	NA
BB1879		conserved hypothetical protein		Conserved in organism other than E. coli	1.04152	0.0305108	1.27369	0.108187
BB1880		aminobutyrate aminotransferase	4-aminobutyrate transaminase activity	aminobutyrate metabolism	-1.02662	0.0482726	NA	NA
BB1881		putative ABC transport ATP-binding subunit	ATP-binding cassette (ABC) transporter activity	transport	1.11386	0.0660311	1.03511	0.320319
BB1882		putative integral membrane transport protein	transporter activity	transport	-1.03497	0.0811833	1.06768	0.130108
BB1883		putative integral membrane transport protein	transporter activity	transport	-1.13727	0.0309652	1.02919	0.0445477
BB1884		putative solute-binding transport protein(periplasmic)	transporter activity	transport	-1.43201	0.0382252	NA	NA
BB1885		putative transcriptional regulator	transcription factor activity	Global Regulatory Functions	-1.32212	0.0853903	-1.98655	NA
BB1886		tartrate dehydrogenase	tartrate dehydrogenase activity	metabolism	-1.41617	0.0447723	-2.01706	NA
BB1887		putative multidrug resistance protein	transporter activity	transport	1.3566	0.0787403	-1.68978	0.142128
BB1888		putative multidrug resistance protein	protein transporter activity	protein secretion	1.17979	0.0950352	-1.27508	NA
BB1889		putative outer membrane protein	transporter activity	transport	-1.39717	0.0125466	NA	NA
BB1890		putative transcriptional regulator (MarRfamily)	transcription factor activity	Global Regulatory Functions	1.05849	0.0483457	1.18316	0.197283
BB1891		conserved hypothetical integral membraneprotein		Conserved in organism other than E. coli	-1.06025	0.118121	-1.47198	NA
BB1892		conserved hypothetical integral membraneprotein		Conserved in organism other than E. coli	1.06427	0.179519	NA	NA
BB1893	qor, hcz	quinone oxidoreductase	NADPH:quinone reductase activity		-1.20737	0.0728294	1.2923	0.161927
BB1894		heat shock protease	heat shock protein activity	Folding and Ushering	-1.13746	0.0280128	NA	NA
BB1895		probable integral membrane protein			-1.13286	0.0572589	1.01946	0
BB1896		putative sulfurtransferase	transferase activity		-1.35491	0.0345724	-1.22741	0.164049
BB1897		conserved hypothetical protein	catalytic activity	Conserved in organism other than E. coli	-1.53718	0.0918636	-3.36752	NA
BB1898		putative transcriptional regulator	transcription factor activity	Global Regulatory Functions	-1.15765	0.138923	NA	NA
BB1899		putative ABC transport ATP-binding subunit	ATP-binding cassette (ABC) transporter activity	transport	-1.13038	0.0470706	1.00592	NA
BB1900		putative ABC transport permease	transporter activity	transport	1.00298	0.0495375	1.00338	0.111723
BB1901		putative hydrolase	hydrolase activity	metabolism	-1.03945	0.0399063	-1.1611	NA
BB1902		putative periplasmic protein	transporter activity	transport	-1.02268	0.032078	NA	NA
BB1903		putative secreted oxidoreductase			-1.07332	0.049118	1.14425	0.132229
BB1904		Putative sigma-70 factor, ECF subfamily	transcription factor activity	transcription initiation	-1.08249	0.0248345	NA	NA
BB1905		putative extracellular heme-binding protein	receptor activity	transport	-1.23738	0.001	NA	NA
BB1906		putative iron-sulfur protein	oxidoreductase activity	electron transport	-1.44169	0.100295	NA	NA
BB1907		putative integral membrane protein	transferase activity, transferring groups other than amino-acyl groups		-1.6865	NA	NA	NA
BB1908		putative exported protein		Periplasmic/ Exported/ Lipoprotein	-1.82562	0.110223	NA	NA
BB1909		putative transcriptional regulator	DNA binding	regulation of transcription, DNA-dependent	-1.46844	0.0482355	NA	NA
BB1910	xseB	exodeoxyribonuclease VII small subunit	exodeoxyribonuclease VII activity	DNA catabolism	1.01682	0.091595	-1.21045	0.180312
BB1911		probable geranyltranstransferase	transferase activity	isoprenoid biosynthesis	1.16014	0.156498	NA	NA
BB1912	dxs	1-deoxy-D-xylulose 5-phosphate synthase	1-deoxy-D-xylulose-5-phosphate synthase activity	thiamin biosynthesis	1.10641	0.107344	1.01184	0.0282843
BB1913		conserved hypothetical protein		Conserved in organism other than E. coli	1.21506	0.128123	1.15102	0.0431335
BB1914	rpsF	30s ribosomal protein s6	structural constituent of ribosome	translation	1.08245	0.110211	1.24577	0.0982878
BB1915	priB	primosomal replication protein n	single-stranded DNA binding	DNA replication, synthesis of RNA primer	1.06132	0.0697977	1.20601	0.00919239
BB1916	rpsR	30s ribosomal protein s18	structural constituent of ribosome	translation	1.1716	0.0957953	1.0901	0.152028
BB1917	rplI	50s ribosomal protein l9	structural constituent of ribosome	translation	-1.1502	0.109019	-1.00639	0.0233345
BB1918		hypothetical protein	protein kinase activity	protein amino acid phosphorylation	-1.09004	0.120839	NA	NA
BB1919	dnaB	DNA helicase	DNA binding	DNA replication	-1.10328	0.127568	1.17005	NA
BB1920		putative exported protein		Periplasmic/ Exported/ Lipoprotein	-1.21887	0.0424566	NA	NA
BB1921		conserved hypothetical protein		Conserved in organism other than E. coli	-1.24288	0.0327032	NA	NA
BB1922		hypothetical protein	ATP binding	cellular response to phosphate starvation	1.13722	0.0702224	1.03046	0.00424264
BB1923		hypothetical protein		Unknown proteins, no known homologs	1.12963	0.0994525	-1.00639	0.101116
BB1924		conserved hypothetical protein		Conserved in organism other than E. coli	1.01667	0.133347	-1.10416	0.0841457
BB1925		putative aminotransferase	aromatic amino acid family biosynthesis	biosynthesis	1.22518	0.210273	1.27073	0.108894
BB1926		homoserine dehydrogenase	amino acid biosynthesis	metabolism	-1.02346	0.0798588	-1.23446	0.106773
BB1927	thrC	threonine synthase	threonine synthase activity	threonine biosynthesis	1.13172	0.193552	1.31049	0.0537401
BB1928		lipoprotein		Periplasmic/ Exported/ Lipoprotein	-1.26535	0.0212995	-1.11404	0.137179
BB1929	fbp, fdp	fructose-1,6-bisphosphatase	fructose-bisphosphatase activity	metabolism	-1.23657	0.115654	-1.02161	0.046669
BB1930	pepN	aminopeptidase N	membrane alanyl aminopeptidase activity	proteolysis and peptidolysis	1.03096	0.0739368	-1.03912	0.0770746
BB1931		putative exported protein		Periplasmic/ Exported/ Lipoprotein	-1.2735	0.0386882	NA	NA
BB1932	bph3	putative DNA-binding protein (histone)	DNA binding	Global Regulatory Functions	1.13678	0.16092	1.18486	0.033234
BB1933		putative hydrolase	hydrolase activity, acting on carbon-nitrogen (but not peptide) bonds	nitrogen metabolism	-1.13708	0.0495307	1.11844	0.118794
BB1934		conserved hypothetical protein		Conserved in organism other than E. coli	-1.2399	0.0657665	-1.0849	0.0106066
BB1935	aroG	phospho-2-dehydro-3-deoxyheptonate aldolase,Phe-sensitive	aromatic amino acid family biosynthesis	metabolism	1.0631	0.0576953	NA	NA
BB1936	fhaL	adhesin	pathogenesis	Cell envelope	NA	NA	NA	NA
BB1937		putative oxidoreductase		electron transport	-1.10274	0.0585	NA	NA
BB1938	glcD	glycolate oxidase subunit		electron transport	1.09391	0.0476144	1.05838	0.0155563
BB1939	glcE	glycolate oxidase subunit		electron transport	1.14571	0.0420991	NA	NA
BB1940	glcF	glycolate oxidase iron-sulfur subunit	electron transporter activity	electron transport	1.14856	0.0697176	1.15651	NA
BB1941		putative exported protein	catalytic activity	Periplasmic/ Exported/ Lipoprotein	-1.09359	0.0397157	NA	NA
BB1942	bfeA	ferric enterobactin receptor	receptor activity	transport	1.02143	0.0648266	-1.17964	0.0212132
BB1943		putative transcriptional regulator	transcription factor activity	Global Regulatory Functions	-1.1223	0.0806148	NA	NA
BB1944	pntB, nntB	NAD(P) transhydrogenase subunit beta	NAD(P)+ transhydrogenase (AB-specific) activity	electron transport	-2.66945	0.0205	NA	NA
BB1945	pntAB, nntA2	NAD(P) transhydrogenase, subunit alpha part 2	NAD(P)+ transhydrogenase (AB-specific) activity		-1.61545	0.0803632	1.01058	0.0473762
BB1946	pntaA, nntA1	NAD(P) transhydrogenase, subunit alpha part 1	NAD(P)+ transhydrogenase (AB-specific) activity	electron transport	1.08245	0.0344068	1.20601	0.0219203
BB1947		putative hydrolase	hydrolase activity		-1.14698	0.0702646	1.24746	0.0657609
BB1948		putative exported protein		Periplasmic/ Exported/ Lipoprotein	-1.27133	0.0378448	1.32699	0.0233345
BB1949		putative LysR-family transcriptional regulator	transcription factor activity	Global Regulatory Functions	1.16744	0.0712978	-1.18378	0.321734
BB1950	trmU	tRNA(5-methylaminomethyl-2-thiouridylate)-methyltransferase	tRNA(5-methylaminomethyl-2-thiouridylate)-methyltransferase activity	translation	1.22027	0.0593918	NA	NA
BB1951		putative integral membrane protein			1.20792	0.0390467	1.20093	0.0912168
BB1952		conserved hypothetical protein		Conserved in organism other than E. coli	1.22563	0.037452	1.01946	NA
BB1953	purB	adenylosuccinate lyase	adenylosuccinate lyase activity	purine ribonucleotide biosynthesis	-1.16528	0.0511876	-1.0889	0.143543
BB1954		putative c'cytochrome	electron transporter activity	electron transport	-1.32603	0.0212552	-1.29463	0.00707107
BB1955		putative integral membrane protein	oxidoreductase activity	electron transport	-1.55857	0.0696925	-3.27424	NA
BB1956		hypothetical protein		Unknown proteins, no known homologs	1.32252	0.180877	1.72758	0.059397
BB1957		putative lipoprotein		Periplasmic/ Exported/ Lipoprotein	-1.36899	0.033	NA	NA
BB1958		putative exported protein		Periplasmic/ Exported/ Lipoprotein	-1.11946	0.192971	-1.19454	0.0841457
BB1959		conserved hypothetical protein		Conserved in organism other than E. coli	-1.21037	0.148802	NA	NA
BB1960		conserved hypothetical protein		Conserved in organism other than E. coli	1.03765	0.0544028	1.64552	0.0311127
BB1961		hypothetical protein	catalytic activity		-1.33605	0.0541857	-1.48773	0.0120208
BB1962		Hypothetical protein		Unknown proteins, no known homologs	-2.14117	0.0952785	NA	NA	negative	-2.42287	0	0
BB1963		hypothetical protein		Unknown proteins, no known homologs	-1.59105	0.0467835	-1.17964	NA
BB1964		hypothetical protein		Unknown proteins, no known homologs	1.13931	0.0823223	-1.2148	NA
BB1965		hypothetical protein		Unknown proteins, no known homologs	1.05715	0.0388788	-1.1172	0.190919
BB1966		conserved hypothetical protein		Conserved in organism other than E. coli	-1.07038	0.131329	NA	NA
BB1967		conserved hypothetical protein		Conserved in organism other than E. coli	1.28025	0.0398135	NA	NA
BB1968		putative membrane protein		Cell envelope	-2.10891	0.0632311	NA	NA	negative	-2.62294	0	0
BB1969		putative phospholipase D family protein	catalytic activity	metabolism	-1.11021	0.0751229	NA	NA
BB1970		putative membrane protein	glutamate synthase activity	glutamate biosynthesis	1.18165	0.0782915	-2.92574	0.00282843
BB1971		putative membrane protein		Cell envelope	2.22533	0.361616	-2.9403	NA	positive	2.44587	0	0
BB1972		putative membrane protein		Cell envelope	1.18931	0.0716624	1.18528	0.00282843
BB1973		putative acetyltransferase	N-acetyltransferase activity		-1.37403	0.0755544	NA	NA
BB1974		conserved hypothetical protein		Conserved in organism other than E. coli	-1.42581	0.0693726	NA	NA
BB1975	rnr, vacB	putative ribonuclease R	RNA binding	RNA metabolism	1.2292	0.0642831	1.06557	0.140714
BB1976		putative tRNA	RNA binding	translation	-1.05565	0.146572	NA	NA
BB1977		Cys	amino acid metabolism	metabolism	-1.29371	0.0978124	-1.16683	NA
BB1978		conserved hypothetical protein	oxidoreductase activity, acting on single donors with incorporation of molecular oxygen, incorporation of two atoms of oxygen	Conserved in organism other than E. coli	-1.46883	0.0958445	-2.46764	NA
BB1979	hupB, hopd	DNA-binding protein Hu-beta	DNA binding		-1.21501	0.107225	-1.11615	0.0452548
BB1980	tonB	siderophore-mediated iron transport protein	iron ion transporter activity	iron ion transport	-1.52082	0.0533058	1.15651	0.123037
BB1981	exbB	MotA	protein transporter activity	transport	-1.92798	0.0637994	NA	NA	negative	-1.85053	0	0.824729
BB1982	exbD	biopolymer transport protein ExbD	transporter activity	transport	-1.47185	0.0659835	-1.50191	NA
BB1983	basR	response regulator protein	two-component response regulator activity	Global Regulatory Functions	-1.06011	0.0183297	NA	NA
BB1984		sensor kinase protein	two-component sensor molecule activity	signal transduction	1.0637	0.0425523	-1.03639	0.197283
BB1985	kup, trkD	putative potassium uptake protein	potassium ion transporter activity	potassium ion transport	1.06057	0.0454838	NA	NA
BB1986	argG	argininosuccinate synthase	arginine biosynthesis	metabolism	-1.00194	0.0613822	1.14509	0.198697
BB1987	argF	ornithine carbamoyltransferase	amino acid metabolism	metabolism	-1.13076	0.0548712	-1.53906	NA
BB1988	argD	putative acetylornithine aminotransferase	arginine biosynthesis	metabolism	1.11921	0.0546331	NA	NA
BB1989		conserved hypothetical protein		Conserved in organism other than E. coli	-1.05978	0.0281089	-1.05583	0.120915
BB1990		LysR family regulatory protein	transcription factor activity	Global Regulatory Functions	-1.10637	0.0473395	1.04357	0.0233345
BB1991		putative short chain dehydrogenase	oxidoreductase activity	metabolism	-1.27145	0.0298255	NA	NA
BB1992		putative D-isomer specific 2-hydroxyaciddehydrogenase	oxidoreductase activity, acting on the CH-OH group of donors, NAD or NADP as acceptor	L-serine biosynthesis	-1.66828	0.023862	NA	NA
BB1993		putative lipoprotein		Periplasmic/ Exported/ Lipoprotein	-1.5462	0.126884	NA	NA
BB1994		hypothetical protein		Unknown proteins, no known homologs	-1.34798	0.0741534	-2.26437	NA
BB1995		conserved hypothetical protein		Conserved in organism other than E. coli	-1.32316	0.10645	-2.42213	NA
BB1996		GntR family regulatory protein	transcription factor activity	Global Regulatory Functions	-1.12631	0.0268588	-1.78281	NA
BB1997		putative malate dehydrogenase	L-malate dehydrogenase activity	metabolism	1.24602	0.162153	1.23308	0.0403051
BB1998		putative dihydroxy-acid dehydratase	dihydroxy-acid dehydratase activity	metabolism	-1.21424	0.0325919	NA	NA
BB1999		putative exported protein		Periplasmic/ Exported/ Lipoprotein	-2.16115	0.0558697	-2.4625	NA	negative	-2.25616	0	0
BB2000		putative aldolase	aldolase activity	metabolism	-1.35001	0.0508175	NA	NA
BB2001	rpst	30s ribosomal protein s20	RNA binding	translation	1.22179	0.297242	-1.22234	0.0127279
BB2002		putative membrane protein		Cell envelope	-1.96204	0.0582142	NA	NA	negative	-2.36729	0	0
[truncated: 2,979 more rows]
