# Supplementary material for: Identification of a CO2 Responsive Regulon in Bordetella
Source: PLoS One. 2012 Oct 24;7(10):e47635. doi: 10.1371/journal.pone.0047635 (PMC3480411; doi:10.1371/journal.pone.0047635)
Supplement: Table S4 — Genes Increased and Decreased in Transcription in response to 5% CO2 conditions in B. bronchiseptica strains RB50 and 761. (XLSX) [file pone.0047635.s005.xlsx]

## Sheet: Sheet1
Table S4. Genes Increased and Decreased in Transcription in response to 5% CO2 conditions in B. bronchiseptica strains RB50 and 761.
Genes Increased in Transcription in response to 5% CO2 conditions in B. bronchiseptica strains RB50 and 761.
ORF	Gene	Function	General Category
BB0110		hypothetical	Cell Adhesin
BB0324	cyaA, cya	adenylate cyclase activity	Periplasmic/ Exported/ Lipoprotein
BB0452		hypothetical	Transport
BB0604		oxidoreductase activity	Metabolism
BB1610	bscE	hypothetical	Unknown proteins, no known homologs
BB2996	bvgR		Global Regulatory Functions
Genes Decreased in Transcription in response to 5% CO2 conditions in B. bronchiseptica strains RB50 and 761.
ORF	Gene	Function	General Category
BB0444		hypothetical	Periplasmic/ Exported/ Lipoprotein
BB0515		hypothetical	Conserved in organism other than E. coli
BB0909		hypothetical	Conserved in organism other than E. coli
BB1187		transcription factor activity	Global Regulatory Functions
BB1189		ATP-binding cassette (ABC) transporter activity	Transport
BB1190		hypothetical	Unknown proteins, no known homologs
BB1191		transporter activity	Transport
BB1721		hypothetical	Periplasmic/ Exported/ Lipoprotein
BB2462		proteolysis and peptidolysis	Folding and Ushering
BB2516		gamma-glutamyltransferase activity
BB2539	flaA	structural molecule activity	Chemotaxis, motility
BB2540	fliA, flaD	transcription factor activity	Global Regulatory Functions
BB2541	flhD, flbB, frlA	transcription factor activity	Global Regulatory Functions
BB2547	cheW	signal transducer activity	Chemotaxis, motility
BB2548	tsr, cheD	signal transducer activity	Chemotaxis, motility
BB2549	cheR, cheX	protein-glutamate O-methyltransferase activity	Chemotaxis, motility
BB2551	cheY	two-component response regulator activity	Global Regulatory Functions
BB2559	flgB, flbA, fla FII	motor activity	Chemotaxis, motility
BB2560	flgC, flaW, fla FIII	motor activity	Chemotaxis, motility
BB2562	flgE, flaK, fla FV	motor activity	Chemotaxis, motility
BB2563	flgF, flaX, fla FVI	motor activity	Chemotaxis, motility
BB2564	flgG, flaL, fla FVII	motor activity	Chemotaxis, motility
BB2568	flgK, flaS, flaW	hypothetical	Chemotaxis, motility
BB2569	flgL, flaT, flaU	structural molecule activity	Chemotaxis, motility
BB2570	tsr, cheD	signal transducer activity	Chemotaxis, motility
BB2571	tar, cheM		Chemotaxis, motility
BB2573		hypothetical	Periplasmic/ Exported/ Lipoprotein
BB2584	fliJ, flaO, flaS	motor activity	Chemotaxis, motility
BB2585	fliI, fla AIII, flaC	ATP binding	Transport
BB2586	fliH, fla BIII, fla AII.3	motor activity	Chemotaxis, motility
BB2587	fliG, fla BII, fla AII.2	motor activity	Chemotaxis, motility
BB2588	fliF, fla BI, fla AII.1	motor activity	Chemotaxis, motility
BB2593	fliT	hypothetical	Chemotaxis, motility
BB2594	fliS	hypothetical	Chemotaxis, motility
BB2595	fliD, flbC, flaV	hypothetical	Chemotaxis, motility
BB2934	tviD	hypothetical	Cell envelope
BB2946		transporter activity	Transport
BB3105		hypothetical	Unknown proteins, no known homologs
BB3994		hypothetical	Unknown proteins, no known homologs
BB4326	ureA	urease activity	Nitrogen metabolism
BB4921		hypothetical	Metabolism
