# Supplementary material for: Identification of a CO2 Responsive Regulon in Bordetella
Source: PLoS One. 2012 Oct 24;7(10):e47635. doi: 10.1371/journal.pone.0047635 (PMC3480411; doi:10.1371/journal.pone.0047635)
Supplement: Table S5 — Colony characteristics of RB50 and JC100 derivatives under different conditions. (XLSX) [file pone.0047635.s006.xlsx]

## Sheet: Sheet1
Table S5. Colony characteristics of RB50 and JC100 derivatives under different conditions.
Strains	37oC	37oC + 5% CO2	37oC + N.A.*	37oC + 5% CO2 + N.A.*
RB50	+	+	-	-
RB55 (RB50∆bvgAS)	-	-	-	-
RB55::pBvgASJC100	+	+	-	-
RB53 (RB50 bvgS-C3)	+	+	+	+
JC100	J	+	-	-
MLJC114 (JC100∆bvgAS)	-	-	-	-
MLJC114::pEG100	J	+	-	-
MLJC106 (JC100 bvgS-C3)	J	+	-	+
+ = Bvg+ phase (hemolytic, small, domed)
- = Bvg- phase (non-hemolytic, large, flat)
J = JC100 at 37C in normal atmospheric condition (non-hemolytic, flattish, intermediate size)
